# Supplementary material for: TRAF6 Phosphorylation Prevents Its Autophagic Degradation and Re-Shapes LPS-Triggered Signaling Networks
Source: MDPI journal article supplement (doi:10.3390/cancers13143618), 2021-07-19
Supplement: s1 [file s1]

(R)EIL**pS**LMVK(C)

(Mascot ion score: 29.02)

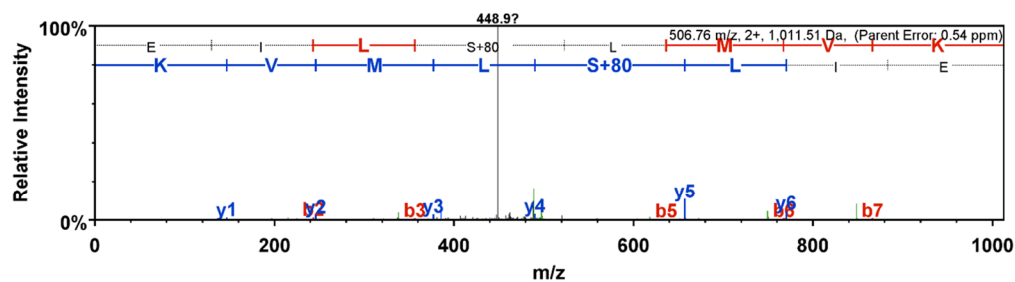

(R)RQVpScDNcAASMAFEDK(E) (Mascot ion score: 34, missed cleavage)

(R)RQV**p**ScDNcAASMAFEDK(E) (Mascot ion score: 34, missed cleavage)

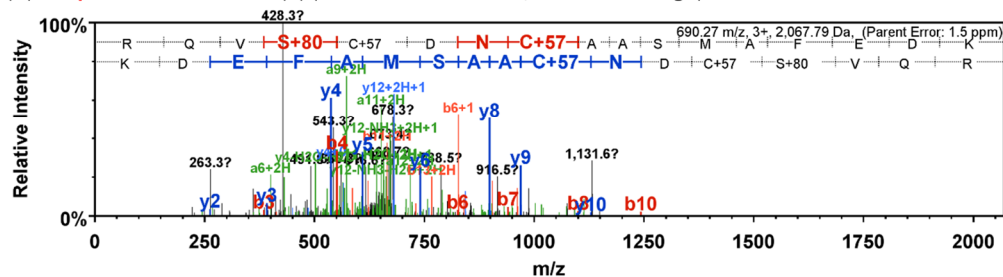

(R)QV**p**S<sub>c</sub>DNcAASmAFEDK(E) (Mascot ion score: 77.04)

(R)QV**p**S<sub>c</sub>DNcAASmAFEDK(E) (Mascot ion score: 77.04)

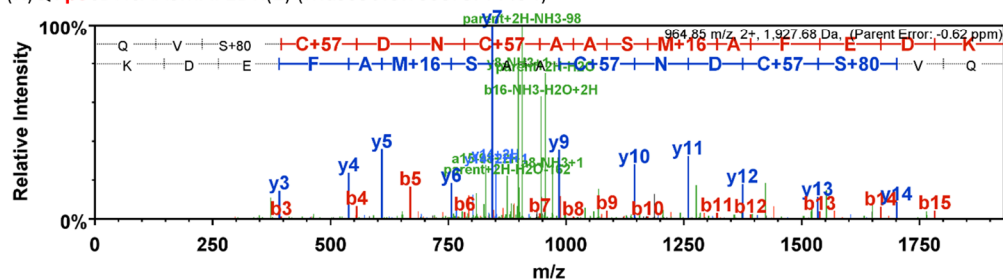

**(C) TRAF6-S268**

(R)HLQENTQ**p**SHMR(M) (Mascot ion score: 39)

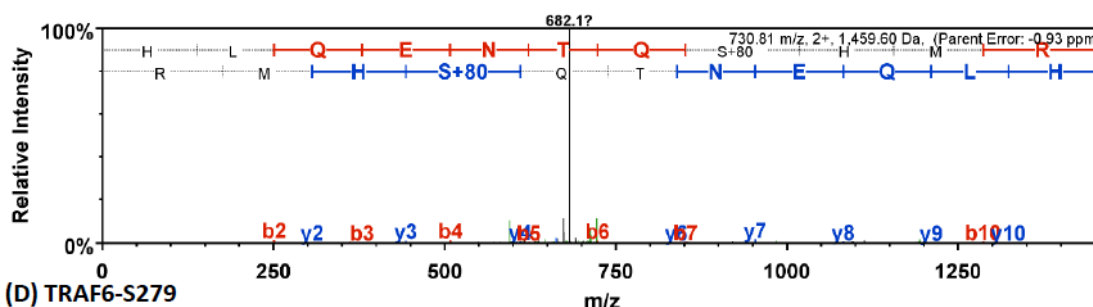

**(D) TRAF6-S279**

(R)MLAQAVH**p**SLSVIPDSGYISEVR(N) (Masot ion score: 74.46)

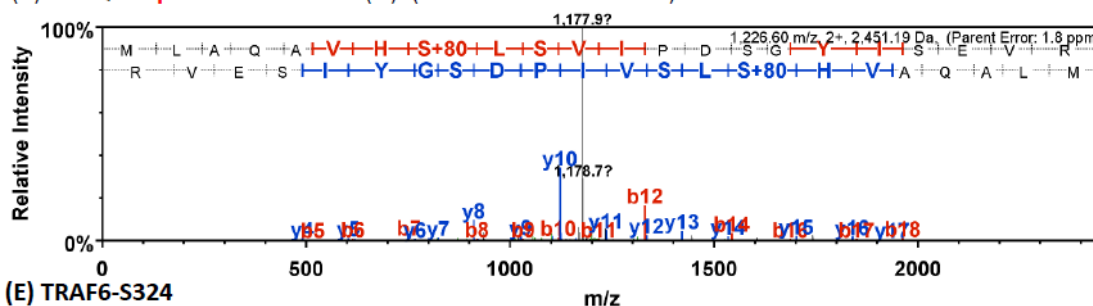

**(E) TRAF6-S324**

(K)METQ**p**SMYVSELKR(T) (Masot ion score: 74.46)

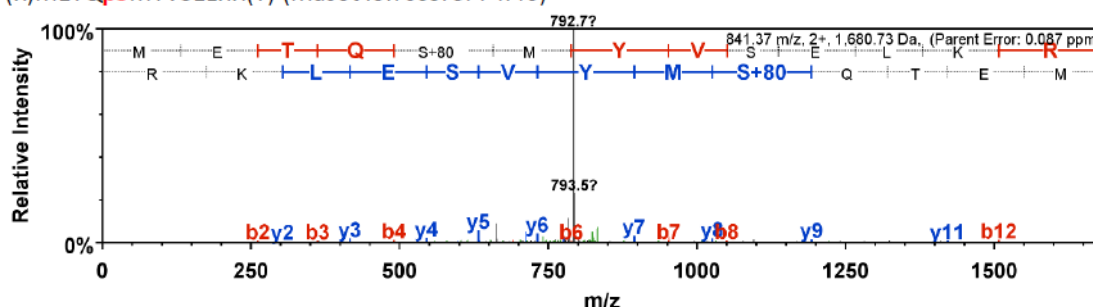

**Figure S1.** MS2 Spectra of TRAF6 phosphorylation sites only seen in presence of IKK $\epsilon$ . Representative spectra for the sites (A) S129, (B) S188, (C) S268, (D) S279 and (E) S324 are shown. For S188 (B) and additional spectrum without missed cleavage and acquired by MSA (multi-stage activation) is shown. The phosphosites are shown in red.

**A**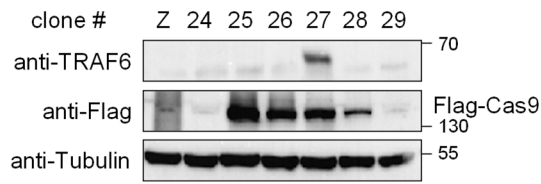**B**

aca aaa gat gat agt gtg ggt gga act gcc agc acg ggg aac ctc tcc agc acg  
 T K D D S V G G T A S T G N L S S T  
 31

+g

**Figure S2. (A)** 293 TLR4 cells were transfected with the vector px459-TRAF6 which directs the synthesis of Cas9 and a sgRNA targeting the first exon of TRAF6. Transfected cells were selected by puromycin treatment and surviving clones were grown to colonies. A fraction of the indicated cell clones was lysed and equal amounts of protein were tested by immunoblotting for expression levels of TRAF6, Cas9 and Tubulin with specific antibodies. **(B)** TRAF6-deficient cells were tested for the occurrence of genetic changes by PCR and sequencing. The underlined areas were deleted and the G was inserted as shown, leading to frame-shifts and defect TRAF6 expression.

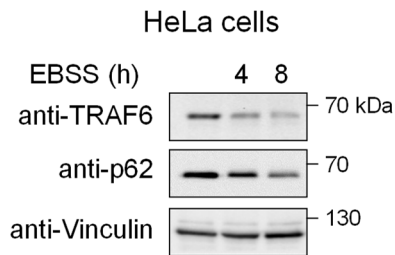

**Figure S3.** HeLa cells were exposed for the indicated periods to EBSS medium and analyzed by Western blotting for expression of the indicated proteins.

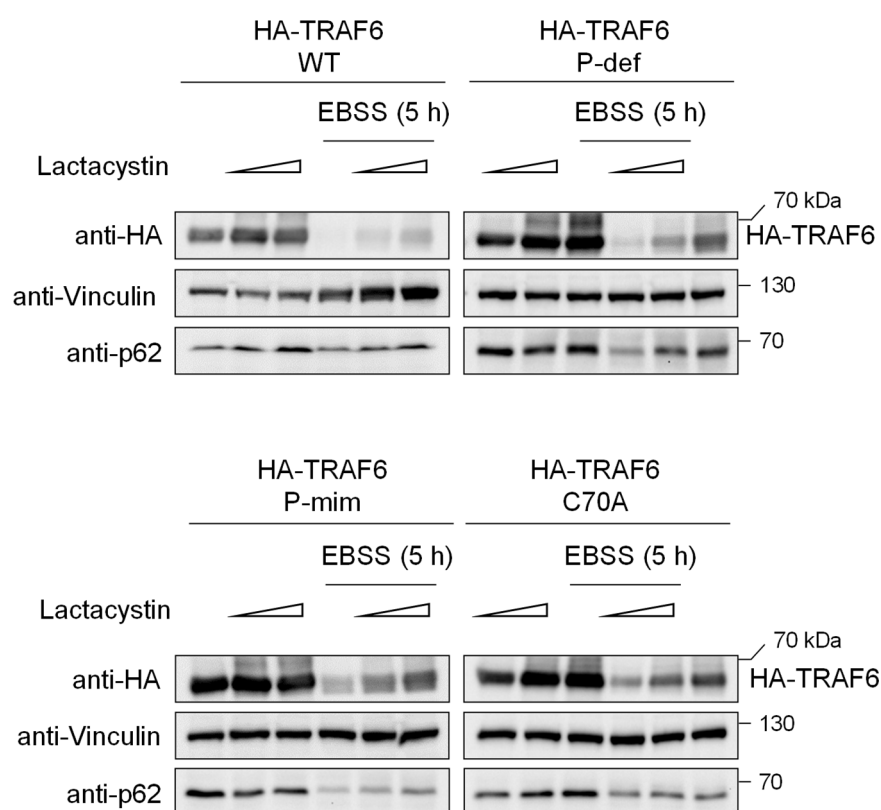

**Figure S4.** The indicated cell lines were incubated with EBSS medium for 5 h as shown and simultaneously treated with increasing amounts of the proteasome inhibitor Lactacystin (5, 10  $\mu$ M). Cell extracts were prepared and analyzed for expression of the indicated proteins by Western blotting.

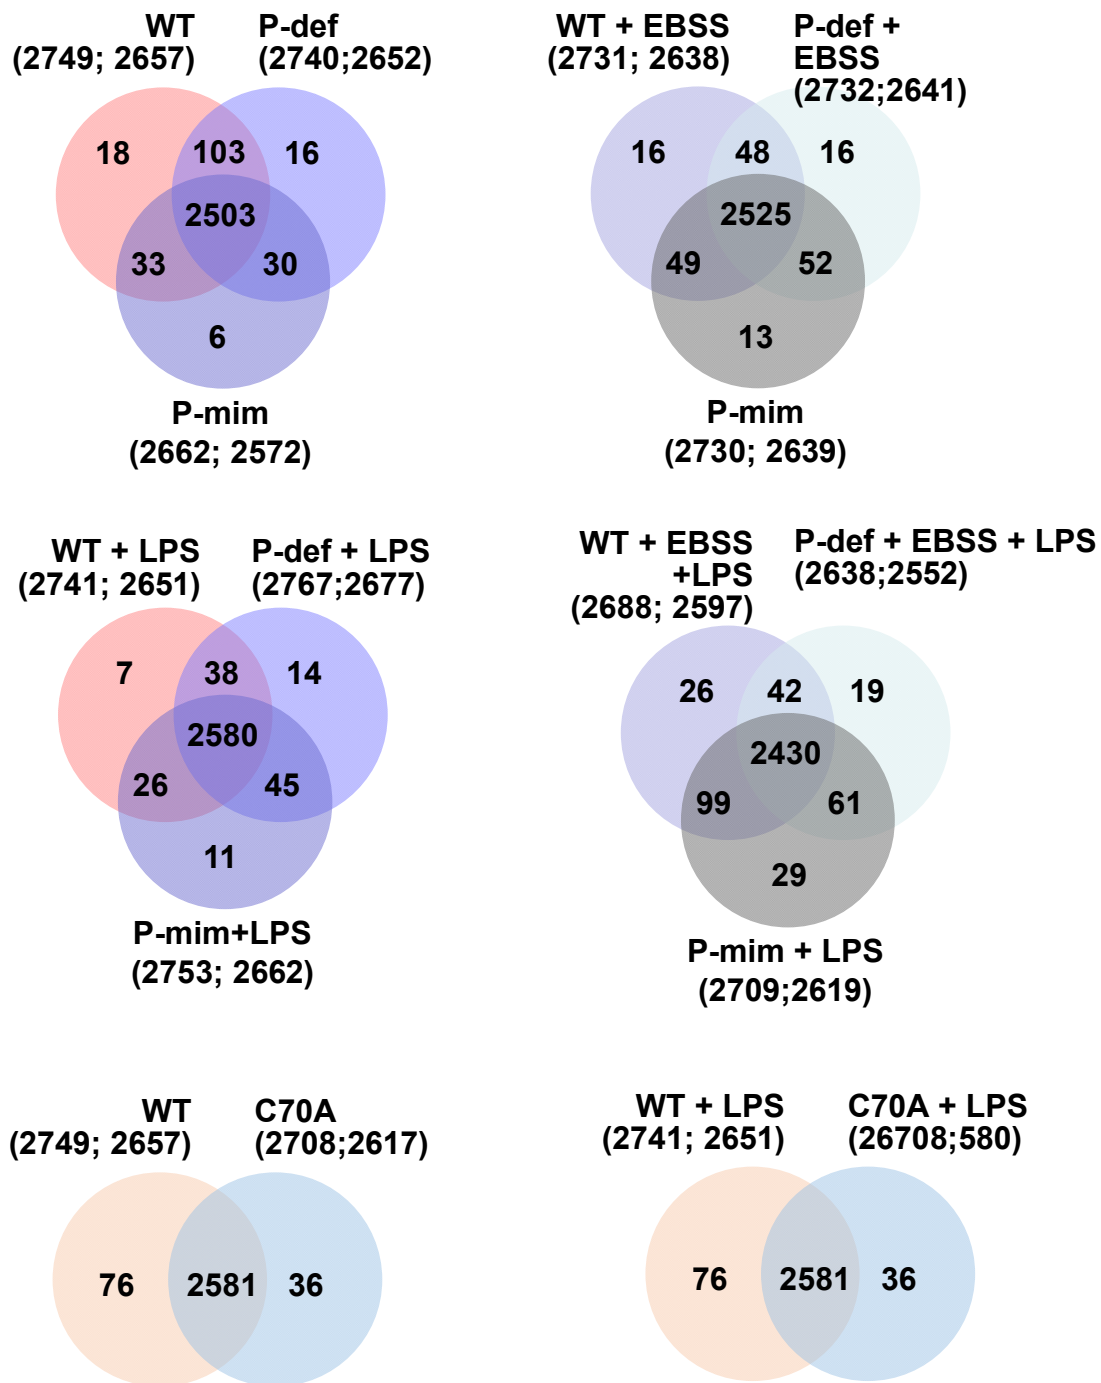

**Figure S5.** The Venn diagrams show the number of phosphopeptides measured under the indicated conditions in the various cells. The numbers in the brackets indicate (all P-peptides; unique P-peptides).

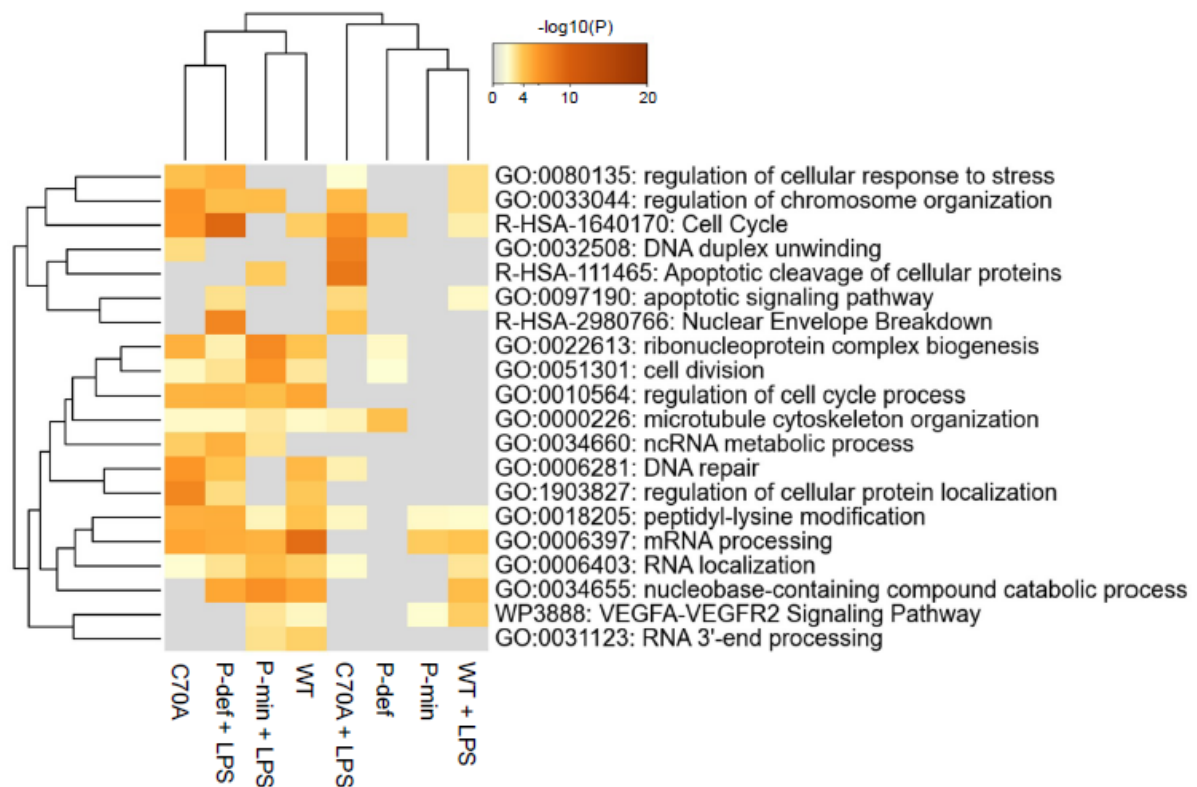

**Figure S6.** Protein Ids mapping to the unique groups of deregulated phosphopeptides shown were further used to perform an overrepresentation (ORA) analysis using Metascape. The enriched pathway terms are indicated, the grey fields visualize lack of enrichment.

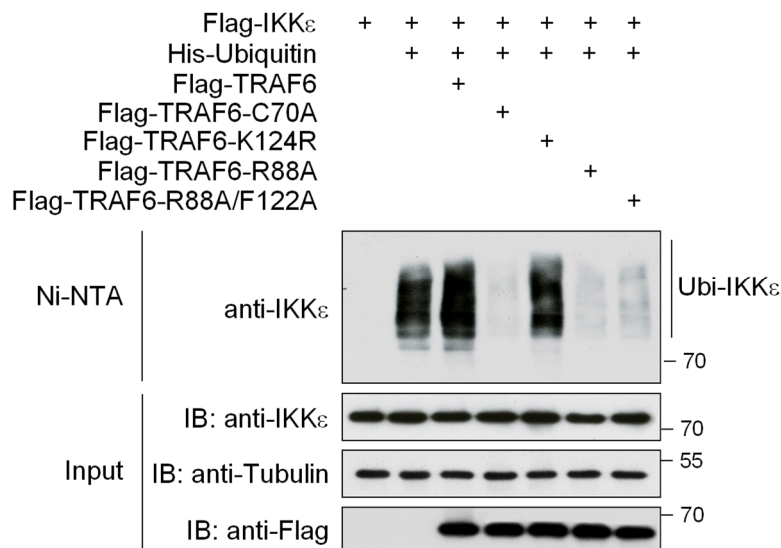

**Figure S7.** HEK293 cells expressing Flag-IKK $\epsilon$  alone or along with His<sub>6</sub>-ubiquitin and the indicated TRAF6 variants (C70A: defective in E3 ligase function; K124R: defective in autoubiquitination; R88A and R88A/F122A: defective in dimerization) were lysed under denaturing conditions. One aliquot was used for the input sample, while the remaining material was used to enrich His<sub>6</sub>-ubiquitinated proteins on Ni-NTA beads. The eluted samples were analyzed by Western blotting to detect IKK $\epsilon$  ubiquitination using anti-IKK $\epsilon$  antibodies.

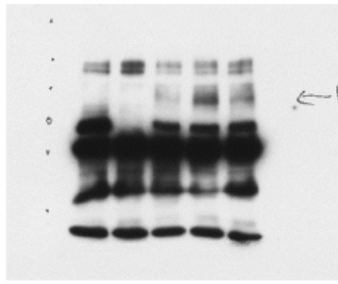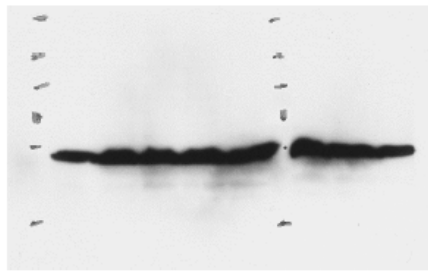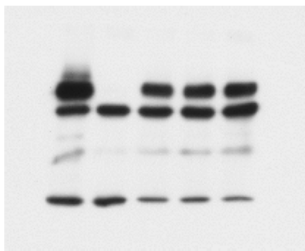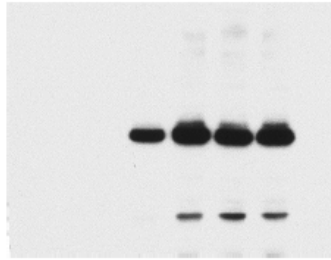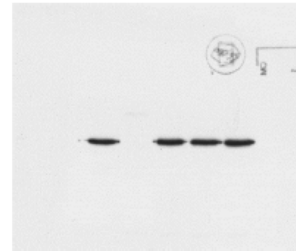

1A

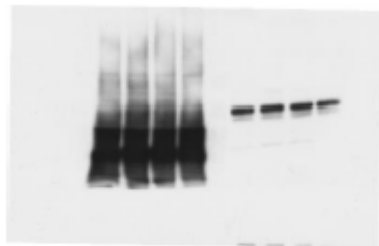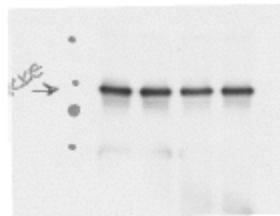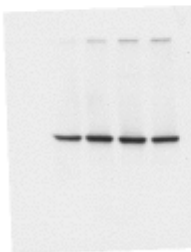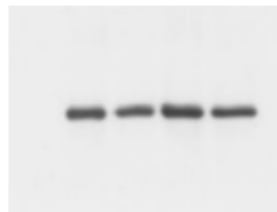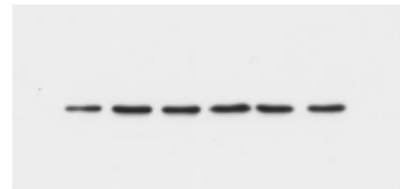

1B

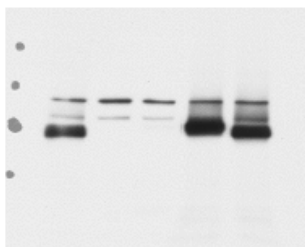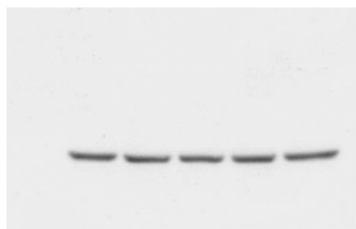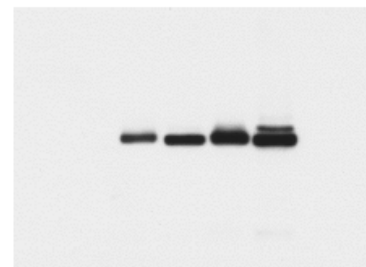

1C

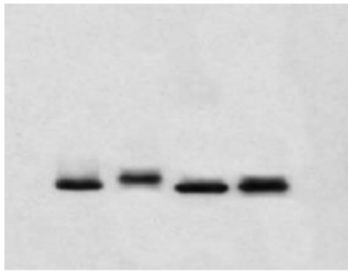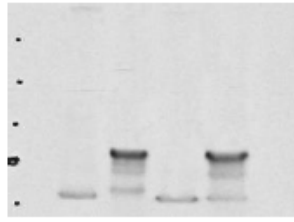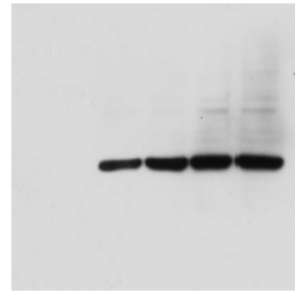

1D



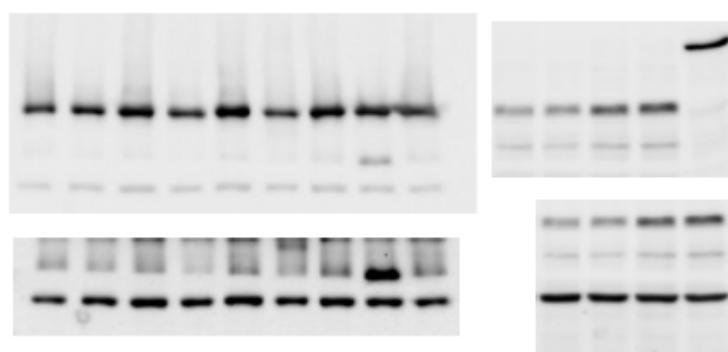

3A

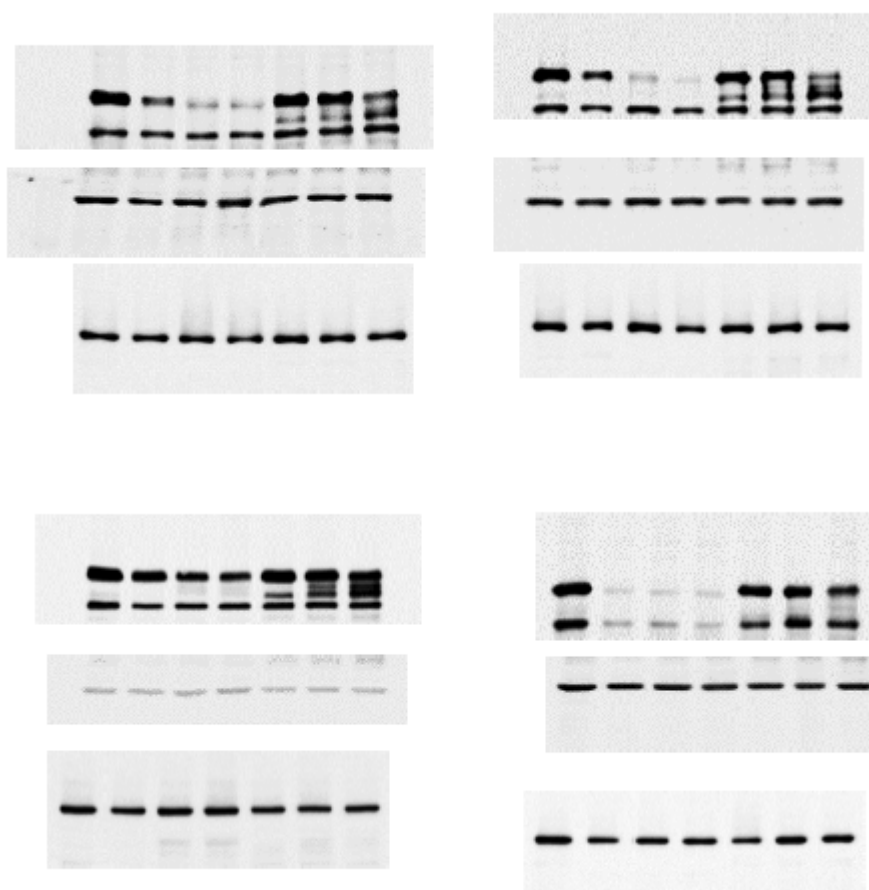

3B

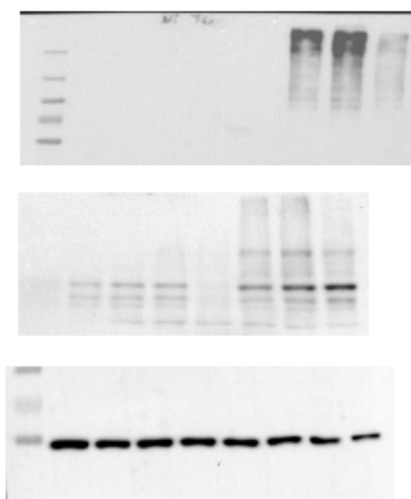

3C

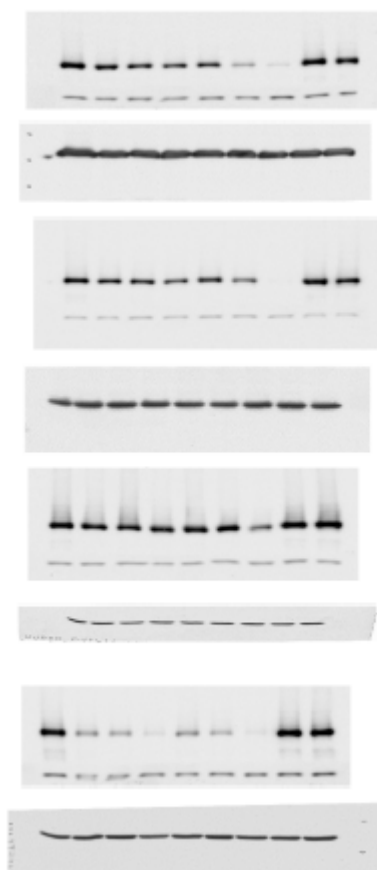

4A

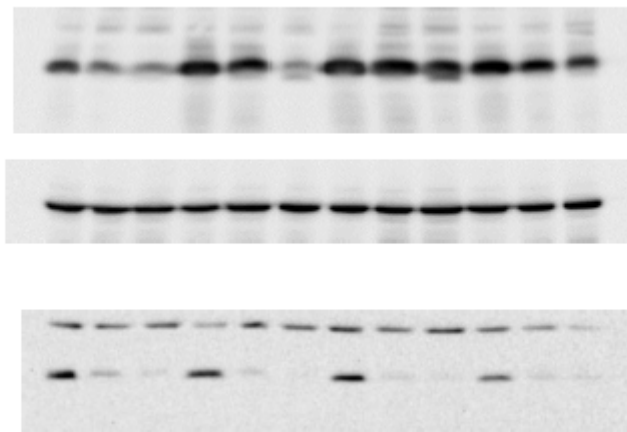

5A

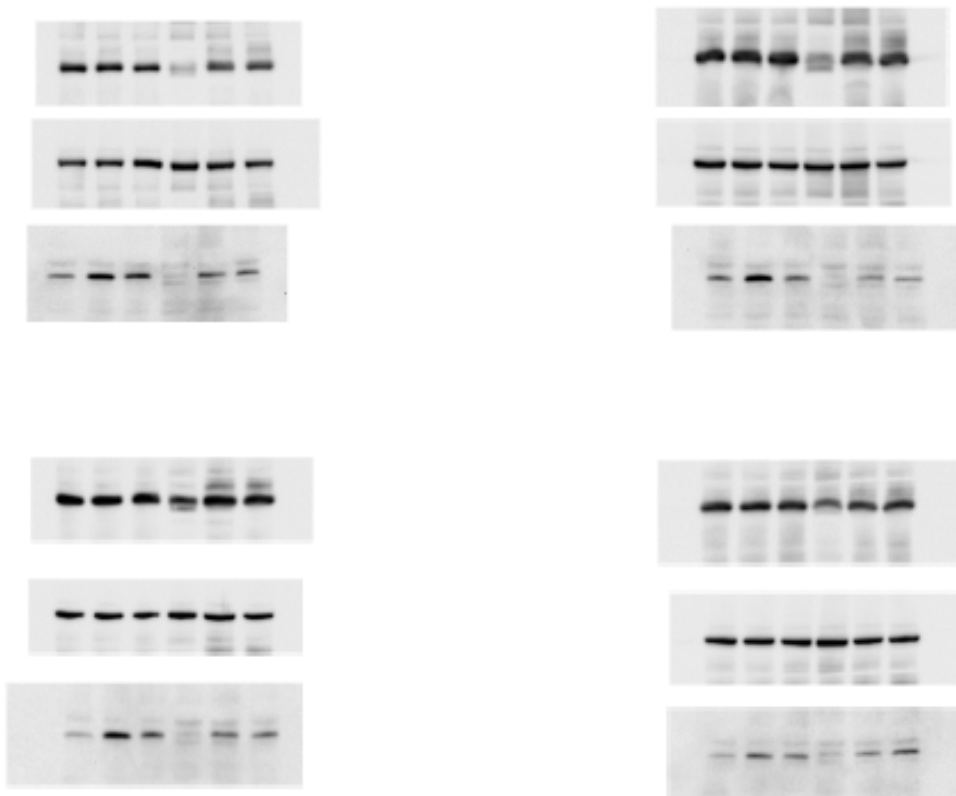

5B

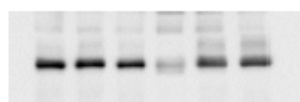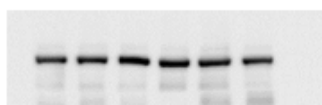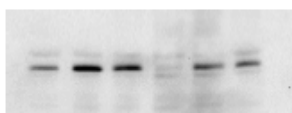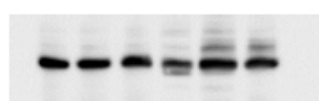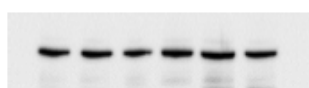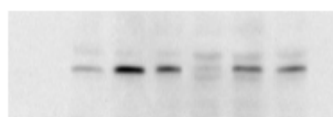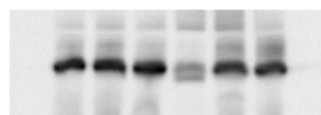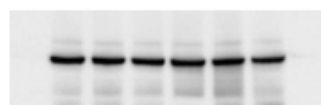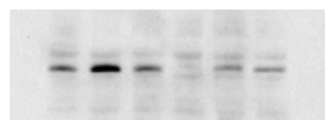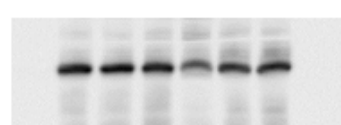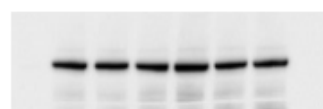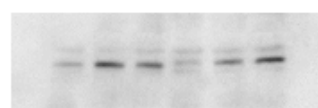

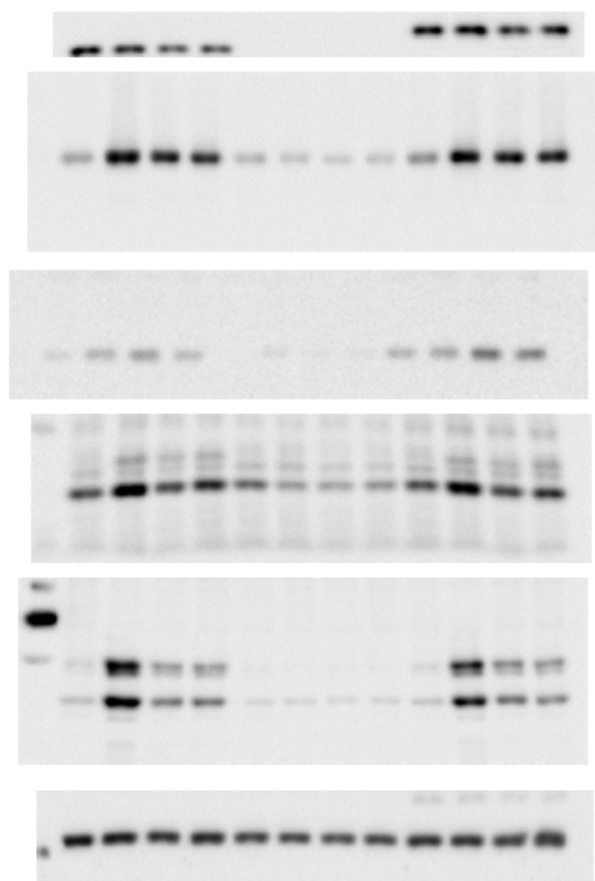

6A

**Figure S8.** Whole Western Blots

**Table S1.** Antibodies and plasmids.

| Primary antibody (clone)                  | Species    | Supplier       |
|-------------------------------------------|------------|----------------|
| anti-TRAF6 (EP591Y)                       | rabbit mAb | Abcam          |
| anti-IKK $\epsilon$ (72B587)              | mouse mAb  | Abcam          |
| anti-Vinculin (V9131)                     | mouse mAb  | Sigma          |
| anti-HA (3F10)                            | rat mAb    | Sigma          |
| anti-Flag (M2)                            | mouse mAb  | Sigma          |
| anti-Myc (9E10)                           | mouse mAb  | Sigma          |
| anti-p62 (D3)                             | mouse mAb  | Santa Cruz     |
| anti-phospho p65<br>(Ser536) (93H1)       | rabbit mAb | Cell signaling |
| anti-phospho I $\kappa$ B $\alpha$ (14D4) | rabbit mAb | Cell signaling |
| anti-phospho p38 (#9211)                  | rabbit pAb | Cell signaling |
| anti-phospho JNK (81E11)                  | rabbit mAb | Cell signaling |
| anti-Myc (9E10)                           | mouse mAb  | Sigma          |
| anti- $\beta$ -Tubulin (Tub2.1)           | mouse mAb  | Sigma          |

|                      |            |            |
|----------------------|------------|------------|
| anti- $\beta$ -Actin | rabbit pAb | Abcam      |
| IgG control          | mouse pAb  | Santa Cruz |
| IgG control          | rabbit pAb | Santa Cruz |

| Secondary antibody (clone) | Conjugated to | Supplier |
|----------------------------|---------------|----------|
| goat-anti-mouse IgG        | HRP           | Dianova  |
| goat-anti-rabbit IgG       | HRP           | Dianova  |
| goat-anti-rat IgG          | HRP           | Dianova  |

| Plasmid                        | Origin              | Reference          |
|--------------------------------|---------------------|--------------------|
| Myc-IKK $\epsilon$             | Dr. Chariot, Liege  | PMID: 12133833 [1] |
| Flag-IKK $\epsilon$ WT         | Schmitz lab         | PMID: 20507904 [2] |
| Flag-IKK $\epsilon$ KD         | Schmitz lab         | PMID: 20507904 [2] |
| Flag-TRAF6 and mutants         | Dr. Darnay, Houston | PMID: 17135271 [3] |
| His <sub>6</sub> -HA-ubiquitin | R. Baer, New York   | PMID: 15166217 [4] |
| (HA) <sub>2</sub> -TRAF6 WT    | this study          |                    |
| (HA) <sub>2</sub> -TRAF6 P-def | this study          |                    |
| (HA) <sub>2</sub> -TRAF6 P-mim | this study          |                    |
| (HA) <sub>2</sub> -TRAF6 C70A  | this study          |                    |
| px459                          | Dr. Feng Zhang lab  | Addgene            |
| px459-TRAF6                    | this study          |                    |

| Oligo name    | Sequence (5' to 3')       |
|---------------|---------------------------|
| px459-TRAF6-f | caccgtgggtggaactgccagcacg |
| px459-TRAF6-r | aaaccgtgctggcagttccaccac  |

## References

1. Chariot A, Leonardi A, Muller J, Bonif M, Brown K, Siebenlist U. Association of the adaptor TANK with the I kappa B kinase (IKK) regulator NEMO connects IKK complexes with IKK epsilon and TBK1 kinases. *J. Biol. Chem.* **2002**, 277, 37029-37036, doi:10.1074/jbc.M205069200.
2. Moreno R, Sobotzik JM, Schultz C, Schmitz ML. Specification of the NF-kappaB transcriptional response by p65 phosphorylation and TNF-induced nuclear translocation of IKK epsilon. *Nucleic Acids Res.* **2010**, 38, 6029-6044, doi:10.1093/nar/gkq439.
3. Lamothe B, Besse A, Campos AD, Webster WK, Wu H, Darnay BG. Site-specific Lys-63-linked tumor necrosis factor receptor-associated factor 6 auto-ubiquitination is a critical determinant of I kappa B kinase activation. *J. Biol. Chem.* **2007**, 282, 4102-4112, doi:10.1074/jbc.M609503200.
4. Choudhury AD, Xu H, Baer R. Ubiquitination and proteasomal degradation of the BRCA1 tumor suppressor is regulated during cell cycle progression. *J. Biol. Chem.* **2004**; 279, 33909-33918, doi:10.1074/jbc.M403646200.
