# Supplementary material for: TRAF6 Phosphorylation Prevents Its Autophagic Degradation and Re-Shapes LPS-Triggered Signaling Networks
Source: Cancers (Basel). 2021 Jul 19;13(14):3618. doi: 10.3390/cancers13143618 (PMC8303406; doi:10.3390/cancers13143618)
Supplement: Supplementary file 1 [file cancers-13-03618-s001.zip › Suppl. Table 2-regulated_P_peptides.xlsx]

## Sheet: all_regulated peptides
T: Protein	T: Gene names	Sverweis	Sverweis	T: Phospho (STY) Probabilities	N: wt -	N: wt + LPS	N: Student's T-test Difference wt + LPS_wt -	N: -Log Student's T-test p-value wt + LPS_wt -	Labelling	counts	for graph 1	T: Protein	T: Gene names	SVerweis		T: Phospho (STY) Probabilities	N: P-mut -	N: P-mut + LPS	N: Student's T-test Difference P-mut + LPS_P-mut -	N: -Log Student's T-test p-value P-mut + LPS_P-mut -	Labelling	counts	for graph 1	T: Protein	T: Gene names	SVerweis		T: Phospho (STY) Probabilities	N: P-mim -	N: P-mim + LPS	N: Student's T-test Difference P-mim + LPS_P-mim -	N: -Log Student's T-test p-value P-mim + LPS_P-mim -	Labelling	counts	for graph 1	T: Protein	T: Gene names	SVerweis		T: Phospho (STY) Probabilities	N: C70A -	N: C70A + LPS	N: Student's T-test Difference C70A + LPS_C70A -	N: -Log Student's T-test p-value C70A + LPS_C70A -	Labelling	counts	for graph 1	T: Protein	T: Gene names
A0A024QZ45	BRIP1	wt(166)	#N/A	INSFS(1)PQKPPGHCSR	-0.905284	NaN	NaN	0	LPS down (untreated only)	1		A0A024R1U0	RANGAP1	P-mut(34)	#N/A	ILDPNTGEPAPVLS(0.03)S(0.969)PPPADVSTFLAFPSPEK	0.547532	NaN	NaN	0	LPS down (untreated only)	1		A0A024QZ75	THRAP1;MED13	P-mim(51)	#N/A	IEVDEGFCS(1)PKPSEIK	-1.24129	NaN	NaN	0	LPS down (untreated only)	1		A0A024QZ75	THRAP1;MED13	C70A(182)	#N/A	IEVDEGFCS(1)PKPSEIK	-0.974901	NaN	NaN	0	LPS down (untreated only)	1		A0A024QZ45	BRIP1
A0A024R7T3	HNRPF;HNRNPF	wt(166)	wt+LPS(162)	HSGPNS(1)ADSANDGFVR	-2.14082	NaN	NaN	0	LPS down (untreated only)	2		A0A024R821	EIF3S9;EIF3B	P-mut(34)	P-mut(86)	ALENGDADEPS(1)FS(1)DPEDFVDDVSEEELLGDVLK	0.62328	NaN	NaN	0	LPS down (untreated only)	2		A0A024R3T8	PARP1	P-mim(51)	#N/A	NREELGFRPEYSAS(1)QLK	-1.08153	NaN	NaN	0	LPS down (untreated only)	2		A0A024QZN4	VCL;HEL114	C70A(182)	C70A(225)	GWLRDPSAS(1)PGDAGEQAIR	-0.756709	NaN	NaN	0	LPS down (untreated only)	2		A0A024QZ75	THRAP1;MED13
A0A024R875	GAPVD1	wt(166)	wt+LPS(162)	SSSLEMTPYNT(0.001)PQLS(0.998)PATTPANKK	-0.247703	NaN	NaN	0	LPS down (untreated only)	3		A0A0U1RRM6	ENAH	#N/A	#N/A	T(0.006)NT(0.991)MNGS(0.061)KS(0.942)PVISRPK	-1.76879	NaN	NaN	0	LPS down (untreated only)	3		A0A024RBE7	TMPO	#N/A	P-mim(154)	GGPLQALT(0.001)RES(0.985)T(0.014)R	-0.572606	NaN	NaN	0	LPS down (untreated only)	3		A0A024R0C7	CTTNBP2NL;DKFZp547A023	#N/A	#N/A	FQS(0.001)QADQDQQAS(0.007)GLQS(0.989)PPS(0.003)RDLSPTLIDNSAAK	0.0464692	NaN	NaN	0	LPS down (untreated only)	3		A0A024R563	PPP1R14B
A0A024R8B6	NUP214;DKFZp686J0330	#N/A	wt+LPS(162)	T(0.836)PS(0.164)IQPSLLPHAAPFAK	-0.837939	NaN	NaN	0	LPS down (untreated only)	4		A0A087WXM6	RPL17;hCG_24487;RPL17-C18orf32	P-mut(34)	P-mut(86)	INPYMS(0.007)S(0.993)PCHIEMILTEK	-0.517601	NaN	NaN	0	LPS down (untreated only)	4		A0A024R8A9	USP20	P-mim(51)	P-mim(154)	AVPIAVADEGES(1)ES(1)EDDDLKPR	-0.718252	NaN	NaN	0	LPS down (untreated only)	4		A0A024R1U0	RANGAP1	C70A(182)	#N/A	ILDPNTGEPAPVLS(0.03)S(0.969)PPPADVSTFLAFPSPEK	-0.411687	NaN	NaN	0	LPS down (untreated only)	4		M0QZK6	MVB12A;LOC93343
A0A024R8R6	CDR2L	wt(166)	wt+LPS(162)	LHS(0.01)S(0.986)S(0.004)LELGPRPLEQENER	-0.540363	NaN	NaN	0	LPS down (untreated only)	5		F8WA39	MTMR1	#N/A	#N/A	AAGGAT(0.028)AGS(0.97)RQPS(0.969)VET(0.032)LDSPTGSHVEWCK	-0.0547724	NaN	NaN	0	LPS down (untreated only)	5		B4DSQ6	MED24	#N/A	P-mim(154)	LLSSNEDDANILSS(1)PTDR	-0.95816	NaN	NaN	0	LPS down (untreated only)	5		A0A024R8B6	NUP214;DKFZp686J0330	#N/A	#N/A	T(0.836)PS(0.164)IQPSLLPHAAPFAK	-0.043043	NaN	NaN	0	LPS down (untreated only)	5		A0A024RAM4	MAP1B;DKFZp686F1345
A0A024RBE7	TMPO	wt(166)	wt+LPS(162)	GGPLQALT(0.001)RES(0.985)T(0.014)R	-1.11977	NaN	NaN	0	LPS down (untreated only)	6		J3KP15	SRSF2;SFRS2	#N/A	P-mut(86)	S(1)YGRPPPDVEGMTSLK	-0.23989	NaN	NaN	0	LPS down (untreated only)	6		A0A0A0MRL6	ABLIM1	P-mim(51)	P-mim(154)	MDRGVS(1)MPNMLEPK	-0.861725	NaN	NaN	0	LPS down (untreated only)	6		A0A024R9Y3	HUWE1	C70A(182)	C70A(225)	AQCETLS(1)PDGLPEEQPQTTK	-0.723693	NaN	NaN	0	LPS down (untreated only)	6		Q05CT8	NEDD1
A0A087WVZ6	ZMYND8;DKFZp564P1772	#N/A	wt+LPS(162)	SPMSTNSSVHTGS(1)DVEQDAEK	-0.281621	NaN	NaN	0	LPS down (untreated only)	7		O94804	STK10	#N/A	#N/A	QVAEQGGDLS(1)PAANR	-0.553481	NaN	NaN	0	LPS down (untreated only)	7		A0A0F7NGI8	LRRFIP1	P-mim(51)	P-mim(154)	IDGAT(0.001)QS(0.008)S(0.991)PAEPK	-2.44533	NaN	NaN	0	LPS down (untreated only)	7		A0A024RAM4	MAP1B;DKFZp686F1345	C70A(182)	#N/A	VSAEAEVAPVS(0.997)PEVT(0.01)QEVVEEHCAS(0.993)PEDK	-0.175924	NaN	NaN	0	LPS down (untreated only)	7		A0A024RBE7	TMPO
A0A087X0X3	HNRNPM;ORF;HNRPM	wt(166)	wt+LPS(162)	GNFGGS(1)FAGSFGGAGGHAPGVAR	-0.143545	NaN	NaN	0	LPS down (untreated only)	8		A0A1U9XBE3	MDC1	P-mut(34)	#N/A	VILERDTQRGEPEGGS(1)QDQK	0.0171725	NaN	NaN	0	LPS down (untreated only)	8		A0A0G2JPP5	SCRIB	P-mim(51)	P-mim(154)	S(1)LEQDALRAQMVLSR	-0.818628	NaN	NaN	0	LPS down (untreated only)	8		A0A024RAM4	MAP1B;DKFZp686F1345	C70A(182)	C70A(225)	DYNASAST(0.004)IS(0.98)PPS(0.015)S(0.001)MEEDK	-0.14819	NaN	NaN	0	LPS down (untreated only)	8		A0A024RDJ4	NFKB1
A0A0B4J1S8	PI4KB	#N/A	#N/A	KRELPSLSPAPDT(0.022)GLS(0.917)PS(0.061)K	-0.438341	NaN	NaN	0	LPS down (untreated only)	9		A1L3A9	TBC1D9B	P-mut(34)	#N/A	ASVVDPSTESSPAPQEGSEQPAS(0.015)PAS(0.971)PLS(0.007)S(0.007)R	-0.217255	NaN	NaN	0	LPS down (untreated only)	9		A0A0G2JPP5	SCRIB	P-mim(51)	P-mim(154)	ALAAVPSAGSVQRVPS(1)GAAGGK	-0.506559	NaN	NaN	0	LPS down (untreated only)	9		A0A024RAM4	MAP1B;DKFZp686F1345	C70A(182)	C70A(225)	TATCHSS(0.004)S(0.004)S(0.992)PPIDAASAEPYGFR	2.22112	NaN	NaN	0	LPS down (untreated only)	9		A0A087WSV0	BCL2L12
A0A0C4DGS9	CEPT1	wt(166)	#N/A	RCGDSHPES(1)PVGFGHMSTTGCVLNK	-1.30868	NaN	NaN	0	LPS down (untreated only)	10		Q9H3U1	UNC45A	#N/A	P-mut(86)	T(0.286)VS(0.423)GPGT(0.291)PEPRPAT(0.99)PGAS(0.002)S(0.008)VEQLRK	2.32723	NaN	NaN	0	LPS down (untreated only)	10		E9PJA7	BCLAF1	#N/A	P-mim(154)	FLKS(1)PPLHK	-1.57917	NaN	NaN	0	LPS down (untreated only)	10		A0A024RAM4	MAP1B;DKFZp686F1345	C70A(182)	C70A(225)	RES(1)VAS(1)GDDRAEEDMDEAIEK	0.864002	NaN	NaN	0	LPS down (untreated only)	10		A0A087WYY3	ATP13A3
A0A0G2JPP5	SCRIB	wt(166)	#N/A	MAESPCSPSGQQPPS(1)PPS(1)PDELPANVK	0.682023	NaN	NaN	0	LPS down (untreated only)	11		B3KNT3	SRA1	#N/A	#N/A	APRS(0.001)PPVGS(0.984)GPAS(0.015)GVEPTSFPVESEAR	1.12823	NaN	NaN	0	LPS down (untreated only)	11		F8WA39	MTMR1	#N/A	#N/A	AAGGAT(0.028)AGS(0.97)RQPS(0.969)VET(0.032)LDSPTGSHVEWCK	-0.646812	NaN	NaN	0	LPS down (untreated only)	11		A0A087WWP4	RBM15	#N/A	C70A(225)	VGAGAGAAPFREVDEIS(1)PEDDQRANR	-1.01538	NaN	NaN	0	LPS down (untreated only)	11		A0A0A0MQY0	PDLIM3
A0A0U1RRM6	ENAH	wt(166)	#N/A	T(0.006)NT(0.991)MNGS(0.061)KS(0.942)PVISRPK	-0.739875	NaN	NaN	0	LPS down (untreated only)	12		B3KQ08	CCNL2	P-mut(34)	#N/A	AKADS(1)PVNGLPK	-0.452307	NaN	NaN	0	LPS down (untreated only)	12		H7C053	PQBP1	#N/A	P-mim(154)	TGADTTAAGPLFQQRPY(0.066)PS(0.934)PGAVLR	-0.749716	NaN	NaN	0	LPS down (untreated only)	12		A0A087X2D8	SPAG9	#N/A	#N/A	SHTSLKDELSDVSQGGS(1)K	-0.869606	NaN	NaN	0	LPS down (untreated only)	12		A0A0A0MRA8	EPB41L3
A0A1B0GV47	KIF21A	#N/A	wt+LPS(162)	HS(0.001)DS(0.001)GT(0.001)S(0.001)EAS(0.03)LS(0.965)PPS(0.542)S(0.458)PPS(0.001)RPR	-0.548204	NaN	NaN	0	LPS down (untreated only)	13		B3KTH8	POU3F2	P-mut(34)	#N/A	WLEEADSSS(0.001)GS(0.998)PTSIDK	-0.843653	NaN	NaN	0	LPS down (untreated only)	13		A0A140VK53	SRRM2;KIAA0324	P-mim(51)	P-mim(154)	EAVREGRPPEPT(1)PAK	0.0870816	NaN	NaN	0	LPS down (untreated only)	13		A0A0C4DGG1	PACSIN3	#N/A	#N/A	GGRS(1)PDEVTLTSIVPTR	-2.06949	NaN	NaN	0	LPS down (untreated only)	13		A0A0A0MRL6	ABLIM1
A0A1W2PRB5	KIAA1267;KANSL1	#N/A	wt+LPS(162)	TFPLAHS(1)PQAECEDQLDAQER	-1.01751	NaN	NaN	0	LPS down (untreated only)	14		R4SCP5	EGLN1	#N/A	P-mut(86)	AKPPADPAAAAS(1)PCR	-0.318991	NaN	NaN	0	LPS down (untreated only)	14		P27824	CANX	#N/A	P-mim(154)	SDAEEDGGT(0.003)VS(0.997)QEEEDRKPK	-0.681251	NaN	NaN	0	LPS down (untreated only)	14		A0A0S2Z4Z0	RBM14	C70A(182)	#N/A	LS(0.001)ESQLSFRRS(0.998)PT(0.001)K	4.85111	NaN	NaN	0	LPS down (untreated only)	14		A0A0C4DGP8	CEP89
A8K5Q1	MEPCE	wt(166)	wt+LPS(162)	DITDPLSLNTCTDEGHVVLAS(1)PLK	-0.263126	NaN	NaN	0	LPS down (untreated only)	15		I3L2J0	CIC	P-mut(34)	P-mut(86)	ACTGLSGPGSGSKS(0.999)PPATR	-0.0706961	NaN	NaN	0	LPS down (untreated only)	15		A0A1U9X609	ABCF1	P-mim(51)	P-mim(154)	QQPPEPEWIGDGEST(0.001)S(0.998)PSDK	0.594936	NaN	NaN	0	LPS down (untreated only)	15		A0A1B0GV47	KIF21A	#N/A	C70A(225)	HS(0.001)DS(0.001)GT(0.001)S(0.001)EAS(0.03)LS(0.965)PPS(0.542)S(0.458)PPS(0.001)RPR	-0.35874	NaN	NaN	0	LPS down (untreated only)	15		A0A0F7NGI8	LRRFIP1
B3KXG0		wt(166)	#N/A	RRS(1)IPQPHQLLGR	-0.760607	NaN	NaN	0	LPS down (untreated only)	16		P11388	TOP2A	P-mut(34)	P-mut(86)	GS(0.001)VPLS(0.047)S(0.9)S(0.04)PPAT(0.012)HFPDETEITNPVPKK	3.56328	NaN	NaN	0	LPS down (untreated only)	16		A1L3A9	TBC1D9B	P-mim(51)	#N/A	ASVVDPSTESSPAPQEGSEQPAS(0.015)PAS(0.971)PLS(0.007)S(0.007)R	-0.679539	NaN	NaN	0	LPS down (untreated only)	16		A0A1B0GW05		C70A(182)	C70A(225)	GASDVGAGEPGPERAPLS(1)PGRK	-0.477971	NaN	NaN	0	LPS down (untreated only)	16		A0A0G2JMZ8	OCLN
B4DFV1	PRKCD	wt(166)	wt+LPS(162)	LLAEALNQVTQRAS(1)R	-0.859429	NaN	NaN	0	LPS down (untreated only)	17		P35251	RFC1;LLDBP	#N/A	#N/A	ELS(1)QNTDESGLNDEAIAK	-0.647958	NaN	NaN	0	LPS down (untreated only)	17		Q09666	AHNAK	#N/A	P-mim(154)	LQGSGVSLAS(1)KK	-0.405157	NaN	NaN	0	LPS down (untreated only)	17		A0A1W2PRB5	KIAA1267;KANSL1	#N/A	C70A(225)	TFPLAHS(1)PQAECEDQLDAQER	-0.658673	NaN	NaN	0	LPS down (untreated only)	17		A0A0G2JPP5	SCRIB
B4DLM0	DKFZp781C0423;RBM39	wt(166)	#N/A	IGLPHS(1)IK	-0.132825	NaN	NaN	0	LPS down (untreated only)	18		Q03164	KMT2A	P-mut(34)	P-mut(86)	NSSTPGLQVPVS(0.98)PT(0.02)VPIQNQK	-1.30069	NaN	NaN	0	LPS down (untreated only)	18		Q5JSZ5	PRRC2B	#N/A	#N/A	VKRS(1)PDEALPGGLSGCSSGSGHSPYALER	-0.264945	NaN	NaN	0	LPS down (untreated only)	18		A4LAA3	ATRX	C70A(182)	C70A(225)	IKPVT(0.002)ENLVLS(0.003)S(0.006)HT(0.012)GFCQS(0.982)S(0.989)GDEALS(0.007)K	0.198154	NaN	NaN	0	LPS down (untreated only)	18		Q96DV6	RPS6
B4DSQ6	MED24	wt(166)	wt+LPS(162)	LLSSNEDDANILSS(1)PTDR	-0.845091	NaN	NaN	0	LPS down (untreated only)	19		Q0MQR4	PARG	P-mut(34)	P-mut(86)	LENVSQLSLDKS(1)PTEK	0.731408	NaN	NaN	0	LPS down (untreated only)	19		Q96N67	DOCK7	#N/A	P-mim(154)	SLSNS(0.999)NPDISGT(0.971)PT(0.021)S(0.007)PDDEVR	-0.750242	NaN	NaN	0	LPS down (untreated only)	19		A4LAA3	ATRX	C70A(182)	C70A(225)	IKPVT(0.002)ENLVLS(0.003)S(0.006)HT(0.012)GFCQS(0.982)S(0.989)GDEALS(0.007)K	0.198154	NaN	NaN	0	LPS down (untreated only)	19		Q1XBU8	PIAS1
B7Z7U0	SRRM1	wt(166)	wt+LPS(162)	SRVS(1)VS(0.335)PGRT(0.673)S(0.989)VT(0.003)K	0.424166	NaN	NaN	0	LPS down (untreated only)	20		Q14204	DYNC1H1	P-mut(34)	#N/A	TRT(0.003)DS(0.026)T(0.923)S(0.048)DGRPAWMR	-0.15558	NaN	NaN	0	LPS down (untreated only)	20		A8KAE0	WDHD1	P-mim(51)	P-mim(154)	SHILEDDENS(1)VDISMLK	-0.664768	NaN	NaN	0	LPS down (untreated only)	20		A6ND36	FAM83G	C70A(182)	C70A(225)	AFS(1)QVQCLDDNHVNWR	-2.06466	NaN	NaN	0	LPS down (untreated only)	20		F8WDU9	GGCX
D3DPU2	CAP1	wt(166)	#N/A	AVGRLEAVSHTSDMHRGY(0.002)ADS(0.942)PS(0.056)K	0.37865	NaN	NaN	0	LPS down (untreated only)	21		A0A140VK53	SRRM2	#N/A	P-mut(86)	SRS(1)VS(1)PCSNVESR	0.987038	NaN	NaN	0	LPS down (untreated only)	21		B2R7D3	REPS1	P-mim(51)	P-mim(154)	RQS(0.998)S(0.001)S(0.001)YDDPWK	-0.32699	NaN	NaN	0	LPS down (untreated only)	21		A8MY87	KSR1	C70A(182)	#N/A	ADVLEAHEAEAEEPEAGKS(1)EAEDDEDEVDDLPSSR	0.0272165	NaN	NaN	0	LPS down (untreated only)	21		Q5U0N1	MLF2
E3UVQ2	BCOR-RARA;BCOR	wt(166)	wt+LPS(162)	ET(0.003)LS(0.997)PPGNGCAIYR	-0.758022	NaN	NaN	0	LPS down (untreated only)	22		Q5T4S7	ZUBR1;UBR4	P-mut(34)	#N/A	HVTLPS(0.862)S(0.137)PR	-0.0466906	NaN	NaN	0	LPS down (untreated only)	22		B3KN10	SEC23IP	#N/A	#N/A	VVES(1)PDFSKDEDYLGK	-0.787601	NaN	NaN	0	LPS down (untreated only)	22		A9CQZ8	TJP1;DKFZp686A1195;DKFZp686M05161	C70A(182)	#N/A	AIPVS(0.032)PS(0.968)AVEEDEDEDGHTVVATAR	-1.09811	NaN	NaN	0	LPS down (untreated only)	22		A8K940	MAP1S
E7EPN9	PRRC2C	wt(166)	#N/A	STT(1)PTSSPFR	-1.18095	NaN	NaN	0	LPS down (untreated only)	23		Q6P5Z9	CLIP1;RSN	P-mut(34)	#N/A	RS(0.019)PS(0.975)AS(0.004)S(0.002)LSSMSSVASSVSSRPSR	-1.15888	NaN	NaN	0	LPS down (untreated only)	23		B3KQ08	CCNL2	P-mim(51)	#N/A	AKADS(1)PVNGLPK	-0.887724	NaN	NaN	0	LPS down (untreated only)	23		B0QY53	CBY1;hCG_2010808	C70A(182)	C70A(225)	S(0.006)AS(0.993)LS(0.001)NLHSLDR	-0.956779	NaN	NaN	0	LPS down (untreated only)	23		A8KAH1	PTDSS1
E9PFN4	SLC4A7	wt(166)	wt+LPS(162)	AVYIGVHVPFS(0.005)KES(0.995)R	-0.834311	NaN	NaN	0	LPS down (untreated only)	24		Q8N1H4	TRA2B;DKFZp686F18120	P-mut(34)	P-mut(86)	HSHSHS(0.996)PMS(0.002)T(0.002)R	-4.6621	NaN	NaN	0	LPS down (untreated only)	24		S4R3H4	ACIN1	#N/A	P-mim(154)	S(0.858)KS(0.142)PS(0.98)PPRLT(0.02)EDR	0.983902	NaN	NaN	0	LPS down (untreated only)	24		B2RA70	YES1	C70A(182)	#N/A	YRPENTPEPVSTSVSHYGAEPT(0.027)T(0.196)VS(0.778)PCPS(0.803)S(0.105)S(0.091)AK	-0.164578	NaN	NaN	0	LPS down (untreated only)	24		A8KAQ6	AUP1;DKFZp686P12272
E9PJA7	BCLAF1	wt(166)	wt+LPS(162)	FLKS(1)PPLHK	-1.84734	NaN	NaN	0	LPS down (untreated only)	25		Q8N5I9	C12orf45	P-mut(34)	P-mut(86)	AS(0.018)PS(0.018)CS(0.947)S(0.016)PTRDSSGVPVSK	2.5996	NaN	NaN	0	LPS down (untreated only)	25		C9J0I9	ZC3HC1	#N/A	#N/A	SWDS(0.01)S(0.045)S(0.944)PVDRPEPEAASPTTR	-1.3098	NaN	NaN	0	LPS down (untreated only)	25		B3KMW2	USP36	C70A(182)	C70A(225)	HSCSPMGDGDPEAMEES(1)PRKK	-0.51979	NaN	NaN	0	LPS down (untreated only)	25		B2R636	USP1
F8WA39	MTMR1	wt(166)	#N/A	AAGGAT(0.028)AGS(0.97)RQPS(0.969)VET(0.032)LDSPTGSHVEWCK	-0.09747	NaN	NaN	0	LPS down (untreated only)	26		Q8TB72	PUM2	P-mut(34)	#N/A	DFNRT(0.002)PGS(0.997)RQAS(0.915)PT(0.085)EVVER	0.230969	NaN	NaN	0	LPS down (untreated only)	26		D6W5A2	MTA3;tmp_locus_6	#N/A	#N/A	MPT(0.067)QS(0.932)EEEKLS(0.002)PS(0.251)PT(0.407)T(0.341)EDPRVR	-0.897069	NaN	NaN	0	LPS down (untreated only)	26		B3KN10	SEC23IP	#N/A	#N/A	VVES(1)PDFSKDEDYLGK	-1.2301	NaN	NaN	0	LPS down (untreated only)	26		I3L2J8	CEP131;AZI1
H0YB67	DROSHA;RNASEN	wt(166)	wt+LPS(162)	NTDSWAPPLEIVNHRS(0.258)PS(0.742)REK	-0.392996	NaN	NaN	0	LPS down (untreated only)	27		Q5U0A0	PSMA5	#N/A	#N/A	RIT(0.081)S(0.918)PLMEPS(0.001)SIEK	0.409579	NaN	NaN	0	LPS down (untreated only)	27		E9PMS6	LMO7	P-mim(51)	P-mim(154)	ATLSSTSGLDLMSESGEGEIS(0.997)PQREVS(0.003)R	-0.427211	NaN	NaN	0	LPS down (untreated only)	27		B3KTH8	POU3F2	C70A(182)	#N/A	WLEEADSSS(0.001)GS(0.998)PTSIDK	-0.461907	NaN	NaN	0	LPS down (untreated only)	27		B2RNB2	ADAM17
H7C053	PQBP1	wt(166)	wt+LPS(162)	TGADTTAAGPLFQQRPY(0.066)PS(0.934)PGAVLR	-0.388235	NaN	NaN	0	LPS down (untreated only)	28		Q9H6F5	CCDC86	#N/A	P-mut(86)	APGS(0.998)PRGQHEPS(0.002)KPPPAGETVTGGFGAK	3.37559	NaN	NaN	0	LPS down (untreated only)	28		O60885	BRD4	P-mim(51)	P-mim(154)	MPDEPEEPVVAVS(0.059)S(0.941)PAVPPPTK	-0.626258	NaN	NaN	0	LPS down (untreated only)	28		B3KVJ8	CLCN7	C70A(182)	C70A(225)	VGHMS(0.798)S(0.202)VELDDELLDPDMDPPHPFPK	0.00223095	NaN	NaN	0	LPS down (untreated only)	28		B3KQ08	CCNL2
O43491	EPB41L2	wt(166)	wt+LPS(162)	KNS(1)LRVEGDNIYVR	-1.01043	NaN	NaN	0	LPS down (untreated only)	29		Q9H116	GZF1	P-mut(34)	#N/A	TAEGDVGDY(0.002)RCPQDQS(0.997)PDRVGT(0.001)EMEQVSK	-0.0126393	NaN	NaN	0	LPS down (untreated only)	29		P42345	MTOR	P-mim(51)	P-mim(154)	T(0.011)RT(0.011)DS(0.934)Y(0.002)S(0.04)AGQS(0.001)VEILDGVELGEPAHK	-1.01596	NaN	NaN	0	LPS down (untreated only)	29		B3KX07	FAM122A	C70A(182)	C70A(225)	RS(0.907)NS(0.093)APLIHGLSDTSPVFQAEAPSAR	-0.107317	NaN	NaN	0	LPS down (untreated only)	29		B3KXA1	AEBP2
O94804	STK10	wt(166)	#N/A	QVAEQGGDLS(1)PAANR	-0.363459	NaN	NaN	0	LPS down (untreated only)	30		Q9HAW0	BRF2	#N/A	#N/A	RICPVPPVS(0.005)T(0.005)VT(0.013)GDENIS(0.967)DS(0.01)EIEQYLRTPQEVR	-0.830498	NaN	NaN	0	LPS down (untreated only)	30		Q13177	PAK2	P-mim(51)	P-mim(154)	GT(0.01)EAPAVVT(0.99)EEEDDDEETAPPVIAPRPDHTK	-0.685341	NaN	NaN	0	LPS down (untreated only)	30		B3KX07	FAM122A	C70A(182)	C70A(225)	RS(0.016)NS(0.984)APLIHGLSDTSPVFQAEAPSAR	-0.107317	NaN	NaN	0	LPS down (untreated only)	30		B3KXA1	AEBP2
O95251	KAT7	#N/A	#N/A	LSQSS(0.001)QDS(0.604)S(0.393)PVRNLQS(0.002)FGTEEPAYSTRR	1.55079	NaN	NaN	0	LPS down (untreated only)	31		Q9NQG5	RPRD1B	P-mut(34)	P-mut(86)	LSMEDS(0.994)KS(0.006)PPPK	1.2782	NaN	NaN	0	LPS down (untreated only)	31		A0A0G2JNZ2	SCRIB	#N/A	#N/A	LAEAPS(0.001)PAPT(0.01)PS(0.031)PT(0.034)PVEDLGPQT(0.237)S(0.237)T(0.237)S(0.237)PGRLS(0.977)PDFAEELR	1.32274	NaN	NaN	0	LPS down (untreated only)	31		B4DDM8	ADAM9	C70A(182)	C70A(225)	HVS(1)PVT(1)PPREVPIYANR	-0.718042	NaN	NaN	0	LPS down (untreated only)	31		G8JLH9	STAT3
P05412	JUN	#N/A	wt+LPS(162)	AKNS(1)DLLTSPDVGLLK	-0.755544	NaN	NaN	0	LPS down (untreated only)	32		Q9Y248	GINS2	P-mut(34)	#N/A	LRTNLQPLESTQS(1)QDF	-1.11733	NaN	NaN	0	LPS down (untreated only)	32		Q53GG0	LIMA1	P-mim(51)	P-mim(154)	EGHSLEMENENLVENGADS(0.999)DEDDNS(0.001)FLK	-1.0043	NaN	NaN	0	LPS down (untreated only)	32		B4DGE7	FLJ20323;MIOS	C70A(182)	C70A(225)	GFSQYGVSGS(1)PTK	-0.189253	NaN	NaN	0	LPS down (untreated only)	32		B4DYY5	UBAP2L
P22626	HNRNPA2B1;HNRPA2B1	wt(166)	wt+LPS(162)	S(0.02)GNFGGS(0.971)RNMGGPY(0.008)GGGNYGPGGS(0.001)GGSGGYGGR	0.0304083	NaN	NaN	0	LPS down (untreated only)	33		A0A024R3E4	YAP1;DKFZp451O0517	#N/A	P-mut(86)	SQLPTLEQDGGTQNPVS(0.005)S(0.994)PGMS(0.001)QELR	NaN	-0.697978	NaN	0	LPS up (LPS only)	1		Q53HB9	DDX56	#N/A	#N/A	SQNPLRS(1)FK	-0.469204	NaN	NaN	0	LPS down (untreated only)	33		B4E0B7	NCAPD2	C70A(182)	C70A(225)	ELEIGQAGSQRAPS(1)AK	-0.443145	NaN	NaN	0	LPS down (untreated only)	33		B4E0B7	NCAPD2
P27824	CANX	wt(166)	#N/A	SDAEEDGGT(0.003)VS(0.997)QEEEDRKPK	-0.397342	NaN	NaN	0	LPS down (untreated only)	34		A0A024R8R6	CDR2L	#N/A	P-mut(86)	LHS(0.01)S(0.986)S(0.004)LELGPRPLEQENER	NaN	-0.636788	NaN	0	LPS up (LPS only)	2		Q59FW1	MTA1	P-mim(51)	#N/A	AECTARLPEASQS(1)PLVLK	-1.31414	NaN	NaN	0	LPS down (untreated only)	34		B7Z687	ROBO1	C70A(182)	#N/A	KVPS(1)FTFTPTVTYQR	-1.05662	NaN	NaN	0	LPS down (untreated only)	34		B7Z607	PROSER1
P35251	RFC1;LLDBP	#N/A	wt+LPS(162)	ELS(1)QNTDESGLNDEAIAK	-1.60562	NaN	NaN	0	LPS down (untreated only)	35		A0A024R5M3	CTTN	P-mut+LPS(81)	P-mut(86)	LPS(0.002)S(0.998)PVYEDAASFK	NaN	4.07002	NaN	0	LPS up (LPS only)	3		Q5T481	RBM20	P-mim(51)	P-mim(154)	GVESSDVHPAPTVQQMS(0.84)S(0.16)PKPAEER	0.583747	NaN	NaN	0	LPS down (untreated only)	35		B7ZAQ5	POLD3	C70A(182)	C70A(225)	RVALS(1)DDETK	0.0201229	NaN	NaN	0	LPS down (untreated only)	35		W6CJ52	FOXC1
P37802	TAGLN3;TAGLN2	wt(166)	#N/A	GAS(1)QAGMTGYGMPR	-1.09635	NaN	NaN	0	LPS down (untreated only)	36		A0A024RAC6	TCEB3	#N/A	#N/A	AFS(0.936)S(0.064)PQEEEEAGFTGR	NaN	-0.137238	NaN	0	LPS up (LPS only)	4		Q6PJT7	ZC3H14;FLJ11806	#N/A	#N/A	T(0.016)PRIS(0.984)PPIKEEETK	-0.692369	NaN	NaN	0	LPS down (untreated only)	36		D3DUP2	WNK1	C70A(182)	#N/A	EKPELS(0.004)EPS(0.033)HLNGPS(0.861)S(0.102)DPEAAFLS(0.001)R	0.0212806	NaN	NaN	0	LPS down (untreated only)	36		W6CJ52	FOXC1
P42677	RPS27;RPS27L;LOC392748	wt(166)	wt+LPS(162)	LTEGCS(1)FR	-0.150203	NaN	NaN	0	LPS down (untreated only)	37		A0A0S2Z4Z0	RBM14	#N/A	#N/A	AQPS(0.001)AS(0.998)LGVGY(0.001)R	NaN	-0.83313	NaN	0	LPS up (LPS only)	5		Q86X27	RALGPS2	P-mim(51)	P-mim(154)	SVAAEGALLPQTPPS(1)PR	-0.921027	NaN	NaN	0	LPS down (untreated only)	37		D3DVA5	ARHGEF2	C70A(182)	C70A(225)	ERPSSAIYPS(0.01)DS(0.979)FRQS(0.007)LLGS(0.004)R	-0.166164	NaN	NaN	0	LPS down (untreated only)	37		F8W6G1	NRBP1
P46019	PHKA1;PHKA2	wt(166)	#N/A	S(0.002)RS(0.917)NS(0.08)GVRLDGY(0.001)AR	1.56106	NaN	NaN	0	LPS down (untreated only)	38		A4FUT8	JMJD1B;KDM3B	#N/A	#N/A	S(0.001)LLNART(0.999)PENHENLFLQPPK	NaN	-0.0408994	NaN	0	LPS up (LPS only)	6		Q9BU76	MMTAG2	P-mim(51)	#N/A	RPAEAT(0.996)S(0.007)S(0.025)PT(0.279)S(0.693)PERPR	0.154201	NaN	NaN	0	LPS down (untreated only)	38		E7EPN9	PRRC2C	C70A(182)	C70A(225)	FLSRSVEDVRPHHT(0.002)DANNQS(0.998)ACFEAPDQK	1.22371	NaN	NaN	0	LPS down (untreated only)	38		D3DPU2	CAP1
Q09666	AHNAK	wt(166)	#N/A	LQGSGVSLAS(1)KK	-0.736234	NaN	NaN	0	LPS down (untreated only)	39		B3KNQ9	HSF1	#N/A	P-mut(86)	GHTDTEGRPPS(1)PPPT(0.913)S(0.028)T(0.059)PEK	NaN	-0.277836	NaN	0	LPS up (LPS only)	7		Q9Y4H2	IRS2	#N/A	P-mim(154)	SRTDSLAAT(1)PPAAK	-0.583221	NaN	NaN	0	LPS down (untreated only)	39		E7ESG2	CLSPN	C70A(182)	C70A(225)	SPS(1)PGLFR	-1.7002	NaN	NaN	0	LPS down (untreated only)	39		F2Z3H0	DNAJC2
Q1XBU8	PIAS1	wt(166)	#N/A	RTCPSLSPTS(1)PLNNK	-0.978266	NaN	NaN	0	LPS down (untreated only)	40		A0A024RBE7	TMPO	P-mut+LPS(81)	#N/A	GPPDFS(0.999)S(0.999)DEEREPT(0.044)PVLGS(0.958)GAAAAGR	NaN	-0.590818	NaN	0	LPS up (LPS only)	8		Q9UBT2	UBA2	P-mim(51)	#N/A	YLFNQLFGEEDADQEVS(1)PDRADPEAAWEPTEAEAR	-0.651512	NaN	NaN	0	LPS down (untreated only)	40		E7EVA0	MAP4	C70A(182)	C70A(225)	KVDLTLLS(1)PK	-1.02548	NaN	NaN	0	LPS down (untreated only)	40		H0YH87	ATXN2
Q27J81	INF2	#N/A	wt+LPS(162)	EHNSMWAS(0.003)LS(0.013)S(0.985)PDAEAVEPDFSSIER	-0.755867	NaN	NaN	0	LPS down (untreated only)	41		B4DVQ5	EIF3C;EIF3CL	#N/A	#N/A	GGYRQQQS(1)QTAY	NaN	-0.0469101	NaN	0	LPS up (LPS only)	9		A0A024R5W0	HERC1	#N/A	P-mim(154)	RVS(0.987)T(0.013)DLPEGQDVYTAACNSVIHR	NaN	-0.938048	NaN	0	LPS up (LPS only)	1		E7EVA0	MAP4	C70A(182)	#N/A	TTTAAAVAS(0.007)T(0.005)GPS(0.017)S(0.01)RS(0.96)PSTLLPK	-0.257461	NaN	NaN	0	LPS down (untreated only)	41		H0YH87	ATXN2
Q53HB9	DDX56	#N/A	#N/A	SQNPLRS(1)FK	-1.46131	NaN	NaN	0	LPS down (untreated only)	42		B9A6K1	TBC1D5	#N/A	#N/A	S(0.001)ES(0.999)MPVQLNK	NaN	-1.73018	NaN	0	LPS up (LPS only)	10		A0A024QZW7	NUP153	P-mim+LPS(133)	#N/A	VQMT(0.006)S(0.977)PS(0.003)S(0.001)T(0.004)GS(0.009)PMFK	NaN	0.780532	NaN	0	LPS up (LPS only)	2		E9PFQ4	PHLDB2;DKFZp686P22161;DKFZp686J162	C70A(182)	C70A(225)	S(1)HDNVYSLGGLEGRK	-0.996946	NaN	NaN	0	LPS down (untreated only)	42		F8W126	MCRS1
Q5VZL5	ZMYM4	wt(166)	#N/A	DFSLVRENSKET(1)FSGK	-0.371245	NaN	NaN	0	LPS down (untreated only)	43		A0A0B4J1S8	PI4KB	#N/A	#N/A	KRELPSLSPAPDT(0.022)GLS(0.917)PS(0.061)K	NaN	-0.43456	NaN	0	LPS up (LPS only)	11		A0A024QZW7	NUP153	P-mim+LPS(133)	#N/A	RIPSIVS(0.006)S(0.994)PLNS(0.001)PLDR	NaN	0.200574	NaN	0	LPS up (LPS only)	3		E9PFQ4	PHLDB2;DKFZp313N0632	C70A(182)	C70A(225)	AHLPLGQS(0.846)NS(0.133)CGS(0.021)VLPPSLAAMAK	-1.73889	NaN	NaN	0	LPS down (untreated only)	43		F8WA39	MTMR1
Q6PJT7	ZC3H14;FLJ11806	#N/A	wt+LPS(162)	T(0.016)PRIS(0.984)PPIKEEETK	-0.819551	NaN	NaN	0	LPS down (untreated only)	44		A0A0C4DGG1	PACSIN3	#N/A	#N/A	GGRS(1)PDEVTLTSIVPTR	NaN	-1.14721	NaN	0	LPS up (LPS only)	12		A0A024QZW7	NUP153	P-mim+LPS(133)	P-mim(154)	RIPS(0.007)IVS(0.555)S(0.438)PLNS(1)PLDR	NaN	0.410545	NaN	0	LPS up (LPS only)	4		E9PQV9	DCUN1D5	C70A(182)	C70A(225)	S(1)PGVAAAVAEDGGLK	-0.913888	NaN	NaN	0	LPS down (untreated only)	44		Q9NWD6	RABL6
Q6ZRV2	FAM83H	#N/A	#N/A	RLS(1)LGQGDSTEAATEER	1.77984	NaN	NaN	0	LPS down (untreated only)	45		A0A0S2Z4G7	NPM1	P-mut+LPS(81)	P-mut(86)	MEDSMDMDMS(1)PLRPQNYLFGCELK	NaN	1.35118	NaN	0	LPS up (LPS only)	13		A0A024R095	CLCC1	P-mim+LPS(133)	P-mim(154)	FQTGNKS(1)PEVLR	NaN	0.58812	NaN	0	LPS up (LPS only)	5		F2Z2E2	IQGAP3	C70A(182)	#N/A	RQACTAQT(1)PEPLRR	-1.02198	NaN	NaN	0	LPS down (untreated only)	45		Q96T23	RSF1
Q7L804	RAB11FIP2	#N/A	wt+LPS(162)	LSSAHS(0.999)MS(0.001)DLSGSHMSSEK	0.552514	NaN	NaN	0	LPS down (untreated only)	46		A0A0S2Z4Z0	RBM14	P-mut+LPS(81)	#N/A	LS(0.001)ESQLSFRRS(0.998)PT(0.001)K	NaN	2.88792	NaN	0	LPS up (LPS only)	14		A0A024R0C7	CTTNBP2NL;DKFZp547A023	#N/A	#N/A	FQS(0.001)QADQDQQAS(0.007)GLQS(0.989)PPS(0.003)RDLSPTLIDNSAAK	NaN	0.26242	NaN	0	LPS up (LPS only)	6		F2Z3H0	DNAJC2	C70A(182)	C70A(225)	NAS(1)AS(1)FQELEDKK	0.197814	NaN	NaN	0	LPS down (untreated only)	46		I3L2J0	CIC
Q8N5I9	C12orf45	wt(166)	wt+LPS(162)	GKIEVLDS(1)PASK	-0.705998	NaN	NaN	0	LPS down (untreated only)	47		A0A0S2Z4Z9	NONO	P-mut+LPS(81)	P-mut(86)	GAMPPAPVPAGTPAPPGPATMMPDGT(0.006)LGLT(0.903)PPT(0.069)T(0.022)ER	NaN	0.0961032	NaN	0	LPS up (LPS only)	15		A0A024R7T3	HNRPF;HNRNPF	#N/A	P-mim(154)	HSGPNS(1)ADSANDGFVR	NaN	-1.56686	NaN	0	LPS up (LPS only)	7		F4ZW66	ILF3	C70A(182)	#N/A	LFPDT(1)PLALDANKK	-1.88899	NaN	NaN	0	LPS down (untreated only)	47		O15085	ARHGEF11
Q8NFC6	BOD1L1	wt(166)	wt+LPS(162)	EDKS(1)PETGTAGGSSTASYSAGR	-0.279631	NaN	NaN	0	LPS down (untreated only)	48		A0A140VJN1	LRRC16A	P-mut+LPS(81)	P-mut(86)	RS(0.001)S(0.999)GFISELPSEEGK	NaN	-0.587476	NaN	0	LPS up (LPS only)	16		A0A024R5M3	CTTN	P-mim+LPS(133)	P-mim(154)	T(0.188)QT(0.812)PPVS(1)PAPQPTEER	NaN	1.46502	NaN	0	LPS up (LPS only)	8		F8W6G1	NRBP1	C70A(182)	C70A(225)	S(1)EGESQTVLSSGSDPK	-0.573812	NaN	NaN	0	LPS down (untreated only)	48		O75940	SMNDC1
Q8WUA4	GTF3C2	wt(166)	#N/A	ADLIPY(0.004)QDS(0.996)PEGPDHSSASSGVPNPPK	-0.40389	NaN	NaN	0	LPS down (untreated only)	49		P05412	JUN	#N/A	#N/A	LIIQSSNGHIT(0.035)T(0.035)T(0.93)PT(0.994)PT(0.006)QFLCPK	NaN	-1.19901	NaN	0	LPS up (LPS only)	17		A0A024R9Y5	FGD1	#N/A	P-mim(154)	LRS(1)DPGPPTETPSQRPSPLK	NaN	-0.00737556	NaN	0	LPS up (LPS only)	9		F8WA39	MTMR1	#N/A	#N/A	AAGGATAGS(0.001)RQPS(0.097)VET(0.894)LDS(0.008)PTGSHVEWCK	1.09507	NaN	NaN	0	LPS down (untreated only)	49		O95251	KAT7
Q96JM3	CHAMP1	wt(166)	wt+LPS(162)	KPS(0.978)GS(0.022)PDLWK	-1.32662	NaN	NaN	0	LPS down (untreated only)	50		A0A140VK53	SRRM2	#N/A	#N/A	SLS(1)GSSPCPK	NaN	-1.31745	NaN	0	LPS up (LPS only)	18		A0A024RAC6	TCEB3	#N/A	#N/A	AFS(0.936)S(0.064)PQEEEEAGFTGR	NaN	-0.147199	NaN	0	LPS up (LPS only)	10		G1UI22	MLLT4	C70A(182)	#N/A	DY(0.002)EPPS(0.963)PS(0.035)PAPGAPPPPPQR	-1.1721	NaN	NaN	0	LPS down (untreated only)	50		O95785	WIZ
Q96N67	DOCK7	wt(166)	#N/A	SLSNS(0.999)NPDISGT(0.971)PT(0.021)S(0.007)PDDEVR	0.32218	NaN	NaN	0	LPS down (untreated only)	51		P55265	ADAR	#N/A	P-mut(86)	TAESQT(1)PTPSATSFFSGK	NaN	-0.16033	NaN	0	LPS up (LPS only)	19		A0A024RAC6	TCEB3	#N/A	P-mim(154)	AFS(0.003)S(0.997)PQEEEEAGFTGR	NaN	-0.147199	NaN	0	LPS up (LPS only)	11		H0YD13	CD44	C70A(182)	C70A(225)	S(1)QEMVHLVNK	-0.569134	NaN	NaN	0	LPS down (untreated only)	51		P05412	JUN
Q96QR8	PURB	#N/A	#N/A	ADGDS(1)GS(1)ERGGGGGPCGFQPASR	0.391506	NaN	NaN	0	LPS down (untreated only)	52		Q5JSZ5	PRRC2B	#N/A	#N/A	VKRS(1)PDEALPGGLSGCSSGSGHSPYALER	NaN	-0.117736	NaN	0	LPS up (LPS only)	20		A0A0S2Z4Z0	RBM14	#N/A	#N/A	AQPS(0.001)AS(0.998)LGVGY(0.001)R	NaN	-0.791255	NaN	0	LPS up (LPS only)	12		I3L2Z9	NEURL4;hCG_42028	#N/A	#N/A	SFPLHS(1)PVAGVAHR	-1.4675	NaN	NaN	0	LPS down (untreated only)	52		P12270	TPR
Q96T23	RSF1	wt(166)	#N/A	LSDDFDS(1)PVK	-0.714239	NaN	NaN	0	LPS down (untreated only)	53		B2R8P9	KLF3	P-mut+LPS(81)	P-mut(86)	RS(0.001)S(0.999)PPSAGNSPSSLK	NaN	-0.373863	NaN	0	LPS up (LPS only)	21		A0A024R8B6	NUP214;DKFZp686J0330	#N/A	#N/A	T(0.836)PS(0.164)IQPSLLPHAAPFAK	NaN	-0.207238	NaN	0	LPS up (LPS only)	13		I6L9C8	ZNF428	C70A(182)	#N/A	AAQPPAQPCQLCGRS(1)PLGEAPPGTPPCR	0.40271	NaN	NaN	0	LPS down (untreated only)	53		P27824	CANX
Q96T58	SPEN	wt(166)	#N/A	HGS(1)FHEDEDPIGS(1)PR	-0.752161	NaN	NaN	0	LPS down (untreated only)	54		Q9ULL5	PRR12	#N/A	P-mut(86)	SHGLEPAAPS(1)PR	NaN	-1.03803	NaN	0	LPS up (LPS only)	22		A0A0U1RRM6	ENAH	#N/A	#N/A	T(0.006)NT(0.991)MNGS(0.061)KS(0.942)PVISRPK	NaN	-0.651295	NaN	0	LPS up (LPS only)	14		J3QRU8	GIT1;DKFZp686G1540	C70A(182)	#N/A	S(0.039)LS(0.912)S(0.049)PTDNLELSLR	-2.1041	NaN	NaN	0	LPS down (untreated only)	54		P28749	RBL1
Q9BYW2	SETD2	wt(166)	wt+LPS(162)	RRS(0.01)S(0.99)LS(0.999)PPS(0.001)S(0.001)AYER	-0.277269	NaN	NaN	0	LPS down (untreated only)	55		B4E1N7	MYC	P-mut+LPS(81)	P-mut(86)	KFELLPT(1)PPLS(0.5)PS(0.5)RR	NaN	-1.87114	NaN	0	LPS up (LPS only)	23		A0A024R8W0	DDX48;EIF4A3	P-mim+LPS(133)	P-mim(154)	ATTATMAT(0.03)S(0.869)GS(0.101)ARK	NaN	1.69069	NaN	0	LPS up (LPS only)	15		K7EQH1	C18orf25;ARKL1	C70A(182)	#N/A	RDS(0.992)S(0.008)ESQLASTESDKPTTGR	0.31737	NaN	NaN	0	LPS down (untreated only)	55		P78310	CXADR
Q9HAW0	BRF2	#N/A	#N/A	RICPVPPVS(0.005)T(0.005)VT(0.013)GDENIS(0.967)DS(0.01)EIEQYLRTPQEVR	-0.62226	NaN	NaN	0	LPS down (untreated only)	56		B5BUB5	SSB	P-mut+LPS(81)	#N/A	T(0.914)KFAS(0.086)DDEHDEHDENGATGPVK	NaN	3.12956	NaN	0	LPS up (LPS only)	24		A0PJH8	ZNHIT2	#N/A	P-mim(154)	GAGPQLLEELDNAPGS(0.003)DAAELELAPART(0.99)PPDS(0.007)VK	NaN	-0.87236	NaN	0	LPS up (LPS only)	16		M0QZK6	MVB12A;LOC93343	C70A(182)	C70A(225)	RNDS(0.999)IY(0.001)EASSLYGISAMDGVPFTLHPR	-0.969881	NaN	NaN	0	LPS down (untreated only)	56		Q01850	CDR2
Q9ULL5	PRR12	wt(166)	wt+LPS(162)	SHGLEPAAPS(1)PR	-1.09078	NaN	NaN	0	LPS down (untreated only)	57		B9EIS5	PCM1	P-mut+LPS(81)	P-mut(86)	RVTNDIS(1)PES(1)S(1)PGVGR	NaN	0.280474	NaN	0	LPS up (LPS only)	25		A4FUT8	JMJD1B;KDM3B	#N/A	#N/A	S(0.001)LLNART(0.999)PENHENLFLQPPK	NaN	-0.286769	NaN	0	LPS up (LPS only)	17		O43347	MSI1	C70A(182)	#N/A	METDAPQPGLAS(1)PDSPHDPCK	-1.22199	NaN	NaN	0	LPS down (untreated only)	57		Q09666	AHNAK
R4SCP5	EGLN1	wt(166)	#N/A	AKPPADPAAAAS(1)PCR	-0.29763	NaN	NaN	0	LPS down (untreated only)	58		E9PNJ4	STIM1	P-mut+LPS(81)	P-mut(86)	DLEGLHRAEQS(1)LHDLQER	NaN	-1.08943	NaN	0	LPS up (LPS only)	26		A0A024RAM4	MAP1B;DKFZp686F1345	P-mim+LPS(133)	#N/A	VSAEAEVAPVS(0.997)PEVT(0.01)QEVVEEHCAS(0.993)PEDK	NaN	-0.867289	NaN	0	LPS up (LPS only)	18		O94804	STK10	C70A(182)	#N/A	ASQSRPNS(0.963)S(0.037)ALETLGGEK	-0.409956	NaN	NaN	0	LPS down (untreated only)	58		X5D7J0	KIF1A
S4R3H4	ACIN1	wt(166)	#N/A	S(0.858)KS(0.142)PS(0.98)PPRLT(0.02)EDR	-0.389538	NaN	NaN	0	LPS down (untreated only)	59		F8WDB4	LRWD1	P-mut+LPS(81)	P-mut(86)	RACAS(0.017)PS(0.983)AQVEGSPVAGSDGSQPAVK	NaN	1.40722	NaN	0	LPS up (LPS only)	27		A0A024RAN2	CAST	P-mim+LPS(133)	P-mim(154)	PIGPDDAIDALSSDFTCGS(0.997)PT(0.003)AAGK	NaN	-0.955138	NaN	0	LPS up (LPS only)	19		O94804	STK10	C70A(182)	C70A(225)	AS(0.158)QS(0.842)RPNS(0.864)S(0.135)ALET(0.001)LGGEK	-0.409956	NaN	NaN	0	LPS down (untreated only)	59		Q12802	AKAP13
V9GYF2	MSTO1;hCG_1997332	wt(166)	#N/A	VAPPYPHLFSSCSPPGMVLDGS(1)PK	-1.35846	NaN	NaN	0	LPS down (untreated only)	60		H0YFN7	RIC1	P-mut+LPS(81)	#N/A	S(0.018)IS(0.972)LS(0.01)QSAENVPASK	NaN	-0.808762	NaN	0	LPS up (LPS only)	28		A0A024RCA7	RPLP1;RPLP2	P-mim+LPS(133)	P-mim(154)	KEES(1)EES(1)DDDMGFGLFD	NaN	-1.21975	NaN	0	LPS up (LPS only)	20		O95251	KAT7	C70A(182)	C70A(225)	LS(0.007)QS(0.007)S(0.021)QDS(0.107)S(0.856)PVRNLQS(0.002)FGTEEPAYSTRR	1.14609	NaN	NaN	0	LPS down (untreated only)	60		Q12802	AKAP13
V9HW58	HEL-S-77;DCTN2	wt(166)	wt+LPS(162)	T(0.04)T(0.04)GT(0.92)PPDSSLVTYELHSRPEQDK	0.543153	NaN	NaN	0	LPS down (untreated only)	61		I6L9C8	ZNF428	P-mut+LPS(81)	#N/A	AAQPPAQPCQLCGRS(1)PLGEAPPGTPPCR	NaN	0.643488	NaN	0	LPS up (LPS only)	29		B4DL80	CDC27	#N/A	P-mim(154)	EVTPILAQTQSSGPQTSTTPQVLS(0.948)PT(0.038)IT(0.011)S(0.003)PPNALPR	NaN	-0.1927	NaN	0	LPS up (LPS only)	21		O95425	DKFZp586H1823;SVIL	C70A(182)	#N/A	SVDYNMPRS(1)PVEMDEDFDVIFDPYAPK	-1.82897	NaN	NaN	0	LPS down (untreated only)	61		Q12802	AKAP13
V9HWE1	HEL113;VIM	wt(166)	wt+LPS(162)	MFGGPGTASRPS(0.009)S(0.956)S(0.035)R	-0.481463	NaN	NaN	0	LPS down (untreated only)	62		J3KPD3	RBM7	P-mut+LPS(81)	#N/A	SFS(0.998)S(0.002)PENFQR	NaN	-1.02832	NaN	0	LPS up (LPS only)	30		A0A087WVZ6	ZMYND8;DKFZp564P1772	P-mim+LPS(133)	P-mim(154)	RIS(1)LSDMPR	NaN	-1.10504	NaN	0	LPS up (LPS only)	22		O95453	PARN	C70A(182)	C70A(225)	RSQANGAGALS(0.001)YVS(0.999)PNTSK	-0.67442	NaN	NaN	0	LPS down (untreated only)	62		Q59GL0	RLF
A0A024R0C7	CTTNBP2NL;DKFZp547A023	#N/A	wt+LPS(162)	FQS(0.001)QADQDQQAS(0.007)GLQS(0.989)PPS(0.003)RDLSPTLIDNSAAK	NaN	0.984904	NaN	0	LPS up (LPS only)	1		L7RSM7	PRKCA	P-mut+LPS(81)	P-mut(86)	STLNPQWNES(1)FTFK	NaN	-1.2002	NaN	0	LPS up (LPS only)	31		B4DVQ5	EIF3C;EIF3CL	#N/A	#N/A	GGYRQQQS(1)QTAY	NaN	0.713498	NaN	0	LPS up (LPS only)	23		P05412	JUN	#N/A	#N/A	LIIQSSNGHIT(0.006)T(0.009)T(0.985)PT(0.965)PT(0.035)QFLCPK	-2.30377	NaN	NaN	0	LPS down (untreated only)	63		Q14807	KIF22;A-328A3.5;OBP-2
A0A024R3E4	YAP1;DKFZp451O0517	wt+LPS(106)	wt+LPS(162)	SQLPTLEQDGGTQNPVS(0.005)S(0.994)PGMS(0.001)QELR	NaN	-0.185329	NaN	0	LPS up (LPS only)	2		O00567	NOP56	P-mut+LPS(81)	#N/A	S(0.01)FS(0.01)KEELMS(0.391)S(0.592)DLEET(0.99)AGS(0.005)T(0.002)S(0.001)IPK	NaN	0.0745367	NaN	0	LPS up (LPS only)	32		A0A087X2D8	SPAG9	#N/A	#N/A	SHTSLKDELSDVSQGGS(1)K	NaN	0.265683	NaN	0	LPS up (LPS only)	24		P10244	MYBL2	#N/A	#N/A	SS(0.001)RGELIPIS(0.995)PS(0.003)TEVGGSGIGTPPSVLK	-1.91638	NaN	NaN	0	LPS down (untreated only)	64		Q52LB7	SUDS3
A0A024R5W0	HERC1	wt+LPS(106)	#N/A	RVS(0.987)T(0.013)DLPEGQDVYTAACNSVIHR	NaN	-0.6597	NaN	0	LPS up (LPS only)	3		O75592	MYCBP2	P-mut+LPS(81)	P-mut(86)	SYS(1)VVASEYDK	NaN	-1.05135	NaN	0	LPS up (LPS only)	33		B9A6K1	TBC1D5	#N/A	#N/A	S(0.001)ES(0.999)MPVQLNK	NaN	-2.07894	NaN	0	LPS up (LPS only)	25		P16402	HIST1H1D	C70A(182)	C70A(225)	SETAPLAPT(1)IPAPAEKTPVKK	2.26592	NaN	NaN	0	LPS down (untreated only)	65		Q2NKX8	ERCC6L
A0A024R734	NFAT5	wt+LPS(106)	#N/A	EIS(0.082)S(0.918)PARPCSFEEAMK	NaN	-0.0201684	NaN	0	LPS up (LPS only)	4		P10244	MYBL2	#N/A	#N/A	SS(0.001)RGELIPIS(0.995)PS(0.003)TEVGGSGIGTPPSVLK	NaN	-0.892832	NaN	0	LPS up (LPS only)	34		A0A0C4DGG3	KDM2B	P-mim+LPS(133)	P-mim(154)	VISRPPPS(0.903)VS(0.097)PPK	NaN	-0.625267	NaN	0	LPS up (LPS only)	26		P46013	MKI67	C70A(182)	C70A(225)	LDLLGNLPGS(1)K	-2.08243	NaN	NaN	0	LPS down (untreated only)	66		Q5JSZ5	PRRC2B
A0A024R9Y5	FGD1	wt+LPS(106)	#N/A	LRS(1)DPGPPTETPSQRPSPLK	NaN	-1.2121	NaN	0	LPS up (LPS only)	5		P24928	POLR2A	P-mut+LPS(81)	#N/A	YTPTSPSYSPS(0.069)S(0.93)PEYT(0.001)PTSPK	NaN	-0.516301	NaN	0	LPS up (LPS only)	35		A0A0S2Z4Y4	CLINT1	P-mim+LPS(133)	P-mim(154)	AS(1)PDQNASTHTPQSSVK	NaN	-0.348205	NaN	0	LPS up (LPS only)	27		P49006	MARCKSL1	C70A(182)	C70A(225)	AAAT(1)PESQEPQAK	-2.5529	NaN	NaN	0	LPS down (untreated only)	67		Q6IEH8	NIPBL
A0A024RAC6	TCEB3	wt+LPS(106)	#N/A	AFS(0.936)S(0.064)PQEEEEAGFTGR	NaN	-0.0424161	NaN	0	LPS up (LPS only)	6		P51610	HCFC1	P-mut+LPS(81)	#N/A	ASAVS(1)PANLPAVLLQPR	NaN	-2.84371	NaN	0	LPS up (LPS only)	36		A0A140VK05	AKAP1	P-mim+LPS(133)	#N/A	SIPLECPLS(0.951)S(0.049)PK	NaN	-0.534741	NaN	0	LPS up (LPS only)	28		P53621	COPA	C70A(182)	#N/A	NLS(1)PGAVESDVR	-1.14074	NaN	NaN	0	LPS down (untreated only)	68		Q6ZRV2	FAM83H
A0A024RAC6	TCEB3	wt+LPS(106)	#N/A	AFS(0.003)S(0.997)PQEEEEAGFTGR	NaN	-0.0270139	NaN	0	LPS up (LPS only)	7		Q00653	NFKB2	P-mut+LPS(81)	P-mut(86)	ASDGSFSLPLKPVIS(0.004)QPIHDS(0.047)KS(0.931)PGAS(0.018)NLK	NaN	-1.1371	NaN	0	LPS up (LPS only)	37		O14980	XPO1	#N/A	P-mim(154)	RQMS(1)VPGIFNPHEIPEEMCD	NaN	-0.858757	NaN	0	LPS up (LPS only)	29		P78346	RPP30	C70A(182)	C70A(225)	KPRPS(1)EGDEDCLPASK	-0.536697	NaN	NaN	0	LPS down (untreated only)	69		Q8IZT6	ASPM
A0A087WWP4	RBM15	#N/A	#N/A	VGAGAGAAPFREVDEIS(1)PEDDQRANR	NaN	-0.199843	NaN	0	LPS up (LPS only)	8		Q05BL1	TP53BP2	P-mut+LPS(81)	#N/A	S(0.001)AS(0.001)VTASS(0.003)ES(0.995)PVEIQNPYLHVEPEK	NaN	-0.682309	NaN	0	LPS up (LPS only)	38		O94804	STK10	#N/A	#N/A	QVAEQGGDLS(1)PAANR	NaN	-0.00206537	NaN	0	LPS up (LPS only)	30		Q02952	AKAP12	C70A(182)	#N/A	EVSSLEGS(1)PPPCLGQEEAVCTK	-0.553771	NaN	NaN	0	LPS down (untreated only)	70		Q71RC2	LARP4
A0A087X2D8	SPAG9	#N/A	#N/A	SHTSLKDELSDVSQGGS(1)K	NaN	0.141336	NaN	0	LPS up (LPS only)	9		Q09666	AHNAK	P-mut+LPS(81)	P-mut(86)	DIDIS(0.003)S(0.997)PEFK	NaN	-1.61354	NaN	0	LPS up (LPS only)	39		P05412	JUN	#N/A	#N/A	LIIQSSNGHIT(0.035)T(0.035)T(0.93)PT(0.994)PT(0.006)QFLCPK	NaN	-0.877649	NaN	0	LPS up (LPS only)	31		Q02952	AKAP12;DKFZp686M0430	C70A(182)	C70A(225)	LKETCVSGEDPTQGADLS(1)PDEK	-1.25522	NaN	NaN	0	LPS down (untreated only)	71		Q96PY6	NEK1
A0A0C4DGG1	PACSIN3	#N/A	#N/A	GGRS(1)PDEVTLTSIVPTR	NaN	-0.888603	NaN	0	LPS up (LPS only)	10		Q12888	TP53BP1	P-mut+LPS(81)	P-mut(86)	MVIQGPS(0.896)S(0.104)PQGEAMVTDVLEDQK	NaN	-0.0752045	NaN	0	LPS up (LPS only)	40		P35606	COPB2	#N/A	P-mim(154)	S(0.001)T(0.001)AQQELDGKPAS(0.014)PT(0.984)PVIVASHTANKEEK	NaN	0.31308	NaN	0	LPS up (LPS only)	32		Q03164	KMT2A	C70A(182)	#N/A	NSSTPGLQVPVS(0.006)PT(0.994)VPIQNQK	-1.14792	NaN	NaN	0	LPS down (untreated only)	72		Q96PY6	NEK1
A0A0S2Z4Z0	RBM14	wt+LPS(106)	#N/A	AQPS(0.001)AS(0.998)LGVGY(0.001)R	NaN	-1.30595	NaN	0	LPS up (LPS only)	11		Q13263	TRIM28	P-mut+LPS(81)	#N/A	LSPPY(0.001)S(0.982)S(0.017)PQEFAQDVGR	NaN	-1.43981	NaN	0	LPS up (LPS only)	41		A0A1B0GTL5		P-mim+LPS(133)	#N/A	LFTPS(0.002)RS(0.998)QEEEEEK	NaN	-0.513552	NaN	0	LPS up (LPS only)	33		Q05BL1	TP53BP2	C70A(182)	#N/A	S(0.001)AS(0.001)VTASS(0.003)ES(0.995)PVEIQNPYLHVEPEK	-1.4701	NaN	NaN	0	LPS down (untreated only)	73		Q9HAW0	BRF2
A0A0U1RR27	DENND4A	wt+LPS(106)	#N/A	MNS(0.998)S(0.001)FSVKPFEK	NaN	-0.770528	NaN	0	LPS up (LPS only)	12		Q3B874	STRN	P-mut+LPS(81)	#N/A	FLESAAADFS(1)DEDEDDDVDGREK	NaN	-1.05966	NaN	0	LPS up (LPS only)	42		A0A1S5UZ17		P-mim+LPS(133)	P-mim(154)	RGS(0.993)GDT(0.004)S(0.001)S(0.001)LIDPDTSLSELRESLSEVEEK	NaN	-0.664876	NaN	0	LPS up (LPS only)	34		Q12802	AKAP13	C70A(182)	C70A(225)	SGSLDSELSVS(1)PK	-0.977392	NaN	NaN	0	LPS down (untreated only)	74		Q9NYF3	FAM53C
A0A140VK53	SRRM2	wt+LPS(106)	#N/A	HAS(0.09)S(0.101)S(0.328)PES(0.479)PKPAPAPGS(0.996)HREIS(0.446)S(0.106)S(0.21)PT(0.129)S(0.115)K	NaN	1.00849	NaN	0	LPS up (LPS only)	13		A0A0G2JNZ2	SCRIB	#N/A	#N/A	LAEAPS(0.001)PAPT(0.01)PS(0.031)PT(0.034)PVEDLGPQT(0.237)S(0.237)T(0.237)S(0.237)PGRLS(0.977)PDFAEELR	NaN	-0.112808	NaN	0	LPS up (LPS only)	43		A0A1U9X972	PRRC2A	P-mim+LPS(133)	P-mim(154)	RKQS(0.984)S(0.013)S(0.002)EIS(0.002)LAVER	NaN	-1.02727	NaN	0	LPS up (LPS only)	35		Q13033	STRN3	C70A(182)	C70A(225)	NLEQILNGGES(1)PKQK	-0.814468	NaN	NaN	0	LPS down (untreated only)	75		Q9UKA4	AKAP11
A0A140VK53	SRRM2	#N/A	#N/A	SLS(1)GSSPCPK	NaN	-1.35627	NaN	0	LPS up (LPS only)	14		Q59FH1	TRRAP	#N/A	#N/A	SQS(1)LPGADSLLAKPIDK	NaN	-0.727874	NaN	0	LPS up (LPS only)	44		A0A1U9XBE3	MDC1	P-mim+LPS(133)	P-mim(154)	S(0.002)S(0.002)VKT(0.996)PESIVPIAPELQPSTSR	NaN	-0.844166	NaN	0	LPS up (LPS only)	36		Q13263	TRIM28	C70A(182)	#N/A	LSPPY(0.001)S(0.982)S(0.017)PQEFAQDVGR	-1.65491	NaN	NaN	0	LPS down (untreated only)	76		C9JE98	NCOR2
A0A1U9X839	NELFE;RDBP;NELF-E	#N/A	#N/A	RS(0.935)LS(0.065)EQPVMDTATATEQAK	NaN	0.965581	NaN	0	LPS up (LPS only)	15		Q5VT52	RPRD2	P-mut+LPS(81)	P-mut(86)	NTGVSPAS(0.002)RPS(0.013)PGT(0.976)PT(0.394)S(0.394)PS(0.087)NLT(0.068)S(0.068)GLK	NaN	-0.277104	NaN	0	LPS up (LPS only)	45		A0A1U9XBE3	MDC1	P-mim+LPS(133)	#N/A	VILERDTQRGEPEGGS(1)QDQK	NaN	0.476471	NaN	0	LPS up (LPS only)	37		Q4ZG32	EPB41L5	C70A(182)	#N/A	SALPVS(0.001)PS(0.002)IS(0.001)S(0.002)APVPVEIENLPQS(0.989)PGT(0.005)DQHDRK	-1.46728	NaN	NaN	0	LPS down (untreated only)	77		Q9UKG1	APPL1
A0PJH8	ZNHIT2	wt+LPS(106)	#N/A	GAGPQLLEELDNAPGS(0.003)DAAELELAPART(0.99)PPDS(0.007)VK	NaN	-0.495871	NaN	0	LPS up (LPS only)	16		Q8IYB7	DIS3L2	P-mut+LPS(81)	P-mut(86)	RPGTQGHLGPEKEEEES(0.998)DGEPEDSSTS	NaN	1.74048	NaN	0	LPS up (LPS only)	46		Q2L6I0	PPP1R10	#N/A	P-mim(154)	RQSNVAAPGDAT(1)PPAEK	NaN	-0.330138	NaN	0	LPS up (LPS only)	38		Q53ET0	CRTC2	C70A(182)	#N/A	HGSGPNIILTGDS(0.004)S(0.996)PGFSK	-0.832717	NaN	NaN	0	LPS down (untreated only)	78		A0A1W6R6W1	ATGL;PNPLA2
A4D7U3	ATF2	#N/A	#N/A	NCEEVGLFNELAS(1)PFENEFKK	NaN	-0.622956	NaN	0	LPS up (LPS only)	17		Q8TCJ2	STT3B	P-mut+LPS(81)	P-mut(86)	ENPPVEDS(1)S(1)DEDDKRNQGNLYDK	NaN	0.855842	NaN	0	LPS up (LPS only)	47		Q6P2E9	EDC4	#N/A	P-mim(154)	AS(0.002)CAS(0.998)IDIEDATQHLRDILK	NaN	-1.44303	NaN	0	LPS up (LPS only)	39		Q53HB9	DDX56	#N/A	#N/A	SQNPLRS(1)FK	-0.960395	NaN	NaN	0	LPS down (untreated only)	79		D3DPS3	RPRC1;MAP7D1
A4FUT8	JMJD1B;KDM3B	wt+LPS(106)	wt+LPS(162)	S(0.001)LLNART(0.999)PENHENLFLQPPK	NaN	-0.0802129	NaN	0	LPS up (LPS only)	18		Q8WYP5	AHCTF1	P-mut+LPS(81)	P-mut(86)	ET(0.916)RIS(0.084)FVEEDVHPK	NaN	-1.52269	NaN	0	LPS up (LPS only)	48		A8K2P6	ZNF503	P-mim+LPS(133)	P-mim(154)	T(0.251)GS(0.336)PS(0.39)S(0.021)S(0.004)AS(0.032)ACS(0.964)PGGMLS(0.001)SAGGAPEGKDDKK	NaN	0.401629	NaN	0	LPS up (LPS only)	40		Q53SS8	PCBP1	C70A(182)	C70A(225)	QQSHFAMMHGGTGFAGIDS(0.042)S(0.034)S(0.923)PEVK	0.458071	NaN	NaN	0	LPS down (untreated only)	80		D3DS96	BAZ1A
A8K3Z5	NUP35	wt+LPS(106)	#N/A	CALS(0.007)S(0.991)PS(0.001)LAFTPPIK	NaN	-0.912517	NaN	0	LPS up (LPS only)	19		Q96JM3	CHAMP1	P-mut+LPS(81)	P-mut(86)	AVPPVS(1)PELRKPGPPLS(1)PEIR	NaN	-0.872118	NaN	0	LPS up (LPS only)	49		A8K3Z5	NUP35	P-mim+LPS(133)	P-mim(154)	TLGT(1)PTQPGSTPR	NaN	-0.0775738	NaN	0	LPS up (LPS only)	41		Q59FW1	MTA1	C70A(182)	#N/A	AECTARLPEASQS(1)PLVLK	-1.82295	NaN	NaN	0	LPS down (untreated only)	81		E7EPN9	PRRC2C
B1AMY1	TRAF2	#N/A	#N/A	AAAS(0.006)VT(0.974)PPGS(0.021)LELLQPGFSK	NaN	-1.78543	NaN	0	LPS up (LPS only)	20		Q9BU76	MMTAG2	P-mut+LPS(81)	#N/A	RPAEAT(0.996)S(0.007)S(0.025)PT(0.279)S(0.693)PERPR	NaN	0.351019	NaN	0	LPS up (LPS only)	50		Q8WUA4	GTF3C2	#N/A	P-mim(154)	ADLIPY(0.004)QDS(0.996)PEGPDHSSASSGVPNPPK	NaN	-0.625553	NaN	0	LPS up (LPS only)	42		Q5QJE6	DNTTIP2	C70A(182)	C70A(225)	QILIACS(1)PVSSVR	-1.49306	NaN	NaN	0	LPS down (untreated only)	82		F8W6G1	NRBP1
B3KN10	SEC23IP	#N/A	#N/A	VVES(1)PDFSKDEDYLGK	NaN	-0.36411	NaN	0	LPS up (LPS only)	21		Q9BXK5	BCL2L13	P-mut+LPS(81)	P-mut(86)	EINAREESLVEELS(1)PASEK	NaN	-1.10455	NaN	0	LPS up (LPS only)	51		A8MY87	KSR1	P-mim+LPS(133)	#N/A	ADVLEAHEAEAEEPEAGKS(1)EAEDDEDEVDDLPSSR	NaN	-0.135618	NaN	0	LPS up (LPS only)	43		Q5T5U3	ARHGAP21	C70A(182)	C70A(225)	T(0.036)T(0.164)S(0.794)PPLS(0.005)IPTTHLIHQPAGSR	-0.151846	NaN	NaN	0	LPS down (untreated only)	83		A0A087WXN9	MTSS1L
B3KNQ9	HSF1	wt+LPS(106)	#N/A	GHTDTEGRPPS(1)PPPT(0.913)S(0.028)T(0.059)PEK	NaN	-0.143762	NaN	0	LPS up (LPS only)	22		Q9NR30	DDX21	P-mut+LPS(81)	P-mut(86)	LKNGFPHPEPDCNPS(0.002)EAAS(1)EES(0.999)NS(0.999)EIEQEIPVEQK	NaN	3.04817	NaN	0	LPS up (LPS only)	52		A9CQZ8	TJP1;DKFZp686A1195;DKFZp686M05161	P-mim+LPS(133)	#N/A	AIPVS(0.032)PS(0.968)AVEEDEDEDGHTVVATAR	NaN	-0.175131	NaN	0	LPS up (LPS only)	44		Q5UIP0	RIF1	C70A(182)	#N/A	RVS(1)FADPIYQAGLADDIDRR	-0.899208	NaN	NaN	0	LPS down (untreated only)	84		Q53XM7	VAPB
B3KNT3	SRA1	#N/A	#N/A	APRS(0.001)PPVGS(0.984)GPAS(0.015)GVEPTSFPVESEAR	NaN	1.46311	NaN	0	LPS up (LPS only)	23		Q9NYF8	BCLAF1	P-mut+LPS(81)	#N/A	S(1)QEEPKDTFEHDPSESIDEFNK	NaN	-0.420902	NaN	0	LPS up (LPS only)	53		B1AMY1	TRAF2	#N/A	#N/A	AAAS(0.006)VT(0.974)PPGS(0.021)LELLQPGFSK	NaN	-2.64206	NaN	0	LPS up (LPS only)	45		Q5UIP0	RIF1	C70A(182)	C70A(225)	S(1)PLHIKDDVLPK	-0.729402	NaN	NaN	0	LPS down (untreated only)	85		O95835	LATS1
B4DL80	CDC27	wt+LPS(106)	#N/A	EVTPILAQTQSSGPQTSTTPQVLS(0.948)PT(0.038)IT(0.011)S(0.003)PPNALPR	NaN	-0.581778	NaN	0	LPS up (LPS only)	24		Q9P266	KIAA1462	P-mut+LPS(81)	#N/A	NRGLS(1)APDLR	NaN	-0.876448	NaN	0	LPS up (LPS only)	54		B2R749	CDCA3	P-mim+LPS(133)	#N/A	TSSGDPPS(1)PLVK	NaN	-1.11649	NaN	0	LPS up (LPS only)	46		Q69YN4	KIAA1429	C70A(182)	C70A(225)	SFLSEPS(0.035)S(0.035)PGRT(0.929)K	-1.09004	NaN	NaN	0	LPS down (untreated only)	86		P23246	SFPQ
B4DQF1	GORASP2	wt+LPS(106)	#N/A	ISLPGQMAGT(1)PIT(1)PLK	NaN	-0.605621	NaN	0	LPS up (LPS only)	25		Q9UKG1	APPL1	P-mut+LPS(81)	P-mut(86)	VNQSALEAVT(0.005)PS(0.966)PS(0.029)FQQR	NaN	-0.327834	NaN	0	LPS up (LPS only)	55		B2RA70	YES1	P-mim+LPS(133)	#N/A	YRPENTPEPVSTSVSHYGAEPT(0.027)T(0.196)VS(0.778)PCPS(0.803)S(0.105)S(0.091)AK	NaN	0.113107	NaN	0	LPS up (LPS only)	47		Q6AHZ7	DKFZp686A111;DKFZp686O0870;GTF3C1	C70A(182)	C70A(225)	TSQPPVPQGEAEEDS(1)QGK	-0.489427	NaN	NaN	0	LPS down (untreated only)	87		Q6PKG0	LARP1
B4DU91	EPN1	#N/A	#N/A	TALPTSGSSAGELELLAGEVPARS(0.997)PGAFDMS(0.003)GVR	NaN	-0.0340938	NaN	0	LPS up (LPS only)	26		Q9Y4K3	TRAF6	#N/A	#N/A	EGFQPRS(0.001)T(0.999)DAGV	NaN	0.689348	NaN	0	LPS up (LPS only)	56		B2RBH1	PLEKHA1	P-mim+LPS(133)	#N/A	S(0.004)NS(0.996)LVSTFTMEK	NaN	-2.03132	NaN	0	LPS up (LPS only)	48		Q6IEH8	NIPBL	C70A(182)	#N/A	NAASFPLRSPQPVCS(0.997)PAGS(0.003)EGTPK	-0.897423	NaN	NaN	0	LPS down (untreated only)	88		Q8NAF0	ZNF579
B4DVQ5	EIF3C;EIF3CL	wt+LPS(106)	#N/A	GGYRQQQS(1)QTAY	NaN	0.0819591	NaN	0	LPS up (LPS only)	27		U3KPW8	HOMEZ	P-mut+LPS(81)	#N/A	S(0.944)LNERAET(0.056)PPLPIPPPPPDIQPLER	NaN	-0.782031	NaN	0	LPS up (LPS only)	57		B2ZZ90	ACACA	P-mim+LPS(133)	P-mim(154)	FIIGSVSEDNS(1)EDEISNLVK	NaN	-1.34148	NaN	0	LPS up (LPS only)	49		Q6PJT7	ZC3H14;FLJ11806	#N/A	#N/A	T(0.016)PRIS(0.984)PPIKEEETK	-0.613706	NaN	NaN	0	LPS down (untreated only)	89		H0Y4R5	TMEM201
B9A6K1	TBC1D5	wt+LPS(106)	#N/A	S(0.001)ES(0.999)MPVQLNK	NaN	-0.804805	NaN	0	LPS up (LPS only)	28		V9HWE1	HEL113;VIM	P-mut+LPS(81)	#N/A	ETNLDS(1)LPLVDTHSK	NaN	-0.33518	NaN	0	LPS up (LPS only)	58		B3KTH8	POU3F2	P-mim+LPS(133)	#N/A	WLEEADSSS(0.001)GS(0.998)PTSIDK	NaN	-1.10096	NaN	0	LPS up (LPS only)	50		Q6ZRV2	FAM83H	#N/A	C70A(225)	RLS(1)LGQGDSTEAATEER	0.189923	NaN	NaN	0	LPS down (untreated only)	90		Q9Y4H2	IRS2
C9J0I9	ZC3HC1	#N/A	#N/A	SWDS(0.01)S(0.045)S(0.944)PVDRPEPEAASPTTR	NaN	0.0104062	NaN	0	LPS up (LPS only)	29		V9HWE1	HEL113;VIM	P-mut+LPS(81)	#N/A	ISLPLPNFS(0.913)S(0.087)LNLR	NaN	-2.78775	NaN	0	LPS up (LPS only)	59		B3KUZ1	CCDC130	P-mim+LPS(133)	P-mim(154)	VPEEAAQDRPMS(1)PGDCPPETTETPK	NaN	-0.123763	NaN	0	LPS up (LPS only)	51		Q7Z4Q2	HEATR3	C70A(182)	C70A(225)	RPQFS(0.033)PT(0.967)GDCQAEAAAAANGTGGEEDDGPAAELLEK	-0.321704	NaN	NaN	0	LPS down (untreated only)	91		A0A024R0R4	SAE1
D6W5A2	MTA3;tmp_locus_6	#N/A	#N/A	MPT(0.067)QS(0.932)EEEKLS(0.002)PS(0.251)PT(0.407)T(0.341)EDPRVR	NaN	-0.669172	NaN	0	LPS up (LPS only)	30		Q13263	TRIM28	#N/A	#N/A	GAAAAATGQPGTAPAGT(1)PGAPPLAGMAIVK	-0.303895	2.30573	2.60962	2.69577	LPS up p ≥ -log10 1.3	1		B4DU91	EPN1	#N/A	#N/A	TALPTSGSSAGELELLAGEVPARS(0.997)PGAFDMS(0.003)GVR	NaN	0.0371828	NaN	0	LPS up (LPS only)	52		Q92788	RRAD	C70A(182)	C70A(225)	S(0.999)MPVDERDLQAALT(0.001)PGALTAAAAGTGTQGPR	-0.902507	NaN	NaN	0	LPS down (untreated only)	92		A0A024R1U0	RANGAP1
D6W625	CHAF1A	wt+LPS(106)	#N/A	LNS(0.992)EAS(0.006)PS(0.002)REAINGQREDTGDQQGLLK	NaN	1.55145	NaN	0	LPS up (LPS only)	31		Q9Y2W1	THRAP3	P-mut+LPS(81)	P-mut(86)	ASAVSELS(1)PRER	1.3611	3.82084	2.45974	2.5502	LPS up p ≥ -log10 1.3	2		B4DV73		P-mim+LPS(133)	P-mim(154)	VQIS(0.004)PDS(0.996)GGLPER	NaN	1.38627	NaN	0	LPS up (LPS only)	53		Q96BY7	ATG2B	C70A(182)	#N/A	S(0.771)VS(0.229)VDESRPELIFR	-1.45648	NaN	NaN	0	LPS down (untreated only)	93		B9A6K1	TBC1D5
E9PGT3	RPS6KA1	wt+LPS(106)	#N/A	TPKDS(1)PGIPPSAGAHQLFR	NaN	0.0901916	NaN	0	LPS up (LPS only)	32		A0A024R9D2	MTDH	P-mut+LPS(81)	P-mut(86)	LSSQIS(1)AGEEK	-0.914427	1.1002	2.01462	1.83228	LPS up p ≥ -log10 1.3	3		B7Z5U0	PRICKLE3;LMO6	P-mim+LPS(133)	P-mim(154)	GAPHRHS(1)MPELGLR	NaN	-0.781631	NaN	0	LPS up (LPS only)	54		E5RIA0	SORBS3	#N/A	C70A(225)	ADGGS(1)PFLGRR	-1.05112	NaN	NaN	0	LPS down (untreated only)	94		A0A024R3R5	LBR
E9PPF9	MTFR1L	wt+LPS(106)	#N/A	NAS(1)VPNLRGSEER	NaN	-0.945435	NaN	0	LPS up (LPS only)	33		P60866	RPS20	#N/A	#N/A	DTGKT(1)PVEPEVAIHR	-0.571761	1.23738	1.80914	2.30951	LPS up p ≥ -log10 1.3	4		B7Z5Z7	NDRG1;TRG14	P-mim+LPS(133)	P-mim(154)	SRTAS(1)GSSVTSLDGTR	NaN	-0.755372	NaN	0	LPS up (LPS only)	55		Q96N67	DOCK7	C70A(182)	C70A(225)	AAPWGSNPS(1)PSAESTQAMDR	-1.12011	NaN	NaN	0	LPS down (untreated only)	95		B4DU91	EPN1
F8WA39	MTMR1	#N/A	#N/A	AAGGATAGS(0.001)RQPS(0.097)VET(0.894)LDS(0.008)PTGSHVEWCK	NaN	-0.359875	NaN	0	LPS up (LPS only)	34		P20700	LMNB1	P-mut+LPS(81)	#N/A	AGGPTTPLS(0.023)PT(0.977)RLSR	-0.0712785	1.54517	1.61645	1.91778	LPS up p ≥ -log10 1.3	5		D3DTX6	PPP1R9B	P-mim+LPS(133)	P-mim(154)	AS(0.09)S(0.909)LNENVDHS(0.001)ALLK	NaN	-0.457282	NaN	0	LPS up (LPS only)	56		Q9BUA3	C11orf84	C70A(182)	#N/A	SHILEQHPHT(0.002)LDLS(0.99)PS(0.008)EK	-0.642237	NaN	NaN	0	LPS down (untreated only)	96		A0A024R734	NFAT5
I3L2Z9	NEURL4;hCG_42028	#N/A	#N/A	SFPLHS(1)PVAGVAHR	NaN	-1.64819	NaN	0	LPS up (LPS only)	35		A0A140VK53	SRRM2;KIAA0324	#N/A	#N/A	TPAAAAAMNLAS(1)PR	1.2627	2.7032	1.4405	4.12425	LPS up p ≥ -log10 1.3	6		D3DUP2	WNK1	P-mim+LPS(133)	#N/A	EKPELS(0.004)EPS(0.033)HLNGPS(0.861)S(0.102)DPEAAFLS(0.001)R	NaN	-0.516476	NaN	0	LPS up (LPS only)	57		Q9HAW0	BRF2	#N/A	#N/A	RICPVPPVS(0.005)T(0.005)VT(0.013)GDENIS(0.967)DS(0.01)EIEQYLRTPQEVR	-0.165565	NaN	NaN	0	LPS down (untreated only)	97		J3KP15	SRSF2;SFRS2
J3KP15	SRSF2;SFRS2	wt+LPS(106)	#N/A	S(1)YGRPPPDVEGMTSLK	NaN	-0.902129	NaN	0	LPS up (LPS only)	36		A8K964	PNN	#N/A	#N/A	GFS(1)DSGGGPPAK	0.934015	2.21978	1.28577	1.86317	LPS up p ≥ -log10 1.3	7		D6W5C0	SPTBN1	P-mim+LPS(133)	P-mim(154)	TALPAQS(0.002)AAT(0.998)LPAR	NaN	-1.02048	NaN	0	LPS up (LPS only)	58		Q9P266	KIAA1462	C70A(182)	#N/A	NRGLS(1)APDLR	-1.09131	NaN	NaN	0	LPS down (untreated only)	98		A0A024R9Y5	FGD1
O00178	GTPBP1	wt+LPS(106)	#N/A	LLQTTNNS(1)PMNSKPQQIK	NaN	-0.234031	NaN	0	LPS up (LPS only)	37		Q59FW1	MTA1	#N/A	P-mut(86)	VAPVINNGS(0.999)PT(0.001)ILGK	-0.667645	0.600968	1.26861	1.42224	LPS up p ≥ -log10 1.3	8		Q53GG0	LIMA1	#N/A	P-mim(154)	ETPHS(1)PGVEDAPIAK	NaN	1.73881	NaN	0	LPS up (LPS only)	59		Q9UGU5	HMGXB4	C70A(182)	C70A(225)	SPPTTMLLPAS(1)PAK	-0.691744	NaN	NaN	0	LPS down (untreated only)	99		A0A024RAC6	TCEB3
O14980	XPO1	wt+LPS(106)	#N/A	RQMS(1)VPGIFNPHEIPEEMCD	NaN	-0.856026	NaN	0	LPS up (LPS only)	38		A0A075B7F8	POM121C;POM121	#N/A	#N/A	APPTLQAETATKPQATSAPS(1)PAPK	-0.0523025	1.19411	1.24641	2.3311	LPS up p ≥ -log10 1.3	9		F2Z2E2	IQGAP3	P-mim+LPS(133)	#N/A	RQACTAQT(1)PEPLRR	NaN	-0.00920628	NaN	0	LPS up (LPS only)	60		Q9Y2H0	DLGAP4	C70A(182)	C70A(225)	ANSWQLVET(1)PEK	-1.62411	NaN	NaN	0	LPS down (untreated only)	100		A0A024RAC6	TCEB3
P02545	LMNA	#N/A	#N/A	LDNARQS(1)AERNSNLVGAAHEELQQSR	NaN	-0.515789	NaN	0	LPS up (LPS only)	39		B3KSZ4	GATAD2B	#N/A	#N/A	LQQQAALS(0.999)PT(0.001)TAPAVSSVSK	0.225972	1.46169	1.23572	2.93191	LPS up p ≥ -log10 1.3	10		F4ZW66	ILF3	P-mim+LPS(133)	#N/A	LFPDT(1)PLALDANKK	NaN	-1.8757	NaN	0	LPS up (LPS only)	61		Q9Y2W1	THRAP3	C70A(182)	C70A(225)	EKGS(1)FSDTGLGDGK	-1.68094	NaN	NaN	0	LPS down (untreated only)	101		Q6P5Z9	CLIP1;RSN
P05412	JUN	wt+LPS(106)	#N/A	LIIQSSNGHIT(0.035)T(0.035)T(0.93)PT(0.994)PT(0.006)QFLCPK	NaN	-0.749317	NaN	0	LPS up (LPS only)	40		P05412	JUN	#N/A	#N/A	NSDLLT(1)SPDVGLLK	0.739233	1.93074	1.1915	3.09098	LPS up p ≥ -log10 1.3	11		A8K3M3	PTPN1	#N/A	#N/A	GS(1)PLNAAPYGIESMSQDTEVR	NaN	0.271087	NaN	0	LPS up (LPS only)	62		S4R3H4	ACIN1	C70A(182)	#N/A	ASLVALPEQTASEEET(1)PPPLLTK	-1.75558	NaN	NaN	0	LPS down (untreated only)	102		A0A087WWP4	RBM15
P05412	JUN	#N/A	#N/A	LIIQSSNGHIT(0.006)T(0.009)T(0.985)PT(0.965)PT(0.035)QFLCPK	NaN	-1.30237	NaN	0	LPS up (LPS only)	41		A0A024QZW7	NUP153	P-mut+LPS(81)	#N/A	VQMT(0.006)S(0.977)PS(0.003)S(0.001)T(0.004)GS(0.009)PMFK	-0.647168	0.483452	1.13062	1.35657	LPS up p ≥ -log10 1.3	12		F8WA39	MTMR1	#N/A	#N/A	AAGGATAGS(0.001)RQPS(0.097)VET(0.894)LDS(0.008)PTGSHVEWCK	NaN	0.195901	NaN	0	LPS up (LPS only)	63		A0A024QZW7	NUP153	C70A+LPS(84)	#N/A	VQMT(0.006)S(0.977)PS(0.003)S(0.001)T(0.004)GS(0.009)PMFK	NaN	-1.42593	NaN	0	LPS up (LPS only)	1		A0A0C4DGG1	PACSIN3
P10244	MYBL2	#N/A	#N/A	SS(0.001)RGELIPIS(0.995)PS(0.003)TEVGGSGIGTPPSVLK	NaN	-0.6165	NaN	0	LPS up (LPS only)	42		P51610	HCFC1	#N/A	#N/A	TITLVKS(1)PISVPGGSALISNLGK	-1.1862	-0.0900799	1.09612	4.32464	LPS up p ≥ -log10 1.3	13		G1UI22	MLLT4	P-mim+LPS(133)	#N/A	DY(0.002)EPPS(0.963)PS(0.035)PAPGAPPPPPQR	NaN	-0.577514	NaN	0	LPS up (LPS only)	64		A0A024QZW7	NUP153	C70A+LPS(84)	C70A(225)	EGSVLDILKS(1)PGFASPK	NaN	-1.72659	NaN	0	LPS up (LPS only)	2		E9PPF9	MTFR1L
P35606	COPB2	wt+LPS(106)	#N/A	S(0.001)T(0.001)AQQELDGKPAS(0.014)PT(0.984)PVIVASHTANKEEK	NaN	-0.468074	NaN	0	LPS up (LPS only)	43		P51610	HCFC1	#N/A	P-mut(86)	VAS(0.003)S(0.997)PVMVSNPATR	-0.345586	0.742208	1.08779	2.86813	LPS up p ≥ -log10 1.3	14		H7BY10	RPL23A	P-mim+LPS(133)	P-mim(154)	IRTS(0.001)PT(0.999)FR	NaN	3.13741	NaN	0	LPS up (LPS only)	65		A0A024R1A3	UBE1;UBA1	C70A+LPS(84)	C70A(225)	AT(0.001)LPS(0.999)PDKLPGFK	NaN	-1.67873	NaN	0	LPS up (LPS only)	3		A0A0U1RR27	DENND4A
P55265	ADAR	wt+LPS(106)	#N/A	TAESQT(1)PTPSATSFFSGK	NaN	0.630215	NaN	0	LPS up (LPS only)	44		B9EIS5	PCM1	#N/A	#N/A	Y(1)MS(1)QMS(1)VPEQAELEK	0.467902	1.55286	1.08496	3.5197	LPS up p ≥ -log10 1.3	15		I3L2Z9	NEURL4;hCG_42028	#N/A	#N/A	SFPLHS(1)PVAGVAHR	NaN	-1.55521	NaN	0	LPS up (LPS only)	66		A0A024R3R5	LBR	C70A+LPS(84)	C70A(225)	FNLS(1)QESSYIATQYSLRPR	NaN	-1.27352	NaN	0	LPS up (LPS only)	4		A0A140VK53	SRRM2
Q09666	AHNAK	wt+LPS(106)	#N/A	VKT(1)PEMIIQKPK	NaN	-1.83702	NaN	0	LPS up (LPS only)	45		A0A0S2Q0B1	ARID1A;ARID1A variant protein	#N/A	#N/A	TPQPSS(1)PMDQMGK	-0.96684	0.0977115	1.06455	2.58102	LPS up p ≥ -log10 1.3	16		J3KP75	PHACTR2	P-mim+LPS(133)	P-mim(154)	ASIANSDGPTAGSQT(1)PPFK	NaN	-1.2298	NaN	0	LPS up (LPS only)	67		A0A024RAM4	MAP1B;DKFZp686F1345	C70A+LPS(84)	#N/A	SLMS(1)S(1)PEDLTK	NaN	-0.30874	NaN	0	LPS up (LPS only)	5		A0A140VK53	SRRM2
Q12802	AKAP13	wt+LPS(106)	#N/A	IPSFFPSPEEPPS(1)PSAPSIAK	NaN	-0.876316	NaN	0	LPS up (LPS only)	46		O00231	PSMD11	#N/A	#N/A	AQS(1)LLSTDREASIDILHSIVK	-2.06812	-1.07033	0.997786	1.61113	LPS up p ≥ -log10 1.3	17		J3KPD3	RBM7	P-mim+LPS(133)	#N/A	SFS(0.998)S(0.002)PENFQR	NaN	-0.196565	NaN	0	LPS up (LPS only)	68		A0A024RAM4	MAP1B;DKFZp686F1345	C70A+LPS(84)	C70A(225)	KLGDVS(0.063)PT(0.937)QIDVSQFGSFK	NaN	-1.88517	NaN	0	LPS up (LPS only)	6		Q5ST79	IER3;PRG1;IEX-1L
Q2L6I0	PPP1R10	wt+LPS(106)	wt+LPS(162)	RQSNVAAPGDAT(1)PPAEK	NaN	-0.207683	NaN	0	LPS up (LPS only)	47		E7EVA0	MAP4	P-mut+LPS(81)	#N/A	TTTAAAVAS(0.007)T(0.005)GPS(0.017)S(0.01)RS(0.96)PSTLLPK	-0.0811331	0.915344	0.996477	1.5456	LPS up p ≥ -log10 1.3	18		J3KTD8	CBFB	P-mim+LPS(133)	P-mim(154)	RQQDPS(0.999)PGS(0.001)NLGGGDDLK	NaN	-0.272822	NaN	0	LPS up (LPS only)	69		A0A024RBE7	TMPO	C70A+LPS(84)	#N/A	GPPDFS(0.999)S(0.999)DEEREPT(0.044)PVLGS(0.958)GAAAAGR	NaN	1.22656	NaN	0	LPS up (LPS only)	7		A0A1U9X839	NELFE;RDBP;NELF-E
Q4LE70	APC variant protein;APC	#N/A	#N/A	S(0.002)GRS(0.996)PT(0.001)GNTPPVIDSVSEK	NaN	-0.325331	NaN	0	LPS up (LPS only)	48		A0A140VK05	AKAP1	P-mut+LPS(81)	#N/A	SIPLECPLS(0.951)S(0.049)PK	-1.35657	-0.387599	0.968967	1.67156	LPS up p ≥ -log10 1.3	19		J3QRU8	GIT1;DKFZp686G1540	P-mim+LPS(133)	#N/A	S(0.039)LS(0.912)S(0.049)PTDNLELSLR	NaN	-1.36901	NaN	0	LPS up (LPS only)	70		Q02952	AKAP12	#N/A	C70A(225)	SPPS(1)PVER	NaN	-0.502241	NaN	0	LPS up (LPS only)	8		A4D7U3	ATF2
Q59FH1	TRRAP	#N/A	#N/A	SQS(1)LPGADSLLAKPIDK	NaN	-0.10323	NaN	0	LPS up (LPS only)	49		O15085	ARHGEF11	#N/A	#N/A	SSSQSTFHIPLS(1)PVEVKPGNVR	-0.908482	0.0602049	0.968687	3.08062	LPS up p ≥ -log10 1.3	20		O14686	KMT2D	P-mim+LPS(133)	#N/A	ASEPLLS(1)PPPFGESRK	NaN	-1.00929	NaN	0	LPS up (LPS only)	71		A0A087WVZ6	ZMYND8;DKFZp564P1772	#N/A	C70A(225)	SPMSTNSSVHTGS(1)DVEQDAEK	NaN	-0.207827	NaN	0	LPS up (LPS only)	9		B0FTY2	NUDCD3
Q5JSZ5	PRRC2B	wt+LPS(106)	#N/A	VKRS(1)PDEALPGGLSGCSSGSGHSPYALER	NaN	0.0735974	NaN	0	LPS up (LPS only)	50		Q4LE74	MYO9B variant protein;MYO9B	#N/A	#N/A	KKPGDASSLPDAGLS(0.996)PGS(0.004)QVDSK	0.526298	1.47987	0.95357	3.52629	LPS up p ≥ -log10 1.3	21		O43347	MSI1	P-mim+LPS(133)	#N/A	METDAPQPGLAS(1)PDSPHDPCK	NaN	-1.01805	NaN	0	LPS up (LPS only)	72		A0A0B4J1S8	PI4KB	#N/A	#N/A	KRELPSLSPAPDT(0.022)GLS(0.917)PS(0.061)K	NaN	-0.553949	NaN	0	LPS up (LPS only)	10		B2RBH1	PLEKHA1
Q6P2E9	EDC4	wt+LPS(106)	#N/A	AS(0.002)CAS(0.998)IDIEDATQHLRDILK	NaN	-1.46674	NaN	0	LPS up (LPS only)	51		P07197	NEFM;NEF3	P-mut+LPS(81)	P-mut(86)	SPVPKS(1)PVEEAK	1.18852	2.1389	0.950381	1.87275	LPS up p ≥ -log10 1.3	22		O43598	DNPH1	P-mim+LPS(133)	#N/A	AAAMVPGRSES(1)WER	NaN	-0.522225	NaN	0	LPS up (LPS only)	73		A0A0S2Z3L2	ATP2A2	C70A+LPS(84)	C70A(225)	AFTGREFDELNPS(1)AQR	NaN	-1.17916	NaN	0	LPS up (LPS only)	11		B3KN10	SEC23IP
Q9H3U1	UNC45A	wt+LPS(106)	#N/A	T(0.286)VS(0.423)GPGT(0.291)PEPRPAT(0.99)PGAS(0.002)S(0.008)VEQLRK	NaN	1.10761	NaN	0	LPS up (LPS only)	52		A0A1U9X839	NELFE;RDBP;NELF-E	#N/A	#N/A	RSLS(1)EQPVMDTATATEQAK	0.44824	1.37813	0.92989	2.21436	LPS up p ≥ -log10 1.3	23		O75113	N4BP1	P-mim+LPS(133)	#N/A	KQFS(1)LENVQEGEILHDAK	NaN	0.261415	NaN	0	LPS up (LPS only)	74		A0A140VK05	AKAP1	C70A+LPS(84)	#N/A	SIPLECPLS(0.951)S(0.049)PK	NaN	-0.809034	NaN	0	LPS up (LPS only)	12		B3KNT3	SRA1
Q9Y4H2	IRS2	wt+LPS(106)	#N/A	LCPSCPAS(0.005)S(0.995)PK	NaN	-0.000890553	NaN	0	LPS up (LPS only)	53		F5H8D7	XRCC1	P-mut+LPS(81)	#N/A	KTPSKPPAQLS(0.991)PS(0.009)VPK	-0.0881032	0.826908	0.915011	1.82761	LPS up p ≥ -log10 1.3	24		O75475	PSIP1	P-mim+LPS(133)	P-mim(154)	ETSVSKEDTDHEEKAS(1)NEDVTK	NaN	-0.0762393	NaN	0	LPS up (LPS only)	75		A0A140VK53	SRRM2	#N/A	#N/A	SLS(1)GSSPCPK	NaN	-1.02306	NaN	0	LPS up (LPS only)	13		Q6IAW5	CALU
Q9Y4K3	TRAF6	#N/A	#N/A	EGFQPRS(0.001)T(0.999)DAGV	NaN	-0.211673	NaN	0	LPS up (LPS only)	54		Q9GZR2	REXO4	P-mut+LPS(81)	P-mut(86)	RAPS(0.041)S(0.959)PVAKPGPVK	0.633233	1.5459	0.912664	1.31397	LPS up p ≥ -log10 1.3	25		O94804	STK10	P-mim+LPS(133)	#N/A	ASQSRPNS(0.963)S(0.037)ALETLGGEK	NaN	-0.839568	NaN	0	LPS up (LPS only)	76		A0A1B0GTL5		C70A+LPS(84)	#N/A	LFTPS(0.002)RS(0.998)QEEEEEK	NaN	-1.01599	NaN	0	LPS up (LPS only)	14		B4DL80	CDC27
Q13263	TRIM28	wt+LPS(106)	wt+LPS(162)	GAAAAATGQPGTAPAGT(1)PGAPPLAGMAIVK	0.0485892	3.09169	3.0431	3.54024	LPS up p ≥ -log10 1.3	1		Q659E9	DKFZp586H1823	#N/A	P-mut(86)	GLAS(1)PTAITPVASAICGK	-1.46754	-0.555287	0.912251	1.58797	LPS up p ≥ -log10 1.3	26		O95251	KAT7	#N/A	#N/A	LSQSS(0.001)QDS(0.604)S(0.393)PVRNLQS(0.002)FGTEEPAYSTRR	NaN	0.419182	NaN	0	LPS up (LPS only)	77		A0A1U9X839	NELFE;RDBP;NELF-E	#N/A	C70A(225)	RS(0.935)LS(0.065)EQPVMDTATATEQAK	NaN	-0.555237	NaN	0	LPS up (LPS only)	15		B4E0X8	FUBP1
P60866	RPS20	wt+LPS(106)	#N/A	DTGKT(1)PVEPEVAIHR	-0.742539	1.9685	2.71104	5.3737	LPS up p ≥ -log10 1.3	2		B7Z687	ROBO1	P-mut+LPS(81)	#N/A	KVPS(1)FTFTPTVTYQR	-1.35488	-0.47221	0.882668	1.30917	LPS up p ≥ -log10 1.3	27		O95425	DKFZp586H1823;SVIL	P-mim+LPS(133)	#N/A	SVDYNMPRS(1)PVEMDEDFDVIFDPYAPK	NaN	-1.03871	NaN	0	LPS up (LPS only)	78		A1L390	PLEKHG3	C70A+LPS(84)	#N/A	RRES(0.996)LS(0.004)Y(0.001)IPK	NaN	-0.265142	NaN	0	LPS up (LPS only)	16		B4DV73
V9HW43	HEL-S-102;HSPB1	wt+LPS(106)	#N/A	QLS(1)SGVSEIR	0.157368	2.70594	2.54857	3.65728	LPS up p ≥ -log10 1.3	3		A0A087X2D8	SPAG9	#N/A	#N/A	SHTSLKDELSDVSQGGS(1)K	-0.637877	0.243891	0.881768	1.79747	LPS up p ≥ -log10 1.3	28		O95785	WIZ	P-mim+LPS(133)	P-mim(154)	NPEDKS(1)PQLSLSPRPAS(1)PK	NaN	-0.492794	NaN	0	LPS up (LPS only)	79		A4D7U3	ATF2	#N/A	C70A(225)	NCEEVGLFNELAS(1)PFENEFKK	NaN	-2.09521	NaN	0	LPS up (LPS only)	17		O95602	POLR1A
A0A140VK53	SRRM2;KIAA0324	wt+LPS(106)	#N/A	TAVAPSAVNLADPRT(0.997)PT(0.003)APAVNLAGAR	-0.622206	1.64701	2.26921	4.61754	LPS up p ≥ -log10 1.3	4		P42224	STAT1	#N/A	P-mut(86)	LQTTDNLLPMS(1)PEEFDEVSR	-1.79744	-0.95665	0.840789	2.24478	LPS up p ≥ -log10 1.3	29		O95835	LATS1	P-mim+LPS(133)	#N/A	T(1)FPASNYTVSSR	NaN	-1.29061	NaN	0	LPS up (LPS only)	80		B1AMY1	TRAF2	#N/A	#N/A	AAAS(0.006)VT(0.974)PPGS(0.021)LELLQPGFSK	NaN	-2.04552	NaN	0	LPS up (LPS only)	18		D3DUR9	ZNF384
B4DNI1	SZRD1	#N/A	wt+LPS(162)	S(1)KS(1)PPKVPIVIQDDSLPAGPPPQIR	1.17916	3.43319	2.25403	1.76097	LPS up p ≥ -log10 1.3	5		A0A024RAM4	MAP1B;DKFZp686F1345	P-mut+LPS(81)	P-mut(86)	S(0.274)GKQGS(0.726)PDQVS(1)PVSEMTSTSLYQDK	-0.231176	0.596978	0.828154	1.31811	LPS up p ≥ -log10 1.3	30		P05412	JUN	#N/A	#N/A	LIIQSSNGHIT(0.006)T(0.009)T(0.985)PT(0.965)PT(0.035)QFLCPK	NaN	-0.859623	NaN	0	LPS up (LPS only)	81		B2R749	CDCA3	C70A+LPS(84)	#N/A	TSSGDPPS(1)PLVK	NaN	-1.40384	NaN	0	LPS up (LPS only)	19		D6RB01	FAM169A
B4DJ44	TOM1	#N/A	#N/A	AADRLPNLS(0.906)S(0.093)PS(0.002)AEGPPGPPSGPAPR	0.0770499	2.2731	2.19605	3.29507	LPS up p ≥ -log10 1.3	6		B7ZLK1	KIAA0528;C2CD5	P-mut+LPS(81)	P-mut(86)	LSSPAAFLPACNS(0.999)PS(0.001)K	0.426509	1.21615	0.789643	1.3838	LPS up p ≥ -log10 1.3	31		P10244	MYBL2	#N/A	#N/A	SS(0.001)RGELIPIS(0.995)PS(0.003)TEVGGSGIGTPPSVLK	NaN	-0.792412	NaN	0	LPS up (LPS only)	82		B2RBH1	PLEKHA1	C70A+LPS(84)	#N/A	S(0.004)NS(0.996)LVSTFTMEK	NaN	-1.67903	NaN	0	LPS up (LPS only)	20		D6W5A2	MTA3;tmp_locus_6
P36507	MAP2K2	wt+LPS(106)	wt+LPS(162)	RKPVLPALTINPTIAEGPS(0.899)PT(0.069)S(0.027)EGAS(0.004)EANLVDLQK	1.05712	3.19938	2.14226	2.72495	LPS up p ≥ -log10 1.3	7		Q14684	RRP1B	P-mut+LPS(81)	P-mut(86)	KFQDLSEGSSISQLSFAEDIS(1)ADEDDQILSQGK	-2.44873	-1.66365	0.785078	1.33929	LPS up p ≥ -log10 1.3	32		P42566	EPS15	P-mim+LPS(133)	P-mim(154)	NIIGS(0.002)S(0.998)PVADFSAIK	NaN	-1.20458	NaN	0	LPS up (LPS only)	83		B3KNT3	SRA1	#N/A	#N/A	APRS(0.001)PPVGS(0.984)GPAS(0.015)GVEPTSFPVESEAR	NaN	0.416796	NaN	0	LPS up (LPS only)	21		D6W625	CHAF1A
A0A140VK53	SRRM2;KIAA0324	wt+LPS(106)	#N/A	TPAAAAAMNLAS(1)PR	1.05757	3.19512	2.13755	5.92867	LPS up p ≥ -log10 1.3	8		A2A2D0	STMN1	#N/A	P-mut(86)	RAS(1)GQAFELILS(1)PR	0.749019	1.52704	0.778021	2.34735	LPS up p ≥ -log10 1.3	33		P42858	HTT;HD	P-mim+LPS(133)	P-mim(154)	LLSPQMS(1)GEEEDSDLAAK	NaN	-0.756148	NaN	0	LPS up (LPS only)	84		B4DU91	EPN1	#N/A	#N/A	TALPTSGSSAGELELLAGEVPARS(0.997)PGAFDMS(0.003)GVR	NaN	-1.06843	NaN	0	LPS up (LPS only)	22		E5RHT4	POLR3D
V9HW43	HEL-S-102;HSPB1	wt+LPS(106)	wt+LPS(162)	GPS(1)WDPFRDWYPHSR	-1.46623	0.664213	2.13044	2.18238	LPS up p ≥ -log10 1.3	9		Q05519	SRSF11;DKFZp686P22142;DKFZp686D02116;SFRS11	#N/A	#N/A	LNHVAAGLVS(1)PSLK	1.24632	2.02344	0.77712	2.83456	LPS up p ≥ -log10 1.3	34		P46013	MKI67	P-mim+LPS(133)	P-mim(154)	LTQTSGQSTHTHKEPAS(1)GDEGIK	NaN	1.81819	NaN	0	LPS up (LPS only)	85		B7Z3V3	PTPN3	C70A+LPS(84)	C70A(225)	SLS(1)VEHLETK	NaN	-1.99172	NaN	0	LPS up (LPS only)	23		E9PGT3	RPS6KA1
V9HW43	HEL-S-102;HSPB1	#N/A	wt+LPS(162)	ALS(1)RQLS(0.821)S(0.178)GVS(0.001)EIR	0.116848	2.10167	1.98482	1.44609	LPS up p ≥ -log10 1.3	10		Q9ULJ3	ZBTB21;DKFZp781N1974	P-mut+LPS(81)	P-mut(86)	EHAPLAS(1)PVENK	-0.61192	0.161955	0.773876	1.83771	LPS up p ≥ -log10 1.3	35		P46019	PHKA1;PHKA2	P-mim+LPS(133)	P-mim(154)	SNS(1)GVRLDGYAR	NaN	1.31578	NaN	0	LPS up (LPS only)	86		D6W5A2	MTA3;tmp_locus_6	#N/A	#N/A	MPT(0.067)QS(0.932)EEEKLS(0.002)PS(0.251)PT(0.407)T(0.341)EDPRVR	NaN	-0.251893	NaN	0	LPS up (LPS only)	24		Q59FH1	TRRAP
B3KSZ4	GATAD2B	wt+LPS(106)	#N/A	LQQQAALS(0.999)PT(0.001)TAPAVSSVSK	-0.0796446	1.83153	1.91117	5.31	LPS up p ≥ -log10 1.3	11		Q7RTP6	MICAL3	P-mut+LPS(81)	#N/A	DRLGS(1)PLAVDEALRR	-0.563932	0.205365	0.769298	1.34213	LPS up p ≥ -log10 1.3	36		P49792	RANBP2	P-mim+LPS(133)	P-mim(154)	ELVGPPLAETVFT(0.001)PKT(0.881)S(0.118)PENVQDR	NaN	-0.315869	NaN	0	LPS up (LPS only)	87		E9PFQ4	PHLDB2;DKFZp686P22161	C70A+LPS(84)	C70A(225)	TSASEGNPYVSSTLSVPAS(1)PR	NaN	-1.28427	NaN	0	LPS up (LPS only)	25		A8K3Z5	NUP35
P51610	HCFC1	wt+LPS(106)	wt+LPS(162)	VAS(0.003)S(0.997)PVMVSNPATR	-1.04637	0.822526	1.8689	2.71236	LPS up p ≥ -log10 1.3	12		P42566	EPS15	#N/A	#N/A	RSINKLDS(1)PDPFK	0.433728	1.197	0.763276	1.50852	LPS up p ≥ -log10 1.3	37		P51610	HCFC1	P-mim+LPS(133)	#N/A	ASAVS(1)PANLPAVLLQPR	NaN	-4.52514	NaN	0	LPS up (LPS only)	88		E9PHM6	DST	C70A+LPS(84)	C70A(225)	S(0.997)FS(0.003)EDVISHK	NaN	-0.951974	NaN	0	LPS up (LPS only)	26		H3BPE1	MACF1
O95785	WIZ	wt+LPS(106)	#N/A	KLPPPPGS(1)PLGHS(0.996)PT(0.003)AS(0.001)PPPTAR	-0.76901	1.05893	1.82794	5.86571	LPS up p ≥ -log10 1.3	13		A0A024QZW7	NUP153	P-mut+LPS(81)	#N/A	RIPSIVS(0.006)S(0.994)PLNS(0.001)PLDR	-1.90665	-1.14457	0.762076	1.64023	LPS up p ≥ -log10 1.3	38		P53621	COPA	P-mim+LPS(133)	#N/A	NLS(1)PGAVESDVR	NaN	-0.986517	NaN	0	LPS up (LPS only)	89		F6RY50	SIPA1	C70A+LPS(84)	C70A(225)	S(0.032)GS(0.968)DAGEARPPTPASPR	NaN	-1.1533	NaN	0	LPS up (LPS only)	27		H3BPE1	MACF1;ACF7
Q549U1	HSU53209;TRA2A	wt+LPS(106)	wt+LPS(162)	RRS(1)PSPY(0.001)Y(0.001)S(0.999)R	1.44368	3.25967	1.81599	1.32504	LPS up p ≥ -log10 1.3	14		Q9BTC0	DIDO1	#N/A	#N/A	RNS(1)VERPAEPVAGAATPSLVEQQK	1.73618	2.47503	0.738846	1.51135	LPS up p ≥ -log10 1.3	39		P67809	YBX1	P-mim+LPS(133)	P-mim(154)	RPQYS(1)NPPVQGEVMEGADNQGAGEQGRPVR	NaN	0.0758471	NaN	0	LPS up (LPS only)	90		F6RY50	SIPA1	C70A+LPS(84)	C70A(225)	S(0.77)GS(0.23)DAGEARPPTPASPR	NaN	-1.1533	NaN	0	LPS up (LPS only)	28		O00178	GTPBP1
Q8N1H4	TRA2B;DKFZp686F18120	wt+LPS(106)	wt+LPS(162)	RRS(1)PSPY(0.001)Y(0.001)S(0.999)R	1.44368	3.25967	1.81599	1.32504	LPS up p ≥ -log10 1.3	15		P05412	JUN	#N/A	#N/A	LAS(1)PELER	1.81979	2.54743	0.727639	2.91283	LPS up p ≥ -log10 1.3	40		P78310	CXADR	P-mim+LPS(133)	#N/A	SYIGSNHSSLGS(0.003)MS(0.997)PSNMEGYSK	NaN	-0.597567	NaN	0	LPS up (LPS only)	91		H0YFN7	RIC1	C70A+LPS(84)	#N/A	S(0.018)IS(0.972)LS(0.01)QSAENVPASK	NaN	-1.48799	NaN	0	LPS up (LPS only)	29		O14980	XPO1
P05412	JUN	wt+LPS(106)	wt+LPS(162)	NSDLLT(1)SPDVGLLK	0.338933	2.1211	1.78217	2.68678	LPS up p ≥ -log10 1.3	16		P17535	JUND	#N/A	#N/A	LAS(1)PELER	1.81979	2.54743	0.727639	2.91283	LPS up p ≥ -log10 1.3	41		Q02952	AKAP12	P-mim+LPS(133)	#N/A	EVSSLEGS(1)PPPCLGQEEAVCTK	NaN	-0.643711	NaN	0	LPS up (LPS only)	92		H3BPE1	MACF1;ACF7	C70A+LPS(84)	C70A(225)	LLDAEDVDVPS(1)PDEK	NaN	-0.513564	NaN	0	LPS up (LPS only)	30		O75381	PEX14
P51610	HCFC1	wt+LPS(106)	#N/A	TITLVKS(1)PISVPGGSALISNLGK	-1.07473	0.697549	1.77228	2.14537	LPS up p ≥ -log10 1.3	17		Q9HA47	UCK1	#N/A	#N/A	RTFS(1)EPGDHPGMLTSGK	1.21988	1.93889	0.719004	2.05481	LPS up p ≥ -log10 1.3	42		Q03164	KMT2A	P-mim+LPS(133)	#N/A	NSSTPGLQVPVS(0.006)PT(0.994)VPIQNQK	NaN	-0.680025	NaN	0	LPS up (LPS only)	93		O00567	NOP56	C70A+LPS(84)	#N/A	S(0.01)FS(0.01)KEELMS(0.391)S(0.592)DLEET(0.99)AGS(0.005)T(0.002)S(0.001)IPK	NaN	-0.120407	NaN	0	LPS up (LPS only)	31		P02545	LMNA
A0A1U9X839	NELFE;RDBP;NELF-E	wt+LPS(106)	wt+LPS(162)	RSLS(1)EQPVMDTATATEQAK	0.204671	1.89969	1.69502	2.50056	LPS up p ≥ -log10 1.3	18		Q53ET0	CRTC2	P-mut+LPS(81)	#N/A	HGSGPNIILTGDS(0.004)S(0.996)PGFSK	-0.430319	0.27576	0.706079	1.37548	LPS up p ≥ -log10 1.3	43		Q05519	SRSF11;DKFZp686P22142;DKFZp686D02116;SFRS11	P-mim+LPS(133)	P-mim(154)	LNHVAAGLVS(0.055)PS(0.945)LK	NaN	0.647556	NaN	0	LPS up (LPS only)	94		O14686	KMT2D	C70A+LPS(84)	#N/A	ASEPLLS(1)PPPFGESRK	NaN	-1.08583	NaN	0	LPS up (LPS only)	32		P10244	MYBL2
Q4LE74	MYO9B variant protein;MYO9B	wt+LPS(106)	wt+LPS(162)	KKPGDASSLPDAGLS(0.996)PGS(0.004)QVDSK	-0.259095	1.39901	1.65811	2.30652	LPS up p ≥ -log10 1.3	19		A1L390	PLEKHG3	P-mut+LPS(81)	#N/A	RRES(0.996)LS(0.004)Y(0.001)IPK	-0.563519	0.13305	0.696569	1.41688	LPS up p ≥ -log10 1.3	44		Q05BL1	TP53BP2	P-mim+LPS(133)	#N/A	S(0.001)AS(0.001)VTASS(0.003)ES(0.995)PVEIQNPYLHVEPEK	NaN	-1.17151	NaN	0	LPS up (LPS only)	95		O43598	DNPH1	C70A+LPS(84)	#N/A	AAAMVPGRSES(1)WER	NaN	-1.35928	NaN	0	LPS up (LPS only)	33		Q4LE70	APC variant protein;APC
A0A024R4X7	hCG_1989366;NUP50	wt+LPS(106)	#N/A	VAAETQS(1)PSLFGSTK	-0.375579	1.19802	1.5736	3.34076	LPS up p ≥ -log10 1.3	20		A0A024R3T8	PARP1	P-mut+LPS(81)	#N/A	NREELGFRPEYSAS(1)QLK	-1.13488	-0.45386	0.681024	1.34789	LPS up p ≥ -log10 1.3	45		Q05BS8	SFRS2IP;SCAF11	P-mim+LPS(133)	#N/A	TEELIES(1)PKLESSEGEIIQTVDR	NaN	-0.662211	NaN	0	LPS up (LPS only)	96		Q9H788	SH2D4A	#N/A	C70A(225)	TLS(1)SSAQEDIIR	NaN	-1.63372	NaN	0	LPS up (LPS only)	34		P38159	RBMX
P29966	MARCKS	wt+LPS(106)	#N/A	EAPAEGEAAEPGS(1)PTAAEGEAASAASSTSSPK	0.770897	2.33399	1.56309	2.33262	LPS up p ≥ -log10 1.3	21		Q9UPT8	ZC3H4	P-mut+LPS(81)	P-mut(86)	Y(0.004)REY(0.009)S(0.978)PPY(0.008)APS(0.001)HQQYPPSHATPLPK	0.460481	1.11389	0.653407	1.44975	LPS up p ≥ -log10 1.3	46		Q05DC0	RNF20	P-mim+LPS(133)	P-mim(154)	ALVVPEPEPDS(0.001)DS(0.999)NQER	NaN	-0.854402	NaN	0	LPS up (LPS only)	97		O75113	N4BP1	C70A+LPS(84)	#N/A	KQFS(1)LENVQEGEILHDAK	NaN	-1.07639	NaN	0	LPS up (LPS only)	35		Q00653	NFKB2
B9EIS5	PCM1	#N/A	#N/A	Y(1)MS(1)QMS(1)VPEQAELEK	0.362773	1.91897	1.5562	3.06016	LPS up p ≥ -log10 1.3	22		O60885	BRD4	P-mut+LPS(81)	P-mut(86)	SEPFS(0.982)PS(0.018)LRPEPPKHPESIK	-0.28007	0.355868	0.635937	1.80985	LPS up p ≥ -log10 1.3	47		Q2L6I0	PPP1R10	P-mim+LPS(133)	P-mim(154)	LIPLDEECSMDETPYVETLEPGGS(0.927)GGS(0.07)PDGAGGS(0.003)K	NaN	-1.39069	NaN	0	LPS up (LPS only)	98		O95251	KAT7	#N/A	#N/A	LSQSS(0.001)QDS(0.604)S(0.393)PVRNLQS(0.002)FGTEEPAYSTRR	NaN	1.09587	NaN	0	LPS up (LPS only)	36		Q12802	AKAP13
Q8ND56	LSM14A	wt+LPS(106)	wt+LPS(162)	T(0.004)QLS(0.021)QGRS(0.976)S(0.999)PQLDPLRK	1.65879	3.1702	1.5114	2.30881	LPS up p ≥ -log10 1.3	23		B4DU91	EPN1	#N/A	#N/A	TALPTSGSSAGELELLAGEVPARS(0.997)PGAFDMS(0.003)GVR	-0.456938	0.176745	0.633683	1.3082	LPS up p ≥ -log10 1.3	48		Q3B874	STRN	P-mim+LPS(133)	#N/A	FLESAAADFS(1)DEDEDDDVDGREK	NaN	-0.684955	NaN	0	LPS up (LPS only)	99		O00231	PSMD11	#N/A	#N/A	AQS(1)LLSTDREASIDILHSIVK	NaN	-1.50706	NaN	0	LPS up (LPS only)	37		Q14566	MCM6
C9J4K0	C2orf49	#N/A	#N/A	SPSGPVKS(1)PPLS(1)PVGTTPVK	-0.636087	0.821499	1.45759	2.31057	LPS up p ≥ -log10 1.3	24		P49454	CENPF	P-mut+LPS(81)	#N/A	VAQRS(1)PVDSGTILREPTTK	0.643088	1.27677	0.633679	1.62059	LPS up p ≥ -log10 1.3	49		Q4ZG32	EPB41L5	P-mim+LPS(133)	#N/A	SALPVS(0.001)PS(0.002)IS(0.001)S(0.002)APVPVEIENLPQS(0.989)PGT(0.005)DQHDRK	NaN	-0.629809	NaN	0	LPS up (LPS only)	100		P02545	LMNA	#N/A	C70A(225)	LDNARQS(1)AERNSNLVGAAHEELQQSR	NaN	-0.226853	NaN	0	LPS up (LPS only)	38		Q5JSZ5	PRRC2B
C9J4K0	C2orf49	#N/A	#N/A	SPSGPVKS(1)PPLS(1)PVGTTPVK	-0.947931	0.469943	1.41787	2.26328	LPS up p ≥ -log10 1.3	25		P57740	NUP107	P-mut+LPS(81)	P-mut(86)	SLLRQPDISCILGTGGKS(1)PR	0.30217	0.918288	0.616118	2.2569	LPS up p ≥ -log10 1.3	50		Q59FH1	TRRAP	#N/A	#N/A	SQS(1)LPGADSLLAKPIDK	NaN	-0.270639	NaN	0	LPS up (LPS only)	101		P05412	JUN	#N/A	C70A(225)	AKNS(1)DLLTSPDVGLLK	NaN	-1.07181	NaN	0	LPS up (LPS only)	39		Q6P2E9	EDC4
A0A087X2D8	SPAG9	wt+LPS(106)	wt+LPS(162)	ERPISLGIFPLPAGDGLLT(1)PDAQK	-0.160533	1.17754	1.33807	2.26751	LPS up p ≥ -log10 1.3	26		D6W648	hCG_2004001;CAMSAP3	#N/A	#N/A	KFS(1)PSQVPVQTR	-0.564558	0.0469016	0.611459	1.69316	LPS up p ≥ -log10 1.3	51		Q59HE3	CAST	P-mim+LPS(133)	P-mim(154)	PIGPDDAIDALSSDFTCGS(0.997)PT(0.003)AAGK	NaN	-0.955138	NaN	0	LPS up (LPS only)	102		P05412	JUN	C70A+LPS(84)	C70A(225)	NSDLLTS(1)PDVGLLK	NaN	-2.72919	NaN	0	LPS up (LPS only)	40		Q7Z417	NUFIP2
Q9HA47	UCK1	wt+LPS(106)	wt+LPS(162)	RTFS(1)EPGDHPGMLTSGK	0.500226	1.83335	1.33312	1.98608	LPS up p ≥ -log10 1.3	27		O60293	ZFC3H1	P-mut+LPS(81)	P-mut(86)	RIS(0.998)T(0.001)S(0.001)DILSEK	-0.817508	-0.21329	0.604218	1.46945	LPS up p ≥ -log10 1.3	52		Q5SY16	NOL9	P-mim+LPS(133)	P-mim(154)	LAAFADALEFADEEKES(0.999)PVEFT(0.001)GHK	NaN	-1.07445	NaN	0	LPS up (LPS only)	103		P23246	SFPQ	C70A+LPS(84)	C70A(225)	GMGPGT(1)PAGYGR	NaN	-0.568123	NaN	0	LPS up (LPS only)	41		I3L2Z9	NEURL4;hCG_42028
Q9BTC0	DIDO1	wt+LPS(106)	wt+LPS(162)	RNS(1)VERPAEPVAGAATPSLVEQQK	1.67838	3.00057	1.32219	3.09291	LPS up p ≥ -log10 1.3	28		Q7Z726	KPNA2	P-mut+LPS(81)	P-mut(86)	NVSSFPDDAT(0.002)S(0.998)PLQENR	-0.300616	0.295181	0.595797	1.4549	LPS up p ≥ -log10 1.3	53		Q5T4S7	ZUBR1;UBR4	P-mim+LPS(133)	#N/A	HVTLPS(0.862)S(0.137)PR	NaN	-0.0882716	NaN	0	LPS up (LPS only)	104		P35251	RFC1;LLDBP	#N/A	#N/A	ELS(1)QNTDESGLNDEAIAK	NaN	-1.268	NaN	0	LPS up (LPS only)	42		Q92945	KHSRP
Q02952	AKAP12	#N/A	#N/A	S(0.073)AES(0.927)PTS(1)PVTSETGSTFKK	-1.64305	-0.32867	1.31438	1.3055	LPS up p ≥ -log10 1.3	29		A9CQZ8	TJP1;DKFZp686A1195;DKFZp686M05161	#N/A	#N/A	AIPVS(0.986)PS(0.014)AVEEDEDEDGHTVVATAR	0.689055	1.26853	0.579474	1.44905	LPS up p ≥ -log10 1.3	54		Q5UIP0	RIF1	P-mim+LPS(133)	#N/A	RVS(1)FADPIYQAGLADDIDRR	NaN	-1.12186	NaN	0	LPS up (LPS only)	105		P41162	ETV3	C70A+LPS(84)	C70A(225)	SSGVVPQS(1)APPVPTASSR	NaN	-1.11428	NaN	0	LPS up (LPS only)	43		Q9BXK5	BCL2L13
A2A2D0	STMN1	wt+LPS(106)	#N/A	RAS(1)GQAFELILS(1)PR	0.508274	1.81621	1.30794	1.89942	LPS up p ≥ -log10 1.3	30		B2R7D3	REPS1	#N/A	P-mut(86)	LKS(1)EDELRPEVDEHTQK	0.757002	1.33139	0.574385	1.51825	LPS up p ≥ -log10 1.3	55		B9EGI2	MPRIP;M-RIP;KIAA0864	#N/A	P-mim(154)	S(0.001)KS(0.999)NPDFLKK	NaN	-0.589271	NaN	0	LPS up (LPS only)	106		P49792	RANBP2	C70A+LPS(84)	C70A(225)	S(0.136)IS(0.852)S(0.012)PSVSSETMDKPVDLSTRK	NaN	-0.739163	NaN	0	LPS up (LPS only)	44		S4R3H4	ACIN1
A8K964	PNN	wt+LPS(106)	wt+LPS(162)	GFS(1)DSGGGPPAK	1.22353	2.50219	1.27866	1.57563	LPS up p ≥ -log10 1.3	31		B4DUJ0	PSMF1	#N/A	#N/A	ANVS(0.033)S(0.967)PHREFPPATAR	1.72188	2.28836	0.566475	2.25809	LPS up p ≥ -log10 1.3	56		Q6IEH8	NIPBL	P-mim+LPS(133)	#N/A	NAASFPLRSPQPVCS(0.997)PAGS(0.003)EGTPK	NaN	-0.260084	NaN	0	LPS up (LPS only)	107		P78310	CXADR	C70A+LPS(84)	#N/A	SYIGSNHSSLGS(0.003)MS(0.997)PSNMEGYSK	NaN	-1.12961	NaN	0	LPS up (LPS only)	45		B1AMY1	TRAF2
P42566	EPS15	wt+LPS(106)	#N/A	RSINKLDS(1)PDPFK	-0.0264011	1.24846	1.27486	2.85018	LPS up p ≥ -log10 1.3	32		B4DKX4	PDCD4	P-mut+LPS(81)	P-mut(86)	DSGRGDSVSDSGSDALRSGLTVPT(0.005)S(0.995)PK	0.877952	1.44201	0.564055	1.43087	LPS up p ≥ -log10 1.3	57		Q6P5Z9	CLIP1;RSN	P-mim+LPS(133)	#N/A	RS(0.019)PS(0.975)AS(0.004)S(0.002)LSSMSSVASSVSSRPSR	NaN	-0.927114	NaN	0	LPS up (LPS only)	108		Q14204	DYNC1H1	C70A+LPS(84)	#N/A	TRT(0.003)DS(0.026)T(0.923)S(0.048)DGRPAWMR	NaN	-1.12842	NaN	0	LPS up (LPS only)	46		A0PJH8	ZNHIT2
Q08AD1	CAMSAP2	wt+LPS(106)	#N/A	RFS(1)PSQVPIQTR	-1.35198	-0.124342	1.22764	1.42463	LPS up p ≥ -log10 1.3	33		K7EQH1	C18orf25;ARKL1	P-mut+LPS(81)	#N/A	RDS(0.992)S(0.008)ESQLASTESDKPTTGR	0.617861	1.17614	0.558284	1.34323	LPS up p ≥ -log10 1.3	58		Q6PJT7	ZC3H14	P-mim+LPS(133)	P-mim(154)	RIPVLS(1)PKPAVAPPAPPSSSQLCR	NaN	-0.344995	NaN	0	LPS up (LPS only)	109		Q14566	MCM6	C70A+LPS(84)	C70A(225)	EIESEIDS(1)EEELINKK	NaN	-1.70847	NaN	0	LPS up (LPS only)	47		B2RDE8	HDGF
A2A2D0	STMN1	wt+LPS(106)	wt+LPS(162)	ESVPEFPLS(1)PPKK	3.34277	4.5603	1.21753	2.44816	LPS up p ≥ -log10 1.3	34		V9HWE1	HEL113;VIM	P-mut+LPS(81)	P-mut(86)	TYSLGS(1)ALRPSTSR	-0.710515	-0.159717	0.550798	1.97107	LPS up p ≥ -log10 1.3	59		Q8ND56	LSM14A	P-mim+LPS(133)	P-mim(154)	S(0.121)PT(0.879)MEQAVQTASAHLPAPAAVGRR	NaN	-1.35674	NaN	0	LPS up (LPS only)	110		Q15149	PLEC	C70A+LPS(84)	C70A(225)	AQLEPVAS(1)PAKKPK	NaN	-2.20037	NaN	0	LPS up (LPS only)	48		B3KNQ9	HSF1
O15085	ARHGEF11	wt+LPS(106)	#N/A	SSSQSTFHIPLS(1)PVEVKPGNVR	-0.879859	0.337634	1.21749	3.35267	LPS up p ≥ -log10 1.3	35		O95235	KIF20A	P-mut+LPS(81)	P-mut(86)	EHSLQVS(1)PSLEK	-0.0891228	0.450211	0.539333	1.33647	LPS up p ≥ -log10 1.3	60		Q8NFD5	ARID1B	P-mim+LPS(133)	P-mim(154)	SHPAMS(1)PGTPGPTMGR	NaN	-0.794661	NaN	0	LPS up (LPS only)	111		Q27J81	INF2	#N/A	C70A(225)	EHNSMWAS(0.003)LS(0.013)S(0.985)PDAEAVEPDFSSIER	NaN	-0.973536	NaN	0	LPS up (LPS only)	49		B4DQF1	GORASP2
B4DUJ0	PSMF1	wt+LPS(106)	#N/A	ANVS(0.853)S(0.147)PHREFPPATAR	1.22106	2.43047	1.20941	1.93916	LPS up p ≥ -log10 1.3	36		B4DLG2	ZC3H11A	P-mut+LPS(81)	#N/A	TVLPTVPES(1)PEEEVK	0.256835	0.792067	0.535232	1.83605	LPS up p ≥ -log10 1.3	61		Q8TEW0	PARD3	P-mim+LPS(133)	P-mim(154)	RS(0.844)S(0.156)DPALIGLSTSVSDSNFSSEEPSR	NaN	1.13495	NaN	0	LPS up (LPS only)	112		Q4LE70	APC variant protein;APC	#N/A	C70A(225)	S(0.002)GRS(0.996)PT(0.001)GNTPPVIDSVSEK	NaN	0.144342	NaN	0	LPS up (LPS only)	50		F8WA39	MTMR1
B3KM42	DYNC1LI1	wt+LPS(106)	#N/A	ITRKPVTVSPT(0.41)T(0.59)PTS(0.999)PT(0.001)EGEAS	0.874784	2.0739	1.19912	2.10385	LPS up p ≥ -log10 1.3	37		A8K3M3	PTPN1	#N/A	#N/A	GS(1)PLNAAPYGIESMSQDTEVR	-0.336925	0.19824	0.535165	1.97849	LPS up p ≥ -log10 1.3	62		Q92945	KHSRP	P-mim+LPS(133)	P-mim(154)	VQIS(0.004)PDS(0.996)GGLPER	NaN	1.38627	NaN	0	LPS up (LPS only)	113		Q59FH1	TRRAP	#N/A	#N/A	SQS(1)LPGADSLLAKPIDK	NaN	-1.56697	NaN	0	LPS up (LPS only)	51		O75367	H2AFY
Q659E9	DKFZp586H1823	wt+LPS(106)	#N/A	GLAS(1)PTAITPVASAICGK	-1.33111	-0.136626	1.19448	2.47392	LPS up p ≥ -log10 1.3	38		A0A0U1RQZ9	SMARCA2	#N/A	P-mut(86)	GRPPAEKLS(1)PNPPK	0.768912	1.30283	0.533917	1.34704	LPS up p ≥ -log10 1.3	63		Q96AY4	TTC28	P-mim+LPS(133)	P-mim(154)	S(1)QPSPVTVKPKPPAR	NaN	0.273493	NaN	0	LPS up (LPS only)	114		V9HW43	HEL-S-102;HSPB1	#N/A	#N/A	ALS(1)RQLS(0.821)S(0.178)GVS(0.001)EIR	NaN	-0.702569	NaN	0	LPS up (LPS only)	52		V9HWN7	HEL-S-87p;ALDOA
P11388	TOP2A	wt+LPS(106)	#N/A	ELKPQKS(1)VVS(1)DLEADDVK	-0.559199	0.613844	1.17304	1.71325	LPS up p ≥ -log10 1.3	39		P29966	MARCKS	#N/A	P-mut(86)	EAPAEGEAAEPGS(1)PTAAEGEAASAASSTSSPK	1.58795	2.1196	0.531652	1.37764	LPS up p ≥ -log10 1.3	64		Q96BY7	ATG2B	P-mim+LPS(133)	#N/A	S(0.771)VS(0.229)VDESRPELIFR	NaN	-0.742836	NaN	0	LPS up (LPS only)	115		Q7L804	RAB11FIP2	#N/A	C70A(225)	LSSAHS(0.999)MS(0.001)DLSGSHMSSEK	NaN	0.968977	NaN	0	LPS up (LPS only)	53		P05412	JUN
P42224	STAT1	wt+LPS(106)	wt+LPS(162)	LQTTDNLLPMS(1)PEEFDEVSR	-1.50829	-0.353998	1.15429	1.41736	LPS up p ≥ -log10 1.3	40		J3QK86	BAZ2A	P-mut+LPS(81)	P-mut(86)	RRAGDPGEMPQS(1)PTGLGQPK	1.8039	2.32081	0.516908	2.1063	LPS up p ≥ -log10 1.3	65		Q96BY7	ATG2B	P-mim+LPS(133)	P-mim(154)	S(0.015)VS(0.985)VDESRPELIFR	NaN	-0.763604	NaN	0	LPS up (LPS only)	116		Q92788	RRAD;GEM	C70A+LPS(84)	C70A(225)	S(0.003)KS(0.997)CHDLSVL	NaN	-0.948329	NaN	0	LPS up (LPS only)	54		P05412	JUN
Q9H788	SH2D4A	#N/A	wt+LPS(162)	TLS(1)SSAQEDIIR	-1.38618	-0.245618	1.14056	1.68957	LPS up p ≥ -log10 1.3	41		A0A1U9XBD9		#N/A	P-mut(86)	AAESLTAIPEPAS(0.999)PQLLETPIHASQIQK	1.53914	2.05417	0.515032	1.3562	LPS up p ≥ -log10 1.3	66		Q96T23	RSF1	P-mim+LPS(133)	P-mim(154)	VGSPLDYSLVDLPSTNGQS(1)PGK	NaN	-1.28109	NaN	0	LPS up (LPS only)	117		Q92878	RAD50	C70A+LPS(84)	C70A(225)	VFQT(1)EAELQEVISDLQSK	NaN	-2.87343	NaN	0	LPS up (LPS only)	55		P35606	COPB2
Q5U0A0	PSMA5	#N/A	#N/A	RIT(0.081)S(0.918)PLMEPS(0.001)SIEK	-0.393969	0.738167	1.13214	1.41224	LPS up p ≥ -log10 1.3	42		A0A1U9XBE3	MDC1	#N/A	P-mut(86)	AAESLTAIPEPAS(0.999)PQLLETPIHASQIQK	1.53914	2.05417	0.515032	1.3562	LPS up p ≥ -log10 1.3	67		Q9BUA3	C11orf84	P-mim+LPS(133)	#N/A	SHILEQHPHT(0.002)LDLS(0.99)PS(0.008)EK	NaN	-0.612867	NaN	0	LPS up (LPS only)	118		Q96N67	DOCK7	C70A+LPS(84)	C70A(225)	SAVRPAS(1)LNLNR	NaN	-1.01866	NaN	0	LPS up (LPS only)	56		P55265	ADAR
O00231	PSMD11	#N/A	wt+LPS(162)	AQS(1)LLSTDREASIDILHSIVK	-1.97248	-0.84447	1.12801	1.68023	LPS up p ≥ -log10 1.3	43		Q9GZR2	REXO4	P-mut+LPS(81)	P-mut(86)	RAPS(0.932)S(0.068)PVAKPGPVK	2.48487	2.99763	0.512759	1.48308	LPS up p ≥ -log10 1.3	68		Q9BUA3	C11orf84	P-mim+LPS(133)	P-mim(154)	VT(0.005)QQEKT(0.994)PPPRPS(0.001)PLEAGS(0.001)DGCEEPK	NaN	-1.3204	NaN	0	LPS up (LPS only)	119		Q96QR8	PURB	#N/A	C70A(225)	ADGDS(1)GS(1)ERGGGGGPCGFQPASR	NaN	0.584297	NaN	0	LPS up (LPS only)	57		V9HW44	HEL-S-303;PAFAH1B2
O43379	WDR62;DKFZp434J046	wt+LPS(106)	wt+LPS(162)	AGT(0.001)GYAS(0.999)PDRTHVLAAGK	0.493012	1.60316	1.11015	2.717	LPS up p ≥ -log10 1.3	44		F8VY35	NAP1L1	P-mut+LPS(81)	#N/A	LDGLVET(1)PTGYIESLPR	-2.1319	-1.64064	0.491262	1.40602	LPS up p ≥ -log10 1.3	69		Q9H116	GZF1	P-mim+LPS(133)	#N/A	TAEGDVGDY(0.002)RCPQDQS(0.997)PDRVGT(0.001)EMEQVSK	NaN	0.0681225	NaN	0	LPS up (LPS only)	120		Q9H6F5	CCDC86	C70A+LPS(84)	C70A(225)	RLGGLRPESPES(0.004)LT(0.009)S(0.971)VS(0.016)R	NaN	2.71619	NaN	0	LPS up (LPS only)	58		Q09666	AHNAK
Q05519	SRSF11;DKFZp686P22142;DKFZp686D02116;SFRS11	wt+LPS(106)	#N/A	LNHVAAGLVS(1)PSLK	1.11935	2.13926	1.01991	2.56914	LPS up p ≥ -log10 1.3	45		Q03164	KMT2A	P-mut+LPS(81)	#N/A	NSSTPGLQVPVS(0.006)PT(0.994)VPIQNQK	-0.956938	-0.490245	0.466693	1.4013	LPS up p ≥ -log10 1.3	70		Q9H4L5	OSBPL3	P-mim+LPS(133)	P-mim(154)	LHS(0.957)S(0.043)NPNLSTLDFGEEK	NaN	-0.855913	NaN	0	LPS up (LPS only)	121		Q9NYF8	BCLAF1	C70A+LPS(84)	#N/A	S(1)QEEPKDTFEHDPSESIDEFNK	NaN	2.45325	NaN	0	LPS up (LPS only)	59		Q14204	DYNC1H1
G3V497	EML1	wt+LPS(106)	#N/A	KPTGSLPS(0.999)PS(0.001)GVRK	-0.830199	0.183625	1.01382	1.94907	LPS up p ≥ -log10 1.3	46		P52948	NUP98	P-mut+LPS(81)	P-mut(86)	ADTSQEICS(1)PRLPISASHSSK	0.0267317	0.49168	0.464949	1.32816	LPS up p ≥ -log10 1.3	71		Q9NQS7	INCENP	P-mim+LPS(133)	P-mim(154)	T(0.123)LS(0.844)PT(0.031)PAS(0.001)ATAPTSQGIPT(0.479)S(0.479)DEES(0.021)T(0.021)PKK	NaN	-0.0726006	NaN	0	LPS up (LPS only)	122		Q9UBT2	UBA2	C70A+LPS(84)	#N/A	YLFNQLFGEEDADQEVS(1)PDRADPEAAWEPTEAEAR	NaN	-0.239032	NaN	0	LPS up (LPS only)	60		Q9H3U1	UNC45A
B4DLG2	ZC3H11A	wt+LPS(106)	wt+LPS(162)	RLS(0.996)S(0.003)ASTGKPPLSVEDDFEK	0.993137	1.99669	1.00355	2.32991	LPS up p ≥ -log10 1.3	47		M0QZ28	DTNA	#N/A	#N/A	TQFEDLVPS(0.995)PT(0.005)SEK	-0.60027	-0.144354	0.455916	1.39143	LPS up p ≥ -log10 1.3	72		Q9NWD6	RABL6	P-mim+LPS(133)	#N/A	NDSDLFGLGLEEAGPKES(1)S(1)EEGKEGK	NaN	-1.01386	NaN	0	LPS up (LPS only)	123		Q9Y248	GINS2	C70A+LPS(84)	#N/A	LRTNLQPLESTQS(1)QDF	NaN	-0.211384	NaN	0	LPS up (LPS only)	61		Q308M8	RANBP3
D6W648	hCG_2004001;CAMSAP3	wt+LPS(106)	#N/A	KFS(1)PSQVPVQTR	-1.22557	-0.253772	0.971802	1.96858	LPS up p ≥ -log10 1.3	48		A0A024R5M9	NUMA1;NUMA1 variant protein	P-mut+LPS(81)	P-mut(86)	LGS(1)PDYGNSALLSLPGYRPTTR	-0.218012	0.234141	0.452153	1.47591	LPS up p ≥ -log10 1.3	73		Q9NYF8	BCLAF1	P-mim+LPS(133)	#N/A	S(1)QEEPKDTFEHDPSESIDEFNK	NaN	0.848311	NaN	0	LPS up (LPS only)	124		Q9Y4K3	TRAF6	#N/A	#N/A	EGFQPRS(0.001)T(0.999)DAGV	NaN	0.515801	NaN	0	LPS up (LPS only)	62		E7EVA0	MAP4
A0A1U9XBD9		wt+LPS(106)	#N/A	AAESLTAIPEPAS(0.999)PQLLETPIHASQIQK	2.02814	2.98193	0.953783	3.1996	LPS up p ≥ -log10 1.3	49		Q96JM3	CHAMP1	P-mut+LPS(81)	P-mut(86)	KPS(0.998)PS(0.002)ESPEPWK	0.712406	1.15345	0.441042	2.31557	LPS up p ≥ -log10 1.3	74		Q9Y4K3	TRAF6	#N/A	#N/A	EGFQPRS(0.001)T(0.999)DAGV	NaN	1.65373	NaN	0	LPS up (LPS only)	125		Q02952	AKAP12	#N/A	C70A(225)	S(0.073)AES(0.927)PTS(1)PVTSETGSTFKK	NaN	-0.933454	NaN	0	LPS up (LPS only)	63		Q96JM3	CHAMP1
A0A1U9XBE3	MDC1	wt+LPS(106)	#N/A	AAESLTAIPEPAS(0.999)PQLLETPIHASQIQK	2.02814	2.98193	0.953783	3.1996	LPS up p ≥ -log10 1.3	50		A0A024RAM4	MAP1B;DKFZp686F1345	P-mut+LPS(81)	P-mut(86)	LGDVS(1)PTQIDVSQFGSFK	-0.0658595	0.347709	0.413569	1.50546	LPS up p ≥ -log10 1.3	75		Q9Y6A5	TACC3	P-mim+LPS(133)	P-mim(154)	VS(0.017)GS(0.979)PEQAVEENLS(0.001)S(0.001)Y(0.001)S(0.001)LDRR	NaN	-1.51126	NaN	0	LPS up (LPS only)	126		V9HWE1	HEL113;VIM	C70A+LPS(84)	#N/A	ETNLDS(1)LPLVDTHSK	NaN	-1.98972	NaN	0	LPS up (LPS only)	64		A0A140VK53	SRRM2;KIAA0324
A8K2P6	ZNF503	wt+LPS(106)	wt+LPS(162)	TGHILHPEYLQPLPSTPVS(1)PIELDAK	0.10504	1.03319	0.928146	2.05641	LPS up p ≥ -log10 1.3	51		A8K9U6	ZC3HAV1	P-mut+LPS(81)	P-mut(86)	S(0.126)CT(0.874)PS(1)PDQISHR	0.123745	0.526277	0.402532	1.84901	LPS up p ≥ -log10 1.3	76		S4R3H4	ACIN1	P-mim+LPS(133)	#N/A	ASLVALPEQTASEEET(1)PPPLLTK	NaN	-1.21631	NaN	0	LPS up (LPS only)	127		A0A140VK53	SRRM2;KIAA0324	C70A+LPS(84)	C70A(225)	MSCFSRPSMS(0.009)PT(0.991)PLDR	-0.257842	2.34234	2.60018	1.71828	LPS up p ≥ -log10 1.3	1		B4DQF1	GORASP2
Q5VZ89	DENND4C	wt+LPS(106)	wt+LPS(162)	HSQPSPEPHS(1)PTEPPAWGSSIVK	0.102828	1.01636	0.913529	1.83426	LPS up p ≥ -log10 1.3	52		B4DTZ6	SLC9A1	P-mut+LPS(81)	#N/A	INNYLTVPAHKLDS(0.995)PT(0.002)MS(0.003)R	-0.188874	0.0696492	0.258523	1.42917	LPS up p ≥ -log10 1.3	77		U3KPW8	HOMEZ	P-mim+LPS(133)	P-mim(154)	S(0.003)LNERAET(0.997)PPLPIPPPPPDIQPLER	NaN	-1.22637	NaN	0	LPS up (LPS only)	128		P49792	RANBP2;hCG_1994636	C70A+LPS(84)	C70A(225)	HS(0.003)T(0.997)PS(0.214)PT(0.479)RY(0.029)S(0.192)LS(0.061)PS(0.025)K	0.515942	2.48212	1.96618	1.84156	LPS up p ≥ -log10 1.3	2		O60832	DKC1
Q53GG0	LIMA1	wt+LPS(106)	wt+LPS(162)	ETPHS(1)PGVEDAPIAK	1.592	2.50453	0.912523	1.62412	LPS up p ≥ -log10 1.3	53		Q9HCK8	CHD8	P-mut+LPS(81)	#N/A	SRPTPQDY(0.002)EMRVS(0.995)PS(0.002)DTTPLVSR	1.50995	1.74676	0.236805	1.58396	LPS up p ≥ -log10 1.3	78		V9HWE1	HEL113;VIM	P-mim+LPS(133)	#N/A	ETNLDS(1)LPLVDTHSK	NaN	-0.339575	NaN	0	LPS up (LPS only)	129		Q96DV6	RPS6	#N/A	C70A(225)	LS(0.424)S(0.576)LRAS(0.191)T(0.608)S(0.201)KS(0.999)ES(0.071)S(0.929)QK	-1.00674	0.690091	1.69683	1.54254	LPS up p ≥ -log10 1.3	3		J3KQ45	TGOLN2
A0A0S2Q0B1	ARID1A;ARID1A variant protein	wt+LPS(106)	#N/A	TPQPSS(1)PMDQMGK	-0.884841	-0.00518682	0.879654	2.2301	LPS up p ≥ -log10 1.3	54		Q4VB24	HIST1H1E	#N/A	P-mut(86)	S(0.25)ET(0.75)APAAPAAPAPAEKT(1)PVKK	2.4254	2.12172	-0.303688	1.67652	LPS down p ≥ -log10 1.3	1		V9HWE1	HEL113;VIM	P-mim+LPS(133)	#N/A	ISLPLPNFS(0.913)S(0.087)LNLR	NaN	-2.45393	NaN	0	LPS up (LPS only)	130		A0A0C4DG07	NBN;NBS1	C70A+LPS(84)	C70A(225)	MRIPNYQLS(1)PTKLPSINK	0.255357	1.81494	1.55958	2.01018	LPS up p ≥ -log10 1.3	4		A0A024RAM4	MAP1B;DKFZp686F1345
A0A075B7F8	POM121C;POM121	wt+LPS(106)	wt+LPS(162)	APPTLQAETATKPQATSAPS(1)PAPK	0.27945	1.15218	0.872725	1.35605	LPS up p ≥ -log10 1.3	55		A0A024RD47	NCOR1	P-mut(34)	P-mut(86)	RES(1)PPIRAFEGAITK	0.112162	-0.247517	-0.359679	1.48271	LPS down p ≥ -log10 1.3	2		X6RGK9	SLAIN1	P-mim+LPS(133)	P-mim(154)	NSQS(1)FDSSLHGAGNGISR	NaN	-0.635724	NaN	0	LPS up (LPS only)	131		Q9H6F5	CCDC86	C70A+LPS(84)	C70A(225)	AGLGS(0.998)PERPPKT(0.783)S(0.219)PGS(1)PR	0.488796	2.03366	1.54486	1.33302	LPS up p ≥ -log10 1.3	5		J3QR29	CDK11B;CDC2L1;CDC2L2;CDK11A
A0A0S2Q0B1	ARID1A;ARID1A variant protein	wt+LPS(106)	wt+LPS(162)	S(0.699)NS(0.301)VGIQDAFNDGSDSTFQK	-1.01199	-0.154974	0.857017	1.85039	LPS up p ≥ -log10 1.3	56		V9HVZ4	HEL-S-162eP;GAPDH	P-mut(34)	P-mut(86)	VIHDNFGIVEGLMTTVHAIT(0.001)AT(0.999)QK	-1.37609	-1.76671	-0.390626	1.81386	LPS down p ≥ -log10 1.3	3		Q13263	TRIM28	#N/A	#N/A	GAAAAATGQPGTAPAGT(1)PGAPPLAGMAIVK	-0.259722	3.11838	3.3781	1.95232	LPS up p ≥ -log10 1.3	1		P49006	MARCKSL1	C70A+LPS(84)	C70A(225)	PFKLS(1)GLS(1)FKR	1.44653	2.99041	1.54389	1.70462	LPS up p ≥ -log10 1.3	6		E7EVA0	MAP4
B2R7D3	REPS1	wt+LPS(106)	wt+LPS(162)	LKS(1)EDELRPEVDEHTQK	0.471772	1.3136	0.841827	1.54488	LPS up p ≥ -log10 1.3	57		E7ETY2	TCOF1	P-mut(34)	#N/A	QEAKPQQAAGMLS(1)PK	2.25671	1.8363	-0.420404	1.32927	LPS down p ≥ -log10 1.3	4		V9HW43	HEL-S-102;HSPB1	#N/A	#N/A	ALS(1)RQLS(0.821)S(0.178)GVS(0.001)EIR	-1.33016	1.56872	2.89887	1.52289	LPS up p ≥ -log10 1.3	2		Q6PKG0	LARP1	C70A+LPS(84)	C70A(225)	NALPPVLTTVNGQS(1)PPEHSAPAK	1.26062	2.71462	1.454	1.43452	LPS up p ≥ -log10 1.3	7		B4DY33	KIAA0415;FOXK1
A9CQZ8	TJP1;DKFZp686A1195;DKFZp686M05161	wt+LPS(106)	#N/A	AIPVS(0.986)PS(0.014)AVEEDEDEDGHTVVATAR	0.801287	1.62745	0.826166	1.92977	LPS up p ≥ -log10 1.3	58		Q8IZ21	PHACTR4	P-mut(34)	P-mut(86)	S(0.5)PS(0.5)PPLPTHIPPEPPRT(1)PPFPAK	-0.336587	-0.766979	-0.430392	1.48571	LPS down p ≥ -log10 1.3	5		P60866	RPS20	#N/A	#N/A	DTGKT(1)PVEPEVAIHR	-1.03666	1.62565	2.6623	5.10893	LPS up p ≥ -log10 1.3	3		B4DNI1	SZRD1	#N/A	C70A(225)	S(1)KS(1)PPKVPIVIQDDSLPAGPPPQIR	1.81795	3.2179	1.39996	1.30661	LPS up p ≥ -log10 1.3	8		B4DY33	KIAA0415;FOXK1
B4DUJ0	PSMF1	wt+LPS(106)	#N/A	ANVS(0.033)S(0.967)PHREFPPATAR	1.32374	2.14625	0.822506	2.29944	LPS up p ≥ -log10 1.3	59		Q8IZ21	PHACTR4	P-mut(34)	P-mut(86)	S(0.156)PS(0.844)PPLPT(0.065)HIPPEPPRT(0.936)PPFPAK	-0.213675	-0.689275	-0.4756	2.9073	LPS down p ≥ -log10 1.3	6		A8K964	PNN	#N/A	#N/A	GFS(1)DSGGGPPAK	0.732183	3.21332	2.48114	3.77889	LPS up p ≥ -log10 1.3	4		A0A140VK53	SRRM2;KIAA0324	C70A+LPS(84)	C70A(225)	VKPET(1)PPRQS(0.056)HS(0.354)GS(0.575)IS(0.015)PYPK	1.22939	2.60598	1.37658	2.11223	LPS up p ≥ -log10 1.3	9		K7EIY0	PTPN2
E7EVA0	MAP4	#N/A	wt+LPS(162)	DMES(1)PTKLDVTLAK	3.14364	3.95856	0.814924	1.36719	LPS up p ≥ -log10 1.3	60		Q8IZ21	PHACTR4	P-mut(34)	P-mut(86)	S(0.887)PS(0.113)PPLPT(0.05)HIPPEPPRT(0.95)PPFPAK	-0.213675	-0.782759	-0.569084	2.41736	LPS down p ≥ -log10 1.3	7		V9HW43	HEL-S-102;HSPB1	#N/A	P-mim(154)	GPS(1)WDPFRDWYPHSR	-1.56474	0.90381	2.46855	1.61767	LPS up p ≥ -log10 1.3	5		E7EVA0	MAP4	C70A+LPS(84)	C70A(225)	DMS(1)PLSETEMALGK	-1.86828	-0.503428	1.36485	1.61661	LPS up p ≥ -log10 1.3	10		Q96JM3	CHAMP1
M0QZ28	DTNA	wt+LPS(106)	wt+LPS(162)	TQFEDLVPS(0.995)PT(0.005)SEK	-0.602879	0.20626	0.809139	1.77208	LPS up p ≥ -log10 1.3	61		Q5VU08	ADD3	P-mut(34)	P-mut(86)	IEEVLSPEGSPSKS(1)PSK	0.491966	-0.119078	-0.611044	1.31739	LPS down p ≥ -log10 1.3	8		A0A140VK53	SRRM2;KIAA0324	#N/A	#N/A	TPAAAAAMNLAS(1)PR	1.03534	3.2761	2.24075	4.37443	LPS up p ≥ -log10 1.3	6		Q6IT96	HDAC1;DKFZp686H12203	C70A+LPS(84)	C70A(225)	MLPHAPGVQMQAIPEDAIPEES(1)GDEDEDDPDKR	1.78578	3.05852	1.27275	1.37329	LPS up p ≥ -log10 1.3	11		A0A024R1U0	RANGAP1
B7ZLW1	CAMSAP1	wt+LPS(106)	wt+LPS(162)	APVHFVEPLS(0.998)PT(0.002)GVAGHRK	-0.801677	-0.0151788	0.786499	1.98702	LPS up p ≥ -log10 1.3	62		Q7Z5L9	IRF2BP2	P-mut(34)	P-mut(86)	LEEPPELNRQS(1)PNPRR	2.68632	2.07122	-0.615096	1.56067	LPS down p ≥ -log10 1.3	9		A0A1U9X839	NELFE;RDBP;NELF-E	#N/A	#N/A	RSLS(1)EQPVMDTATATEQAK	-0.430775	1.7831	2.21387	3.07044	LPS up p ≥ -log10 1.3	7		A0A140VK53	SRRM2;KIAA0324	C70A+LPS(84)	C70A(225)	MSCFSRPSMS(1)PTPLDR	1.67743	2.9063	1.22887	1.3195	LPS up p ≥ -log10 1.3	12		Q7Z3K6	MIER3
P05412	JUN	wt+LPS(106)	#N/A	LAS(1)PELER	1.61574	2.39774	0.781998	2.02803	LPS up p ≥ -log10 1.3	63		P41208	CETN2	P-mut(34)	#N/A	RMS(1)PKPELTEEQK	1.25418	0.571994	-0.682188	2.86256	LPS down p ≥ -log10 1.3	10		P51610	HCFC1	#N/A	#N/A	TITLVKS(1)PISVPGGSALISNLGK	-1.08815	0.968369	2.05651	1.79967	LPS up p ≥ -log10 1.3	8		A0A024R5U7	SLTM	C70A+LPS(84)	C70A(225)	IS(0.026)S(0.973)KS(0.001)PGHMVILDQTK	-0.151269	1.0444	1.19567	1.68041	LPS up p ≥ -log10 1.3	13		E5KTA5	UNG;DKFZp781L1143
P17535	JUND	wt+LPS(106)	#N/A	LAS(1)PELER	1.61574	2.39774	0.781998	2.02803	LPS up p ≥ -log10 1.3	64		H3BQZ7	HNRNPUL2-BSCL2;HNRNPUL2	P-mut(34)	P-mut(86)	S(1)GDETPGSEVPGDK	0.184747	-0.663602	-0.848349	2.19819	LPS down p ≥ -log10 1.3	11		B4DJ44	TOM1	#N/A	#N/A	AADRLPNLS(0.906)S(0.093)PS(0.002)AEGPPGPPSGPAPR	0.211857	2.10504	1.89318	1.43856	LPS up p ≥ -log10 1.3	9		Q9Y6D5	ARFGEF2	C70A+LPS(84)	C70A(225)	PQSPVIQAAAVS(1)PK	0.117295	1.25293	1.13563	2.29648	LPS up p ≥ -log10 1.3	14		P26368	U2AF2
Q2L6I0	PPP1R10	wt+LPS(106)	#N/A	VLS(1)PTAAKPSPFEGK	0.0668523	0.83819	0.771338	1.49661	LPS up p ≥ -log10 1.3	65		Q1JQ81	BCL9	P-mut(34)	P-mut(86)	PAAPPRPLDRES(1)PGVENK	1.64808	0.742596	-0.905484	1.40457	LPS down p ≥ -log10 1.3	12		B3KSZ4	GATAD2B	#N/A	#N/A	LQQQAALS(0.999)PT(0.001)TAPAVSSVSK	-0.142596	1.74678	1.88937	4.93164	LPS up p ≥ -log10 1.3	10		B4DTZ6	SLC9A1	C70A+LPS(84)	#N/A	INNYLTVPAHKLDS(0.995)PT(0.002)MS(0.003)R	-1.34422	-0.216977	1.12725	1.59827	LPS up p ≥ -log10 1.3	15		Q59FW1	MTA1
A8K3M3	PTPN1	wt+LPS(106)	wt+LPS(162)	GS(1)PLNAAPYGIESMSQDTEVR	-0.309012	0.460432	0.769443	1.37274	LPS up p ≥ -log10 1.3	66		F8WD88	CENPA	P-mut(34)	P-mut(86)	RRS(1)PSPTPTPGPS(1)R	2.19879	1.22621	-0.972588	1.75951	LPS down p ≥ -log10 1.3	13		P42566	EPS15	#N/A	#N/A	RSINKLDS(1)PDPFK	-0.200576	1.49816	1.69873	4.01373	LPS up p ≥ -log10 1.3	11		B2RCD8	IRF2BP1	C70A+LPS(84)	C70A(225)	HWVAPGGPYSAETPGVPS(1)PIAALK	-1.43681	-0.366488	1.07032	2.40692	LPS up p ≥ -log10 1.3	16		Q2L6I0	PPP1R10
B4DZG6	NDC1	wt+LPS(106)	wt+LPS(162)	KLNS(1)PEETAFQTPK	-0.638851	0.0955741	0.734425	1.36265	LPS up p ≥ -log10 1.3	67		Q5QJ74	TBCEL	P-mut(34)	P-mut(86)	RGPGMGVHVPAT(0.001)PQGS(0.999)PMK	-0.259828	-1.31493	-1.0551	1.42878	LPS down p ≥ -log10 1.3	14		O00567	NOP56	P-mim+LPS(133)	P-mim(154)	SFSKEELMS(1)S(1)DLEETAGSTSIPK	0.755521	2.43823	1.68271	1.60702	LPS up p ≥ -log10 1.3	12		P20700	LMNB1	C70A+LPS(84)	#N/A	AGGPTTPLS(0.023)PT(0.977)RLSR	0.0623771	1.07324	1.01087	1.41815	LPS up p ≥ -log10 1.3	17		E5KTA5	UNG;DKFZp781L1143
I3L0X5	SPAG7	wt+LPS(106)	wt+LPS(162)	ELAQRQEEEAAQQGPVVVS(0.999)PAS(0.001)DYK	0.22466	0.949279	0.724619	1.31546	LPS up p ≥ -log10 1.3	68		F8WA39	MTMR1	P-mut(34)	P-mut(86)	AAGGAT(0.001)AGS(0.006)RQPS(0.991)VET(0.002)LDSPTGSHVEWCK	1.43675	0.0715938	-1.36516	1.68782	LPS down p ≥ -log10 1.3	15		P05412	JUN	#N/A	#N/A	NSDLLT(1)SPDVGLLK	0.502652	2.17083	1.66818	4.20256	LPS up p ≥ -log10 1.3	13		A0A087X1U6	EPPK1	C70A+LPS(84)	C70A(225)	RQVS(1)ASELHTSGILGPETLR	2.22758	3.1856	0.958016	1.54172	LPS up p ≥ -log10 1.3	18		A0A024RBE7	TMPO
A0A087WVZ6	ZMYND8;DKFZp564P1772	wt+LPS(106)	wt+LPS(162)	ELSESVQQQSTPVPLIS(1)PK	0.129697	0.811905	0.682208	2.58164	LPS up p ≥ -log10 1.3	69				#N/A	#N/A									Q59F73	ADRBK1	P-mim+LPS(133)	P-mim(154)	NKPRS(1)PVVELSK	-0.872857	0.702111	1.57497	2.38123	LPS up p ≥ -log10 1.3	14		C9JRJ5	LIMD1	C70A+LPS(84)	C70A(225)	S(0.046)NS(0.954)GLGGEVSGVMSK	-0.95856	-0.042394	0.916166	2.33464	LPS up p ≥ -log10 1.3	19		Q71UH4	TOP2B
A2A2D0	STMN1	wt+LPS(106)	#N/A	RAS(1)GQAFELILS(1)PR	1.07526	1.75017	0.674915	1.45376	LPS up p ≥ -log10 1.3	70				#N/A	#N/A									A0A024R4X7	hCG_1989366;NUP50	#N/A	P-mim(154)	VAAETQS(1)PSLFGSTK	-0.629042	0.92978	1.55882	2.87474	LPS up p ≥ -log10 1.3	15		G1UI22	MLLT4	C70A+LPS(84)	C70A(225)	NRADHRS(0.987)S(0.013)PNVANQPPS(1)PGGK	-0.711354	0.160441	0.871795	1.34942	LPS up p ≥ -log10 1.3	20		O94826	TOMM70A
E9PGT3	RPS6KA1	wt+LPS(106)	wt+LPS(162)	T(1)PKDSPGIPPSAGAHQLFR	-0.111436	0.552332	0.663768	1.40644	LPS up p ≥ -log10 1.3	71				#N/A	#N/A									Q14684	RRP1B	P-mim+LPS(133)	P-mim(154)	SILVS(0.997)PT(0.002)GPSR	-0.965416	0.563849	1.52927	3.36812	LPS up p ≥ -log10 1.3	16		Q9Y5B6	PAXBP1;C21orf66	#N/A	C70A(225)	GRLVREDENDAS(1)DDEDDDEK	-0.905123	-0.035641	0.869482	1.53369	LPS up p ≥ -log10 1.3	21		A0A087X2D8	SPAG9
O95785	WIZ	wt+LPS(106)	wt+LPS(162)	KTPLALAGS(1)PTPK	0.333962	0.994375	0.660413	3.26278	LPS up p ≥ -log10 1.3	72				#N/A	#N/A									C9JA69	BBX	P-mim+LPS(133)	P-mim(154)	WCPTTNKPVKS(0.993)PT(0.007)PT(0.001)VNPR	0.0910383	1.61824	1.5272	2.20605	LPS up p ≥ -log10 1.3	17		B7Z3F1	LIMCH1	C70A+LPS(84)	C70A(225)	VVKPKS(1)PEPEATLTFPFLDK	-0.732559	0.110965	0.843524	2.26572	LPS up p ≥ -log10 1.3	22		A0A024RBR3	DENR
A0A087WU64	POLA1	wt+LPS(106)	wt+LPS(162)	IAS(0.999)PVS(0.001)RKEPPLTPVPLK	0.178067	0.791547	0.61348	1.6071	LPS up p ≥ -log10 1.3	73				#N/A	#N/A									B9EIS5	PCM1	#N/A	#N/A	Y(1)MS(1)QMS(1)VPEQAELEK	0.109237	1.63011	1.52088	3.29107	LPS up p ≥ -log10 1.3	18		E7EVA0	MAP4	#N/A	C70A(225)	DMES(1)PTKLDVTLAK	2.77042	3.55827	0.787857	1.99969	LPS up p ≥ -log10 1.3	23		P29966	MARCKS
E9PF10	NUP155	wt+LPS(106)	#N/A	AAPQS(0.975)PS(0.025)VPK	1.14119	1.74753	0.606345	2.85426	LPS up p ≥ -log10 1.3	74				#N/A	#N/A									Q5U0A0	PSMA5	#N/A	#N/A	RIT(0.081)S(0.918)PLMEPS(0.001)SIEK	-0.679925	0.832083	1.51201	1.98634	LPS up p ≥ -log10 1.3	19		B9EIS5	PCM1	#N/A	#N/A	Y(1)MS(1)QMS(1)VPEQAELEK	-0.407348	0.378795	0.786143	3.99878	LPS up p ≥ -log10 1.3	24		Q4VB24	HIST1H1E
O75151	PHF2	wt+LPS(106)	wt+LPS(162)	ALRPPT(0.088)S(0.912)PGVFGALQNFK	-0.972346	-0.366932	0.605414	1.37525	LPS up p ≥ -log10 1.3	75				#N/A	#N/A									A0A075B7F8	POM121C;POM121	#N/A	#N/A	APPTLQAETATKPQATSAPS(1)PAPK	-0.358913	1.15119	1.5101	3.10102	LPS up p ≥ -log10 1.3	20		B3KW05	GPRASP2	C70A+LPS(84)	C70A(225)	S(0.076)T(0.076)S(0.848)PFGIPEEASEMLEAKPK	0.238591	1.00246	0.763872	1.79681	LPS up p ≥ -log10 1.3	25		Q8N9T8	KRI1
A7E234	ZNF644	wt+LPS(106)	wt+LPS(162)	HVVS(1)PEQIATSDK	-1.61149	-1.06684	0.544658	1.53994	LPS up p ≥ -log10 1.3	76				#N/A	#N/A									Q9BTC0	DIDO1	#N/A	#N/A	RNS(1)VERPAEPVAGAATPSLVEQQK	1.10032	2.57735	1.47704	4.90331	LPS up p ≥ -log10 1.3	21		Q9H501	ESF1	C70A+LPS(84)	C70A(225)	FKIDSNIS(1)PKK	0.471182	1.21396	0.742782	2.03248	LPS up p ≥ -log10 1.3	26		A8K3Z5	NUP35
Q02952	AKAP12	#N/A	#N/A	SPPS(1)PVER	-0.707613	-0.175376	0.532236	3.23023	LPS up p ≥ -log10 1.3	77				#N/A	#N/A									Q4LE74	MYO9B variant protein;MYO9B	#N/A	#N/A	KKPGDASSLPDAGLS(0.996)PGS(0.004)QVDSK	-0.242274	1.18634	1.42861	2.16768	LPS up p ≥ -log10 1.3	22		P17096	HMGA1	C70A+LPS(84)	C70A(225)	KQPPVS(1)PGTALVGSQK	0.114192	0.844783	0.730592	1.38455	LPS up p ≥ -log10 1.3	27		Q6PKG0	LARP1
A0A140VK53	SRRM2;KIAA0324	wt+LPS(106)	wt+LPS(162)	VS(0.004)GRT(0.977)S(0.019)PPLLDR	4.2468	4.76736	0.520556	1.70476	LPS up p ≥ -log10 1.3	78				#N/A	#N/A									Q9P0K7	RAI14	#N/A	P-mim(154)	ISQDADLKT(0.999)PT(0.001)KPK	-1.11226	0.297775	1.41003	1.37352	LPS up p ≥ -log10 1.3	23		A8K564	WDR70	C70A+LPS(84)	C70A(225)	TMFAQVES(1)DDEEAKNEPEWKK	2.03693	2.73223	0.695294	1.9805	LPS up p ≥ -log10 1.3	28		B4DYY5	UBAP2L
Q5VT52	RPRD2	wt+LPS(106)	#N/A	RMS(1)GEPIQTVESIRVPGK	-0.0832874	0.409017	0.492304	1.60261	LPS up p ≥ -log10 1.3	79				#N/A	#N/A									O15085	ARHGEF11	#N/A	#N/A	SSSQSTFHIPLS(1)PVEVKPGNVR	-1.12687	0.246197	1.37307	1.92099	LPS up p ≥ -log10 1.3	24		Q6IAZ3	VAMP4	C70A+LPS(84)	C70A(225)	RNLLEDDS(1)DEEEDFFLRGPSGPR	-1.08822	-0.405879	0.682341	1.36534	LPS up p ≥ -log10 1.3	29		Q9H7S9	ZNF703
Q86X27	RALGPS2	wt+LPS(106)	wt+LPS(162)	S(0.141)AAS(0.859)REDLVGPEVGASPQSGRK	-0.730555	-0.247839	0.482716	1.6885	LPS up p ≥ -log10 1.3	80				#N/A	#N/A									P20700	LMNB1	P-mim+LPS(133)	P-mim(154)	AGGPTT(1)PLSPTR	-0.593648	0.775119	1.36877	1.49986	LPS up p ≥ -log10 1.3	25		Q05BS8	SFRS2IP;SCAF11	C70A+LPS(84)	#N/A	TEELIES(1)PKLESSEGEIIQTVDR	-0.277764	0.394285	0.672049	3.11192	LPS up p ≥ -log10 1.3	30		A0A0G2JNN3	LENG8
B4DL70	TIMELESS	wt+LPS(106)	#N/A	KAGLAS(1)PEEEDAVGKEPLK	-0.223523	0.259049	0.482572	1.34229	LPS up p ≥ -log10 1.3	81				#N/A	#N/A									Q9HA47	UCK1	#N/A	#N/A	RTFS(1)EPGDHPGMLTSGK	0.899362	2.24418	1.34482	3.1224	LPS up p ≥ -log10 1.3	26		Q9H7E9	C8orf33	C70A+LPS(84)	C70A(225)	AALGHLAGEAAAAPGPGT(1)PCASR	-0.63546	-0.0193731	0.616087	1.36781	LPS up p ≥ -log10 1.3	31		Q13501	SQSTM1
A0A140VK53	SRRM2;KIAA0324	wt+LPS(106)	wt+LPS(162)	DKFS(1)PFPVQDRPESSLVFK	1.52668	1.95177	0.425087	1.51614	LPS up p ≥ -log10 1.3	82				#N/A	#N/A									Q05519	SRSF11;DKFZp686P22142;DKFZp686D02116;SFRS11	#N/A	#N/A	LNHVAAGLVS(1)PSLK	0.879738	2.17174	1.292	2.08441	LPS up p ≥ -log10 1.3	27		B4DJX4	PLEKHA5	C70A+LPS(84)	C70A(225)	AKS(1)PTPESSTIASYVTLRK	1.16277	1.7564	0.59363	1.53841	LPS up p ≥ -log10 1.3	32		Q8NAF0	ZNF579
Q6NZY4	ZCCHC8	wt+LPS(106)	#N/A	IHS(1)PIPDMSK	-0.978141	-0.556969	0.421171	1.5647	LPS up p ≥ -log10 1.3	83				#N/A	#N/A									Q7RTP6	MICAL3	P-mim+LPS(133)	#N/A	DRLGS(1)PLAVDEALRR	-1.20557	0.0810091	1.28658	2.53913	LPS up p ≥ -log10 1.3	28		F5H7D6	TLE3	C70A+LPS(84)	C70A(225)	ERESSANNSVS(1)PSESLR	-0.283962	0.294514	0.578476	2.11873	LPS up p ≥ -log10 1.3	33		Q5JVS0	HABP4
Q5T6F0	DCAF12	wt+LPS(106)	wt+LPS(162)	APAS(1)PGAGSDAQGPQFGWDHSLHK	-0.514459	-0.0933802	0.421079	1.56947	LPS up p ≥ -log10 1.3	84				#N/A	#N/A									Q01804	OTUD4	P-mim+LPS(133)	P-mim(154)	TAADVVS(1)PGANSVDSR	-1.35573	-0.107458	1.24827	1.95486	LPS up p ≥ -log10 1.3	29		B4DJ44	TOM1	#N/A	#N/A	AADRLPNLS(0.906)S(0.093)PS(0.002)AEGPPGPPSGPAPR	-0.319871	0.248923	0.568795	1.85444	LPS up p ≥ -log10 1.3	34		A0A024QZQ1	SIRT1
B4DMD3	WBP11	wt+LPS(106)	#N/A	RRDEDMLYS(1)PELAQR	0.148104	0.568823	0.420718	2.28899	LPS up p ≥ -log10 1.3	85				#N/A	#N/A									O95785	WIZ	#N/A	P-mim(154)	KLPPPPGS(1)PLGHS(0.996)PT(0.003)AS(0.001)PPPTAR	-0.181839	1.02746	1.2093	1.91842	LPS up p ≥ -log10 1.3	30		P11388	TOP2A	C70A+LPS(84)	C70A(225)	SKGESDDFHMDFDS(1)AVAPR	-1.008	-0.461538	0.546462	2.64634	LPS up p ≥ -log10 1.3	35		B5MBZ0	EML4;EML4/ALK fusion;EML4-ALK variant 6;EML4-ALK variant 7;EML4-ALK
A0A024RCR5	BRD2	wt+LPS(106)	#N/A	RKADTTTPTPTAILAPGS(1)PAS(0.999)PPGS(0.001)LEPK	2.8394	3.15929	0.319891	1.53134	LPS up p ≥ -log10 1.3	86				#N/A	#N/A									P46013	MKI67	P-mim+LPS(133)	P-mim(154)	IACRS(1)PQPDPVGT(0.993)PT(0.007)IFKPQSK	1.53083	2.72353	1.1927	1.90687	LPS up p ≥ -log10 1.3	31		H3BR51	ARHGAP11A	C70A+LPS(84)	C70A(225)	RRQS(1)VGDFVSGALNK	-1.12254	-0.595756	0.526787	1.72603	LPS up p ≥ -log10 1.3	36		P67809	YBX1
Q13263	TRIM28	wt+LPS(106)	#N/A	S(1)GEGEVSGLMRK	2.66667	2.9512	0.28453	2.39268	LPS up p ≥ -log10 1.3	87				#N/A	#N/A									Q05DC0	RNF20	P-mim+LPS(133)	P-mim(154)	S(0.019)GS(0.06)ALLQS(0.822)QS(0.788)S(0.239)T(0.071)EDPKDEPAELKPDSEDLSSQSSASK	0.493287	1.67025	1.17696	1.69616	LPS up p ≥ -log10 1.3	32		Q9HCK8	CHD8	C70A+LPS(84)	#N/A	SRPTPQDY(0.002)EMRVS(0.995)PS(0.002)DTTPLVSR	0.99961	1.51538	0.515769	2.3997	LPS up p ≥ -log10 1.3	37		D6RF40	SKP2
A8K940	MAP1S	wt+LPS(106)	wt+LPS(162)	AVPMAPAPAS(0.997)PGS(0.002)SNDSSAR	1.56539	1.81885	0.253466	1.37067	LPS up p ≥ -log10 1.3	88				#N/A	#N/A									A0A0S2Q0B1	ARID1A;ARID1A variant protein	#N/A	#N/A	TPQPSS(1)PMDQMGK	-1.10225	0.0670334	1.16928	1.32691	LPS up p ≥ -log10 1.3	33		B7Z954	TJP2	C70A+LPS(84)	C70A(225)	AYS(1)PEYR	-0.100051	0.411024	0.511074	1.57068	LPS up p ≥ -log10 1.3	38		B2R4C9	DAP
Q53GX4	FKBP5	wt+LPS(106)	#N/A	NNEES(1)PTATVAEQGEDITSKK	-0.562205	-0.396276	0.16593	1.39872	LPS up p ≥ -log10 1.3	89				#N/A	#N/A									D6W648	hCG_2004001;CAMSAP3	#N/A	#N/A	KFS(1)PSQVPVQTR	-1.05141	0.0983266	1.14974	2.62873	LPS up p ≥ -log10 1.3	34		H7BYN4	KIF23	C70A+LPS(84)	C70A(225)	RRS(0.898)S(0.067)T(0.035)VAPAQPDGAESEWTDVETR	1.60044	2.09814	0.497702	2.21602	LPS up p ≥ -log10 1.3	39		P41236	PPP1R2;PPP1R2P3
Q9P0K7	RAI14	wt(166)	wt+LPS(162)	ISQDADLKT(0.999)PT(0.001)KPK	-0.139399	-0.301111	-0.161712	1.52527	LPS down p ≥ -log10 1.3	1				#N/A	#N/A									Q549C5	MST065;TOMM22	P-mim+LPS(133)	#N/A	AAAVAAAGAGEPQS(1)PDELLPK	-1.52137	-0.381829	1.13954	1.96254	LPS up p ≥ -log10 1.3	35		B4DR80	STK24;HEL-S-95	C70A+LPS(84)	C70A(225)	AHS(1)PVQSGLPGMQNLK	0.580441	0.992968	0.412527	1.65594	LPS up p ≥ -log10 1.3	40		A0A087WW59	C11orf96
O60825	PFKFB2;DKFZp781D2217	wt(166)	wt+LPS(162)	RNS(1)FTPLSSSNTIR	-0.154221	-0.512414	-0.358193	1.75402	LPS down p ≥ -log10 1.3	2				#N/A	#N/A									Q9NZB2	FAM120A;C9orf129	P-mim+LPS(133)	P-mim(154)	PVAPQVPS(0.998)PGGAPGQGPY(0.002)PYSLSEPAPLTLDTSGK	-0.184991	0.950496	1.13549	1.42656	LPS up p ≥ -log10 1.3	36		B8Y6Z5	ILKAP;ILKAP2;ILKAP3	C70A+LPS(84)	C70A(225)	MDLFGDLPEPERS(1)PRPAAGK	1.14317	1.53873	0.395555	1.93414	LPS up p ≥ -log10 1.3	41		Q71UH4	TOP2B
H7C3Q7	ABI2;ABI-2;argBPIB	wt(166)	wt+LPS(162)	TTPPTQKPPS(1)PPMSGK	0.96979	0.586715	-0.383074	1.68359	LPS down p ≥ -log10 1.3	3				#N/A	#N/A									P05412	JUN	#N/A	#N/A	LAS(1)PELER	1.57002	2.67917	1.10915	2.75965	LPS up p ≥ -log10 1.3	37		O95295	SNAPIN	C70A+LPS(84)	C70A(225)	AMLDSGIYPPGS(1)PGK	-0.61142	-0.217755	0.393665	1.44628	LPS up p ≥ -log10 1.3	42		A0A024R7K7	GATAD2A
E5RIA0	SORBS3	#N/A	#N/A	ADGGS(1)PFLGRR	-0.356707	-0.819314	-0.462607	1.41572	LPS down p ≥ -log10 1.3	4				#N/A	#N/A									P17535	JUND	#N/A	#N/A	LAS(1)PELER	1.57002	2.67917	1.10915	2.75965	LPS up p ≥ -log10 1.3	38		A0A140VKC4	MECP2	C70A+LPS(84)	C70A(225)	MPFQT(0.05)S(0.95)PGGK	-0.887554	-0.495933	0.391621	1.33958	LPS up p ≥ -log10 1.3	43		Q9Y4H2	IRS2
A0A024R6M3	PAPOLA	wt(166)	wt+LPS(162)	HYGITS(1)PISLAAPK	-0.0911768	-0.553802	-0.462626	1.58093	LPS down p ≥ -log10 1.3	5				#N/A	#N/A									P49454	CENPF	P-mim+LPS(133)	#N/A	VAQRS(1)PVDSGTILREPTTK	0.0950826	1.19432	1.09923	1.93932	LPS up p ≥ -log10 1.3	39		Q9NR30	DDX21	C70A+LPS(84)	C70A(225)	LRSDAGLES(1)DTAMK	1.18446	1.57027	0.385808	1.50003	LPS up p ≥ -log10 1.3	44		E7ESG2	CLSPN
A0A024R637	TBC1D4	wt(166)	wt+LPS(162)	AQGVRS(1)PLLR	0.642108	0.17405	-0.468058	3.74873	LPS down p ≥ -log10 1.3	6				#N/A	#N/A									B4DM85	KIF2A	P-mim+LPS(133)	P-mim(154)	ARPSQFPEQSSSAQQNGSVSDIS(1)PVQAAKK	-0.144871	0.887299	1.03217	1.47125	LPS up p ≥ -log10 1.3	40		O00567	NOP56	C70A+LPS(84)	C70A(225)	FSKEEPVS(1)S(1)GPEEAVGK	3.09585	3.4677	0.371852	1.46173	LPS up p ≥ -log10 1.3	45		Q8N995	HMGCS1
Q5JU47	TBC1D4	wt(166)	wt+LPS(162)	AQGVRS(1)PLLR	0.642108	0.17405	-0.468058	3.74873	LPS down p ≥ -log10 1.3	7				#N/A	#N/A									B3KNT3	SRA1	P-mim+LPS(133)	P-mim(154)	APRS(1)PPVGSGPASGVEPTSFPVESEAR	2.14686	3.17607	1.02921	1.64834	LPS up p ≥ -log10 1.3	41		G8JLD5	DNM1L	C70A+LPS(84)	C70A(225)	SKPIPIMPAS(1)PQK	2.6517	3.01966	0.367961	1.65716	LPS up p ≥ -log10 1.3	46		P41236	PPP1R2;PPP1R2P3
Q96T58	SPEN	wt(166)	#N/A	HGS(1)FHEDEDPIGS(1)PR	1.66414	1.16696	-0.497184	1.45991	LPS down p ≥ -log10 1.3	8				#N/A	#N/A									A0A024RA49	ANLN	P-mim+LPS(133)	P-mim(154)	NKAS(1)PQSEFMPSK	0.0116432	1.01557	1.00392	2.12804	LPS up p ≥ -log10 1.3	42		B3KSP0	WHSC2;NELFA	C70A+LPS(84)	C70A(225)	EASRPPEEPSAPS(1)PTLPAQFK	0.95737	1.30909	0.351724	1.30202	LPS up p ≥ -log10 1.3	47		A0A0A0MRA8	EPB41L3
D9YZV9	BCL11A	wt(166)	wt+LPS(162)	S(0.001)GT(0.001)GS(0.99)GGS(0.005)T(0.003)PHISGPGPGRPSSK	-0.0315654	-0.542383	-0.510818	2.16599	LPS down p ≥ -log10 1.3	9				#N/A	#N/A									Q8TB72	PUM2	P-mim+LPS(133)	#N/A	DFNRT(0.002)PGS(0.997)RQAS(0.915)PT(0.085)EVVER	-0.251898	0.749489	1.00139	2.25348	LPS up p ≥ -log10 1.3	43		Q5U0A0	PSMA5	#N/A	#N/A	RIT(0.081)S(0.918)PLMEPS(0.001)SIEK	-0.484863	-0.189423	0.29544	1.7346	LPS up p ≥ -log10 1.3	48		Q59GV6	STRN4
A0A024R5U3	ARPP-19;ARPP19	wt(166)	#N/A	EMEDKVT(1)SPEKAEEAK	-0.0931921	-0.606442	-0.51325	1.38626	LPS down p ≥ -log10 1.3	10				#N/A	#N/A									B4DUJ0	PSMF1	#N/A	#N/A	ANVS(0.033)S(0.967)PHREFPPATAR	1.47348	2.45095	0.977467	2.75628	LPS up p ≥ -log10 1.3	44		A0A140VK53	SRRM2;KIAA0324	C70A+LPS(84)	C70A(225)	EQNSALPTS(0.009)S(0.991)QDEELMEVVEK	-1.09582	-0.847838	0.247984	1.51129	LPS up p ≥ -log10 1.3	49		Q7Z417	NUFIP2
Q9BUH6	C9orf142	wt(166)	wt+LPS(162)	RLAAAEETAVS(1)PRK	1.58264	1.05969	-0.522945	1.57911	LPS down p ≥ -log10 1.3	11				#N/A	#N/A									Q9UHF7	TRPS1	P-mim+LPS(133)	#N/A	HPNYS(1)PPGSPIEK	-0.997055	-0.0274731	0.969582	1.34238	LPS up p ≥ -log10 1.3	45		H3BPE1	MACF1	C70A+LPS(84)	C70A(225)	AFLAELEQNS(1)PK	-0.927494	-0.759031	0.168463	1.53557	LPS up p ≥ -log10 1.3	50		B7Z7U0	SRRM1
Q5T200	ZC3H13	wt(166)	wt+LPS(162)	S(0.997)KLS(0.004)PS(0.997)PS(0.002)LRK	0.905158	0.37966	-0.525498	1.36091	LPS down p ≥ -log10 1.3	12				#N/A	#N/A									B4DUJ0	PSMF1	#N/A	P-mim(154)	ANVS(0.853)S(0.147)PHREFPPATAR	1.51723	2.48643	0.969194	1.73718	LPS up p ≥ -log10 1.3	46		Q8NDT2	RBM15B	C70A+LPS(84)	C70A(225)	TFLEGDWTS(0.999)PS(0.001)K	-0.801057	-0.67254	0.128516	1.45044	LPS up p ≥ -log10 1.3	51		F6RFD5	DSTN;HEL32
B4DZQ9	BAD	wt(166)	wt+LPS(162)	RMS(1)DEFVDSFKK	0.413512	-0.121669	-0.535181	1.74696	LPS down p ≥ -log10 1.3	13				#N/A	#N/A									Q4G0J3	LARP7	P-mim+LPS(133)	P-mim(154)	RSS(0.023)S(0.977)EDAESLAPR	0.0171738	0.977801	0.960627	1.68823	LPS up p ≥ -log10 1.3	47		Q8N122	RPTOR	C70A(182)	C70A(225)	GVHIHQAGGS(1)PPASSTSSSSLTNDVAK	2.07132	1.85268	-0.218637	1.54454	LPS down p ≥ -log10 1.3	1		V9HWE1	HEL113;VIM
Q71UH4	TOP2B	#N/A	#N/A	SEDDSAKFDS(1)NEEDSASVFSPSFGLK	0.926242	0.389138	-0.537104	1.51827	LPS down p ≥ -log10 1.3	14				#N/A	#N/A									G3V497	EML1	#N/A	P-mim(154)	KPTGSLPS(0.999)PS(0.001)GVRK	-0.424382	0.513091	0.937473	1.6788	LPS up p ≥ -log10 1.3	48		Q5UIP0	RIF1	C70A(182)	C70A(225)	ATS(0.001)EEDVS(0.998)IKS(0.001)PICEK	-0.837961	-1.08639	-0.248425	1.44338	LPS down p ≥ -log10 1.3	2		Q8NAN9	DPYSL2
Q9Y2W1	THRAP3	wt(166)	wt+LPS(162)	GSFS(1)DTGLGDGK	0.557621	0.0185862	-0.539035	1.80341	LPS down p ≥ -log10 1.3	15				#N/A	#N/A									E7EPN9	PRRC2C	P-mim+LPS(133)	P-mim(154)	LPDLS(1)PVENK	-0.375533	0.524068	0.899601	1.74301	LPS up p ≥ -log10 1.3	49		B3KM43	ASMTL	C70A(182)	C70A(225)	HDSIPAADTFEDLS(1)DVEGGGSEPTQR	-0.356711	-0.644443	-0.287731	1.34188	LPS down p ≥ -log10 1.3	3		Q6PKG0	LARP1
Q4VB24	HIST1H1E	wt(166)	#N/A	S(0.25)ET(0.75)APAAPAAPAPAEKT(1)PVKK	2.25761	1.70762	-0.549998	1.77404	LPS down p ≥ -log10 1.3	16				#N/A	#N/A									B7ZLW1	CAMSAP1	#N/A	P-mim(154)	APVHFVEPLS(0.998)PT(0.002)GVAGHRK	-0.635894	0.252119	0.888012	1.76355	LPS up p ≥ -log10 1.3	50		E7EVA0	MAP4;DKFZp547H1810	C70A(182)	#N/A	VGS(1)LDNVGHLPAGGAVK	1.27994	0.962598	-0.317347	1.35487	LPS down p ≥ -log10 1.3	4		Q5UIP0	RIF1
Q9Y6G0	RBMX2	wt(166)	wt+LPS(162)	ADREVQAEQPSSSS(1)PR	2.52496	1.97331	-0.551649	1.43605	LPS down p ≥ -log10 1.3	17				#N/A	#N/A									A9CQZ8	TJP1;DKFZp686A1195;DKFZp686M05161	#N/A	#N/A	AIPVS(0.986)PS(0.014)AVEEDEDEDGHTVVATAR	0.407056	1.2616	0.85454	1.88866	LPS up p ≥ -log10 1.3	51		Q3LIE1	Nbla04300;STXBP5	C70A(182)	C70A(225)	KLS(1)LPTDLKPDLDVK	0.0863231	-0.235515	-0.321838	2.03613	LPS down p ≥ -log10 1.3	5		A0A024RCC9	NAP1L4
A8MV53	PPAN;PPAN-P2RY11	wt(166)	wt+LPS(162)	VGGS(1)DEEASGIPSR	2.86401	2.31031	-0.553699	3.06702	LPS down p ≥ -log10 1.3	18				#N/A	#N/A									F5H8D7	XRCC1	P-mim+LPS(133)	#N/A	KTPSKPPAQLS(0.991)PS(0.009)VPK	-0.200763	0.631059	0.831822	1.53801	LPS up p ≥ -log10 1.3	52		Q6IEH8	NIPBL	C70A(182)	C70A(225)	NAASFPLRS(1)PQPVCSPAGSEGTPK	-0.197938	-0.559635	-0.361697	1.32318	LPS down p ≥ -log10 1.3	6		E7EPN9	PRRC2C
H7C446	PPAN	wt(166)	wt+LPS(162)	VGGS(1)DEEASGIPSR	2.86401	2.31031	-0.553699	3.06702	LPS down p ≥ -log10 1.3	19				#N/A	#N/A									O95785	WIZ	#N/A	P-mim(154)	KTPLALAGS(1)PTPK	0.528873	1.34949	0.820613	2.02364	LPS up p ≥ -log10 1.3	53		D3DVA5	ARHGEF2	C70A(182)	C70A(225)	RRS(1)LPAGDALYLSFNPPQPSR	0.517445	0.134892	-0.382553	1.68652	LPS down p ≥ -log10 1.3	7		Q5T200	ZC3H13
B4DZQ5		wt(166)	#N/A	EVIDAS(1)DKEGMS(1)PAKR	2.16756	1.61362	-0.553944	1.45212	LPS down p ≥ -log10 1.3	20				#N/A	#N/A									Q53HL1	MYL12A;MYL12B;MYL9	P-mim+LPS(133)	P-mim(154)	RPQRAT(1)S(1)NVFAMFDQSQIQEFK	-0.707067	0.107831	0.814898	2.25758	LPS up p ≥ -log10 1.3	54		D3DVA5	ARHGEF2	C70A(182)	C70A(225)	S(0.102)VS(0.882)T(0.016)T(0.001)NIAGHFNDESPLGLRR	0.618702	0.235508	-0.383194	1.41283	LPS down p ≥ -log10 1.3	8		Q5T200	ZC3H13
A0A024RA66	CDC2L5;CDK13	wt(166)	wt+LPS(162)	ILELT(1)PEPDRPR	0.0883648	-0.467912	-0.556277	3.71255	LPS down p ≥ -log10 1.3	21				#N/A	#N/A									Q53HL1	MYL12A;MYL12B;MYL9	P-mim+LPS(133)	P-mim(154)	RPQRAT(1)S(1)NVFAMFDQSQIQEFK	-0.707067	0.107831	0.814898	2.25758	LPS up p ≥ -log10 1.3	55		P42677	RPS27	C70A(182)	C70A(225)	DLLHPS(1)PEEEK	0.431074	0.0345806	-0.396493	1.53891	LPS down p ≥ -log10 1.3	9		A0A024RCC9	NAP1L4
A0A024R4Q5	TFPT	wt(166)	wt+LPS(162)	RTPAPPEPGS(1)PAPGEGPSGRK	0.567682	0.00722552	-0.560457	1.47953	LPS down p ≥ -log10 1.3	22				#N/A	#N/A									A0A0C4DGU2	MMACHC	P-mim+LPS(133)	P-mim(154)	SWLSPRVS(1)PPASPGP	-1.39297	-0.584895	0.808079	1.63529	LPS up p ≥ -log10 1.3	56		Q7Z6E9	RBBP6	C70A(182)	C70A(225)	FLPLNIRNS(1)PFTR	-0.584204	-0.98348	-0.399276	2.15703	LPS down p ≥ -log10 1.3	10		Q9BVS4	RIOK2
D6W5G0	AAK1	wt(166)	wt+LPS(162)	VQT(0.001)T(0.999)PPPAVQGQK	-0.637718	-1.20273	-0.565013	1.37004	LPS down p ≥ -log10 1.3	23				#N/A	#N/A									B7Z8Z8	MCM3AP	P-mim+LPS(133)	P-mim(154)	KPGDGEVS(0.998)PS(0.001)T(0.001)EDAPFQHSPLGK	0.334393	1.12136	0.786965	1.93712	LPS up p ≥ -log10 1.3	57		B4DLG2	ZC3H11A	C70A(182)	#N/A	TVLPTVPES(1)PEEEVK	0.224553	-0.176832	-0.401384	2.17254	LPS down p ≥ -log10 1.3	11		B4DLM0	DKFZp781C0423;RBM39
B4DXU3	TOMM34	wt(166)	#N/A	NRVPS(1)AGDVEK	0.345255	-0.220118	-0.565374	1.87172	LPS down p ≥ -log10 1.3	24				#N/A	#N/A									Q01167	FOXK2	P-mim+LPS(133)	P-mim(154)	FAQSAPGS(1)PLSSQPVLITVQR	-1.41367	-0.627104	0.786562	1.31167	LPS up p ≥ -log10 1.3	58		Q8IWA0	WDR75	C70A(182)	C70A(225)	VQDT(0.004)S(0.994)NT(0.002)GLGEDIIHQLSK	0.846859	0.421521	-0.425338	1.7335	LPS down p ≥ -log10 1.3	12		A0A0X1KG71	NELFB
E7ERS3	ZC3H18;FLJ00419	wt(166)	wt+LPS(162)	KLGVS(1)VS(1)PSR	0.832301	0.258714	-0.573587	1.56715	LPS down p ≥ -log10 1.3	25				#N/A	#N/A									A0A087X2D8	SPAG9	#N/A	P-mim(154)	ERPISLGIFPLPAGDGLLT(1)PDAQK	0.329096	1.08092	0.75182	1.34458	LPS up p ≥ -log10 1.3	59		Q3B726	TWISTNB	C70A(182)	C70A(225)	RKHS(1)EEAEFTPPLK	-0.575317	-1.00312	-0.427807	2.11533	LPS down p ≥ -log10 1.3	13		Q8N344	MIER2
Q541A5	ufd1;UFD1L	wt(166)	#N/A	GVEPSPS(1)PIKPGDIK	0.8155	0.231128	-0.584371	2.34306	LPS down p ≥ -log10 1.3	26				#N/A	#N/A									G3V1D0	EML3	P-mim+LPS(133)	P-mim(154)	AIS(1)SANLLVR	-1.42503	-0.673864	0.751164	1.64628	LPS up p ≥ -log10 1.3	60		Q71UH4	TOP2B	#N/A	C70A(225)	SEDDSAKFDS(1)NEEDSASVFSPSFGLK	0.438902	-0.0208378	-0.459739	1.50558	LPS down p ≥ -log10 1.3	14		A0A1U9X609	ABCF1
A0A024RAM4	MAP1B;DKFZp686F1345	#N/A	wt+LPS(162)	VQSLEGEKLS(1)PK	1.10609	0.505441	-0.60065	1.47958	LPS down p ≥ -log10 1.3	27				#N/A	#N/A									E9PGT3	RPS6KA1	P-mim+LPS(133)	P-mim(154)	AYS(1)FCGTVEYMAPEVVNR	-1.55118	-0.80509	0.746086	2.0002	LPS up p ≥ -log10 1.3	61		K7EJ04	ARID3A	C70A(182)	C70A(225)	RQS(0.996)FGGS(0.004)LFAYSPGGAHGMLSSPK	-0.193136	-0.653543	-0.460408	1.49467	LPS down p ≥ -log10 1.3	15		Q9UHR4	BAIAP2L1
B7ZKY4	KIF7	wt(166)	wt+LPS(162)	RS(0.005)S(0.995)LCGEEQGSPEELRQR	-0.0929537	-0.698326	-0.605373	1.57694	LPS down p ≥ -log10 1.3	28				#N/A	#N/A									B4DLG2	ZC3H11A	P-mim+LPS(133)	#N/A	TVLPTVPES(1)PEEEVK	-0.131614	0.588298	0.719913	1.65997	LPS up p ≥ -log10 1.3	62		H3BTX0	PAGR1	C70A(182)	C70A(225)	DLFSLDSEDPSPAS(1)PPLR	-0.0975476	-0.561162	-0.463614	1.32791	LPS down p ≥ -log10 1.3	16		B4DDK7	SNIP1
Q7Z6E9	RBBP6	wt(166)	wt+LPS(162)	WDKDDFES(1)EEEDVK	0.0257092	-0.584821	-0.610531	1.64121	LPS down p ≥ -log10 1.3	29				#N/A	#N/A									F8W7U3	FAM21C;FAM21D;FAM21A;DKFZp434O171;FAM21B	P-mim+LPS(133)	P-mim(154)	GPIAQWADGAIS(1)PNGHRPQLR	0.37581	1.08926	0.713454	1.37559	LPS up p ≥ -log10 1.3	63		D6REL5	FAM175A	C70A(182)	C70A(225)	GFGEYSRS(1)PTF	-0.700462	-1.17269	-0.472223	1.30054	LPS down p ≥ -log10 1.3	17		Q8N1G0	ZNF687
A0A024RA66	CDC2L5;CDK13	wt(166)	#N/A	IKIEHAPS(0.997)PS(0.001)S(0.001)GGT(0.001)LK	-0.0362425	-0.648191	-0.611949	1.36276	LPS down p ≥ -log10 1.3	30				#N/A	#N/A									Q53GX4	FKBP5	#N/A	P-mim(154)	NNEES(1)PTATVAEQGEDITSKK	-1.03186	-0.341592	0.690268	1.32748	LPS up p ≥ -log10 1.3	64		B4DKS0	SLC16A1	C70A(182)	C70A(225)	ES(0.994)KEEET(0.005)S(0.001)IDVAGKPNEVTK	2.77414	2.29863	-0.47551	1.86682	LPS down p ≥ -log10 1.3	18		P49792	RANBP2
P49792	RANBP2	wt(166)	wt+LPS(162)	SGSSFVHQAS(1)FK	-0.136723	-0.752634	-0.615911	1.54996	LPS down p ≥ -log10 1.3	31				#N/A	#N/A									Q8WWM7	ATXN2L	P-mim+LPS(133)	#N/A	GQSTGKGPPQS(1)PVFEGVYNNSR	-0.14851	0.534525	0.683035	2.35168	LPS up p ≥ -log10 1.3	65		F8VY35	NAP1L1	C70A(182)	#N/A	LDGLVET(1)PTGYIESLPR	-0.78687	-1.26532	-0.478446	1.3119	LPS down p ≥ -log10 1.3	19		A8K2P6	ZNF503
Q5RGS4	PLEKHA1	wt(166)	wt+LPS(162)	RLS(1)NPCIQR	-0.0145065	-0.635035	-0.620529	1.76097	LPS down p ≥ -log10 1.3	32				#N/A	#N/A									Q7Z417	NUFIP2	P-mim+LPS(133)	P-mim(154)	DYEIESQNPLAS(1)PTNTLLGSAK	0.231032	0.899993	0.668961	1.54393	LPS up p ≥ -log10 1.3	66		J3KNZ9	FBRS;FBS1	C70A(182)	C70A(225)	TPPGALLGAPPPLVPAPRPS(0.154)S(0.846)PPRGPGPAR	0.198069	-0.281668	-0.479738	1.56321	LPS down p ≥ -log10 1.3	20		A0A024R5U7	SLTM
Q9ULM3	YEATS2	wt(166)	#N/A	ISTASQVSQGTGS(1)PVPK	0.154316	-0.470994	-0.625309	1.56936	LPS down p ≥ -log10 1.3	33				#N/A	#N/A									Q96JM3	CHAMP1	P-mim+LPS(133)	P-mim(154)	KPGPPLS(1)PEIR	-0.934437	-0.303235	0.631202	1.44112	LPS up p ≥ -log10 1.3	67		E9PJ38	EBAG9;RCAS1	C70A(182)	C70A(225)	KLS(1)GDQITLPTTVDYSSVPK	1.67623	1.19124	-0.484989	1.40631	LPS down p ≥ -log10 1.3	21		A0A024R5S5	EIF3S1;EIF3J
A1A5C4	RRBP1	wt(166)	wt+LPS(162)	NTDVAQS(1)PEAPKQEAPAK	0.231544	-0.394283	-0.625827	1.84803	LPS down p ≥ -log10 1.3	34				#N/A	#N/A									Q8IX90	SKA3	P-mim+LPS(133)	P-mim(154)	S(0.001)PRS(0.999)PQLSDFGLER	-0.837887	-0.21365	0.624237	1.3821	LPS up p ≥ -log10 1.3	68		Q9UHF7	TRPS1	C70A(182)	#N/A	HPNYS(1)PPGSPIEK	-0.0486253	-0.542073	-0.493448	1.36475	LPS down p ≥ -log10 1.3	22		Q53GP9	DUSP6;DUSP9;DUSP7
Q59FD2	CTAGE5;MIA2;CTAGE1	wt(166)	wt+LPS(162)	FCS(0.001)NS(0.006)GRLS(0.993)GPAELR	0.383476	-0.245247	-0.628724	1.47166	LPS down p ≥ -log10 1.3	35				#N/A	#N/A									A0A0J9YX88	PHRF1;KIAA1542	P-mim+LPS(133)	P-mim(154)	GRECS(0.997)PT(0.001)S(0.001)SLER	0.37373	0.968084	0.594354	1.42871	LPS up p ≥ -log10 1.3	69		D6REC6	CDK7	C70A(182)	C70A(225)	S(0.612)FGS(0.384)PNRAYT(0.004)HQVVT(1)R	1.72839	1.2291	-0.49929	2.28247	LPS down p ≥ -log10 1.3	23		Q8N995	HMGCS1
Q09666	AHNAK	#N/A	wt+LPS(162)	GGVTGS(1)PEASISGSK	-0.0895822	-0.72167	-0.632087	1.37682	LPS down p ≥ -log10 1.3	36				#N/A	#N/A									P07197	NEFM;NEF3	P-mim+LPS(133)	P-mim(154)	SPVPKS(1)PVEEK	3.24411	3.82085	0.576746	1.50295	LPS up p ≥ -log10 1.3	70		Q9H467	CUEDC2	C70A(182)	C70A(225)	ENLQPQSSGVQGQVPIS(1)PEPLQRPEMLK	0.123019	-0.387675	-0.510694	4.78341	LPS down p ≥ -log10 1.3	24		Q8TAE6	PPP1R14C
B4DKT9	CTNNA1;CTNNA2	wt(166)	wt+LPS(162)	SRT(0.003)S(0.997)VQTEDDQLIAGQSAR	-0.122376	-0.755733	-0.633357	1.42427	LPS down p ≥ -log10 1.3	37				#N/A	#N/A									M0QZ28	DTNA	#N/A	#N/A	TQFEDLVPS(0.995)PT(0.005)SEK	-0.812744	-0.29019	0.522554	1.36791	LPS up p ≥ -log10 1.3	71		B3KW05	GPRASP2	C70A(182)	C70A(225)	LRTNREDCFES(0.028)ES(0.972)EDEFYK	-0.541966	-1.05436	-0.512394	1.51897	LPS down p ≥ -log10 1.3	25		Q9UHR4	BAIAP2L1
Q9UIG0	BAZ1B	wt(166)	wt+LPS(162)	LAEDEGDS(1)EPEAVGQSR	1.50602	0.857665	-0.648355	1.45245	LPS down p ≥ -log10 1.3	38				#N/A	#N/A									O75151	PHF2	P-mim+LPS(133)	P-mim(154)	SRESAS(0.001)PT(0.999)IPNLDLLEAHTK	1.31683	1.83076	0.513938	1.66092	LPS up p ≥ -log10 1.3	72		Q14684	RRP1B	C70A(182)	C70A(225)	TPT(0.005)S(0.975)S(0.019)PAS(0.913)S(0.087)PLVAK	1.59017	1.07666	-0.513519	1.35861	LPS down p ≥ -log10 1.3	26		C9JME2	FARP1
A0A024R5U7	SLTM	wt(166)	#N/A	AGAGMITQHSSNAS(1)PINR	0.92101	0.270218	-0.650792	1.38309	LPS down p ≥ -log10 1.3	39				#N/A	#N/A									Q9BQG0	MYBBP1A	P-mim+LPS(133)	P-mim(154)	DPAQPMS(1)PGEATQSGARPADR	2.44621	2.91533	0.469124	2.56782	LPS up p ≥ -log10 1.3	73		Q8WWM7	ATXN2L	C70A(182)	#N/A	GQSTGKGPPQS(1)PVFEGVYNNSR	-0.0276756	-0.556305	-0.528629	1.69199	LPS down p ≥ -log10 1.3	27		Q86YD1	PTOV1
P47974	ZFP36L2	wt(166)	wt+LPS(162)	RHS(0.999)AS(0.001)NLHALAHPAPSPGSCSPK	0.219247	-0.434691	-0.653938	1.3905	LPS down p ≥ -log10 1.3	40				#N/A	#N/A									A0A0S2Z4G7	NPM1	P-mim+LPS(133)	P-mim(154)	TVSLGAGAKDELHIVEAEAMNYEGS(1)PIK	0.158954	0.610899	0.451945	1.76326	LPS up p ≥ -log10 1.3	74		A0A024R546	ZDHHC5	C70A(182)	C70A(225)	LS(0.002)RGDS(0.997)LKEPT(0.001)SIAESSR	1.70691	1.15559	-0.551326	1.49781	LPS down p ≥ -log10 1.3	28		D6RI08	OCIAD1
Q5VZL5	ZMYM4	wt(166)	wt+LPS(162)	RVTQHES(1)DNENEIQIQNK	1.01318	0.35756	-0.655621	1.42544	LPS down p ≥ -log10 1.3	41				#N/A	#N/A									A0A0G2JPP5	SCRIB	P-mim+LPS(133)	P-mim(154)	VQS(1)PEPPAPER	1.25803	1.65467	0.396638	1.46096	LPS up p ≥ -log10 1.3	75		Q9Y4H2	IRS2	C70A(182)	C70A(225)	SSEGGVGVGPGGGDEPPT(0.009)S(0.991)PR	0.849641	0.273495	-0.576146	1.49354	LPS down p ≥ -log10 1.3	29		B4DY33	KIAA0415;FOXK1
A0A0U1RQZ9	SMARCA2	wt(166)	wt+LPS(162)	GRPPAEKLS(1)PNPPK	0.76556	0.103573	-0.661987	2.12429	LPS down p ≥ -log10 1.3	42				#N/A	#N/A									O95425	SVIL	P-mim(51)	P-mim(154)	DSSFTEVPRS(1)PK	1.90803	1.63785	-0.270188	1.4181	LPS down p ≥ -log10 1.3	1		Q9BYW2	SETD2	C70A(182)	C70A(225)	RCCS(1)PPNELGFRR	0.225928	-0.351182	-0.57711	2.1947	LPS down p ≥ -log10 1.3	30		B2R4C9	DAP
A0A140VK53	SRRM2	wt(166)	wt+LPS(162)	SRS(1)VS(1)PCSNVESR	0.798248	0.133399	-0.664848	1.61659	LPS down p ≥ -log10 1.3	43				#N/A	#N/A									P29692	EEF1D	P-mim(51)	P-mim(154)	ATAPQTQHVS(1)PMRQVEPPAK	2.90399	2.58986	-0.314136	1.66482	LPS down p ≥ -log10 1.3	2		Q9UKE5	TNIK	C70A(182)	C70A(225)	T(0.008)T(0.01)S(0.981)IS(1)PALARK	0.336509	-0.241481	-0.577989	1.61532	LPS down p ≥ -log10 1.3	31		Q03164	KMT2A
E3W974	DNPEP	wt(166)	wt+LPS(162)	S(0.001)GHS(0.996)PT(0.004)RGAMQVAMNGK	-0.0860465	-0.753327	-0.66728	1.53083	LPS down p ≥ -log10 1.3	44				#N/A	#N/A									B3KS10	MPHOSPH8	P-mim(51)	P-mim(154)	GY(0.007)T(0.01)S(0.983)DDDTWEPEIHLEDCK	-0.27499	-0.636579	-0.361588	1.60041	LPS down p ≥ -log10 1.3	3		Q5T1Z4	PUM1	C70A(182)	C70A(225)	RDS(1)LTGSSDLYK	1.18635	0.605551	-0.580803	1.66162	LPS down p ≥ -log10 1.3	32		Q3B726	TWISTNB
A0A140VK53	SRRM2	wt(166)	wt+LPS(162)	THTTALAGRS(1)PS(0.999)PAS(0.001)GR	3.98326	3.30106	-0.682203	2.06372	LPS down p ≥ -log10 1.3	45				#N/A	#N/A									F8VPD4	CAD	P-mim(51)	P-mim(154)	IHRAS(1)DPGLPAEEPKEK	4.60949	4.23539	-0.374108	1.31387	LPS down p ≥ -log10 1.3	4		Q6P1N0	CC2D1A	C70A(182)	C70A(225)	AS(0.228)ET(0.772)PPPVAQPKPEAPHPGLETTLQER	-0.200051	-0.787672	-0.587621	1.36456	LPS down p ≥ -log10 1.3	33		X5D7D8	DLX2
A0A024R663	KTN1	wt(166)	wt+LPS(162)	EIQNGNLHES(1)DSESVPR	0.712693	0.0264109	-0.686282	1.3189	LPS down p ≥ -log10 1.3	46				#N/A	#N/A									A0A087WVZ6	ZMYND8;DKFZp564P1772	P-mim(51)	#N/A	TPPSTTVGS(0.001)HS(0.995)PPET(0.003)PVLT(0.001)R	2.08591	1.67082	-0.415091	1.47237	LPS down p ≥ -log10 1.3	5		Q96JM3	CHAMP1	C70A(182)	C70A(225)	NQLNKETDPVKS(1)PPLPEHQK	1.18753	0.598747	-0.588785	1.78155	LPS down p ≥ -log10 1.3	34		B3KN28	PGM3
Q9Y2V2	CARHSP1	wt(166)	#N/A	ERS(1)PS(1)PLRGNVVPS(1)PLPTR	0.869492	0.182213	-0.68728	1.46487	LPS down p ≥ -log10 1.3	47				#N/A	#N/A									Q14684	RRP1B	P-mim(51)	P-mim(154)	VGDGDLS(1)AEEIPENEVSLRR	0.867313	0.424309	-0.443004	1.37557	LPS down p ≥ -log10 1.3	6		B3KS10	MPHOSPH8	C70A(182)	C70A(225)	GAEAFGDS(1)EEDGEDVFEVEK	0.143943	-0.448153	-0.592096	3.34425	LPS down p ≥ -log10 1.3	35		Q71UH4	TOP2B
S4R3H4	ACIN1;DKFZp667N107	wt(166)	wt+LPS(162)	SLS(1)PGVSR	-0.516591	-1.20993	-0.693336	2.60935	LPS down p ≥ -log10 1.3	48				#N/A	#N/A									Q16514	TAF12	P-mim(51)	P-mim(154)	IPGTPGAGGRLS(1)PENNQVLTK	0.906037	0.45879	-0.447247	1.74522	LPS down p ≥ -log10 1.3	7		A0A140VK53	SRRM2;KIAA0324	C70A(182)	C70A(225)	AQT(1)PPGPSLSGS(0.062)KS(0.938)PCPQEK	3.63138	3.01799	-0.61339	2.28659	LPS down p ≥ -log10 1.3	36		Q9NVD7	PARVA
A0A0G2JNZ2	SCRIB	wt(166)	#N/A	LAEAPS(0.001)PAPT(0.01)PS(0.031)PT(0.034)PVEDLGPQT(0.237)S(0.237)T(0.237)S(0.237)PGRLS(0.977)PDFAEELR	2.41232	1.7175	-0.694817	1.6879	LPS down p ≥ -log10 1.3	49				#N/A	#N/A									H3BT22	ORC6;ORC6L	P-mim(51)	P-mim(154)	IGQQVDREPGDVAT(1)PPRK	1.87905	1.37341	-0.505642	1.54804	LPS down p ≥ -log10 1.3	8		A0A087WVZ6	ZMYND8;DKFZp564P1772	C70A(182)	#N/A	TPPSTTVGS(0.001)HS(0.995)PPET(0.003)PVLT(0.001)R	2.51385	1.89316	-0.620691	1.51509	LPS down p ≥ -log10 1.3	37		P54105	CLNS1A
Q9BYW2	SETD2	wt(166)	#N/A	AGS(1)PAPSNRLNDS(0.999)PT(0.001)LK	0.687369	-0.0107911	-0.69816	1.57787	LPS down p ≥ -log10 1.3	50				#N/A	#N/A									Q0D2M5	SNW1	P-mim(51)	P-mim(154)	GPPS(1)PPAPVMHSPS(1)RK	1.79172	1.24057	-0.551147	1.48088	LPS down p ≥ -log10 1.3	9		A0A024R9R5	ZFP106;ZNF106;DKFZp451A177	C70A(182)	C70A(225)	EPHS(1)PADQPEQQAESTLTSAETR	0.137993	-0.485468	-0.623461	1.49146	LPS down p ≥ -log10 1.3	38		Q9NTI5	PDS5B
Q9BYW2	SETD2	wt(166)	#N/A	AGS(1)PAPSNRLNDS(0.996)PT(0.004)LK	0.687369	-0.0107911	-0.69816	1.57787	LPS down p ≥ -log10 1.3	51				#N/A	#N/A									A0A087WYY3	ATP13A3	P-mim(51)	P-mim(154)	LVHDS(1)LEDLQMTR	-0.613318	-1.16724	-0.553918	1.31108	LPS down p ≥ -log10 1.3	10		U3KPW8	HOMEZ	C70A(182)	#N/A	S(0.944)LNERAET(0.056)PPLPIPPPPPDIQPLER	-0.575005	-1.20435	-0.629346	2.30527	LPS down p ≥ -log10 1.3	39		Q8IWS0	PHF6
Q9Y5B6	PAXBP1;C21orf66	#N/A	wt+LPS(162)	GRLVREDENDAS(1)DDEDDDEK	0.172501	-0.526695	-0.699197	1.57871	LPS down p ≥ -log10 1.3	52				#N/A	#N/A									F8WDB4	LRWD1	P-mim(51)	P-mim(154)	RPDDVPLSLS(1)PSK	2.07472	1.51214	-0.562584	1.49461	LPS down p ≥ -log10 1.3	11		P24928	POLR2A	C70A(182)	#N/A	YTPTSPSYSPS(0.069)S(0.93)PEYT(0.001)PTSPK	-0.533584	-1.18565	-0.652067	1.38139	LPS down p ≥ -log10 1.3	40		H0YH87	ATXN2
Q9BYW2	SETD2	wt(166)	wt+LPS(162)	RRS(1)S(0.001)LS(0.699)PPS(0.125)S(0.175)AYER	-0.123681	-0.830239	-0.706558	1.49582	LPS down p ≥ -log10 1.3	53				#N/A	#N/A									A8K1C7	LRRC8A	P-mim(51)	P-mim(154)	S(1)RIEQGIVDR	0.350793	-0.21311	-0.563903	1.34295	LPS down p ≥ -log10 1.3	12		Q96T58	SPEN	#N/A	C70A(225)	LDRLNTVAS(1)PK	0.199836	-0.453535	-0.653371	1.36346	LPS down p ≥ -log10 1.3	41		B2RTX8	WAPAL
Q5T6U8	HMGA1	#N/A	wt+LPS(162)	KQPPKEPSEVPT(1)PK	1.53147	0.818025	-0.71345	1.35957	LPS down p ≥ -log10 1.3	54				#N/A	#N/A									F8W038	C17orf49;RNASEK-C17orf49;BAP18	P-mim(51)	P-mim(154)	VAS(0.001)GVLS(0.999)PPPAAPPPSSSSVPEAGGPPIKK	0.219017	-0.372105	-0.591122	2.16535	LPS down p ≥ -log10 1.3	13		B2R5V9	HDLBP	C70A(182)	C70A(225)	DCDPGS(1)PRRCDIIIISGR	-0.241727	-0.895109	-0.653382	2.23943	LPS down p ≥ -log10 1.3	42		A0A0S2Z5K3	Nbla00360;DCP1A
B4DYY5	UBAP2L	wt(166)	wt+LPS(162)	NPSDSAVHS(1)PFTK	1.18676	0.470235	-0.716529	1.71706	LPS down p ≥ -log10 1.3	55				#N/A	#N/A									Q53FF5	NSFL1C	P-mim(51)	P-mim(154)	KKS(1)PNELVDDLFK	0.210131	-0.424182	-0.634313	1.31471	LPS down p ≥ -log10 1.3	14		Q96JC9	EAF1	C70A(182)	C70A(225)	DNPS(1)PEPQLDDIKR	0.681602	0.0252032	-0.656398	1.32965	LPS down p ≥ -log10 1.3	43		P55265	ADAR
A0A0A0MRA8	EPB41L3	wt(166)	#N/A	SLDGAS(1)VNENHEIYMK	1.32728	0.610642	-0.716638	2.13556	LPS down p ≥ -log10 1.3	56				#N/A	#N/A									Q69YN4	KIAA1429	P-mim(51)	P-mim(154)	VIS(0.002)HDRDS(0.998)PPPPPPPPPPPQPQPSLK	0.768931	0.087901	-0.68103	2.10986	LPS down p ≥ -log10 1.3	15		A0A024RA49	ANLN	C70A(182)	C70A(225)	SCEGQNPELLPKT(1)PIS(1)PLK	-0.404605	-1.06305	-0.658449	1.60135	LPS down p ≥ -log10 1.3	44		Q8N4P8	GTPBP4
Q8N344	MIER2	wt(166)	#N/A	AEASSLGRQS(1)PR	0.658509	-0.0613534	-0.719862	1.90607	LPS down p ≥ -log10 1.3	57				#N/A	#N/A									A0A024R3R1	ARID4B	P-mim(51)	P-mim(154)	VHADLVISKPVS(0.003)KS(0.997)PER	1.01591	0.32224	-0.693665	2.18094	LPS down p ≥ -log10 1.3	16		A0A024R228	HNRPK;HNRNPK	C70A(182)	C70A(225)	RDYDDMS(1)PR	0.282541	-0.380079	-0.66262	2.33836	LPS down p ≥ -log10 1.3	45		B3KT40	TJAP1
Q14DU5	ROCK2	wt(166)	#N/A	KPPAPDPFARS(0.971)S(0.029)PR	1.7438	1.02238	-0.721421	2.45872	LPS down p ≥ -log10 1.3	58				#N/A	#N/A									Q14DU5	ROCK2	#N/A	P-mim(154)	KPPAPDPFARS(0.971)S(0.029)PR	2.20321	1.50337	-0.699843	1.63231	LPS down p ≥ -log10 1.3	17		P49792	RANBP2	C70A(182)	C70A(225)	NHET(0.001)DGGS(0.999)AHGDDDDDGPHFEPVVPLPDKIEVK	0.115804	-0.547684	-0.663488	1.97637	LPS down p ≥ -log10 1.3	46		A0A024R106	ZCRB1
Q9HCM7	FBRSL1	wt(166)	#N/A	DYS(0.989)PS(0.011)RNPPEVEAR	-0.709642	-1.43185	-0.722206	1.36753	LPS down p ≥ -log10 1.3	59				#N/A	#N/A									B7Z5R7	CLASP1	P-mim(51)	P-mim(154)	VLST(0.008)S(0.987)T(0.005)DLEAAVADALK	-0.99012	-1.73272	-0.742601	1.8464	LPS down p ≥ -log10 1.3	18		A0JLN3	RRP15	C70A(182)	C70A(225)	AAAAPDSRVS(1)EEENLK	-0.0826402	-0.760183	-0.677543	1.88562	LPS down p ≥ -log10 1.3	47		A0A024R9G7	ATAD2
G1UI22	MLLT4	wt(166)	wt+LPS(162)	TIS(1)NPEVVMK	0.854563	0.126504	-0.728059	1.58549	LPS down p ≥ -log10 1.3	60				#N/A	#N/A									Q8TC07	TBC1D15;DKFZp761D0223	P-mim(51)	P-mim(154)	NDS(1)PTQIPVSSDVCR	-0.109896	-0.855204	-0.745308	1.53665	LPS down p ≥ -log10 1.3	19		A0A024RAM4	MAP1B;DKFZp686F1345	#N/A	C70A(225)	VQSLEGEKLS(1)PK	0.905025	0.219724	-0.685301	1.31961	LPS down p ≥ -log10 1.3	48		Q4LE70	APC variant protein;APC
Q7Z2Z1	TICRR	wt(166)	wt+LPS(162)	LHPDGS(1)PDVAGEK	0.0969077	-0.635063	-0.731971	2.93102	LPS down p ≥ -log10 1.3	61				#N/A	#N/A									E9PJF6	AMPD2	P-mim(51)	P-mim(154)	HFPLDLRT(0.01)S(0.99)MDGK	0.117994	-0.668744	-0.786738	1.46059	LPS down p ≥ -log10 1.3	20		Q53GG0	LIMA1	C70A(182)	C70A(225)	SRPFTVAASFQSTSVKS(1)PK	-0.376769	-1.06516	-0.688395	1.45933	LPS down p ≥ -log10 1.3	49		A0A140VKC4	MECP2
A0A024QZQ1	SIRT1	#N/A	#N/A	ADEAALALQPGGS(0.97)PS(0.346)AAGADREAAS(0.342)S(0.342)PAGEPLRK	2.94629	2.21201	-0.734282	1.82927	LPS down p ≥ -log10 1.3	62				#N/A	#N/A									Q14DU5	ROCK2	#N/A	P-mim(154)	KPPAPDPFARS(0.048)S(0.952)PR	2.19692	1.37858	-0.818333	1.7507	LPS down p ≥ -log10 1.3	21		Q9Y385	UBE2J1	C70A(182)	C70A(225)	RLS(1)TSPDVIQGHQPR	2.54456	1.8524	-0.692163	1.97381	LPS down p ≥ -log10 1.3	50		B4DP61	SMN2;SMN1
Q8N1G0	ZNF687	wt(166)	#N/A	ATDIPASAS(1)PPPVAGVPFFK	-0.109985	-0.845282	-0.735297	1.45084	LPS down p ≥ -log10 1.3	63				#N/A	#N/A									Q8TDD1	DDX54	P-mim(51)	P-mim(154)	LGPGRPLPTFPTSECT(0.006)S(0.994)DVEPDTR	1.84756	0.999086	-0.848477	1.84228	LPS down p ≥ -log10 1.3	22		A0A024RCK7	ZNF192;ZKSCAN8	C70A(182)	C70A(225)	AEESRKPS(0.003)APS(0.997)PPDQTPEEDLVIVK	-0.25429	-0.947178	-0.692888	1.43274	LPS down p ≥ -log10 1.3	51		W0S1J7	Pe7Fe14;PJA2
Q6IB11	PGRMC1	wt(166)	wt+LPS(162)	EGEEPTVYS(1)DEEEPKDESAR	1.40237	0.666941	-0.735429	1.41608	LPS down p ≥ -log10 1.3	64				#N/A	#N/A									Q5JSH3	WDR44;DKFZp761M142	P-mim(51)	P-mim(154)	RKS(1)ELEFETLK	0.377647	-0.492217	-0.869865	1.4778	LPS down p ≥ -log10 1.3	23		P49736	MCM2	C70A(182)	C70A(225)	GNDPLTSS(1)PGR	1.11786	0.421801	-0.696061	1.38896	LPS down p ≥ -log10 1.3	52		A0A096LP25	AAK1
Q96T58	SPEN	#N/A	wt+LPS(162)	LDRLNTVAS(1)PK	0.25789	-0.481025	-0.738914	1.58098	LPS down p ≥ -log10 1.3	65				#N/A	#N/A									Q6ZRV2	FAM83H	P-mim(51)	P-mim(154)	RGS(0.999)PTTGFIEQK	1.29615	0.424122	-0.872027	1.31139	LPS down p ≥ -log10 1.3	24		H7C5M1	RBM34	C70A(182)	C70A(225)	RSVQEGENPDDGVRGS(1)PPEDYR	0.815729	0.118275	-0.697454	1.72459	LPS down p ≥ -log10 1.3	53		Q05BS8	SFRS2IP;SCAF11
A8K897	NUP93	wt(166)	wt+LPS(162)	TLTRT(0.001)S(0.999)QETADVK	1.05356	0.313197	-0.740363	1.44138	LPS down p ≥ -log10 1.3	66				#N/A	#N/A									E7EVA0	MAP4;DKFZp547H1810	P-mim(51)	#N/A	VGS(1)LDNVGHLPAGGAVK	1.73732	0.820965	-0.916358	2.37453	LPS down p ≥ -log10 1.3	25		A0A1U9XBE3	MDC1	C70A(182)	C70A(225)	ESEDSETQPFDTHLEAYGPCLS(1)PPR	0.206877	-0.493658	-0.700535	2.77225	LPS down p ≥ -log10 1.3	54		F8W930	IGF2BP2
A0A024QZH6	SR-A1;SCAF1	wt(166)	wt+LPS(162)	EAASSSSGTQPAPPAPAS(1)PWDSKK	-0.15147	-0.892803	-0.741333	1.42571	LPS down p ≥ -log10 1.3	67				#N/A	#N/A									H0YH87	ATXN2	P-mim(51)	P-mim(154)	RMSSEGPPRMS(1)PK	-0.119763	-1.07953	-0.959763	1.32381	LPS down p ≥ -log10 1.3	26		D0PNI1	YWHAZ	C70A(182)	C70A(225)	TAFDEAIAELDTLS(1)EESYK	-0.460382	-1.16307	-0.70269	2.02474	LPS down p ≥ -log10 1.3	55		Q09472	EP300
B9EGI2	MPRIP;M-RIP;KIAA0864	wt(166)	wt+LPS(162)	S(0.001)KS(0.999)NPDFLKK	-0.0427269	-0.785582	-0.742855	1.57654	LPS down p ≥ -log10 1.3	68				#N/A	#N/A									A0A024RAM4	MAP1B;DKFZp686F1345	P-mim(51)	#N/A	SLMS(1)S(1)PEDLTK	-0.114998	-1.09339	-0.978394	1.34677	LPS down p ≥ -log10 1.3	27		O95835	LATS1	C70A(182)	#N/A	T(1)FPASNYTVSSR	-0.993796	-1.70157	-0.707778	3.09037	LPS down p ≥ -log10 1.3	56		Q3B726	TWISTNB
E9PGM9	RBM6	wt(166)	#N/A	LQSFDS(1)PERK	1.95124	1.19675	-0.754493	1.81616	LPS down p ≥ -log10 1.3	69				#N/A	#N/A									A0A0G2JPP5	SCRIB	P-mim(51)	P-mim(154)	MVEPENAVTIT(0.001)PLRPEDDY(0.021)S(0.978)PRER	0.745026	-0.297286	-1.04231	3.18235	LPS down p ≥ -log10 1.3	28		Q9NWD6	RABL6	C70A(182)	#N/A	NDSDLFGLGLEEAGPKES(1)S(1)EEGKEGK	-0.572327	-1.28901	-0.716683	1.49559	LPS down p ≥ -log10 1.3	57		Q53HL1	MYL12A;MYL12B;MYL9
Q96GM8	TOE1	wt(166)	wt+LPS(162)	AADS(1)DDGAVSAPAASDGGVSK	0.598251	-0.158652	-0.756903	1.37142	LPS down p ≥ -log10 1.3	70				#N/A	#N/A									O43719	HTATSF1	P-mim(51)	P-mim(154)	ESEEGNPVRGSEEDS(1)PKK	0.208301	-1.03409	-1.24239	1.73454	LPS down p ≥ -log10 1.3	29		Q9H1E3	NUCKS1	C70A(182)	C70A(225)	TPSPKEEDEEPES(1)PPEKK	2.71505	1.98696	-0.728091	1.58397	LPS down p ≥ -log10 1.3	58		P46783	RPS10;RPS10P5
C9J2I0	AGFG1;HRB	wt(166)	#N/A	GTPSQS(1)PVVGR	1.68373	0.917449	-0.766281	1.50296	LPS down p ≥ -log10 1.3	71				#N/A	#N/A									A0A087WY82	F11R	P-mim(51)	P-mim(154)	VIYSQPS(1)ARS(1)EGEFK	1.46663	-0.208156	-1.67479	1.95145	LPS down p ≥ -log10 1.3	30		Q9Y4E8	USP15	C70A(182)	C70A(225)	S(1)PGASNFSTLPK	-0.652746	-1.38436	-0.731616	1.43112	LPS down p ≥ -log10 1.3	59		O75533	SF3B1
I3L2J8	CEP131;AZI1	wt(166)	#N/A	VPGMRQPAQELS(1)PTPGGTAHQALK	-0.268079	-1.03662	-0.768546	1.57545	LPS down p ≥ -log10 1.3	72				#N/A	#N/A											#N/A	#N/A									A0A024R0L5	GSK3A;DKFZp686D0638;GSK3B	C70A(182)	C70A(225)	QLVRGEPNVSY(1)ICSR	1.83535	1.09254	-0.742809	2.00323	LPS down p ≥ -log10 1.3	60		A0A1U9X7A9	BAT3;BAG6
O43719	HTATSF1	#N/A	#N/A	LFEES(1)DDKEDEDADGKEVEDADEK	1.45624	0.681151	-0.775085	1.90328	LPS down p ≥ -log10 1.3	73				#N/A	#N/A											#N/A	#N/A									Q71UH4	TOP2B	C70A(182)	C70A(225)	VKAS(0.999)PIT(0.001)NDGEDEFVPSDGLDKDEYT(0.003)FS(0.997)PGK	1.84365	1.09745	-0.746193	1.52418	LPS down p ≥ -log10 1.3	61		E3W994	CLASP2
H0Y2V6	CEP170	wt(166)	wt+LPS(162)	LGSLSARS(0.014)DS(0.986)EATISR	1.19245	0.414264	-0.778181	1.31167	LPS down p ≥ -log10 1.3	74				#N/A	#N/A											#N/A	#N/A									O43719	HTATSF1	#N/A	C70A(225)	LFEES(1)DDKEDEDADGKEVEDADEK	1.41053	0.658908	-0.751622	1.31863	LPS down p ≥ -log10 1.3	62		A0A024RA66	CDC2L5;CDK13
Q14DU5	ROCK2	wt(166)	#N/A	KPPAPDPFARS(0.048)S(0.952)PR	1.80084	1.02238	-0.778457	2.44668	LPS down p ≥ -log10 1.3	75				#N/A	#N/A											#N/A	#N/A									Q09666	AHNAK	#N/A	C70A(225)	GGVTGS(1)PEASISGSK	-0.414261	-1.16771	-0.753446	2.00316	LPS down p ≥ -log10 1.3	63		Q5UIP0	RIF1
A0A024RAM4	MAP1B;DKFZp686F1345	wt(166)	wt+LPS(162)	SKPLAAS(1)PKPAGLK	-0.0477343	-0.832399	-0.784665	1.37316	LPS down p ≥ -log10 1.3	76				#N/A	#N/A											#N/A	#N/A									Q5UIP0	RIF1	C70A(182)	C70A(225)	RDS(1)FDNCSLGESSK	2.40499	1.63029	-0.774696	1.59858	LPS down p ≥ -log10 1.3	64		E9PFK5	NOP14
Q12888	TP53BP1	wt(166)	#N/A	LITSEEERS(1)PAK	2.00097	1.19403	-0.80694	1.84365	LPS down p ≥ -log10 1.3	77				#N/A	#N/A											#N/A	#N/A									P52948	NUP98	#N/A	C70A(225)	YGLQDS(1)DEEEEEHPSK	2.24416	1.46871	-0.77545	1.40826	LPS down p ≥ -log10 1.3	65		Q5H909	MAGED2
C9JFE4	GPS1	wt(166)	wt+LPS(162)	SPPREGSQGELT(1)PANSQSR	0.430071	-0.38721	-0.81728	1.58708	LPS down p ≥ -log10 1.3	78				#N/A	#N/A											#N/A	#N/A									Q549C5	MST065;TOMM22	C70A(182)	#N/A	AAAVAAAGAGEPQS(1)PDELLPK	-0.724169	-1.50933	-0.785157	1.71929	LPS down p ≥ -log10 1.3	66		B5LY69	UMPS
B7Z7U0	SRRM1	wt(166)	wt+LPS(162)	SRVS(1)VS(0.766)PGRT(0.139)S(0.093)VT(0.002)K	3.38722	2.5677	-0.819524	3.3095	LPS down p ≥ -log10 1.3	79				#N/A	#N/A											#N/A	#N/A									A8K3M3	PTPN1	C70A(182)	C70A(225)	VVGGS(1)LRGAQAASPAK	0.374649	-0.443822	-0.818471	1.47479	LPS down p ≥ -log10 1.3	67		O75533	SF3B1
Q59FW1	MTA1	wt(166)	#N/A	VAPVINNGS(0.999)PT(0.001)ILGK	0.902405	0.0778231	-0.824582	1.68519	LPS down p ≥ -log10 1.3	80				#N/A	#N/A											#N/A	#N/A									B2R8P9	KLF3	C70A(182)	C70A(225)	RPLPVES(1)PDTQRK	0.574889	-0.247907	-0.822796	1.38266	LPS down p ≥ -log10 1.3	68		Q541A5	ufd1;UFD1L
P46783	RPS10;RPS10P5	wt(166)	#N/A	KAEAGAGS(0.999)AT(0.001)EFQFR	0.226136	-0.601965	-0.8281	1.50899	LPS down p ≥ -log10 1.3	81				#N/A	#N/A											#N/A	#N/A									A0A0B4J1S8	PI4KB	C70A(182)	C70A(225)	S(0.004)KS(0.996)DATASISLSSNLK	-0.563745	-1.39459	-0.830846	1.76274	LPS down p ≥ -log10 1.3	69		D3DPS3	RPRC1;MAP7D1
A0A096LNX8	SCARF2	wt(166)	wt+LPS(162)	HSAAAAGRAPS(1)PPPPGSEAAPS(0.985)PS(0.014)K	1.06894	0.235598	-0.833345	1.56686	LPS down p ≥ -log10 1.3	82				#N/A	#N/A											#N/A	#N/A									O95218	ZRANB2	C70A(182)	C70A(225)	YNLDAS(1)EEEDSNKK	1.03209	0.197253	-0.834837	1.87534	LPS down p ≥ -log10 1.3	70		B4DDR0	POLR3E
A0A024R9R5	ZFP106;ZNF106	wt(166)	wt+LPS(162)	NRENS(1)PSSQSAGLSSINK	0.102106	-0.734731	-0.836836	1.37851	LPS down p ≥ -log10 1.3	83				#N/A	#N/A											#N/A	#N/A									Q9NTI5	PDS5B	C70A(182)	C70A(225)	EDILENEDEQNS(1)PPKK	0.425326	-0.435086	-0.860412	1.84506	LPS down p ≥ -log10 1.3	71		Q9HB90	RRAGC
Q4VB24	HIST1H1E	wt(166)	#N/A	S(0.023)ET(0.977)APAAPAAPAPAEKT(1)PVKK	1.52232	0.68475	-0.837571	1.85428	LPS down p ≥ -log10 1.3	84				#N/A	#N/A											#N/A	#N/A									Q9H116	GZF1	C70A(182)	#N/A	TAEGDVGDY(0.002)RCPQDQS(0.997)PDRVGT(0.001)EMEQVSK	0.535419	-0.3371	-0.872519	1.582	LPS down p ≥ -log10 1.3	72		Q05CW4	WHSC1
Q9ULJ3	ZBTB21	wt(166)	#N/A	S(0.937)LS(0.062)MDS(0.001)QVPVYSPSIDLK	-0.209606	-1.07679	-0.867188	1.43745	LPS down p ≥ -log10 1.3	85				#N/A	#N/A											#N/A	#N/A									P62070	RRAS2	C70A(182)	C70A(225)	FQEQECPPS(1)PEPTRK	2.46502	1.5829	-0.882117	2.50115	LPS down p ≥ -log10 1.3	73		Q9BYW2	SETD2
Q9BX95	SGPP1	wt(166)	wt+LPS(162)	RNS(1)LTGEEGQLAR	1.89259	1.02084	-0.871741	1.32429	LPS down p ≥ -log10 1.3	86				#N/A	#N/A											#N/A	#N/A									Q92538	GBF1	C70A(182)	C70A(225)	ADAPDAGAQS(0.995)DS(0.003)ELPS(0.001)Y(0.001)HQNDVSLDR	0.864194	-0.0338259	-0.89802	1.9653	LPS down p ≥ -log10 1.3	74		Q9BYW2	SETD2
B4DDU5	DBNL	wt(166)	wt+LPS(162)	ERAMS(0.999)T(0.001)TSISSPQPGK	2.25022	1.37402	-0.876198	1.48304	LPS down p ≥ -log10 1.3	87				#N/A	#N/A											#N/A	#N/A									A0A024QZH6	SR-A1;SCAF1	C70A(182)	C70A(225)	AAPPPPALT(1)PDSQTVDSSCK	-1.1062	-2.01892	-0.91272	1.47952	LPS down p ≥ -log10 1.3	75		Q9NR30	DDX21
A0A140VK53	SRRM2	wt(166)	wt+LPS(162)	SRS(1)VS(1)PCSNVESR	0.798248	-0.0787209	-0.876968	2.19019	LPS down p ≥ -log10 1.3	88				#N/A	#N/A											#N/A	#N/A									Q05BS8	SFRS2IP;SCAF11	C70A(182)	C70A(225)	S(0.001)RFHS(0.178)PS(0.092)T(0.144)T(0.585)WS(1)PNK	-0.415749	-1.33552	-0.919773	2.16839	LPS down p ≥ -log10 1.3	76		B7Z954	TJP2
Q8NFC6	BOD1L1	wt(166)	wt+LPS(162)	T(0.002)QLS(0.996)PS(0.002)IK	0.450278	-0.429537	-0.879815	1.74667	LPS down p ≥ -log10 1.3	89				#N/A	#N/A											#N/A	#N/A									A8K0P2	PPA2	C70A(182)	C70A(225)	SLVESVSS(0.061)S(0.939)PNK	0.482996	-0.44667	-0.929666	1.5442	LPS down p ≥ -log10 1.3	77		A0A024R0C7	CTTNBP2NL;DKFZp547A023
F8VWH9	ARFGAP1	wt(166)	wt+LPS(162)	TLPSMVHRVS(1)GQPQSVTASSDK	0.917101	0.0325958	-0.884505	1.80406	LPS down p ≥ -log10 1.3	90				#N/A	#N/A											#N/A	#N/A									C9J0I9	ZC3HC1	#N/A	#N/A	SWDS(0.01)S(0.045)S(0.944)PVDRPEPEAASPTTR	0.550313	-0.403626	-0.953939	1.84321	LPS down p ≥ -log10 1.3	78		O75976	CPD
B4DZR9	SCML2	wt(166)	wt+LPS(162)	TESSPSEASQHSMQS(1)PQK	2.13707	1.24123	-0.895839	1.51989	LPS down p ≥ -log10 1.3	91				#N/A	#N/A											#N/A	#N/A									A8K964	PNN	C70A(182)	C70A(225)	EIAIVHS(1)DAEKEQEEEEQKQEMEVK	2.00387	1.04832	-0.955547	2.04483	LPS down p ≥ -log10 1.3	79		A0A0S2Z4Z9	NONO
Q9H7S9	ZNF703	wt(166)	#N/A	DQEPKPS(1)PEPAAVSR	0.321721	-0.575328	-0.897049	2.08591	LPS down p ≥ -log10 1.3	92				#N/A	#N/A											#N/A	#N/A									A0A024QZQ1	SIRT1	#N/A	C70A(225)	ADEAALALQPGGS(0.97)PS(0.346)AAGADREAAS(0.342)S(0.342)PAGEPLRK	3.11808	2.15444	-0.963646	2.95338	LPS down p ≥ -log10 1.3	80		A9UEZ6	BCR/ABL fusion;BCR/ABL1 fusion;BCR-ABL1;BCR
B7Z738	SCFD1	wt(166)	wt+LPS(162)	VNLEESSGVENS(1)PAGARPK	0.257085	-0.658884	-0.915969	2.11617	LPS down p ≥ -log10 1.3	93				#N/A	#N/A											#N/A	#N/A									Q7Z6E9	RBBP6	C70A(182)	C70A(225)	VTGTEGSSSTLVDYTSTSSTGGS(1)PVRK	0.987479	0.0165072	-0.970972	1.8816	LPS down p ≥ -log10 1.3	81		P35548	MSX2
K7EIY0	PTPN2	wt(166)	#N/A	ELSKEDLSPAFDHS(1)PNK	1.02873	0.096058	-0.932673	2.04788	LPS down p ≥ -log10 1.3	94				#N/A	#N/A											#N/A	#N/A									Q9NYV4	CDK12	#N/A	C70A(225)	NSS(1)PAPPQPAPGK	1.72459	0.718175	-1.00642	1.44616	LPS down p ≥ -log10 1.3	82		P31350	RRM2;hCG_23833;RR2M
O95785	WIZ	wt(166)	wt+LPS(162)	S(0.001)PQLS(0.003)LS(0.996)PRPAS(1)PK	1.6285	0.678684	-0.949816	1.45161	LPS down p ≥ -log10 1.3	95				#N/A	#N/A											#N/A	#N/A									Q9NR30	DDX21	C70A(182)	C70A(225)	VTKNEEPS(1)EEEIDAPKPK	3.83365	2.82559	-1.00806	1.9731	LPS down p ≥ -log10 1.3	83		C9JME2	FARP1
O95785	WIZ	wt(166)	#N/A	TQSRPGGPPNPPGPS(1)PK	-0.307804	-1.27235	-0.964544	2.70416	LPS down p ≥ -log10 1.3	96				#N/A	#N/A											#N/A	#N/A									E7ETY2	TCOF1	C70A(182)	#N/A	QEAKPQQAAGMLS(1)PK	2.17663	1.15656	-1.02007	2.42776	LPS down p ≥ -log10 1.3	84		A0A0S2Z4G7	NPM1
Q9H6F5	CCDC86	wt(166)	wt+LPS(162)	APGS(0.998)PRGQHEPS(0.002)KPPPAGETVTGGFGAK	2.76531	1.80031	-0.965003	2.11756	LPS down p ≥ -log10 1.3	97				#N/A	#N/A											#N/A	#N/A									A0A024R5M3	CTTN	C70A(182)	C70A(225)	T(0.067)QT(0.933)PPVS(0.001)PAPQPTEERLPSSPVYEDAASFK	1.82714	0.806247	-1.02089	1.83689	LPS down p ≥ -log10 1.3	85		A0A024RBE7	TMPO
Q9BQG0	MYBBP1A	wt(166)	wt+LPS(162)	SPAPGAPT(0.003)RS(0.996)PS(0.001)TPAK	0.994801	0.0207575	-0.974043	1.40876	LPS down p ≥ -log10 1.3	98				#N/A	#N/A											#N/A	#N/A									Q5T200	ZC3H13	C70A(182)	C70A(225)	KGPRT(1)PS(1)PPPPIPEDIALGK	0.165753	-0.861149	-1.0269	1.60919	LPS down p ≥ -log10 1.3	86		A8KAE0	WDHD1
F5H0Q6	CLASRP	wt(166)	wt+LPS(162)	LTRPAAS(1)PAVGEK	1.40139	0.426753	-0.974634	2.62041	LPS down p ≥ -log10 1.3	99				#N/A	#N/A											#N/A	#N/A									Q5T200	ZC3H13	C70A(182)	C70A(225)	KGPRT(1)PS(1)PPPPIPEDIALGK	0.165753	-0.861149	-1.0269	1.60919	LPS down p ≥ -log10 1.3	87		A0A024R1J3	CDC42EP1
P83369	LSM11	wt(166)	wt+LPS(162)	S(0.011)AGAGS(0.989)PARPPS(1)PR	0.00546136	-0.976706	-0.982167	1.55994	LPS down p ≥ -log10 1.3	100				#N/A	#N/A											#N/A	#N/A									Q92878	RAD50	C70A(182)	C70A(225)	LFDVCGS(1)QDFESDLDRLK	-0.384307	-1.43131	-1.047	1.67677	LPS down p ≥ -log10 1.3	88		Q8IYB7	DIS3L2
C9JME2	FARP1	wt(166)	#N/A	VSAGEPGS(0.03)HPS(0.97)PAPRRS(1)PAGNK	2.0121	1.02544	-0.986664	1.37586	LPS down p ≥ -log10 1.3	101				#N/A	#N/A											#N/A	#N/A									Q9Y2W1	THRAP3	C70A(182)	C70A(225)	KSPVGKS(1)PPSTGSTYGSSQK	3.40669	2.35485	-1.05184	2.42562	LPS down p ≥ -log10 1.3	89		B2R6N9	SSR1
Q6P6C2	ALKBH5	wt(166)	#N/A	SYESSEDCSEAAGS(1)PARK	1.17458	0.184012	-0.990565	1.60057	LPS down p ≥ -log10 1.3	102				#N/A	#N/A											#N/A	#N/A									C9J4K0	C2orf49	#N/A	C70A(225)	SPSGPVKS(1)PPLS(1)PVGTTPVK	0.522314	-0.554451	-1.07676	2.08801	LPS down p ≥ -log10 1.3	90		Q12888	TP53BP1
Q12846	STX4;STX4A	wt(166)	wt+LPS(162)	AIEPQKEEADENYNS(1)VNTR	-0.354523	-1.34654	-0.992017	1.92827	LPS down p ≥ -log10 1.3	103				#N/A	#N/A											#N/A	#N/A									Q9BYW2	SETD2	C70A(182)	C70A(225)	KS(0.967)ES(0.032)PFRETEPLVSPHQDK	0.936007	-0.143544	-1.07955	1.3993	LPS down p ≥ -log10 1.3	91		V9HWE1	HEL113;VIM
A0A087WVZ6	ZMYND8;DKFZp564P1772	wt(166)	wt+LPS(162)	EPKEPS(1)PKQDVVGK	0.751605	-0.249969	-1.00157	1.64543	LPS down p ≥ -log10 1.3	104				#N/A	#N/A											#N/A	#N/A									Q96T23	RSF1	C70A(182)	C70A(225)	STLES(0.001)EKPGS(0.999)PEAAETSPPSNIIDHCEK	3.10882	2.02721	-1.0816	1.61692	LPS down p ≥ -log10 1.3	92		Q53HL1	MYL12A;MYL12B;MYL9
Q9NYL2	ZAK	wt(166)	#N/A	S(0.001)S(0.002)S(0.997)PT(0.001)QYGLTK	-0.353966	-1.3581	-1.00414	2.28967	LPS down p ≥ -log10 1.3	105				#N/A	#N/A											#N/A	#N/A									Q9UK76	HN1	C70A(182)	C70A(225)	RNS(1)SEASSGDFLDLK	2.86128	1.77238	-1.0889	1.32553	LPS down p ≥ -log10 1.3	93		Q8N612	FAM160A2
O60832	DKC1	wt(166)	wt+LPS(162)	AGLESGAEPGDGDS(1)DTTKK	1.05299	0.0459895	-1.007	1.94141	LPS down p ≥ -log10 1.3	106				#N/A	#N/A											#N/A	#N/A									B4DY33	KIAA0415;FOXK1	C70A(182)	C70A(225)	EGS(1)PIPHDPEFGSK	2.32847	1.23916	-1.0893	1.81802	LPS down p ≥ -log10 1.3	94		E7EVA0	MAP4;DKFZp547H1810
Q9NQT8	KIF13B	wt(166)	wt+LPS(162)	GRWES(1)QQDVSQTTVSR	0.0239512	-1.01645	-1.0404	1.71857	LPS down p ≥ -log10 1.3	107				#N/A	#N/A											#N/A	#N/A									E9PPY3	RRP8	C70A(182)	C70A(225)	ALEAASLS(0.001)QHPPS(0.003)LCIS(0.997)DS(1)EEEEEERK	1.60192	0.500486	-1.10144	1.46219	LPS down p ≥ -log10 1.3	95		O60264	SMARCA5
Q9Y4H2	IRS2	wt(166)	#N/A	SRTDSLAAT(1)PPAAK	-0.405048	-1.44989	-1.04484	1.32878	LPS down p ≥ -log10 1.3	108				#N/A	#N/A											#N/A	#N/A									E9PPY3	RRP8	C70A(182)	C70A(225)	ALEAASLS(0.001)QHPPS(0.003)LCIS(0.997)DS(1)EEEEEERK	1.60192	0.500486	-1.10144	1.46219	LPS down p ≥ -log10 1.3	96		Q9Y4H2	IRS2
A0A024R0V3	KLC3	wt(166)	wt+LPS(162)	TLSAS(0.991)T(0.009)QDLSPH	-0.437135	-1.49836	-1.06123	1.70021	LPS down p ≥ -log10 1.3	109				#N/A	#N/A											#N/A	#N/A									Q5T6U8	HMGA1	#N/A	C70A(225)	KQPPKEPSEVPT(1)PK	1.71249	0.606639	-1.10585	1.68871	LPS down p ≥ -log10 1.3	97		B3KN83	C14orf46;LIN52
Q8WWM7	ATXN2L	wt(166)	#N/A	GINGGPSRMS(1)PK	2.17775	1.11192	-1.06583	2.70104	LPS down p ≥ -log10 1.3	110				#N/A	#N/A											#N/A	#N/A									Q59FW1	MTA1	C70A(182)	C70A(225)	VAPVINNGS(0.022)PT(0.978)ILGK	0.297146	-0.814421	-1.11157	1.55864	LPS down p ≥ -log10 1.3	98		H3BUV9	UBL7
A8K126	ZNF198;ZMYM2	wt(166)	wt+LPS(162)	MTGSAPPPS(1)PTPNK	0.0744644	-0.996273	-1.07074	1.71335	LPS down p ≥ -log10 1.3	111				#N/A	#N/A											#N/A	#N/A									B7ZA74	RAD23B	C70A(182)	C70A(225)	PAETPVATS(1)PTATDSTSGDSSR	0.415508	-0.76182	-1.17733	2.56577	LPS down p ≥ -log10 1.3	99		Q68E05	DKFZp686A1765;TPD52L2
Q9HCD5	NCOA5	wt(166)	#N/A	MNTAPSRPS(0.997)PT(0.003)R	1.893	0.810444	-1.08256	1.81425	LPS down p ≥ -log10 1.3	112				#N/A	#N/A											#N/A	#N/A									A0A087X0K9	TJP1;DKFZp686A1195;DKFZp686M05161	C70A(182)	C70A(225)	IDS(1)PGFKPASQQVYRK	0.753262	-0.450648	-1.20391	1.32498	LPS down p ≥ -log10 1.3	100		D3DWB6	USP9X
Q05CW4	WHSC1	wt(166)	#N/A	RIQDPTEDAEAEDT(1)PRK	1.21906	0.134814	-1.08424	1.41866	LPS down p ≥ -log10 1.3	113				#N/A	#N/A											#N/A	#N/A									A0A024R9D2	MTDH	C70A(182)	C70A(225)	SQEPIPDDQKVS(1)DDDKEK	2.21915	0.95166	-1.26749	2.15438	LPS down p ≥ -log10 1.3	101		Q2VPE7	PTTG1;PTTG;PTTG2
Q9NQS7	INCENP	wt(166)	wt+LPS(162)	HSPIAPS(0.001)S(0.998)PS(0.001)PQVLAQK	0.948309	-0.145268	-1.09358	1.57972	LPS down p ≥ -log10 1.3	114				#N/A	#N/A											#N/A	#N/A									Q0P607	SFRS15;SCAF4	C70A(182)	C70A(225)	KPENEVAQNGGAETSHTEPVS(1)PIPK	3.29954	2.02922	-1.27033	1.3702	LPS down p ≥ -log10 1.3	102		B3KN47	ANAPC4
Q9NPI1	BRD7	wt(166)	wt+LPS(162)	EREDSGDAEAHAFKS(0.996)PS(0.004)K	0.901761	-0.20787	-1.10963	1.32223	LPS down p ≥ -log10 1.3	115				#N/A	#N/A											#N/A	#N/A									H0Y2V6	CEP170	C70A(182)	C70A(225)	ARLGEAS(1)DSELADADK	0.106805	-1.18178	-1.28858	1.87269	LPS down p ≥ -log10 1.3	103		Q8NDC0	MAPK1IP1L
C9JME2	FARP1	wt(166)	#N/A	VSAGEPGSHPS(1)PAPRRS(1)PAGNK	2.6541	1.5371	-1.11699	1.58821	LPS down p ≥ -log10 1.3	116				#N/A	#N/A											#N/A	#N/A									B7ZLP5	SAFB;SAFB2	C70A(182)	C70A(225)	SEPVKEES(0.977)S(0.023)ELEQPFAQDTSSVGPDRK	2.60216	1.3033	-1.29886	1.91171	LPS down p ≥ -log10 1.3	104		Q5JSB5	TFDP1
Q7Z6E9	RBBP6	wt(166)	wt+LPS(162)	PSANRENFS(1)PER	1.04323	-0.0914416	-1.13467	1.37301	LPS down p ≥ -log10 1.3	117				#N/A	#N/A											#N/A	#N/A									Q9BQG0	MYBBP1A	C70A(182)	C70A(225)	KNQKPSQVNGAPGS(1)PTEPAGQK	1.6384	0.292989	-1.34541	2.13638	LPS down p ≥ -log10 1.3	105		A0A024QZQ1	SIRT1
Q9NV56	MRGBP	wt(166)	#N/A	VLTANSNPS(0.001)S(0.998)PS(0.001)AAK	1.12442	-0.0295672	-1.15399	1.81785	LPS down p ≥ -log10 1.3	118				#N/A	#N/A											#N/A	#N/A									A0A1U9X609	ABCF1	C70A(182)	C70A(225)	GGNVFAALIQDQS(1)EEEEEEEKHPPK	2.13136	0.785219	-1.34614	1.70724	LPS down p ≥ -log10 1.3	106		A0A0G2JPP5	SCRIB
D6W5C0	SPTBN1	wt(166)	#N/A	AQTLPTSVVTITSES(0.009)S(0.991)PGKR	0.679173	-0.502106	-1.18128	2.80589	LPS down p ≥ -log10 1.3	119				#N/A	#N/A											#N/A	#N/A									P41208	CETN2	C70A(182)	#N/A	RMS(1)PKPELTEEQK	1.5724	-0.111186	-1.68359	2.60998	LPS down p ≥ -log10 1.3	107		Q96DV6	RPS6
Q59GV6	STRN4	wt(166)	#N/A	ERLGGSVLGQIPFLQNCEDEDS(1)DEDDELDSVQHK	0.813855	-0.370512	-1.18437	2.57834	LPS down p ≥ -log10 1.3	120				#N/A	#N/A											#N/A	#N/A									Q9UIG0	BAZ1B	C70A(182)	C70A(225)	KSDGACDS(0.015)PS(0.99)S(0.995)DKENSSQIAQDHQK	2.22197	0.411607	-1.81036	2.17386	LPS down p ≥ -log10 1.3	108		Q7Z5L9	IRF2BP2
A0A0U1RRM6	ENAH	wt(166)	wt+LPS(162)	TNTMNGS(1)KSPVISRPK	2.22981	1.04272	-1.18709	1.44446	LPS down p ≥ -log10 1.3	121				#N/A	#N/A											#N/A	#N/A									Q9UIG0	BAZ1B	C70A(182)	C70A(225)	KSDGACDS(0.015)PS(0.99)S(0.995)DKENSSQIAQDHQK	2.22197	0.411607	-1.81036	2.17386	LPS down p ≥ -log10 1.3	109		E9PM17	PAK1
Q5W012	RBM17	wt(166)	wt+LPS(162)	RPDPDS(1)DEDEDYERER	0.79789	-0.421033	-1.21892	1.65361	LPS down p ≥ -log10 1.3	122				#N/A	#N/A											#N/A	#N/A									K9JA46	EL52;HSP90AA1	C70A(182)	C70A(225)	ESEDKPEIEDVGS(1)DEEEEKK	2.07727	0.259577	-1.81769	1.99606	LPS down p ≥ -log10 1.3	110		Q7Z5L9	IRF2BP2
B4DZQ5		wt(166)	#N/A	EVIDAS(1)DKEGMS(1)PAKR	1.29673	0.0185322	-1.27819	3.07237	LPS down p ≥ -log10 1.3	123				#N/A	#N/A											#N/A	#N/A									A0A140VK53	SRRM2	C70A(182)	C70A(225)	RGEGDAPFSEPGTTSTQRPS(0.973)S(0.024)PET(0.001)AT(0.001)K	3.57688	0.454321	-3.12256	1.51637	LPS down p ≥ -log10 1.3	111		Q15311	RALBP1
Q12888	TP53BP1	wt(166)	wt+LPS(162)	QSQQPMKPIS(1)PVKDPVSPASQK	1.60123	0.318634	-1.2826	1.86169	LPS down p ≥ -log10 1.3	124				#N/A	#N/A											#N/A	#N/A									B5BUB5	SSB	C70A(182)	#N/A	T(0.914)KFAS(0.086)DDEHDEHDENGATGPVK	2.60026	-1.7358	-4.33606	4.71862	LPS down p ≥ -log10 1.3	112		Q9NRY4	ARHGAP35
Q5UIP0	RIF1	wt(166)	#N/A	RSQEDEIS(0.002)S(0.998)PVNK	1.20393	-0.107817	-1.31175	3.30127	LPS down p ≥ -log10 1.3	125				#N/A	#N/A											#N/A	#N/A											#N/A	#N/A									A0A024R4A5	TNRC15;GIGYF2
M0R0F9	TRIP10;STP	wt(166)	wt+LPS(162)	VLSNRGDS(1)LSR	0.664804	-0.668015	-1.33282	1.86253	LPS down p ≥ -log10 1.3	126				#N/A	#N/A											#N/A	#N/A											#N/A	#N/A									A0A0S2Z4G7	NPM1
B7Z7U0	SRRM1	wt(166)	wt+LPS(162)	RQS(0.997)PS(0.004)PS(0.948)T(0.051)RPIR	1.66729	0.222288	-1.445	2.94042	LPS down p ≥ -log10 1.3	127				#N/A	#N/A											#N/A	#N/A											#N/A	#N/A									Q6PK21	OGFR
P52948	NUP98	#N/A	#N/A	YGLQDS(1)DEEEEEHPSK	2.19028	0.745213	-1.44507	1.49338	LPS down p ≥ -log10 1.3	128				#N/A	#N/A											#N/A	#N/A											#N/A	#N/A									O75179	ANKRD17
O75533	SF3B1	wt(166)	#N/A	T(0.066)MIIS(0.934)PERLDPFADGGKT(1)PDPK	1.32982	-0.235518	-1.56534	1.69751	LPS down p ≥ -log10 1.3	129				#N/A	#N/A											#N/A	#N/A											#N/A	#N/A									A0A0A0MT60	FKBP15
A0A140VK53	SRRM2	wt(166)	wt+LPS(162)	RS(0.999)RS(0.001)VSPCSNVES(1)R	1.41934	-0.154742	-1.57408	2.37355	LPS down p ≥ -log10 1.3	130				#N/A	#N/A											#N/A	#N/A											#N/A	#N/A									B4DZQ5
Q8TEW0	PARD3	wt(166)	wt+LPS(162)	RS(0.093)S(0.906)DPALIGLS(0.001)TSVSDSNFSSEEPSRK	2.19497	0.574137	-1.62084	1.44172	LPS down p ≥ -log10 1.3	131				#N/A	#N/A											#N/A	#N/A											#N/A	#N/A									B5MCX3	37500
Q9NYV4	CDK12	#N/A	wt+LPS(162)	NSS(1)PAPPQPAPGK	1.76296	0.131572	-1.63139	1.34622	LPS down p ≥ -log10 1.3	132				#N/A	#N/A											#N/A	#N/A											#N/A	#N/A									Q5W9G0	KIAA0638;PHLDB1
B4DDK7	SNIP1	wt(166)	wt+LPS(162)	RPDHS(0.031)GGS(0.969)PS(1)PPTSEPAR	1.04479	-1.21636	-2.26115	1.60462	LPS down p ≥ -log10 1.3	133				#N/A	#N/A											#N/A	#N/A											#N/A	#N/A									E5KTA5	UNG
B3KXA1	AEBP2	wt(166)	#N/A	AAAITDMADLEELSRLS(1)PLPPGS(0.804)PGS(0.196)AAR	1.84834	-0.471924	-2.32027	1.86801	LPS down p ≥ -log10 1.3	134				#N/A	#N/A											#N/A	#N/A											#N/A	#N/A									Q8N122	RPTOR
Q96DV6	RPS6	#N/A	#N/A	LS(0.424)S(0.576)LRAS(0.191)T(0.608)S(0.201)KS(0.999)ES(0.071)S(0.929)QK	1.77751	-0.771409	-2.54892	1.64148	LPS down p ≥ -log10 1.3	135				#N/A	#N/A											#N/A	#N/A											#N/A	#N/A									A8K489	WTAP;DKFZp686F20131
B3KXA1	AEBP2	wt(166)	#N/A	LSPLPPGS(0.979)PGS(0.021)AAR	1.84834	-1.11916	-2.96751	2.0865	LPS down p ≥ -log10 1.3	136				#N/A	#N/A											#N/A	#N/A											#N/A	#N/A									A8K3X3	DSN1
			#N/A											#N/A	#N/A											#N/A	#N/A											#N/A	#N/A									Q8NE01	CNNM3
			#N/A											#N/A	#N/A											#N/A	#N/A											#N/A	#N/A									Q8TAP8	PPP1R35
			#N/A											#N/A	#N/A											#N/A	#N/A											#N/A	#N/A									Q6IB11	PGRMC1
			#N/A											#N/A	#N/A											#N/A	#N/A											#N/A	#N/A									A0A0D9SEV0	PNKP
			#N/A											#N/A	#N/A											#N/A	#N/A											#N/A	#N/A									F2Z2E2	IQGAP3
			#N/A											#N/A	#N/A											#N/A	#N/A											#N/A	#N/A									D3DPS3	RPRC1;MAP7D1
			#N/A											#N/A	#N/A											#N/A	#N/A											#N/A	#N/A									B3KW05	GPRASP2
			#N/A											#N/A	#N/A											#N/A	#N/A											#N/A	#N/A									A8K6Y1	PA2G4
			#N/A											#N/A	#N/A											#N/A	#N/A											#N/A	#N/A									Q96MW1	CCDC43
			#N/A											#N/A	#N/A											#N/A	#N/A											#N/A	#N/A									Q4KMP7	TBC1D10B
			#N/A											#N/A	#N/A											#N/A	#N/A											#N/A	#N/A									Q6P6C2	ALKBH5
			#N/A											#N/A	#N/A											#N/A	#N/A											#N/A	#N/A									B4DFV1	PRKCD
			#N/A											#N/A	#N/A											#N/A	#N/A											#N/A	#N/A									B4DFV1	PRKCD
			#N/A											#N/A	#N/A											#N/A	#N/A											#N/A	#N/A									B3KUJ5	HDAC2
			#N/A											#N/A	#N/A											#N/A	#N/A											#N/A	#N/A									Q4KMP7	TBC1D10B
			#N/A											#N/A	#N/A											#N/A	#N/A											#N/A	#N/A									X5D7D8	DLX2
			#N/A											#N/A	#N/A											#N/A	#N/A											#N/A	#N/A									Q7Z5L9	IRF2BP2
			#N/A											#N/A	#N/A											#N/A	#N/A											#N/A	#N/A									Q96GX2	ATXN7L3B
			#N/A											#N/A	#N/A											#N/A	#N/A											#N/A	#N/A									B7Z5R7	CLASP1
			#N/A											#N/A	#N/A											#N/A	#N/A											#N/A	#N/A									H3BQ37	EDC3
			#N/A											#N/A	#N/A											#N/A	#N/A											#N/A	#N/A									B7ZM10	XPO6
			#N/A											#N/A	#N/A											#N/A	#N/A											#N/A	#N/A									P36871	PGM1
			#N/A											#N/A	#N/A											#N/A	#N/A											#N/A	#N/A									Q9UIG0	BAZ1B
			#N/A											#N/A	#N/A											#N/A	#N/A											#N/A	#N/A									P42166	TMPO
			#N/A											#N/A	#N/A											#N/A	#N/A											#N/A	#N/A									V9HW98	HEL2;YWHAE;YWHAE/FAM22B fusion;YWHAE/FAM22A fusion
			#N/A											#N/A	#N/A											#N/A	#N/A											#N/A	#N/A									B4DFV1	PRKCD
			#N/A											#N/A	#N/A											#N/A	#N/A											#N/A	#N/A									J3KPJ3	CAMKK1
			#N/A											#N/A	#N/A											#N/A	#N/A											#N/A	#N/A									A2A2D0	STMN1
			#N/A											#N/A	#N/A											#N/A	#N/A											#N/A	#N/A									P49792	RGPD3;RGPD1;RGPD2;RANBP2;RGPD4
			#N/A											#N/A	#N/A											#N/A	#N/A											#N/A	#N/A									B7Z876	SCAF8
			#N/A											#N/A	#N/A											#N/A	#N/A											#N/A	#N/A									O94906	PRPF6
			#N/A											#N/A	#N/A											#N/A	#N/A											#N/A	#N/A									Q92545	TMEM131
			#N/A											#N/A	#N/A											#N/A	#N/A											#N/A	#N/A									Q9NV56	MRGBP
			#N/A											#N/A	#N/A											#N/A	#N/A											#N/A	#N/A									P52948	NUP98
			#N/A											#N/A	#N/A											#N/A	#N/A											#N/A	#N/A									Q9Y5Q9	GTF3C3
			#N/A											#N/A	#N/A											#N/A	#N/A											#N/A	#N/A									B4DFU0	DKFZp686L1814;LIN54;DKFZp686L18142
			#N/A											#N/A	#N/A											#N/A	#N/A											#N/A	#N/A									Q5TCQ9	MAGI3
			#N/A											#N/A	#N/A											#N/A	#N/A											#N/A	#N/A									P16402	HIST1H1D
			#N/A											#N/A	#N/A											#N/A	#N/A											#N/A	#N/A									Q8WYQ5	DGCR8
			#N/A											#N/A	#N/A											#N/A	#N/A											#N/A	#N/A									Q96T23	RSF1
			#N/A											#N/A	#N/A											#N/A	#N/A											#N/A	#N/A									H3BT22	ORC6;ORC6L
			#N/A											#N/A	#N/A											#N/A	#N/A											#N/A	#N/A									B3KN47	ANAPC4
			#N/A											#N/A	#N/A											#N/A	#N/A											#N/A	#N/A									B4DKT9	CTNNA1
			#N/A											#N/A	#N/A											#N/A	#N/A											#N/A	#N/A									P42684	ABL2
			#N/A											#N/A	#N/A											#N/A	#N/A											#N/A	#N/A									D6W5C0	SPTBN1
			#N/A											#N/A	#N/A											#N/A	#N/A											#N/A	#N/A									Q4VB24	HIST1H1E
			#N/A											#N/A	#N/A											#N/A	#N/A											#N/A	#N/A									U3KQ35	TERF2
			#N/A											#N/A	#N/A											#N/A	#N/A											#N/A	#N/A									O43719	HTATSF1
			#N/A											#N/A	#N/A											#N/A	#N/A											#N/A	#N/A									A8K724	PAK4
			#N/A											#N/A	#N/A											#N/A	#N/A											#N/A	#N/A									Q9ULJ3	ZBTB21
			#N/A											#N/A	#N/A											#N/A	#N/A											#N/A	#N/A									A0A024RDE8	PDLIM5;LIM
			#N/A											#N/A	#N/A											#N/A	#N/A											#N/A	#N/A									Q05BL1	TP53BP2
			#N/A											#N/A	#N/A											#N/A	#N/A											#N/A	#N/A									F1T0I1	SEC16A
			#N/A											#N/A	#N/A											#N/A	#N/A											#N/A	#N/A									I3L254	TFAP4
			#N/A											#N/A	#N/A											#N/A	#N/A											#N/A	#N/A									H3BTX0	PAGR1
			#N/A											#N/A	#N/A											#N/A	#N/A											#N/A	#N/A									Q9UKL0	RCOR1
			#N/A											#N/A	#N/A											#N/A	#N/A											#N/A	#N/A									A6N6J7	JARID1C;KDM5C
			#N/A											#N/A	#N/A											#N/A	#N/A											#N/A	#N/A									V9HWI5	HEL-S-15;CFL1
			#N/A											#N/A	#N/A											#N/A	#N/A											#N/A	#N/A									D3DPU2	CAP1
			#N/A											#N/A	#N/A											#N/A	#N/A											#N/A	#N/A									E9PBS1	PAICS
			#N/A											#N/A	#N/A											#N/A	#N/A											#N/A	#N/A									Q8N3F8	MICALL1;MICAL-L1;DKFZp686M2226
			#N/A											#N/A	#N/A											#N/A	#N/A											#N/A	#N/A									A8K724	PAK4
			#N/A											#N/A	#N/A											#N/A	#N/A											#N/A	#N/A									Q96T58	SPEN
			#N/A											#N/A	#N/A											#N/A	#N/A											#N/A	#N/A									F8VY35	NAP1L1
			#N/A											#N/A	#N/A											#N/A	#N/A											#N/A	#N/A									Q8N122	RPTOR
			#N/A											#N/A	#N/A											#N/A	#N/A											#N/A	#N/A									A0A024RAZ7	HNRPA1;HNRNPA1;RP11-78J21.1;HNRNPA1L2
			#N/A											#N/A	#N/A											#N/A	#N/A											#N/A	#N/A									A0A0A0MRA8	EPB41L3
			#N/A											#N/A	#N/A											#N/A	#N/A											#N/A	#N/A									O00178	GTPBP1
			#N/A											#N/A	#N/A											#N/A	#N/A											#N/A	#N/A									Q8IWA0	WDR75
			#N/A											#N/A	#N/A											#N/A	#N/A											#N/A	#N/A									P68363	TUBA1A;TUBA1B;TUBA1C;TUBA2;TUBA3C;TUBA3E
			#N/A											#N/A	#N/A											#N/A	#N/A											#N/A	#N/A									A0A024R7L5	UPF1
			#N/A											#N/A	#N/A											#N/A	#N/A											#N/A	#N/A									O00178	GTPBP1
			#N/A											#N/A	#N/A											#N/A	#N/A											#N/A	#N/A									Q9ULM3	YEATS2
			#N/A											#N/A	#N/A											#N/A	#N/A											#N/A	#N/A									A0A024RBK4	TRAFD1
			#N/A											#N/A	#N/A											#N/A	#N/A											#N/A	#N/A									Q96RU3	FNBP1
			#N/A											#N/A	#N/A											#N/A	#N/A											#N/A	#N/A									Q9H6L6	FAM129B;C9orf88
			#N/A											#N/A	#N/A											#N/A	#N/A											#N/A	#N/A									B9EGI2	MPRIP;Mprip-Ntrk1 fusion gene
			#N/A											#N/A	#N/A											#N/A	#N/A											#N/A	#N/A									A0A0A0MS59	SRCAP
			#N/A											#N/A	#N/A											#N/A	#N/A											#N/A	#N/A									Q8WW12	PCNP
			#N/A											#N/A	#N/A											#N/A	#N/A											#N/A	#N/A									Q9NQZ2	UTP3
			#N/A											#N/A	#N/A											#N/A	#N/A											#N/A	#N/A									Q9Y2X3	NOP58
			#N/A											#N/A	#N/A											#N/A	#N/A											#N/A	#N/A									E9PS47	PTDSS2
			#N/A											#N/A	#N/A											#N/A	#N/A											#N/A	#N/A									F8VPD4	CAD
			#N/A											#N/A	#N/A											#N/A	#N/A											#N/A	#N/A									Q9UHR4	BAIAP2L1
			#N/A											#N/A	#N/A											#N/A	#N/A											#N/A	#N/A									B4DSI9	EIF4G1;EIF4G1 variant protein
			#N/A											#N/A	#N/A											#N/A	#N/A											#N/A	#N/A									A0A024R542	TNKS1BP1
			#N/A											#N/A	#N/A											#N/A	#N/A											#N/A	#N/A									A0A087WXV6	OTUD5
			#N/A											#N/A	#N/A											#N/A	#N/A											#N/A	#N/A									C9JA69	BBX
			#N/A											#N/A	#N/A											#N/A	#N/A											#N/A	#N/A									Q60FE6	FLNA;FLJ00119
			#N/A											#N/A	#N/A											#N/A	#N/A											#N/A	#N/A									Q6FI03	G3BP;DKFZp686L1159;G3BP1
			#N/A											#N/A	#N/A											#N/A	#N/A											#N/A	#N/A									A0A087WYN9	DHX29
			#N/A											#N/A	#N/A											#N/A	#N/A											#N/A	#N/A									J3KS37	RECQL5;PP1045
			#N/A											#N/A	#N/A											#N/A	#N/A											#N/A	#N/A									E3UVQ2	BCOR-RARA;BCOR
			#N/A											#N/A	#N/A											#N/A	#N/A											#N/A	#N/A									B7Z687	ROBO1
			#N/A											#N/A	#N/A											#N/A	#N/A											#N/A	#N/A									B7Z5R7	CLASP1
			#N/A											#N/A	#N/A											#N/A	#N/A											#N/A	#N/A									A0A0C4DGU2	MMACHC
			#N/A											#N/A	#N/A											#N/A	#N/A											#N/A	#N/A									O95817	BAG3
			#N/A											#N/A	#N/A											#N/A	#N/A											#N/A	#N/A									Q8N995	HMGCS1
			#N/A											#N/A	#N/A											#N/A	#N/A											#N/A	#N/A									B2R4C9	DAP
			#N/A											#N/A	#N/A											#N/A	#N/A											#N/A	#N/A									B1AKL4	EIF4ENIF1
			#N/A											#N/A	#N/A											#N/A	#N/A											#N/A	#N/A									O75533	SF3B1
			#N/A											#N/A	#N/A											#N/A	#N/A											#N/A	#N/A									Q4VB24	HIST1H1E;HIST1H1D
			#N/A											#N/A	#N/A											#N/A	#N/A											#N/A	#N/A									Q9BTC0	DIDO1
			#N/A											#N/A	#N/A											#N/A	#N/A											#N/A	#N/A									A0A024RAM4	MAP1B;DKFZp686F1345
			#N/A											#N/A	#N/A											#N/A	#N/A											#N/A	#N/A									P33981	TTK
			#N/A											#N/A	#N/A											#N/A	#N/A											#N/A	#N/A									A9CQZ8	TJP1;DKFZp686A1195;DKFZp686M05161
			#N/A											#N/A	#N/A											#N/A	#N/A											#N/A	#N/A									Q5UIP0	RIF1
			#N/A											#N/A	#N/A											#N/A	#N/A											#N/A	#N/A									G8JLB6	HNRNPH1
			#N/A											#N/A	#N/A											#N/A	#N/A											#N/A	#N/A									Q7Z4Q2	HEATR3
			#N/A											#N/A	#N/A											#N/A	#N/A											#N/A	#N/A									A4LAA3	ATRX
			#N/A											#N/A	#N/A											#N/A	#N/A											#N/A	#N/A									A0A090N8Y8	ZNRF2
			#N/A											#N/A	#N/A											#N/A	#N/A											#N/A	#N/A									Q96QR8	PURB
			#N/A											#N/A	#N/A											#N/A	#N/A											#N/A	#N/A									Q03188	CENPC
			#N/A											#N/A	#N/A											#N/A	#N/A											#N/A	#N/A									Q68DU0	DKFZp781O2021;CTNND1
			#N/A											#N/A	#N/A											#N/A	#N/A											#N/A	#N/A									Q96T58	SPEN
			#N/A											#N/A	#N/A											#N/A	#N/A											#N/A	#N/A									B8Y6Z5	ILKAP;ILKAP2;ILKAP3
			#N/A											#N/A	#N/A											#N/A	#N/A											#N/A	#N/A									B7ZLP5	SAFB
			#N/A											#N/A	#N/A											#N/A	#N/A											#N/A	#N/A									A0A024R5M3	CTTN
			#N/A											#N/A	#N/A											#N/A	#N/A											#N/A	#N/A									Q5HYJ3	FAM76B
			#N/A											#N/A	#N/A											#N/A	#N/A											#N/A	#N/A									A0A024R1I7	TFIP11
			#N/A											#N/A	#N/A											#N/A	#N/A											#N/A	#N/A									Q92625	ANKS1A
			#N/A											#N/A	#N/A											#N/A	#N/A											#N/A	#N/A									Q5H9N4	CDK2;CDK3;DKFZp686L20222;CDK1;CDC2
			#N/A											#N/A	#N/A											#N/A	#N/A											#N/A	#N/A									Q12888	TP53BP1
			#N/A											#N/A	#N/A											#N/A	#N/A											#N/A	#N/A									O75367	H2AFY
			#N/A											#N/A	#N/A											#N/A	#N/A											#N/A	#N/A									B7Z4V7	ZNF800
			#N/A											#N/A	#N/A											#N/A	#N/A											#N/A	#N/A									Q53ET0	CRTC2
			#N/A											#N/A	#N/A											#N/A	#N/A											#N/A	#N/A									Q5H9N4	CDK2;CDK3;DKFZp686L20222;CDK1;CDC2
			#N/A											#N/A	#N/A											#N/A	#N/A											#N/A	#N/A									Q59FP7	DNMT1
			#N/A											#N/A	#N/A											#N/A	#N/A											#N/A	#N/A									A0A024R2T2	KIAA1143
			#N/A											#N/A	#N/A											#N/A	#N/A											#N/A	#N/A									G1UD80	SPACIA2;FAM122B
			#N/A											#N/A	#N/A											#N/A	#N/A											#N/A	#N/A									B3KS44	SF4;SUGP1
			#N/A											#N/A	#N/A											#N/A	#N/A											#N/A	#N/A									Q8N4C8	MINK1
			#N/A											#N/A	#N/A											#N/A	#N/A											#N/A	#N/A									J3KP75	PHACTR2
			#N/A											#N/A	#N/A											#N/A	#N/A											#N/A	#N/A									Q15300	RET/PTC2;PRKAR1A;PRKAR1A/RARA fusion;DKFZp779L0468
			#N/A											#N/A	#N/A											#N/A	#N/A											#N/A	#N/A									D6PAV9	ITSN1
			#N/A											#N/A	#N/A											#N/A	#N/A											#N/A	#N/A									P46019	PHKA1;PHKA2
			#N/A											#N/A	#N/A											#N/A	#N/A											#N/A	#N/A									B7Z6F7	SYMPK;SYMPK variant protein
			#N/A											#N/A	#N/A											#N/A	#N/A											#N/A	#N/A									J3KTL2	SRSF1
			#N/A											#N/A	#N/A											#N/A	#N/A											#N/A	#N/A									A0A0C4DGG1	PACSIN3
			#N/A											#N/A	#N/A											#N/A	#N/A											#N/A	#N/A									J3QQW9	SUZ12
			#N/A											#N/A	#N/A											#N/A	#N/A											#N/A	#N/A									Q9Y2V2	CARHSP1
			#N/A											#N/A	#N/A											#N/A	#N/A											#N/A	#N/A									A0A024R5M9	NUMA1;NUMA1 variant protein
			#N/A											#N/A	#N/A											#N/A	#N/A											#N/A	#N/A									Q5QNY5	PEX19
			#N/A											#N/A	#N/A											#N/A	#N/A											#N/A	#N/A									O95453	PARN
			#N/A											#N/A	#N/A											#N/A	#N/A											#N/A	#N/A									O94819	KBTBD11
			#N/A											#N/A	#N/A											#N/A	#N/A											#N/A	#N/A									Q9BUA3	C11orf84
			#N/A											#N/A	#N/A											#N/A	#N/A											#N/A	#N/A									D3DVA5	ARHGEF2
			#N/A											#N/A	#N/A											#N/A	#N/A											#N/A	#N/A									C9JWC4	HJURP
			#N/A											#N/A	#N/A											#N/A	#N/A											#N/A	#N/A									Q9Y4H2	IRS2
			#N/A											#N/A	#N/A											#N/A	#N/A											#N/A	#N/A									O95425	SVIL
			#N/A											#N/A	#N/A											#N/A	#N/A											#N/A	#N/A									B4DYU9	ORC2L;ORC2
			#N/A											#N/A	#N/A											#N/A	#N/A											#N/A	#N/A									Q5VT52	RPRD2
			#N/A											#N/A	#N/A											#N/A	#N/A											#N/A	#N/A									E9PGM9	RBM6
			#N/A											#N/A	#N/A											#N/A	#N/A											#N/A	#N/A									Q9Y3Z3	SAMHD1
			#N/A											#N/A	#N/A											#N/A	#N/A											#N/A	#N/A									A0A1B0GWE0
			#N/A											#N/A	#N/A											#N/A	#N/A											#N/A	#N/A									Q96N67	DOCK7
			#N/A											#N/A	#N/A											#N/A	#N/A											#N/A	#N/A									P11388	TOP2A
			#N/A											#N/A	#N/A											#N/A	#N/A											#N/A	#N/A									O95453	PARN
			#N/A											#N/A	#N/A											#N/A	#N/A											#N/A	#N/A									Q13177	PAK2
			#N/A											#N/A	#N/A											#N/A	#N/A											#N/A	#N/A									A0A0G2JPP5	SCRIB
			#N/A											#N/A	#N/A											#N/A	#N/A											#N/A	#N/A									Q6FHL9	PEA15
			#N/A											#N/A	#N/A											#N/A	#N/A											#N/A	#N/A									B4DZR9	SCML2
			#N/A											#N/A	#N/A											#N/A	#N/A											#N/A	#N/A									Q9UPJ7	PkB-like 2;PkB-like 1;PDPK1;PDPK2P
			#N/A											#N/A	#N/A											#N/A	#N/A											#N/A	#N/A									A0A024RCC9	NAP1L4
			#N/A											#N/A	#N/A											#N/A	#N/A											#N/A	#N/A									Q6NUR1	NCAPG
			#N/A											#N/A	#N/A											#N/A	#N/A											#N/A	#N/A									O60341	KDM1A
			#N/A											#N/A	#N/A											#N/A	#N/A											#N/A	#N/A									G1UI22	MLLT4
			#N/A											#N/A	#N/A											#N/A	#N/A											#N/A	#N/A									F1T0I1	SEC16A
			#N/A											#N/A	#N/A											#N/A	#N/A											#N/A	#N/A									Q9NY27	PPP4R2
			#N/A											#N/A	#N/A											#N/A	#N/A											#N/A	#N/A									A0A0B4J1S8	PI4KB
			#N/A											#N/A	#N/A											#N/A	#N/A											#N/A	#N/A									A0A024RCR5	BRD2
			#N/A											#N/A	#N/A											#N/A	#N/A											#N/A	#N/A									Q0D2M5	SNW1
			#N/A											#N/A	#N/A											#N/A	#N/A											#N/A	#N/A									P16403	HIST1H1C
			#N/A											#N/A	#N/A											#N/A	#N/A											#N/A	#N/A									P38159	RBMX
			#N/A											#N/A	#N/A											#N/A	#N/A											#N/A	#N/A									P38432	COIL
			#N/A											#N/A	#N/A											#N/A	#N/A											#N/A	#N/A									P49916	LIG3
			#N/A											#N/A	#N/A											#N/A	#N/A											#N/A	#N/A									P42858	HTT;HD
			#N/A											#N/A	#N/A											#N/A	#N/A											#N/A	#N/A									Q9HB90	RRAGC;RRAGD
			#N/A											#N/A	#N/A											#N/A	#N/A											#N/A	#N/A									F6VRR5	POLDIP3;PDIP46;DKFZp434G0310
			#N/A											#N/A	#N/A											#N/A	#N/A											#N/A	#N/A									Q9Y2W1	THRAP3
			#N/A											#N/A	#N/A											#N/A	#N/A											#N/A	#N/A									H0YNJ9	DUT
			#N/A											#N/A	#N/A											#N/A	#N/A											#N/A	#N/A									A8K4Z6	BUD13
			#N/A											#N/A	#N/A											#N/A	#N/A											#N/A	#N/A									A0A024R5U3	ARPP-19;ARPP19
			#N/A											#N/A	#N/A											#N/A	#N/A											#N/A	#N/A									A0A1L1UHR1	VDAC1
			#N/A											#N/A	#N/A											#N/A	#N/A											#N/A	#N/A									F5H0Q6	CLASRP
			#N/A											#N/A	#N/A											#N/A	#N/A											#N/A	#N/A									Q96T58	SPEN
			#N/A											#N/A	#N/A											#N/A	#N/A											#N/A	#N/A									A0A1U9XBE3	MDC1
			#N/A											#N/A	#N/A											#N/A	#N/A											#N/A	#N/A									A0A1U9XBD9
			#N/A											#N/A	#N/A											#N/A	#N/A											#N/A	#N/A									A0A0G2JPP5	SCRIB
			#N/A											#N/A	#N/A											#N/A	#N/A											#N/A	#N/A									Q4G0J3	LARP7
			#N/A											#N/A	#N/A											#N/A	#N/A											#N/A	#N/A									Q14684	RRP1B
			#N/A											#N/A	#N/A											#N/A	#N/A											#N/A	#N/A									Q5VT52	RPRD2
			#N/A											#N/A	#N/A											#N/A	#N/A											#N/A	#N/A									Q0MQR4	PARG
			#N/A											#N/A	#N/A											#N/A	#N/A											#N/A	#N/A									Q0D2M5	SNW1
			#N/A											#N/A	#N/A											#N/A	#N/A											#N/A	#N/A									B2RCD8	IRF2BP1
			#N/A											#N/A	#N/A											#N/A	#N/A											#N/A	#N/A									B4DXU3	TOMM34
			#N/A											#N/A	#N/A											#N/A	#N/A											#N/A	#N/A									D6W5C0	SPTBN1
			#N/A											#N/A	#N/A											#N/A	#N/A											#N/A	#N/A									P18583	SON
			#N/A											#N/A	#N/A											#N/A	#N/A											#N/A	#N/A									A0A024R6M2	KIAA2010;SMEK1
			#N/A											#N/A	#N/A											#N/A	#N/A											#N/A	#N/A									A0A024QZW7	NUP153
			#N/A											#N/A	#N/A											#N/A	#N/A											#N/A	#N/A									O76021	RSL1D1
			#N/A											#N/A	#N/A											#N/A	#N/A											#N/A	#N/A									A0A024R1T9	ACLY;ACLY variant protein
			#N/A											#N/A	#N/A											#N/A	#N/A											#N/A	#N/A									Q9H1E3	NUCKS1
			#N/A											#N/A	#N/A											#N/A	#N/A											#N/A	#N/A									A0A024R8B6	NUP214;DKFZp686J0330
			#N/A											#N/A	#N/A											#N/A	#N/A											#N/A	#N/A									Q9BQG0	MYBBP1A
			#N/A											#N/A	#N/A											#N/A	#N/A											#N/A	#N/A									D3DVA5	ARHGEF2
			#N/A											#N/A	#N/A											#N/A	#N/A											#N/A	#N/A									Q8NEN9	PDZD8
			#N/A											#N/A	#N/A											#N/A	#N/A											#N/A	#N/A									P46013	MKI67
			#N/A											#N/A	#N/A											#N/A	#N/A											#N/A	#N/A									Q9Y4H2	IRS2
			#N/A											#N/A	#N/A											#N/A	#N/A											#N/A	#N/A									Q02952	AKAP12
			#N/A											#N/A	#N/A											#N/A	#N/A											#N/A	#N/A									Q6NZY4	ZCCHC8
			#N/A											#N/A	#N/A											#N/A	#N/A											#N/A	#N/A									P55265	ADAR
			#N/A											#N/A	#N/A											#N/A	#N/A											#N/A	#N/A									P42566	EPS15
			#N/A											#N/A	#N/A											#N/A	#N/A											#N/A	#N/A									A0A140VK53	SRRM2;KIAA0324
			#N/A											#N/A	#N/A											#N/A	#N/A											#N/A	#N/A									Q96JM3	CHAMP1
			#N/A											#N/A	#N/A											#N/A	#N/A											#N/A	#N/A									Q92945	KHSRP
			#N/A											#N/A	#N/A											#N/A	#N/A											#N/A	#N/A									B4DUJ0	PSMF1
			#N/A											#N/A	#N/A											#N/A	#N/A											#N/A	#N/A									Q53HL2	CDCA8
			#N/A											#N/A	#N/A											#N/A	#N/A											#N/A	#N/A									Q16514	TAF12
			#N/A											#N/A	#N/A											#N/A	#N/A											#N/A	#N/A									C9J4K0	C2orf49
			#N/A											#N/A	#N/A											#N/A	#N/A											#N/A	#N/A									A0A0S2Z5P5	MCMBP
			#N/A											#N/A	#N/A											#N/A	#N/A											#N/A	#N/A									A0A024R1A3	UBE1;UBA1
			#N/A											#N/A	#N/A											#N/A	#N/A											#N/A	#N/A									B4DZR9	SCML2
			#N/A											#N/A	#N/A											#N/A	#N/A											#N/A	#N/A									Q9C0C9	UBE2O
			#N/A											#N/A	#N/A											#N/A	#N/A											#N/A	#N/A									Q8NC51	DKFZp686P17171;SERBP1
			#N/A											#N/A	#N/A											#N/A	#N/A											#N/A	#N/A									Q05519	SRSF11;DKFZp686P22142;DKFZp686D02116;SFRS11
			#N/A											#N/A	#N/A											#N/A	#N/A											#N/A	#N/A									D3DVC4	NES
			#N/A											#N/A	#N/A											#N/A	#N/A											#N/A	#N/A									B4DUJ0	PSMF1
			#N/A											#N/A	#N/A											#N/A	#N/A											#N/A	#N/A									C9J0I9	ZC3HC1
			#N/A											#N/A	#N/A											#N/A	#N/A											#N/A	#N/A									A0A0G2JPP5	SCRIB
			#N/A											#N/A	#N/A											#N/A	#N/A											#N/A	#N/A									D3DVA5	ARHGEF2
			#N/A											#N/A	#N/A											#N/A	#N/A											#N/A	#N/A									P46013	MKI67
			#N/A											#N/A	#N/A											#N/A	#N/A											#N/A	#N/A									Q96KM6	ZNF512B
			#N/A											#N/A	#N/A											#N/A	#N/A											#N/A	#N/A									P07197	NEFM
			#N/A											#N/A	#N/A											#N/A	#N/A											#N/A	#N/A									Q6PJT7	ZC3H14;FLJ11806
			#N/A											#N/A	#N/A											#N/A	#N/A											#N/A	#N/A									A0A024RB22	SMARCC2
			#N/A											#N/A	#N/A											#N/A	#N/A											#N/A	#N/A									F8WAE5	EIF2A
			#N/A											#N/A	#N/A											#N/A	#N/A											#N/A	#N/A									Q96AY4	TTC28
			#N/A											#N/A	#N/A											#N/A	#N/A											#N/A	#N/A									Q9HCK8	CHD8
			#N/A											#N/A	#N/A											#N/A	#N/A											#N/A	#N/A									P20700	LMNB1
			#N/A											#N/A	#N/A											#N/A	#N/A											#N/A	#N/A									E9PF10	NUP155
			#N/A											#N/A	#N/A											#N/A	#N/A											#N/A	#N/A									A0A024R663	KTN1
			#N/A											#N/A	#N/A											#N/A	#N/A											#N/A	#N/A									Q6PJT7	ZC3H14
			#N/A											#N/A	#N/A											#N/A	#N/A											#N/A	#N/A									P57740	NUP107
			#N/A											#N/A	#N/A											#N/A	#N/A											#N/A	#N/A									P78346	RPP30
			#N/A											#N/A	#N/A											#N/A	#N/A											#N/A	#N/A									Q05519	SRSF11;DKFZp686P22142;DKFZp686D02116;SFRS11
			#N/A											#N/A	#N/A											#N/A	#N/A											#N/A	#N/A									Q59F73	ADRBK1
			#N/A											#N/A	#N/A											#N/A	#N/A											#N/A	#N/A									Q9Y6A5	TACC3
			#N/A											#N/A	#N/A											#N/A	#N/A											#N/A	#N/A									Q8TEW0	PARD3
			#N/A											#N/A	#N/A											#N/A	#N/A											#N/A	#N/A									Q9NZ63	C9orf78
			#N/A											#N/A	#N/A											#N/A	#N/A											#N/A	#N/A									G3V497	EML1
			#N/A											#N/A	#N/A											#N/A	#N/A											#N/A	#N/A									Q8IXT5	RBM12B
			#N/A											#N/A	#N/A											#N/A	#N/A											#N/A	#N/A									I3L2Z9	NEURL4;hCG_42028
			#N/A											#N/A	#N/A											#N/A	#N/A											#N/A	#N/A									Q549U1	HSU53209;TRA2A
			#N/A											#N/A	#N/A											#N/A	#N/A											#N/A	#N/A									Q9NQG5	RPRD1B
			#N/A											#N/A	#N/A											#N/A	#N/A											#N/A	#N/A									E7EQD7	DLG1
			#N/A											#N/A	#N/A											#N/A	#N/A											#N/A	#N/A									O95785	WIZ
			#N/A											#N/A	#N/A											#N/A	#N/A											#N/A	#N/A									P46013	MKI67
			#N/A											#N/A	#N/A											#N/A	#N/A											#N/A	#N/A									A0A024RBX9	PDHA1;PDHA1/LOC79064;PDHA2
			#N/A											#N/A	#N/A											#N/A	#N/A											#N/A	#N/A									A0A140VK53	SRRM2;KIAA0324
			#N/A											#N/A	#N/A											#N/A	#N/A											#N/A	#N/A									A8K964	PNN
			#N/A											#N/A	#N/A											#N/A	#N/A											#N/A	#N/A									Q2L6I0	PPP1R10
			#N/A											#N/A	#N/A											#N/A	#N/A											#N/A	#N/A									Q9H8G2	CAAP1
			#N/A											#N/A	#N/A											#N/A	#N/A											#N/A	#N/A									P46013	MKI67
			#N/A											#N/A	#N/A											#N/A	#N/A											#N/A	#N/A									E7ETY2	TCOF1
			#N/A											#N/A	#N/A											#N/A	#N/A											#N/A	#N/A									P05412	JUN
			#N/A											#N/A	#N/A											#N/A	#N/A											#N/A	#N/A									P17535	JUND
			#N/A											#N/A	#N/A											#N/A	#N/A											#N/A	#N/A									Q59G75	IARS;DKFZp686L0869;DKFZp686L17145
			#N/A											#N/A	#N/A											#N/A	#N/A											#N/A	#N/A									Q9BWF3	RBM4
			#N/A											#N/A	#N/A											#N/A	#N/A											#N/A	#N/A									V9HW43	HEL-S-102;HSPB1
			#N/A											#N/A	#N/A											#N/A	#N/A											#N/A	#N/A									P07197	NEFM;NEF3
			#N/A											#N/A	#N/A											#N/A	#N/A											#N/A	#N/A									F8WF16	PPHLN1
			#N/A											#N/A	#N/A											#N/A	#N/A											#N/A	#N/A									A0A024RAN2	CAST
			#N/A											#N/A	#N/A											#N/A	#N/A											#N/A	#N/A									Q59HE3	CAST
			#N/A											#N/A	#N/A											#N/A	#N/A											#N/A	#N/A									A0A024R9Y3	HUWE1
			#N/A											#N/A	#N/A											#N/A	#N/A											#N/A	#N/A									O95785	WIZ
			#N/A											#N/A	#N/A											#N/A	#N/A											#N/A	#N/A									P12270	TPR
			#N/A											#N/A	#N/A											#N/A	#N/A											#N/A	#N/A									A0A0A0MR66	RBM10;DKFZp686E2459
			#N/A											#N/A	#N/A											#N/A	#N/A											#N/A	#N/A									A9CQZ8	TJP1;DKFZp686A1195;DKFZp686M05161
			#N/A											#N/A	#N/A											#N/A	#N/A											#N/A	#N/A									P52701	MSH6;GTBP
			#N/A											#N/A	#N/A											#N/A	#N/A											#N/A	#N/A									A0A0S2Q0B1	ARID1A;ARID1A variant protein
			#N/A											#N/A	#N/A											#N/A	#N/A											#N/A	#N/A									B3KVY9	SLC35B2
			#N/A											#N/A	#N/A											#N/A	#N/A											#N/A	#N/A									A0A1U9XBE3	MDC1
			#N/A											#N/A	#N/A											#N/A	#N/A											#N/A	#N/A									A0A087X1U6	EPPK1
			#N/A											#N/A	#N/A											#N/A	#N/A											#N/A	#N/A									B3KM42	DYNC1LI1
			#N/A											#N/A	#N/A											#N/A	#N/A											#N/A	#N/A									Q6NZY4	ZCCHC8
			#N/A											#N/A	#N/A											#N/A	#N/A											#N/A	#N/A									B4DMS5	KRR1
			#N/A											#N/A	#N/A											#N/A	#N/A											#N/A	#N/A									G8JLB6	HNRNPH1;HNRNPH2
			#N/A											#N/A	#N/A											#N/A	#N/A											#N/A	#N/A									Q5T4S7	ZUBR1;UBR4
			#N/A											#N/A	#N/A											#N/A	#N/A											#N/A	#N/A									B4DJ44	TOM1
			#N/A											#N/A	#N/A											#N/A	#N/A											#N/A	#N/A									E7EVA0	MAP4
			#N/A											#N/A	#N/A											#N/A	#N/A											#N/A	#N/A									P20700	LMNB1
			#N/A											#N/A	#N/A											#N/A	#N/A											#N/A	#N/A									Q9Y248	GINS2
			#N/A											#N/A	#N/A											#N/A	#N/A											#N/A	#N/A									P11388	TOP2A
			#N/A											#N/A	#N/A											#N/A	#N/A											#N/A	#N/A									A0A024RDD3	SEC31L1;SEC31A
			#N/A											#N/A	#N/A											#N/A	#N/A											#N/A	#N/A									Q9H4E3	E4-DBP;hCG_27698;DDX47
			#N/A											#N/A	#N/A											#N/A	#N/A											#N/A	#N/A									Q8WWM7	ATXN2L
			#N/A											#N/A	#N/A											#N/A	#N/A											#N/A	#N/A									Q53GG0	LIMA1
			#N/A											#N/A	#N/A											#N/A	#N/A											#N/A	#N/A									P49792	RANBP2
			#N/A											#N/A	#N/A											#N/A	#N/A											#N/A	#N/A									Q6URC4	DIAPH1
			#N/A											#N/A	#N/A											#N/A	#N/A											#N/A	#N/A									P37802	TAGLN3;TAGLN2
			#N/A											#N/A	#N/A											#N/A	#N/A											#N/A	#N/A									Q02952	AKAP12
			#N/A											#N/A	#N/A											#N/A	#N/A											#N/A	#N/A									B4DLG2	ZC3H11A
			#N/A											#N/A	#N/A											#N/A	#N/A											#N/A	#N/A									Q9UIG0	BAZ1B
			#N/A											#N/A	#N/A											#N/A	#N/A											#N/A	#N/A									P51610	HCFC1
			#N/A											#N/A	#N/A											#N/A	#N/A											#N/A	#N/A									A0A1U9XBE3	MDC1
			#N/A											#N/A	#N/A											#N/A	#N/A											#N/A	#N/A									B4DMD3	WBP11
			#N/A											#N/A	#N/A											#N/A	#N/A											#N/A	#N/A									A0A024RBX9	PDHA1;PDHA1/LOC79064;PDHA2
			#N/A											#N/A	#N/A											#N/A	#N/A											#N/A	#N/A									C9JFE4	GPS1
			#N/A											#N/A	#N/A											#N/A	#N/A											#N/A	#N/A									A0A024QZW7	NUP153
			#N/A											#N/A	#N/A											#N/A	#N/A											#N/A	#N/A									B2R6F3	SFRS3;SRSF3
			#N/A											#N/A	#N/A											#N/A	#N/A											#N/A	#N/A									A0A0C4DG98	THOC2
			#N/A											#N/A	#N/A											#N/A	#N/A											#N/A	#N/A									A0A0C4DG98	THOC2
			#N/A											#N/A	#N/A											#N/A	#N/A											#N/A	#N/A									B2R6D0	PSMD1
			#N/A											#N/A	#N/A											#N/A	#N/A											#N/A	#N/A									Q02952	AKAP12
			#N/A											#N/A	#N/A											#N/A	#N/A											#N/A	#N/A									B4DL70	TIMELESS
			#N/A											#N/A	#N/A											#N/A	#N/A											#N/A	#N/A									B4E2K2	hCG_28765;AKAP2
			#N/A											#N/A	#N/A											#N/A	#N/A											#N/A	#N/A									O00567	NOP56
			#N/A											#N/A	#N/A											#N/A	#N/A											#N/A	#N/A									Q96DV6	RPS6
			#N/A											#N/A	#N/A											#N/A	#N/A											#N/A	#N/A									Q53GX4	FKBP5
			#N/A											#N/A	#N/A											#N/A	#N/A											#N/A	#N/A									I6L9C8	ZNF428
			#N/A											#N/A	#N/A											#N/A	#N/A											#N/A	#N/A									Q3B726	TWISTNB
			#N/A											#N/A	#N/A											#N/A	#N/A											#N/A	#N/A									Q8WUA4	GTF3C2
			#N/A											#N/A	#N/A											#N/A	#N/A											#N/A	#N/A									P07197	NEFM;NEF3
			#N/A											#N/A	#N/A											#N/A	#N/A											#N/A	#N/A									O43598	DNPH1
			#N/A											#N/A	#N/A											#N/A	#N/A											#N/A	#N/A									Q13263	TRIM28
			#N/A											#N/A	#N/A											#N/A	#N/A											#N/A	#N/A									B2RAH5	PPP1R12A
			#N/A											#N/A	#N/A											#N/A	#N/A											#N/A	#N/A									P49792	RANBP2
			#N/A											#N/A	#N/A											#N/A	#N/A											#N/A	#N/A									A0A0C4DGS9	CEPT1
			#N/A											#N/A	#N/A											#N/A	#N/A											#N/A	#N/A									B4DYY5	UBAP2L
			#N/A											#N/A	#N/A											#N/A	#N/A											#N/A	#N/A									P80723	BASP1
			#N/A											#N/A	#N/A											#N/A	#N/A											#N/A	#N/A									B9EGI2	MPRIP;M-RIP;KIAA0864
			#N/A											#N/A	#N/A											#N/A	#N/A											#N/A	#N/A									A0A024RBX9	PDHA1;PDHA1/LOC79064
			#N/A											#N/A	#N/A											#N/A	#N/A											#N/A	#N/A									Q9BUA3	C11orf84
			#N/A											#N/A	#N/A											#N/A	#N/A											#N/A	#N/A									A0A024R3T8	PARP1
			#N/A											#N/A	#N/A											#N/A	#N/A											#N/A	#N/A									Q92878	RAD50
			#N/A											#N/A	#N/A											#N/A	#N/A											#N/A	#N/A									B2R6D0	PSMD1
			#N/A											#N/A	#N/A											#N/A	#N/A											#N/A	#N/A									V9HW44	HEL-S-303;PAFAH1B2
			#N/A											#N/A	#N/A											#N/A	#N/A											#N/A	#N/A									P49321	NASP
			#N/A											#N/A	#N/A											#N/A	#N/A											#N/A	#N/A									Q9NZL4	HSPBP1
			#N/A											#N/A	#N/A											#N/A	#N/A											#N/A	#N/A									Q5U0A0	PSMA5
			#N/A											#N/A	#N/A											#N/A	#N/A											#N/A	#N/A									V9HWN7	HEL-S-87p;ALDOA
			#N/A											#N/A	#N/A											#N/A	#N/A											#N/A	#N/A									A8K964	PNN
			#N/A											#N/A	#N/A											#N/A	#N/A											#N/A	#N/A									B2R5U1	SND1
			#N/A											#N/A	#N/A											#N/A	#N/A											#N/A	#N/A									B2R6D0	PSMD1
			#N/A											#N/A	#N/A											#N/A	#N/A											#N/A	#N/A									A8K3Z5	NUP35
			#N/A											#N/A	#N/A											#N/A	#N/A											#N/A	#N/A									B4DH44	MAP2K4
			#N/A											#N/A	#N/A											#N/A	#N/A											#N/A	#N/A									A4D177	CBX3
			#N/A											#N/A	#N/A											#N/A	#N/A											#N/A	#N/A									P29966	MARCKS
			#N/A											#N/A	#N/A											#N/A	#N/A											#N/A	#N/A									B4DLR3	HNRNPU
			#N/A											#N/A	#N/A											#N/A	#N/A											#N/A	#N/A									A0A024RA49	ANLN
			#N/A											#N/A	#N/A											#N/A	#N/A											#N/A	#N/A									Q549C5	MST065;TOMM22
			#N/A											#N/A	#N/A											#N/A	#N/A											#N/A	#N/A									P29966	MARCKS
			#N/A											#N/A	#N/A											#N/A	#N/A											#N/A	#N/A									P49006	MARCKSL1
			#N/A											#N/A	#N/A											#N/A	#N/A											#N/A	#N/A									P17096	HMGA1
			#N/A											#N/A	#N/A											#N/A	#N/A											#N/A	#N/A									Q5JR94	RPS8
[truncated: 83 more columns]

## Sheet: Venns
Names	total	elements											Names	total	elements									Names	total	elements										Names	total	elements									Names	total	elements
C70A wt	17	SQNPLRS(1)FK											P-mut wt	9	SRS(1)VS(1)PCSNVESR									P-mim wt	15	KPPAPDPFARS(0.048)S(0.952)PR										C70A P-mim P-mut	16	S(1)QEEPKDTFEHDPSESIDEFNK									wt+EBSS+LPS wt+LPS wt-EBSS	24	TPAAAAAMNLAS(1)PR
		HS(0.001)DS(0.001)GT(0.001)S(0.001)EAS(0.03)LS(0.965)PPS(0.542)S(0.458)PPS(0.001)RPR													APGS(0.998)PRGQHEPS(0.002)KPPPAGETVTGGFGAK											SQNPLRS(1)FK												ETNLDS(1)LPLVDTHSK											SPSGPVKS(1)PPLS(1)PVGTTPVK
		RLS(1)LGQGDSTEAATEER													S(0.25)ET(0.75)APAAPAAPAPAEKT(1)PVKK											AAGGAT(0.028)AGS(0.97)RQPS(0.969)VET(0.032)LDSPTGSHVEWCK												S(0.001)AS(0.001)VTASS(0.003)ES(0.995)PVEIQNPYLHVEPEK											APRS(0.001)PPVGS(0.984)GPAS(0.015)GVEPTSFPVESEAR
		T(0.016)PRIS(0.984)PPIKEEETK													AAGGAT(0.028)AGS(0.97)RQPS(0.969)VET(0.032)LDSPTGSHVEWCK											FLKS(1)PPLHK												NSSTPGLQVPVS(0.006)PT(0.994)VPIQNQK											AAGGATAGS(0.001)RQPS(0.097)VET(0.894)LDS(0.008)PTGSHVEWCK
		TFPLAHS(1)PQAECEDQLDAQER													QVAEQGGDLS(1)PAANR											T(0.016)PRIS(0.984)PPIKEEETK												WLEEADSSS(0.001)GS(0.998)PTSIDK											SLS(1)GSSPCPK
		LFEES(1)DDKEDEDADGKEVEDADEK													ELS(1)QNTDESGLNDEAIAK											S(0.858)KS(0.142)PS(0.98)PPRLT(0.02)EDR												TAEGDVGDY(0.002)RCPQDQS(0.997)PDRVGT(0.001)EMEQVSK											AAGGAT(0.028)AGS(0.97)RQPS(0.969)VET(0.032)LDSPTGSHVEWCK
		NSS(1)PAPPQPAPGK													RICPVPPVS(0.005)T(0.005)VT(0.013)GDENIS(0.967)DS(0.01)EIEQYLRTPQEVR											SRTDSLAAT(1)PPAAK												SIPLECPLS(0.951)S(0.049)PK											RS(0.935)LS(0.065)EQPVMDTATATEQAK
		RICPVPPVS(0.005)T(0.005)VT(0.013)GDENIS(0.967)DS(0.01)EIEQYLRTPQEVR													AKPPADPAAAAS(1)PCR											LLSSNEDDANILSS(1)PTDR												VQMT(0.006)S(0.977)PS(0.003)S(0.001)T(0.004)GS(0.009)PMFK											MPT(0.067)QS(0.932)EEEKLS(0.002)PS(0.251)PT(0.407)T(0.341)EDPRVR
		ADGGS(1)PFLGRR													T(0.006)NT(0.991)MNGS(0.061)KS(0.942)PVISRPK											SDAEEDGGT(0.003)VS(0.997)QEEEDRKPK												RIT(0.081)S(0.918)PLMEPS(0.001)SIEK											RLS(1)LGQGDSTEAATEER
		GGVTGS(1)PEASISGSK											P-mut+LPS wt	6	GRPPAEKLS(1)PNPPK											LQGSGVSLAS(1)KK												EGFQPRS(0.001)T(0.999)DAGV											EMEDKVT(1)SPEKAEEAK
		YGLQDS(1)DEEEEEHPSK													VAPVINNGS(0.999)PT(0.001)ILGK											KPPAPDPFARS(0.971)S(0.029)PR												SS(0.001)RGELIPIS(0.995)PS(0.003)TEVGGSGIGTPPSVLK											LS(0.424)S(0.576)LRAS(0.191)T(0.608)S(0.201)KS(0.999)ES(0.071)S(0.929)QK
		VQSLEGEKLS(1)PK													KRELPSLSPAPDT(0.022)GLS(0.917)PS(0.061)K											SLSNS(0.999)NPDISGT(0.971)PT(0.021)S(0.007)PDDEVR												TVLPTVPES(1)PEEEVK											VPGMRQPAQELS(1)PTPGGTAHQALK
		KQPPKEPSEVPT(1)PK													LHS(0.01)S(0.986)S(0.004)LELGPRPLEQENER											GGPLQALT(0.001)RES(0.985)T(0.014)R												SQS(1)LPGADSLLAKPIDK											RSINKLDS(1)PDPFK
		T(0.836)PS(0.164)IQPSLLPHAAPFAK													SHGLEPAAPS(1)PR											TGADTTAAGPLFQQRPY(0.066)PS(0.934)PGAVLR												SHTSLKDELSDVSQGGS(1)K											RICPVPPVS(0.005)T(0.005)VT(0.013)GDENIS(0.967)DS(0.01)EIEQYLRTPQEVR
		ADEAALALQPGGS(0.97)PS(0.346)AAGADREAAS(0.342)S(0.342)PAGEPLRK													LAEAPS(0.001)PAPT(0.01)PS(0.031)PT(0.034)PVEDLGPQT(0.237)S(0.237)T(0.237)S(0.237)PGRLS(0.977)PDFAEELR											LAEAPS(0.001)PAPT(0.01)PS(0.031)PT(0.034)PVEDLGPQT(0.237)S(0.237)T(0.237)S(0.237)PGRLS(0.977)PDFAEELR												Y(1)MS(1)QMS(1)VPEQAELEK											GHTDTEGRPPS(1)PPPT(0.913)S(0.028)T(0.059)PEK
		SEDDSAKFDS(1)NEEDSASVFSPSFGLK											P-mut wt+LPS	4	RIT(0.081)S(0.918)PLMEPS(0.001)SIEK									P-mim+LPS wt	8	ISQDADLKT(0.999)PT(0.001)KPK												TALPTSGSSAGELELLAGEVPARS(0.997)PGAFDMS(0.003)GVR											AAESLTAIPEPAS(0.999)PQLLETPIHASQIQK
		LDRLNTVAS(1)PK													APRS(0.001)PPVGS(0.984)GPAS(0.015)GVEPTSFPVESEAR											HSGPNS(1)ADSANDGFVR										C70A P-mut	31	GGRS(1)PDEVTLTSIVPTR											TAESQT(1)PTPSATSFFSGK
C70A+LPS wt	10	AKNS(1)DLLTSPDVGLLK													S(1)YGRPPPDVEGMTSLK											T(0.006)NT(0.991)MNGS(0.061)KS(0.942)PVISRPK												RRES(0.996)LS(0.004)Y(0.001)IPK											SDAEEDGGT(0.003)VS(0.997)QEEEDRKPK
		LS(0.424)S(0.576)LRAS(0.191)T(0.608)S(0.201)KS(0.999)ES(0.071)S(0.929)QK													T(0.286)VS(0.423)GPGT(0.291)PEPRPAT(0.99)PGAS(0.002)S(0.008)VEQLRK											T(0.836)PS(0.164)IQPSLLPHAAPFAK												LSPPY(0.001)S(0.982)S(0.017)PQEFAQDVGR											AEASSLGRQS(1)PR
		GRLVREDENDAS(1)DDEDDDEK											P-mut+LPS wt+LPS	48	NSDLLT(1)SPDVGLLK											LSQSS(0.001)QDS(0.604)S(0.393)PVRNLQS(0.002)FGTEEPAYSTRR												HGSGPNIILTGDS(0.004)S(0.996)PGFSK											TQSRPGGPPNPPGPS(1)PK
		KRELPSLSPAPDT(0.022)GLS(0.917)PS(0.061)K													APPTLQAETATKPQATSAPS(1)PAPK											QVAEQGGDLS(1)PAANR												ILDPNTGEPAPVLS(0.03)S(0.969)PPPADVSTFLAFPSPEK											KAEAGAGS(0.999)AT(0.001)EFQFR
		SPMSTNSSVHTGS(1)DVEQDAEK													GGRS(1)PDEVTLTSIVPTR											S(0.001)KS(0.999)NPDFLKK												APRS(0.001)PPVGS(0.984)GPAS(0.015)GVEPTSFPVESEAR											AS(0.002)CAS(0.998)IDIEDATQHLRDILK
		ELS(1)QNTDESGLNDEAIAK													TPAAAAAMNLAS(1)PR											ADLIPY(0.004)QDS(0.996)PEGPDHSSASSGVPNPPK												SLS(1)GSSPCPK											AADRLPNLS(0.906)S(0.093)PS(0.002)AEGPPGPPSGPAPR
		LSSAHS(0.999)MS(0.001)DLSGSHMSSEK													TAESQT(1)PTPSATSFFSGK									P-mim wt+LPS	4	MPT(0.067)QS(0.932)EEEKLS(0.002)PS(0.251)PT(0.407)T(0.341)EDPRVR												S(0.018)IS(0.972)LS(0.01)QSAENVPASK											RQMS(1)VPGIFNPHEIPEEMCD
		ADGDS(1)GS(1)ERGGGGGPCGFQPASR													TPQPSS(1)PMDQMGK											SWDS(0.01)S(0.045)S(0.944)PVDRPEPEAASPTTR												INNYLTVPAHKLDS(0.995)PT(0.002)MS(0.003)R									wt+LPS wt-EBSS	107	SYESSEDCSEAAGS(1)PARK
		LSQSS(0.001)QDS(0.604)S(0.393)PVRNLQS(0.002)FGTEEPAYSTRR													KKPGDASSLPDAGLS(0.996)PGS(0.004)QVDSK											VVES(1)PDFSKDEDYLGK												TRT(0.003)DS(0.026)T(0.923)S(0.048)DGRPAWMR											GGRS(1)PDEVTLTSIVPTR
		EHNSMWAS(0.003)LS(0.013)S(0.985)PDAEAVEPDFSSIER													S(0.001)ES(0.999)MPVQLNK											VKRS(1)PDEALPGGLSGCSSGSGHSPYALER												AGGPTTPLS(0.023)PT(0.977)RLSR											LITSEEERS(1)PAK
C70A wt+LPS	11	GGRS(1)PDEVTLTSIVPTR													GFS(1)DSGGGPPAK									P-mim+LPS wt+LPS	61	APPTLQAETATKPQATSAPS(1)PAPK												RDS(0.992)S(0.008)ESQLASTESDKPTTGR											HAS(0.09)S(0.101)S(0.328)PES(0.479)PKPAPAPGS(0.996)HREIS(0.446)S(0.106)S(0.21)PT(0.129)S(0.115)K
		SFPLHS(1)PVAGVAHR													AQS(1)LLSTDREASIDILHSIVK											ALS(1)RQLS(0.821)S(0.178)GVS(0.001)EIR												KRELPSLSPAPDT(0.022)GLS(0.917)PS(0.061)K											SPPS(1)PVER
		SPSGPVKS(1)PPLS(1)PVGTTPVK													VAS(0.003)S(0.997)PVMVSNPATR											TPAAAAAMNLAS(1)PR												LRTNLQPLESTQS(1)QDF											TPQPSS(1)PMDQMGK
		LIIQSSNGHIT(0.006)T(0.009)T(0.985)PT(0.965)PT(0.035)QFLCPK													SSSQSTFHIPLS(1)PVEVKPGNVR											TPQPSS(1)PMDQMGK												NRGLS(1)APDLR											S(0.001)ES(0.999)MPVQLNK
		AAGGATAGS(0.001)RQPS(0.097)VET(0.894)LDS(0.008)PTGSHVEWCK													EGFQPRS(0.001)T(0.999)DAGV											S(0.001)ES(0.999)MPVQLNK												ELS(1)QNTDESGLNDEAIAK											GAGPQLLEELDNAPGS(0.003)DAAELELAPART(0.99)PPDS(0.007)VK
		SWDS(0.01)S(0.045)S(0.944)PVDRPEPEAASPTTR													EAPAEGEAAEPGS(1)PTAAEGEAASAASSTSSPK											GAGPQLLEELDNAPGS(0.003)DAAELELAPART(0.99)PPDS(0.007)VK												RICPVPPVS(0.005)T(0.005)VT(0.013)GDENIS(0.967)DS(0.01)EIEQYLRTPQEVR											IHS(1)PIPDMSK
		FQS(0.001)QADQDQQAS(0.007)GLQS(0.989)PPS(0.003)RDLSPTLIDNSAAK													RSLS(1)EQPVMDTATATEQAK											GFS(1)DSGGGPPAK												LS(0.001)ESQLSFRRS(0.998)PT(0.001)K											ISLPGQMAGT(1)PIT(1)PLK
		SS(0.001)RGELIPIS(0.995)PS(0.003)TEVGGSGIGTPPSVLK													RAS(1)GQAFELILS(1)PR											SFPLHS(1)PVAGVAHR												S(0.944)LNERAET(0.056)PPLPIPPPPPDIQPLER											SFPLHS(1)PVAGVAHR
		SHTSLKDELSDVSQGGS(1)K													LKS(1)EDELRPEVDEHTQK											SSSQSTFHIPLS(1)PVEVKPGNVR												LDGLVET(1)PTGYIESLPR											RRDEDMLYS(1)PELAQR
		VGAGAGAAPFREVDEIS(1)PEDDQRANR													LQQQAALS(0.999)PT(0.001)TAPAVSSVSK											LIIQSSNGHIT(0.006)T(0.009)T(0.985)PT(0.965)PT(0.035)QFLCPK												AQS(1)LLSTDREASIDILHSIVK											S(0.25)ET(0.75)APAAPAAPAPAEKT(1)PVKK
		VVES(1)PDFSKDEDYLGK													SLS(1)GSSPCPK											AAGGATAGS(0.001)RQPS(0.097)VET(0.894)LDS(0.008)PTGSHVEWCK												T(0.914)KFAS(0.086)DDEHDEHDENGATGPVK											LIIQSSNGHIT(0.006)T(0.009)T(0.985)PT(0.965)PT(0.035)QFLCPK
C70A+LPS wt+LPS	21	ALS(1)RQLS(0.821)S(0.178)GVS(0.001)EIR													SS(0.001)RGELIPIS(0.995)PS(0.003)TEVGGSGIGTPPSVLK											LQQQAALS(0.999)PT(0.001)TAPAVSSVSK												RMS(1)PKPELTEEQK											NRVPS(1)AGDVEK
		SPPS(1)PVER													S(0.001)LLNART(0.999)PENHENLFLQPPK											KLPPPPGS(1)PLGHS(0.996)PT(0.003)AS(0.001)PPPTAR												SRPTPQDY(0.002)EMRVS(0.995)PS(0.002)DTTPLVSR											HGS(1)FHEDEDPIGS(1)PR
		APRS(0.001)PPVGS(0.984)GPAS(0.015)GVEPTSFPVESEAR													DTGKT(1)PVEPEVAIHR											AAAS(0.006)VT(0.974)PPGS(0.021)LELLQPGFSK												AAQPPAQPCQLCGRS(1)PLGEAPPGTPPCR											S(1)YGRPPPDVEGMTSLK
		SLS(1)GSSPCPK													LNHVAAGLVS(1)PSLK											LNHVAAGLVS(1)PSLK												YTPTSPSYSPS(0.069)S(0.93)PEYT(0.001)PTSPK											KLPPPPGS(1)PLGHS(0.996)PT(0.003)AS(0.001)PPPTAR
		RS(0.935)LS(0.065)EQPVMDTATATEQAK													RTFS(1)EPGDHPGMLTSGK											LRS(1)DPGPPTETPSQRPSPLK												TTTAAAVAS(0.007)T(0.005)GPS(0.017)S(0.01)RS(0.96)PSTLLPK											NCEEVGLFNELAS(1)PFENEFKK
		MPT(0.067)QS(0.932)EEEKLS(0.002)PS(0.251)PT(0.407)T(0.341)EDPRVR													GLAS(1)PTAITPVASAICGK											AQPS(0.001)AS(0.998)LGVGY(0.001)R												GPPDFS(0.999)S(0.999)DEEREPT(0.044)PVLGS(0.958)GAAAAGR											AAAS(0.006)VT(0.974)PPGS(0.021)LELLQPGFSK
		NCEEVGLFNELAS(1)PFENEFKK													SQLPTLEQDGGTQNPVS(0.005)S(0.994)PGMS(0.001)QELR											GGYRQQQS(1)QTAY												S(0.01)FS(0.01)KEELMS(0.391)S(0.592)DLEET(0.99)AGS(0.005)T(0.002)S(0.001)IPK											STT(1)PTSSPFR
		AAAS(0.006)VT(0.974)PPGS(0.021)LELLQPGFSK													KFS(1)PSQVPVQTR											ANVS(0.033)S(0.967)PHREFPPATAR												KVPS(1)FTFTPTVTYQR											LNHVAAGLVS(1)PSLK
		S(0.073)AES(0.927)PTS(1)PVTSETGSTFKK													TITLVKS(1)PISVPGGSALISNLGK											ERPISLGIFPLPAGDGLLT(1)PDAQK												QEAKPQQAAGMLS(1)PK											LRS(1)DPGPPTETPSQRPSPLK
		DMES(1)PTKLDVTLAK													LIIQSSNGHIT(0.035)T(0.035)T(0.93)PT(0.994)PT(0.006)QFLCPK											RSINKLDS(1)PDPFK										C70A P-mim	53	NAASFPLRSPQPVCS(0.997)PAGS(0.003)EGTPK											RCGDSHPES(1)PVGFGHMSTTGCVLNK
		S(1)KS(1)PPKVPIVIQDDSLPAGPPPQIR													SQS(1)LPGADSLLAKPIDK											RQSNVAAPGDAT(1)PPAEK												ALS(1)RQLS(0.821)S(0.178)GVS(0.001)EIR											S(0.073)AES(0.927)PTS(1)PVTSETGSTFKK
		AQS(1)LLSTDREASIDILHSIVK													AQPS(0.001)AS(0.998)LGVGY(0.001)R											GS(1)PLNAAPYGIESMSQDTEVR												AECTARLPEASQS(1)PLVLK											INSFS(1)PQKPPGHCSR
		RIT(0.081)S(0.918)PLMEPS(0.001)SIEK													GGYRQQQS(1)QTAY											TQFEDLVPS(0.995)PT(0.005)SEK												SQNPLRS(1)FK											MAESPCSPSGQQPPS(1)PPS(1)PDELPANVK
		EGFQPRS(0.001)T(0.999)DAGV													GAAAAATGQPGTAPAGT(1)PGAPPLAGMAIVK											KPTGSLPS(0.999)PS(0.001)GVRK												SFPLHS(1)PVAGVAHR											VSAGEPGS(0.03)HPS(0.97)PAPRRS(1)PAGNK
		TLS(1)SSAQEDIIR													AIPVS(0.986)PS(0.014)AVEEDEDEDGHTVVATAR											S(0.001)T(0.001)AQQELDGKPAS(0.014)PT(0.984)PVIVASHTANKEEK												LIIQSSNGHIT(0.006)T(0.009)T(0.985)PT(0.965)PT(0.035)QFLCPK											EVIDAS(1)DKEGMS(1)PAKR
		S(0.002)GRS(0.996)PT(0.001)GNTPPVIDSVSEK													ANVS(0.033)S(0.967)PHREFPPATAR											AFS(0.936)S(0.064)PQEEEEAGFTGR												EVSSLEGS(1)PPPCLGQEEAVCTK											GVEPSPS(1)PIKPGDIK
		SQS(1)LPGADSLLAKPIDK													SHTSLKDELSDVSQGGS(1)K											NSDLLT(1)SPDVGLLK												SALPVS(0.001)PS(0.002)IS(0.001)S(0.002)APVPVEIENLPQS(0.989)PGT(0.005)DQHDRK											LFEES(1)DDKEDEDADGKEVEDADEK
		LDNARQS(1)AERNSNLVGAAHEELQQSR													Y(1)MS(1)QMS(1)VPEQAELEK											ANVS(0.853)S(0.147)PHREFPPATAR												AAGGATAGS(0.001)RQPS(0.097)VET(0.894)LDS(0.008)PTGSHVEWCK											ANVS(0.033)S(0.967)PHREFPPATAR
		Y(1)MS(1)QMS(1)VPEQAELEK													RNS(1)VERPAEPVAGAATPSLVEQQK											GPS(1)WDPFRDWYPHSR												TPPSTTVGS(0.001)HS(0.995)PPET(0.003)PVLT(0.001)R											ISTASQVSQGTGS(1)PVPK
		AADRLPNLS(0.906)S(0.093)PS(0.002)AEGPPGPPSGPAPR													RSINKLDS(1)PDPFK											KKPGDASSLPDAGLS(0.996)PGS(0.004)QVDSK												AAAMVPGRSES(1)WER											S(0.023)ET(0.977)APAAPAAPAPAEKT(1)PVKK
		TALPTSGSSAGELELLAGEVPARS(0.997)PGAFDMS(0.003)GVR													LAS(1)PELER											FQS(0.001)QADQDQQAS(0.007)GLQS(0.989)PPS(0.003)RDLSPTLIDNSAAK												ASLVALPEQTASEEET(1)PPPLLTK											VLS(1)PTAAKPSPFEGK
wt	166	SYESSEDCSEAAGS(1)PARK													GS(1)PLNAAPYGIESMSQDTEVR											NNEES(1)PTATVAEQGEDITSKK												GQSTGKGPPQS(1)PVFEGVYNNSR											RIQDPTEDAEAEDT(1)PRK
		KPPAPDPFARS(0.048)S(0.952)PR													TALPTSGSSAGELELLAGEVPARS(0.997)PGAFDMS(0.003)GVR											RIT(0.081)S(0.918)PLMEPS(0.001)SIEK												S(0.039)LS(0.912)S(0.049)PTDNLELSLR											T(0.286)VS(0.423)GPGT(0.291)PEPRPAT(0.99)PGAS(0.002)S(0.008)VEQLRK
		LITSEEERS(1)PAK													TQFEDLVPS(0.995)PT(0.005)SEK											EGFQPRS(0.001)T(0.999)DAGV												MPT(0.067)QS(0.932)EEEKLS(0.002)PS(0.251)PT(0.407)T(0.341)EDPRVR											ERS(1)PS(1)PLRGNVVPS(1)PLPTR
		RS(0.093)S(0.906)DPALIGLS(0.001)TSVSDSNFSSEEPSRK													GHTDTEGRPPS(1)PPPT(0.913)S(0.028)T(0.059)PEK											RSLS(1)EQPVMDTATATEQAK												AAAS(0.006)VT(0.974)PPGS(0.021)LELLQPGFSK											AAPQS(0.975)PS(0.025)VPK
		GINGGPSRMS(1)PK													AAESLTAIPEPAS(0.999)PQLLETPIHASQIQK											SS(0.001)RGELIPIS(0.995)PS(0.003)TEVGGSGIGTPPSVLK												AAAVAAAGAGEPQS(1)PDELLPK											LSPLPPGS(0.979)PGS(0.021)AAR
		ISQDADLKT(0.999)PT(0.001)KPK													VKRS(1)PDEALPGGLSGCSSGSGHSPYALER											S(0.001)LLNART(0.999)PENHENLFLQPPK												RQACTAQT(1)PEPLRR											AGS(1)PAPSNRLNDS(0.996)PT(0.004)LK
		LTRPAAS(1)PAVGEK													LQTTDNLLPMS(1)PEEFDEVSR											DTGKT(1)PVEPEVAIHR												SYIGSNHSSLGS(0.003)MS(0.997)PSNMEGYSK											RMS(1)GEPIQTVESIRVPGK
		SRS(1)VS(1)PCSNVESR													AFS(0.936)S(0.064)PQEEEEAGFTGR											RTFS(1)EPGDHPGMLTSGK												T(0.016)PRIS(0.984)PPIKEEETK											EIS(0.082)S(0.918)PARPCSFEEAMK
		VGGS(1)DEEASGIPSR											wt	178	ADGGS(1)PFLGRR											EVTPILAQTQSSGPQTSTTPQVLS(0.948)PT(0.038)IT(0.011)S(0.003)PPNALPR												HPNYS(1)PPGSPIEK											IGLPHS(1)IK
		QSQQPMKPIS(1)PVKDPVSPASQK													GGVTGS(1)PEASISGSK											APVHFVEPLS(0.998)PT(0.002)GVAGHRK												DY(0.002)EPPS(0.963)PS(0.035)PAPGAPPPPPQR											KPTGSLPS(0.999)PS(0.001)GVRK
		S(0.997)KLS(0.004)PS(0.997)PS(0.002)LRK													SYESSEDCSEAAGS(1)PARK											TITLVKS(1)PISVPGGSALISNLGK												VSAEAEVAPVS(0.997)PEVT(0.01)QEVVEEHCAS(0.993)PEDK											ELSKEDLSPAFDHS(1)PNK
		S(0.25)ET(0.75)APAAPAAPAPAEKT(1)PVKK													LLSSNEDDANILSS(1)PTDR											KFS(1)PSQVPVQTR												ASQSRPNS(0.963)S(0.037)ALETLGGEK											SLDGAS(1)VNENHEIYMK
		RPDPDS(1)DEDEDYERER													KPPAPDPFARS(0.048)S(0.952)PR											LIIQSSNGHIT(0.035)T(0.035)T(0.93)PT(0.994)PT(0.006)QFLCPK												SWDS(0.01)S(0.045)S(0.944)PVDRPEPEAASPTTR											ITRKPVTVSPT(0.41)T(0.59)PTS(0.999)PT(0.001)EGEAS
		VQT(0.001)T(0.999)PPPAVQGQK													DQEPKPS(1)PEPAAVSR											SQS(1)LPGADSLLAKPIDK												ADVLEAHEAEAEEPEAGKS(1)EAEDDEDEVDDLPSSR											S(0.001)T(0.001)AQQELDGKPAS(0.014)PT(0.984)PVIVASHTANKEEK
		TLPSMVHRVS(1)GQPQSVTASSDK													EREDSGDAEAHAFKS(0.996)PS(0.004)K											VAAETQS(1)PSLFGSTK												YLFNQLFGEEDADQEVS(1)PDRADPEAAWEPTEAEAR											SRTDSLAAT(1)PPAAK
		NRVPS(1)AGDVEK													GSFS(1)DTGLGDGK											GAAAAATGQPGTAPAGT(1)PGAPPLAGMAIVK												TEELIES(1)PKLESSEGEIIQTVDR											LLQTTNNS(1)PMNSKPQQIK
		HGS(1)FHEDEDPIGS(1)PR													LITSEEERS(1)PAK											AIPVS(0.986)PS(0.014)AVEEDEDEDGHTVVATAR												KQFS(1)LENVQEGEILHDAK											AFS(0.936)S(0.064)PQEEEEAGFTGR
		RVTQHES(1)DNENEIQIQNK													T(0.002)QLS(0.996)PS(0.002)IK											SHTSLKDELSDVSQGGS(1)K												T(1)FPASNYTVSSR											RKADTTTPTPTAILAPGS(1)PAS(0.999)PPGS(0.001)LEPK
		VNLEESSGVENS(1)PAGARPK													NTDSWAPPLEIVNHRS(0.258)PS(0.742)REK											Y(1)MS(1)QMS(1)VPEQAELEK												METDAPQPGLAS(1)PDSPHDPCK											ANVS(0.853)S(0.147)PHREFPPATAR
		FCS(0.001)NS(0.006)GRLS(0.993)GPAELR													GTPSQS(1)PVVGR											RNS(1)VERPAEPVAGAATPSLVEQQK												EKPELS(0.004)EPS(0.033)HLNGPS(0.861)S(0.102)DPEAAFLS(0.001)R											DQEPKPS(1)PEPAAVSR
		RTPAPPEPGS(1)PAPGEGPSGRK													RQS(0.997)PS(0.004)PS(0.948)T(0.051)RPIR											RVS(0.987)T(0.013)DLPEGQDVYTAACNSVIHR												RVS(1)FADPIYQAGLADDIDRR											NAS(1)VPNLRGSEER
		AAGGAT(0.028)AGS(0.97)RQPS(0.969)VET(0.032)LDSPTGSHVEWCK													YGLQDS(1)DEEEEEHPSK											KTPLALAGS(1)PTPK												SHILEQHPHT(0.002)LDLS(0.99)PS(0.008)EK											YGLQDS(1)DEEEEEHPSK
		RLAAAEETAVS(1)PRK													VQSLEGEKLS(1)PK											LAS(1)PELER												FQS(0.001)QADQDQQAS(0.007)GLQS(0.989)PPS(0.003)RDLSPTLIDNSAAK											LNS(0.992)EAS(0.006)PS(0.002)REAINGQREDTGDQQGLLK
		PSANRENFS(1)PER													RS(0.093)S(0.906)DPALIGLS(0.001)TSVSDSNFSSEEPSRK											AS(0.002)CAS(0.998)IDIEDATQHLRDILK												SVDYNMPRS(1)PVEMDEDFDVIFDPYAPK											TPKDS(1)PGIPPSAGAHQLFR
		ERAMS(0.999)T(0.001)TSISSPQPGK													KNS(1)LRVEGDNIYVR											AADRLPNLS(0.906)S(0.093)PS(0.002)AEGPPGPPSGPAPR												NLS(1)PGAVESDVR											ELKPQKS(1)VVS(1)DLEADDVK
		GNFGGS(1)FAGSFGGAGGHAPGVAR													GINGGPSRMS(1)PK											TALPTSGSSAGELELLAGEVPARS(0.997)PGAFDMS(0.003)GVR												T(0.836)PS(0.164)IQPSLLPHAAPFAK											NNEES(1)PTATVAEQGEDITSKK
		STT(1)PTSSPFR													NPSDSAVHS(1)PFTK											ETPHS(1)PGVEDAPIAK												NDSDLFGLGLEEAGPKES(1)S(1)EEGKEGK											RIT(0.081)S(0.918)PLMEPS(0.001)SIEK
		EIQNGNLHES(1)DSESVPR													SDAEEDGGT(0.003)VS(0.997)QEEEDRKPK											AFS(0.003)S(0.997)PQEEEEAGFTGR												LSQSS(0.001)QDS(0.604)S(0.393)PVRNLQS(0.002)FGTEEPAYSTRR											AVGRLEAVSHTSDMHRGY(0.002)ADS(0.942)PS(0.056)K
		SSSLEMTPYNT(0.001)PQLS(0.998)PATTPANKK													RRS(0.01)S(0.99)LS(0.999)PPS(0.001)S(0.001)AYER											RQMS(1)VPGIFNPHEIPEEMCD												LFTPS(0.002)RS(0.998)QEEEEEK											VAPVINNGS(0.999)PT(0.001)ILGK
		FLKS(1)PPLHK													KPS(0.978)GS(0.022)PDLWK									wt	170	SYESSEDCSEAAGS(1)PARK												IEVDEGFCS(1)PKPSEIK											EAPAEGEAAEPGS(1)PTAAEGEAASAASSTSSPK
		RCGDSHPES(1)PVGFGHMSTTGCVLNK													ISQDADLKT(0.999)PT(0.001)KPK											LITSEEERS(1)PAK												SLMS(1)S(1)PEDLTK											LQGSGVSLAS(1)KK
		HSGPNS(1)ADSANDGFVR													LTRPAAS(1)PAVGEK											RS(0.093)S(0.906)DPALIGLS(0.001)TSVSDSNFSSEEPSRK												LFPDT(1)PLALDANKK											QLS(1)SGVSEIR
		EMEDKVT(1)SPEKAEEAK													TIS(1)NPEVVMK											GINGGPSRMS(1)PK												AIPVS(0.032)PS(0.968)AVEEDEDEDGHTVVATAR											VKT(1)PEMIIQKPK
		INSFS(1)PQKPPGHCSR													SQNPLRS(1)FK											LTRPAAS(1)PAVGEK												YRPENTPEPVSTSVSHYGAEPT(0.027)T(0.196)VS(0.778)PCPS(0.803)S(0.105)S(0.091)AK											RAS(1)GQAFELILS(1)PR
		MAESPCSPSGQQPPS(1)PPS(1)PDELPANVK													AVGRLEAVSHTSDMHRGY(0.002)ADS(0.942)PS(0.056)K											SRS(1)VS(1)PCSNVESR												ASEPLLS(1)PPPFGESRK											SS(0.001)RGELIPIS(0.995)PS(0.003)TEVGGSGIGTPPSVLK
		VSAGEPGS(0.03)HPS(0.97)PAPRRS(1)PAGNK													ILELT(1)PEPDRPR											VGGS(1)DEEASGIPSR												TSSGDPPS(1)PLVK											RSQEDEIS(0.002)S(0.998)PVNK
		GVEPSPS(1)PIKPGDIK													RLS(1)NPCIQR											QSQQPMKPIS(1)PVKDPVSPASQK												S(0.771)VS(0.229)VDESRPELIFR											AGAGMITQHSSNAS(1)PINR
		EVIDAS(1)DKEGMS(1)PAKR													VGGS(1)DEEASGIPSR											S(0.997)KLS(0.004)PS(0.997)PS(0.002)LRK												VVES(1)PDFSKDEDYLGK											ADEAALALQPGGS(0.97)PS(0.346)AAGADREAAS(0.342)S(0.342)PAGEPLRK
		SKPLAAS(1)PKPAGLK													QSQQPMKPIS(1)PVKDPVSPASQK											S(0.25)ET(0.75)APAAPAAPAPAEKT(1)PVKK												AADRLPNLS(0.906)S(0.093)PS(0.002)AEGPPGPPSGPAPR											VLTANSNPS(0.001)S(0.998)PS(0.001)AAK
		RTCPSLSPTS(1)PLNNK													S(0.997)KLS(0.004)PS(0.997)PS(0.002)LRK											RPDPDS(1)DEDEDYERER												VGS(1)LDNVGHLPAGGAVK											ADGDS(1)GS(1)ERGGGGGPCGFQPASR
		SRVS(1)VS(0.335)PGRT(0.673)S(0.989)VT(0.003)K													KQPPKEPSEVPT(1)PK											TLPSMVHRVS(1)GQPQSVTASSDK												S(0.004)NS(0.996)LVSTFTMEK											LSQSS(0.001)QDS(0.604)S(0.393)PVRNLQS(0.002)FGTEEPAYSTRR
		ISTASQVSQGTGS(1)PVPK													LQGSGVSLAS(1)KK											VQT(0.001)T(0.999)PPPAVQGQK										P-mim P-mut	49	APPTLQAETATKPQATSAPS(1)PAPK											AQTLPTSVVTITSES(0.009)S(0.991)PGKR
		WDKDDFES(1)EEEDVK													RPDPDS(1)DEDEDYERER											NRVPS(1)AGDVEK												DRLGS(1)PLAVDEALRR											EVTPILAQTQSSGPQTSTTPQVLS(0.948)PT(0.038)IT(0.011)S(0.003)PPNALPR
		RNS(1)FTPLSSSNTIR													TESSPSEASQHSMQS(1)PQK											HGS(1)FHEDEDPIGS(1)PR												TPAAAAAMNLAS(1)PR											KAGLAS(1)PEEEDAVGKEPLK
		T(0.04)T(0.04)GT(0.92)PPDSSLVTYELHSRPEQDK													T(0.836)PS(0.164)IQPSLLPHAAPFAK											RVTQHES(1)DNENEIQIQNK												TPQPSS(1)PMDQMGK											IPSFFPSPEEPPS(1)PSAPSIAK
		VPGMRQPAQELS(1)PTPGGTAHQALK													TLPSMVHRVS(1)GQPQSVTASSDK											VNLEESSGVENS(1)PAGARPK												VAQRS(1)PVDSGTILREPTTK											T(0.066)MIIS(0.934)PERLDPFADGGKT(1)PDPK
		S(0.937)LS(0.062)MDS(0.001)QVPVYSPSIDLK													DFSLVRENSKET(1)FSGK											FCS(0.001)NS(0.006)GRLS(0.993)GPAELR												S(0.001)ES(0.999)MPVQLNK											LSDDFDS(1)PVK
		ET(0.003)LS(0.997)PPGNGCAIYR													VQT(0.001)T(0.999)PPPAVQGQK											HS(0.001)DS(0.001)GT(0.001)S(0.001)EAS(0.03)LS(0.965)PPS(0.542)S(0.458)PPS(0.001)RPR												GFS(1)DSGGGPPAK											TITLVKS(1)PISVPGGSALISNLGK
		S(0.023)ET(0.977)APAAPAAPAPAEKT(1)PVKK													NRVPS(1)AGDVEK											RTPAPPEPGS(1)PAPGEGPSGRK												VILERDTQRGEPEGGS(1)QDQK											S(0.002)GRS(0.996)PT(0.001)GNTPPVIDSVSEK
		S(0.858)KS(0.142)PS(0.98)PPRLT(0.02)EDR													HGS(1)FHEDEDPIGS(1)PR											PSANRENFS(1)PER												SSSQSTFHIPLS(1)PVEVKPGNVR											ERLGGSVLGQIPFLQNCEDEDS(1)DEDDELDSVQHK
		RHS(0.999)AS(0.001)NLHALAHPAPSPGSCSPK													RVTQHES(1)DNENEIQIQNK											RLAAAEETAVS(1)PRK												FLESAAADFS(1)DEDEDDDVDGREK											LIIQSSNGHIT(0.035)T(0.035)T(0.93)PT(0.994)PT(0.006)QFLCPK
		S(0.001)GHS(0.996)PT(0.004)RGAMQVAMNGK													RS(0.999)RS(0.001)VSPCSNVES(1)R											ERAMS(0.999)T(0.001)TSISSPQPGK												HVTLPS(0.862)S(0.137)PR											SQS(1)LPGADSLLAKPIDK
		LGSLSARS(0.014)DS(0.986)EATISR													VNLEESSGVENS(1)PAGARPK											GNFGGS(1)FAGSFGGAGGHAPGVAR												LQQQAALS(0.999)PT(0.001)TAPAVSSVSK											IKIEHAPS(0.997)PS(0.001)S(0.001)GGT(0.001)LK
		S(0.02)GNFGGS(0.971)RNMGGPY(0.008)GGGNYGPGGS(0.001)GGSGGYGGR													FCS(0.001)NS(0.006)GRLS(0.993)GPAELR											STT(1)PTSSPFR												AAGGAT(0.028)AGS(0.97)RQPS(0.969)VET(0.032)LDSPTGSHVEWCK											LDNARQS(1)AERNSNLVGAAHEELQQSR
		AAAITDMADLEELSRLS(1)PLPPGS(0.804)PGS(0.196)AAR													HS(0.001)DS(0.001)GT(0.001)S(0.001)EAS(0.03)LS(0.965)PPS(0.542)S(0.458)PPS(0.001)RPR											EIQNGNLHES(1)DSESVPR												RIPSIVS(0.006)S(0.994)PLNS(0.001)PLDR											SEDDSAKFDS(1)NEEDSASVFSPSFGLK
		RIQDPTEDAEAEDT(1)PRK													AIEPQKEEADENYNS(1)VNTR											RLS(1)LGQGDSTEAATEER												LNHVAAGLVS(1)PSLK											AIPVS(0.986)PS(0.014)AVEEDEDEDGHTVVATAR
		EGEEPTVYS(1)DEEEPKDESAR													RTPAPPEPGS(1)PAPGEGPSGRK											SSSLEMTPYNT(0.001)PQLS(0.998)PATTPANKK												SFS(0.998)S(0.002)PENFQR											CALS(0.007)S(0.991)PS(0.001)LAFTPPIK
		ERS(1)PS(1)PLRGNVVPS(1)PLPTR													NTDVAQS(1)PEAPKQEAPAK											RCGDSHPES(1)PVGFGHMSTTGCVLNK												AQPS(0.001)AS(0.998)LGVGY(0.001)R											S(0.002)RS(0.917)NS(0.08)GVRLDGY(0.001)AR
		SHGLEPAAPS(1)PR													RSQEDEIS(0.002)S(0.998)PVNK											TFPLAHS(1)PQAECEDQLDAQER												GGYRQQQS(1)QTAY											VGAGAGAAPFREVDEIS(1)PEDDQRANR
		RNS(1)LTGEEGQLAR													LLAEALNQVTQRAS(1)R											EMEDKVT(1)SPEKAEEAK												ANVS(0.033)S(0.967)PHREFPPATAR											AGS(1)PAPSNRLNDS(0.999)PT(0.001)LK
		DYS(0.989)PS(0.011)RNPPEVEAR													AGAGMITQHSSNAS(1)PINR											INSFS(1)PQKPPGHCSR												ISLPLPNFS(0.913)S(0.087)LNLR											S(1)GEGEVSGLMRK
		LSPLPPGS(0.979)PGS(0.021)AAR													MNTAPSRPS(0.997)PT(0.003)R											AKNS(1)DLLTSPDVGLLK												RSINKLDS(1)PDPFK											LAS(1)PELER
		AGLESGAEPGDGDS(1)DTTKK													ADEAALALQPGGS(0.97)PS(0.346)AAGADREAAS(0.342)S(0.342)PAGEPLRK											MAESPCSPSGQQPPS(1)PPS(1)PDELPANVK												RPAEAT(0.996)S(0.007)S(0.025)PT(0.279)S(0.693)PERPR											VVES(1)PDFSKDEDYLGK
		AGS(1)PAPSNRLNDS(0.996)PT(0.004)LK													PSANRENFS(1)PER											VSAGEPGS(0.03)HPS(0.97)PAPRRS(1)PAGNK												GS(1)PLNAAPYGIESMSQDTEVR											GAS(1)QAGMTGYGMPR
		VLSNRGDS(1)LSR													RLAAAEETAVS(1)PRK											EVIDAS(1)DKEGMS(1)PAKR												NREELGFRPEYSAS(1)QLK											ATDIPASAS(1)PPPVAGVPFFK
		RRS(1)IPQPHQLLGR													ADREVQAEQPSSSS(1)PR											GVEPSPS(1)PIKPGDIK												TQFEDLVPS(0.995)PT(0.005)SEK											LQSFDS(1)PERK
		S(0.001)PQLS(0.003)LS(0.996)PRPAS(1)PK													VLTANSNPS(0.001)S(0.998)PS(0.001)AAK											SKPLAAS(1)PKPAGLK												ASAVS(1)PANLPAVLLQPR											VSAGEPGSHPS(1)PAPRRS(1)PAGNK
		TLTRT(0.001)S(0.999)QETADVK													ERAMS(0.999)T(0.001)TSISSPQPGK											LS(0.424)S(0.576)LRAS(0.191)T(0.608)S(0.201)KS(0.999)ES(0.071)S(0.929)QK												T(0.006)NT(0.991)MNGS(0.061)KS(0.942)PVISRPK											TALPTSGSSAGELELLAGEVPARS(0.997)PGAFDMS(0.003)GVR
		SPAPGAPT(0.003)RS(0.996)PS(0.001)TPAK													ADGDS(1)GS(1)ERGGGGGPCGFQPASR											GRLVREDENDAS(1)DDEDDDEK												AFS(0.936)S(0.064)PQEEEEAGFTGR											AFS(0.003)S(0.997)PQEEEEAGFTGR
		AKPPADPAAAAS(1)PCR													GNFGGS(1)FAGSFGGAGGHAPGVAR											RTCPSLSPTS(1)PLNNK												NSDLLT(1)SPDVGLLK											MNS(0.998)S(0.001)FSVKPFEK
		IGLPHS(1)IK													STT(1)PTSSPFR											LFEES(1)DDKEDEDADGKEVEDADEK												DFNRT(0.002)PGS(0.997)RQAS(0.915)PT(0.085)EVVER											ADLIPY(0.004)QDS(0.996)PEGPDHSSASSGVPNPPK
		ELSKEDLSPAFDHS(1)PNK													LSQSS(0.001)QDS(0.604)S(0.393)PVRNLQS(0.002)FGTEEPAYSTRR											SRVS(1)VS(0.335)PGRT(0.673)S(0.989)VT(0.003)K												KKPGDASSLPDAGLS(0.996)PGS(0.004)QVDSK											VKRS(1)PDEALPGGLSGCSSGSGHSPYALER
		SLDGAS(1)VNENHEIYMK													AQTLPTSVVTITSES(0.009)S(0.991)PGKR											KRELPSLSPAPDT(0.022)GLS(0.917)PS(0.061)K												RSLS(1)EQPVMDTATATEQAK									wt+EBSS+LPS wt-EBSS	72	KAS(1)GPPVSELITK
		SLS(1)PGVSR													EIQNGNLHES(1)DSESVPR											ISTASQVSQGTGS(1)PVPK												RS(0.019)PS(0.975)AS(0.004)S(0.002)LSSMSSVASSVSSRPSR											LRPQSAQSSFPPS(1)PGPSPDVQLATLAQR
		RRS(1)S(0.001)LS(0.699)PPS(0.125)S(0.175)AYER													TTPPTQKPPS(1)PPMSGK											WDKDDFES(1)EEEDVK												S(0.001)LLNART(0.999)PENHENLFLQPPK											DS(0.116)YS(0.818)S(0.033)S(0.033)RSDLYSSGR
		S(0.001)S(0.002)S(0.997)PT(0.001)QYGLTK													RLS(1)LGQGDSTEAATEER											RNS(1)FTPLSSSNTIR												ASVVDPSTESSPAPQEGSEQPAS(0.015)PAS(0.971)PLS(0.007)S(0.007)R											S(0.05)LGY(0.044)HGS(0.243)S(0.243)Y(0.115)S(0.305)PEGVEPVS(0.997)PVS(0.002)S(0.001)PSLTHDK
		SRTDSLAAT(1)PPAAK													SSSLEMTPYNT(0.001)PQLS(0.998)PATTPANKK											T(0.04)T(0.04)GT(0.92)PPDSSLVTYELHSRPEQDK												DTGKT(1)PVEPEVAIHR											LVRLS(0.982)S(0.018)DSFAR
		T(0.006)NT(0.991)MNGS(0.061)KS(0.942)PVISRPK													FLKS(1)PPLHK											VPGMRQPAQELS(1)PTPGGTAHQALK												AKADS(1)PVNGLPK											VHNDAQS(1)FDYDHDAFLGAEEAK
		SGSSFVHQAS(1)FK													RCGDSHPES(1)PVGFGHMSTTGCVLNK											ET(0.003)LS(0.997)PPGNGCAIYR												RTFS(1)EPGDHPGMLTSGK											IDRGETHLWS(1)PQVSEDGK
		LLSSNEDDANILSS(1)PTDR													LTEGCS(1)FR											S(0.937)LS(0.062)MDS(0.001)QVPVYSPSIDLK												QVAEQGGDLS(1)PAANR											ALS(1)LGTIPSLTR
		DQEPKPS(1)PEPAAVSR													KPPAPDPFARS(0.971)S(0.029)PR											S(0.023)ET(0.977)APAAPAAPAPAEKT(1)PVKK												TITLVKS(1)PISVPGGSALISNLGK											SPVSLTAHSLIGAS(1)PK
		GSFS(1)DTGLGDGK													THTTALAGRS(1)PS(0.999)PAS(0.001)GR											RHS(0.999)AS(0.001)NLHALAHPAPSPGSCSPK												KFS(1)PSQVPVQTR											VEEESTGDPFGFDS(1)DDESLPVSSK
		EREDSGDAEAHAFKS(0.996)PS(0.004)K													RPDHS(0.031)GGS(0.969)PS(1)PPTSEPAR											S(0.001)GHS(0.996)PT(0.004)RGAMQVAMNGK												LIIQSSNGHIT(0.035)T(0.035)T(0.93)PT(0.994)PT(0.006)QFLCPK											MPFQT(0.05)S(0.95)PGGK
		T(0.002)QLS(0.996)PS(0.002)IK													SLSNS(0.999)NPDISGT(0.971)PT(0.021)S(0.007)PDDEVR											LGSLSARS(0.014)DS(0.986)EATISR												GAAAAATGQPGTAPAGT(1)PGAPPLAGMAIVK											ACTGLSGPGSGSKS(0.999)PPATR
		NTDSWAPPLEIVNHRS(0.258)PS(0.742)REK													AEASSLGRQS(1)PR											S(0.02)GNFGGS(0.971)RNMGGPY(0.008)GGGNYGPGGS(0.001)GGSGGYGGR												AIPVS(0.986)PS(0.014)AVEEDEDEDGHTVVATAR											RQACTAQT(1)PEPLRR
		GTPSQS(1)PVVGR													T(0.016)PRIS(0.984)PPIKEEETK											AAAITDMADLEELSRLS(1)PLPPGS(0.804)PGS(0.196)AAR												RNS(1)VERPAEPVAGAATPSLVEQQK											AIMEMPS(0.014)FY(0.001)S(0.002)HGLPRCS(0.953)PY(0.03)K
		GRPPAEKLS(1)PNPPK													TFPLAHS(1)PQAECEDQLDAQER											SPMSTNSSVHTGS(1)DVEQDAEK												LAS(1)PELER											LMSLLTSPHQPPPPPPASASPSAVPNGPQS(1)PK
		RQS(0.997)PS(0.004)PS(0.948)T(0.051)RPIR													T(0.066)MIIS(0.934)PERLDPFADGGKT(1)PDPK											RIQDPTEDAEAEDT(1)PRK												KTPSKPPAQLS(0.991)PS(0.009)VPK											VGDTEKPEPERS(1)PPNR
		KNS(1)LRVEGDNIYVR													HSGPNS(1)ADSANDGFVR											NSS(1)PAPPQPAPGK												LAEAPS(0.001)PAPT(0.01)PS(0.031)PT(0.034)PVEDLGPQT(0.237)S(0.237)T(0.237)S(0.237)PGRLS(0.977)PDFAEELR											ENQEPLRS(1)PEVGDEEALRPLTK
		NPSDSAVHS(1)PFTK													LSDDFDS(1)PVK											EGEEPTVYS(1)DEEEPKDESAR												VKRS(1)PDEALPGGLSGCSSGSGHSPYALER											RPAPPLTPGRLPS(1)IR
		SDAEEDGGT(0.003)VS(0.997)QEEEDRKPK													EMEDKVT(1)SPEKAEEAK											ERS(1)PS(1)PLRGNVVPS(1)PLPTR										C70A	225	S(0.032)GS(0.968)DAGEARPPTPASPR											FLS(0.021)HS(0.885)T(0.151)DS(0.943)LNK
		RRS(0.01)S(0.99)LS(0.999)PPS(0.001)S(0.001)AYER													ERLGGSVLGQIPFLQNCEDEDS(1)DEDDELDSVQHK											SHGLEPAAPS(1)PR												SGSLDSELSVS(1)PK											S(0.004)VS(0.991)PT(0.005)FLNPSDENLK
		KPS(0.978)GS(0.022)PDLWK													INSFS(1)PQKPPGHCSR											RNS(1)LTGEEGQLAR												GGNVFAALIQDQS(1)EEEEEEEKHPPK											VSAEAEVAPVS(0.997)PEVT(0.01)QEVVEEHCAS(0.993)PEDK
		TIS(1)NPEVVMK													AKNS(1)DLLTSPDVGLLK											DYS(0.989)PS(0.011)RNPPEVEAR												RCCS(1)PPNELGFRR											SPLLAGGS(1)PPQPVVPAHK
		AVGRLEAVSHTSDMHRGY(0.002)ADS(0.942)PS(0.056)K													MAESPCSPSGQQPPS(1)PPS(1)PDELPANVK											ELS(1)QNTDESGLNDEAIAK												RDS(1)LTGSSDLYK											SSDVSPPLGQHETGGS(1)PSK
		APGS(0.998)PRGQHEPS(0.002)KPPPAGETVTGGFGAK													IKIEHAPS(0.997)PS(0.001)S(0.001)GGT(0.001)LK											LSPLPPGS(0.979)PGS(0.021)AAR												DNPS(1)PEPQLDDIKR											KLS(0.845)LQERPAGS(0.146)Y(0.009)LEAQAGPY(0.002)AT(0.993)GPAS(0.004)HIS(0.001)PR
		ILELT(1)PEPDRPR													VSAGEPGS(0.03)HPS(0.97)PAPRRS(1)PAGNK											AGS(1)PAPSNRLNDS(0.996)PT(0.004)LK												DCDPGS(1)PRRCDIIIISGR											NMTVEQLLTGSPT(0.002)S(0.993)PT(0.004)VEPEKPTR
		RLS(1)NPCIQR													EVIDAS(1)DKEGMS(1)PAKR											AGLESGAEPGDGDS(1)DTTKK												MSCFSRPSMS(1)PTPLDR											LQDGSAYTIDWSREPLPGLTREPVAES(1)PK
		VAPVINNGS(0.999)PT(0.001)ILGK													GVEPSPS(1)PIKPGDIK											RICPVPPVS(0.005)T(0.005)VT(0.013)GDENIS(0.967)DS(0.01)EIEQYLRTPQEVR												SPPS(1)PVER											KAPSTSHSGFPPVANGPRS(0.978)PPS(0.022)LR
		LQGSGVSLAS(1)KK													SKPLAAS(1)PKPAGLK											LSSAHS(0.999)MS(0.001)DLSGSHMSSEK												SKPIPIMPAS(1)PQK											RTYS(1)LTTPAR
		TESSPSEASQHSMQS(1)PQK													LS(0.424)S(0.576)LRAS(0.191)T(0.608)S(0.201)KS(0.999)ES(0.071)S(0.929)QK											VLSNRGDS(1)LSR												RDYDDMS(1)PR											AS(0.013)T(0.016)AS(0.971)PCNNNINAATAVALQEPRK
		DFSLVRENSKET(1)FSGK													GRLVREDENDAS(1)DDEDDDEK											RRS(1)IPQPHQLLGR												FKIDSNIS(1)PKK											NREELGFRPEYSAS(1)QLK
		RS(0.999)RS(0.001)VSPCSNVES(1)R													RTCPSLSPTS(1)PLNNK											S(0.001)PQLS(0.003)LS(0.996)PRPAS(1)PK												ESEDKPEIEDVGS(1)DEEEEKK											RPTPNDDTLDEGVGLVHSNIATEHIPS(1)PAK
		AIEPQKEEADENYNS(1)VNTR													NRENS(1)PSSQSAGLSSINK											TLTRT(0.001)S(0.999)QETADVK												NHET(0.001)DGGS(0.999)AHGDDDDDGPHFEPVVPLPDKIEVK											RQSPEPS(0.052)PVT(0.948)LGRR
		NTDVAQS(1)PEAPKQEAPAK													S(0.001)GT(0.001)GS(0.99)GGS(0.005)T(0.003)PHISGPGPGRPSSK											AKPPADPAAAAS(1)PCR												S(0.046)NS(0.954)GLGGEVSGVMSK											IDGAT(0.001)QS(0.008)S(0.991)PAEPK
		RSQEDEIS(0.002)S(0.998)PVNK													SEDDSAKFDS(1)NEEDSASVFSPSFGLK											SPAPGAPT(0.003)RS(0.996)PS(0.001)TPAK												KSDGACDS(0.015)PS(0.99)S(0.995)DKENSSQIAQDHQK											APVPEPGLDLSLS(0.001)PRPDS(0.999)PQPR
		AGAGMITQHSSNAS(1)PINR													SRVS(1)VS(0.766)PGRT(0.139)S(0.093)VT(0.002)K											IGLPHS(1)IK												IDS(1)PGFKPASQQVYRK											LVTSGAESGNLNTS(1)PSSNQTR
		LLAEALNQVTQRAS(1)R													AADS(1)DDGAVSAPAASDGGVSK											ELSKEDLSPAFDHS(1)PNK												AKS(1)PTPESSTIASYVTLRK											ALEAELDAQHLSETFDNIDNLS(1)PK
		MNTAPSRPS(0.997)PT(0.003)R													EHNSMWAS(0.003)LS(0.013)S(0.985)PDAEAVEPDFSSIER											SLDGAS(1)VNENHEIYMK												GVHIHQAGGS(1)PPASSTSSSSLTNDVAK											MDRGVS(1)MPNMLEPK
		ADREVQAEQPSSSS(1)PR													LFEES(1)DDKEDEDADGKEVEDADEK											RRS(1)S(0.001)LS(0.699)PPS(0.125)S(0.175)AYER												PFKLS(1)GLS(1)FKR											RSIFAS(1)PESVTGK
		VLTANSNPS(0.001)S(0.998)PS(0.001)AAK													SRVS(1)VS(0.335)PGRT(0.673)S(0.989)VT(0.003)K											SLS(1)PGVSR												SPPTTMLLPAS(1)PAK											AFGSGIDIKPGT(1)PPIAGR
		AQTLPTSVVTITSES(0.009)S(0.991)PGKR													MTGSAPPPS(1)PTPNK											S(0.001)S(0.002)S(0.997)PT(0.001)QYGLTK												SPSGPVKS(1)PPLS(1)PVGTTPVK											GICPKS(0.996)PS(0.004)AIPEQNHSLNDQAK
		TTPPTQKPPS(1)PPMSGK													GGPLQALT(0.001)RES(0.985)T(0.014)R											SGSSFVHQAS(1)FK												SSGVVPQS(1)APPVPTASSR											KGPRT(1)PS(1)PPPPIPEDIALGK
		LTEGCS(1)FR													S(0.001)KS(0.999)NPDFLKK											ADGGS(1)PFLGRR												AQCETLS(1)PDGLPEEQPQTTK											ALS(0.988)S(0.012)AGPIPIRPPIVPVK
		KPPAPDPFARS(0.971)S(0.029)PR													TQSRPGGPPNPPGPS(1)PK											GGVTGS(1)PEASISGSK												TPT(0.005)S(0.975)S(0.019)PAS(0.913)S(0.087)PLVAK											TTSQAHSLPLS(1)PASTR
		QVAEQGGDLS(1)PAANR													ISTASQVSQGTGS(1)PVPK											DQEPKPS(1)PEPAAVSR												RNDS(0.999)IY(0.001)EASSLYGISAMDGVPFTLHPR											TEPT(0.015)S(0.983)PT(0.001)PSAFK
		THTTALAGRS(1)PS(0.999)PAS(0.001)GR													WDKDDFES(1)EEEDVK											GSFS(1)DTGLGDGK												KPENEVAQNGGAETSHTEPVS(1)PIPK											VNQSALEAVT(0.005)PS(0.966)PS(0.029)FQQR
		RPDHS(0.031)GGS(0.969)PS(1)PPTSEPAR													RNS(1)FTPLSSSNTIR											EREDSGDAEAHAFKS(0.996)PS(0.004)K												VVGGS(1)LRGAQAASPAK											VYFQS(1)PPGAAGEGPGGADDEGPVRR
		SLSNS(0.999)NPDISGT(0.971)PT(0.021)S(0.007)PDDEVR													T(0.04)T(0.04)GT(0.92)PPDSSLVTYELHSRPEQDK											T(0.002)QLS(0.996)PS(0.002)IK												SSEGGVGVGPGGGDEPPT(0.009)S(0.991)PR											NDSDLFGLGLEEAGPKES(1)S(1)EEGKEGK
		AEASSLGRQS(1)PR													VPGMRQPAQELS(1)PTPGGTAHQALK											NTDSWAPPLEIVNHRS(0.258)PS(0.742)REK												SLS(1)VEHLETK											ASIANSDGPTAGSQT(1)PPFK
		T(0.066)MIIS(0.934)PERLDPFADGGKT(1)PDPK													ET(0.003)LS(0.997)PPGNGCAIYR											GTPSQS(1)PVVGR												S(0.001)RFHS(0.178)PS(0.092)T(0.144)T(0.585)WS(1)PNK											RAS(1)ALIDRPAPYFER
		LSDDFDS(1)PVK													DITDPLSLNTCTDEGHVVLAS(1)PLK											GRPPAEKLS(1)PNPPK												TPPGALLGAPPPLVPAPRPS(0.154)S(0.846)PPRGPGPAR											T(0.08)ENGT(0.137)CPS(0.783)PPQPLS(1)PAAALGSGSAAAVPK
		ERLGGSVLGQIPFLQNCEDEDS(1)DEDDELDSVQHK													S(0.937)LS(0.062)MDS(0.001)QVPVYSPSIDLK											RQS(0.997)PS(0.004)PS(0.948)T(0.051)RPIR												HS(0.001)DS(0.001)GT(0.001)S(0.001)EAS(0.03)LS(0.965)PPS(0.542)S(0.458)PPS(0.001)RPR											VGGS(0.998)S(0.002)VDLHR
		IKIEHAPS(0.997)PS(0.001)S(0.001)GGT(0.001)LK													KAEAGAGS(0.999)AT(0.001)EFQFR											YGLQDS(1)DEEEEEHPSK												GFSQYGVSGS(1)PTK											GVVTNGLDLS(1)PADEK
		NRENS(1)PSSQSAGLSSINK													S(0.858)KS(0.142)PS(0.98)PPRLT(0.02)EDR											VQSLEGEKLS(1)PK												RS(0.935)LS(0.065)EQPVMDTATATEQAK											IISTTASKTET(1)PIVSK
		S(0.001)GT(0.001)GS(0.99)GGS(0.005)T(0.003)PHISGPGPGRPSSK													S(0.023)ET(0.977)APAAPAAPAPAEKT(1)PVKK											KNS(1)LRVEGDNIYVR												FQEQECPPS(1)PEPTRK											HQVLLEDPEQEGS(1)AEEEELGVLPCPSTSLDGENR
		SRVS(1)VS(0.766)PGRT(0.139)S(0.093)VT(0.002)K													S(0.002)RS(0.917)NS(0.08)GVRLDGY(0.001)AR											NPSDSAVHS(1)PFTK												T(0.008)T(0.01)S(0.981)IS(1)PALARK											RGT(1)S(1)PRPPEGGLGYSQLGDDDLK
		AADS(1)DDGAVSAPAASDGGVSK													EPKEPS(1)PKQDVVGK											RRS(0.01)S(0.99)LS(0.999)PPS(0.001)S(0.001)AYER												RPLPVES(1)PDTQRK											ELEIGQAGSQRAPS(1)AK
		MTGSAPPPS(1)PTPNK													AGS(1)PAPSNRLNDS(0.999)PT(0.001)LK											KPS(0.978)GS(0.022)PDLWK												EIESEIDS(1)EEELINKK											RSRPTSEGS(1)DIESTEPQK
		GGPLQALT(0.001)RES(0.985)T(0.014)R													RHS(0.999)AS(0.001)NLHALAHPAPSPGSCSPK											TIS(1)NPEVVMK												NCEEVGLFNELAS(1)PFENEFKK											AVSAGSART(0.003)S(0.996)PSSDK
		S(0.001)KS(0.999)NPDFLKK													S(0.011)AGAGS(0.989)PARPPS(1)PR											AVGRLEAVSHTSDMHRGY(0.002)ADS(0.942)PS(0.056)K												DLFSLDSEDPSPAS(1)PPLR											RPAS(1)PS(0.008)S(0.992)PEHLPATPAESPAQR
		TQSRPGGPPNPPGPS(1)PK													RS(0.005)S(0.995)LCGEEQGSPEELRQR											APGS(0.998)PRGQHEPS(0.002)KPPPAGETVTGGFGAK												MPFQT(0.05)S(0.95)PGGK											RREFITGDVEPTDAESEWHS(1)ENEEEEK
		DITDPLSLNTCTDEGHVVLAS(1)PLK													S(0.001)GHS(0.996)PT(0.004)RGAMQVAMNGK											ILELT(1)PEPDRPR												RES(1)VAS(1)GDDRAEEDMDEAIEK											NSDLLTS(1)PDVGLLK
		KAEAGAGS(0.999)AT(0.001)EFQFR													MFGGPGTASRPS(0.009)S(0.956)S(0.035)R											RLS(1)NPCIQR												VFQT(1)EAELQEVISDLQSK											VPLSNENSQVPQS(1)PEDWRK
		S(0.002)RS(0.917)NS(0.08)GVRLDGY(0.001)AR													LGSLSARS(0.014)DS(0.986)EATISR											VAPVINNGS(0.999)PT(0.001)ILGK												ATS(0.001)EEDVS(0.998)IKS(0.001)PICEK											RPQRAT(1)S(1)NVFAMFDQSQIQEFK
		EPKEPS(1)PKQDVVGK													KLGVS(1)VS(1)PSR											KQPPKEPSEVPT(1)PK												KS(0.967)ES(0.032)PFRETEPLVSPHQDK											EAHS(1)PGPLVKPFETASVK
		AGS(1)PAPSNRLNDS(0.999)PT(0.001)LK													S(0.02)GNFGGS(0.971)RNMGGPY(0.008)GGGNYGPGGS(0.001)GGSGGYGGR											TESSPSEASQHSMQS(1)PQK												RLS(1)LGQGDSTEAATEER											KVQCISHEINPSAIVDS(0.999)PVET(0.001)K
		S(0.011)AGAGS(0.989)PARPPS(1)PR													AVYIGVHVPFS(0.005)KES(0.995)R											DFSLVRENSKET(1)FSGK												SFLSEPS(0.035)S(0.035)PGRT(0.929)K											ALSSGGSITS(1)PPLSPALPK
		RS(0.005)S(0.995)LCGEEQGSPEELRQR													HSAAAAGRAPS(1)PPPPGSEAAPS(0.985)PS(0.014)K											RS(0.999)RS(0.001)VSPCSNVES(1)R												S(0.073)AES(0.927)PTS(1)PVTSETGSTFKK											RS(0.008)S(0.088)S(0.905)ETILSSLAGSDIVK
		MFGGPGTASRPS(0.009)S(0.956)S(0.035)R													AAAITDMADLEELSRLS(1)PLPPGS(0.804)PGS(0.196)AAR											AIEPQKEEADENYNS(1)VNTR												S(1)EGESQTVLSSGSDPK											STSAPQMSPGSSDNQSSS(1)PQPAQQK
		KLGVS(1)VS(1)PSR													TGADTTAAGPLFQQRPY(0.066)PS(0.934)PGAVLR											NTDVAQS(1)PEAPKQEAPAK												DMES(1)PTKLDVTLAK											GVPGCCYS(0.006)S(0.994)LPR
		AVYIGVHVPFS(0.005)KES(0.995)R													SPMSTNSSVHTGS(1)DVEQDAEK											RSQEDEIS(0.002)S(0.998)PVNK												AGLGS(0.998)PERPPKT(0.783)S(0.219)PGS(1)PR											GDQVLNFS(1)DAEDLIDDSK
		HSAAAAGRAPS(1)PPPPGSEAAPS(0.985)PS(0.014)K													RIQDPTEDAEAEDT(1)PRK											AGAGMITQHSSNAS(1)PINR												AAPWGSNPS(1)PSAESTQAMDR											VGS(1)LDNVGHLPAGGAVK
		TGADTTAAGPLFQQRPY(0.066)PS(0.934)PGAVLR													HSPIAPS(0.001)S(0.998)PS(0.001)PQVLAQK											LLAEALNQVTQRAS(1)R												RPQFS(0.033)PT(0.967)GDCQAEAAAAANGTGGEEDDGPAAELLEK											S(0.004)NS(0.996)LVSTFTMEK
		HSPIAPS(0.001)S(0.998)PS(0.001)PQVLAQK													NSS(1)PAPPQPAPGK											MNTAPSRPS(0.997)PT(0.003)R												TFPLAHS(1)PQAECEDQLDAQER									wt+EBSS+LPS wt+LPS	38	KPPAPDPFARS(0.048)S(0.952)PR
		LHS(0.01)S(0.986)S(0.004)LELGPRPLEQENER													SPPREGSQGELT(1)PANSQSR											ADEAALALQPGGS(0.97)PS(0.346)AAGADREAAS(0.342)S(0.342)PAGEPLRK												AHS(1)PVQSGLPGMQNLK											GINGGPSRMS(1)PK
		SPPREGSQGELT(1)PANSQSR													GAS(1)QAGMTGYGMPR											ADREVQAEQPSSSS(1)PR												MSCFSRPSMS(0.009)PT(0.991)PLDR											SQNPLRS(1)FK
		GAS(1)QAGMTGYGMPR													EGEEPTVYS(1)DEEEPKDESAR											VLTANSNPS(0.001)S(0.998)PS(0.001)AAK												RRS(1)LPAGDALYLSFNPPQPSR											SSSQSTFHIPLS(1)PVEVKPGNVR
		ATDIPASAS(1)PPPVAGVPFFK													ERS(1)PS(1)PLRGNVVPS(1)PLPTR											ADGDS(1)GS(1)ERGGGGGPCGFQPASR												LS(0.002)RGDS(0.997)LKEPT(0.001)SIAESSR											LQQQAALS(0.999)PT(0.001)TAPAVSSVSK
		LQSFDS(1)PERK													ATDIPASAS(1)PPPVAGVPFFK											AQTLPTSVVTITSES(0.009)S(0.991)PGKR												DYNASAST(0.004)IS(0.98)PPS(0.015)S(0.001)MEEDK											LCPSCPAS(0.005)S(0.995)PK
		VSAGEPGSHPS(1)PAPRRS(1)PAGNK													LQSFDS(1)PERK											TTPPTQKPPS(1)PPMSGK												AYS(1)PEYR											AQPS(0.001)AS(0.998)LGVGY(0.001)R
		LHPDGS(1)PDVAGEK													VSAGEPGSHPS(1)PAPRRS(1)PAGNK											LTEGCS(1)FR												AKNS(1)DLLTSPDVGLLK											GGYRQQQS(1)QTAY
		VAPPYPHLFSSCSPPGMVLDGS(1)PK													LHPDGS(1)PDVAGEK											THTTALAGRS(1)PS(0.999)PAS(0.001)GR												AQLEPVAS(1)PAKKPK											TAVAPSAVNLADPRT(0.997)PT(0.003)APAVNLAGAR
		TNTMNGS(1)KSPVISRPK													RNS(1)LTGEEGQLAR											RPDHS(0.031)GGS(0.969)PS(1)PPTSEPAR												RS(0.907)NS(0.093)APLIHGLSDTSPVFQAEAPSAR											RTCPSLSPTS(1)PLNNK
		LAEDEGDS(1)EPEAVGQSR													LDRLNTVAS(1)PK											AEASSLGRQS(1)PR												LS(0.424)S(0.576)LRAS(0.191)T(0.608)S(0.201)KS(0.999)ES(0.071)S(0.929)QK											KRELPSLSPAPDT(0.022)GLS(0.917)PS(0.061)K
		SRT(0.003)S(0.997)VQTEDDQLIAGQSAR													DYS(0.989)PS(0.011)RNPPEVEAR											T(0.066)MIIS(0.934)PERLDPFADGGKT(1)PDPK												T(0.036)T(0.164)S(0.794)PPLS(0.005)IPTTHLIHQPAGSR											S(0.937)LS(0.062)MDS(0.001)QVPVYSPSIDLK
		EDKS(1)PETGTAGGSSTASYSAGR													VAPPYPHLFSSCSPPGMVLDGS(1)PK											LSDDFDS(1)PVK												GRLVREDENDAS(1)DDEDDDEK											S(0.858)KS(0.142)PS(0.98)PPRLT(0.02)EDR
		LAEAPS(0.001)PAPT(0.01)PS(0.031)PT(0.034)PVEDLGPQT(0.237)S(0.237)T(0.237)S(0.237)PGRLS(0.977)PDFAEELR													LSPLPPGS(0.979)PGS(0.021)AAR											ERLGGSVLGQIPFLQNCEDEDS(1)DEDDELDSVQHK												GFGEYSRS(1)PTF											SWDS(0.01)S(0.045)S(0.944)PVDRPEPEAASPTTR
		ADLIPY(0.004)QDS(0.996)PEGPDHSSASSGVPNPPK													AGS(1)PAPSNRLNDS(0.996)PT(0.004)LK											IKIEHAPS(0.997)PS(0.001)S(0.001)GGT(0.001)LK												RLS(1)TSPDVIQGHQPR											AAAITDMADLEELSRLS(1)PLPPGS(0.804)PGS(0.196)AAR
		RMS(1)DEFVDSFKK													AGLESGAEPGDGDS(1)DTTKK											NRENS(1)PSSQSAGLSSINK												RRS(0.898)S(0.067)T(0.035)VAPAQPDGAESEWTDVETR											DYS(0.989)PS(0.011)RNPPEVEAR
		GRWES(1)QQDVSQTTVSR													TNTMNGS(1)KSPVISRPK											S(0.001)GT(0.001)GS(0.99)GGS(0.005)T(0.003)PHISGPGPGRPSSK												LFEES(1)DDKEDEDADGKEVEDADEK											RRS(1)IPQPHQLLGR
		GKIEVLDS(1)PASK													LSSAHS(0.999)MS(0.001)DLSGSHMSSEK											SEDDSAKFDS(1)NEEDSASVFSPSFGLK												RQS(0.996)FGGS(0.004)LFAYSPGGAHGMLSSPK											AKPPADPAAAAS(1)PCR
		TLSAS(0.991)T(0.009)QDLSPH													VLSNRGDS(1)LSR											SRVS(1)VS(0.766)PGRT(0.139)S(0.093)VT(0.002)K												GWLRDPSAS(1)PGDAGEQAIR											S(0.001)S(0.002)S(0.997)PT(0.001)QYGLTK
		EAASSSSGTQPAPPAPAS(1)PWDSKK													RRS(1)IPQPHQLLGR											AADS(1)DDGAVSAPAASDGGVSK												EGSVLDILKS(1)PGFASPK											T(0.006)NT(0.991)MNGS(0.061)KS(0.942)PVISRPK
		HYGITS(1)PISLAAPK													LAEDEGDS(1)EPEAVGQSR											EHNSMWAS(0.003)LS(0.013)S(0.985)PDAEAVEPDFSSIER												ADAPDAGAQS(0.995)DS(0.003)ELPS(0.001)Y(0.001)HQNDVSLDR											ADGGS(1)PFLGRR
		AQGVRS(1)PLLR													S(0.001)PQLS(0.003)LS(0.996)PRPAS(1)PK											MTGSAPPPS(1)PTPNK												PAETPVATS(1)PTATDSTSGDSSR											GTPSQS(1)PVVGR
wt+LPS	106	S(0.699)NS(0.301)VGIQDAFNDGSDSTFQK													TLTRT(0.001)S(0.999)QETADVK											TQSRPGGPPNPPGPS(1)PK												VKAS(0.999)PIT(0.001)NDGEDEFVPSDGLDKDEYT(0.003)FS(0.997)PGK											EGFQPRS(0.001)T(0.999)DAGV
		APPTLQAETATKPQATSAPS(1)PAPK													SPAPGAPT(0.003)RS(0.996)PS(0.001)TPAK											DITDPLSLNTCTDEGHVVLAS(1)PLK												SCEGQNPELLPKT(1)PIS(1)PLK											DFSLVRENSKET(1)FSGK
		TPAAAAAMNLAS(1)PR													IGLPHS(1)IK											KAEAGAGS(0.999)AT(0.001)EFQFR												FLSRSVEDVRPHHT(0.002)DANNQS(0.998)ACFEAPDQK											MNTAPSRPS(0.997)PT(0.003)R
		HAS(0.09)S(0.101)S(0.328)PES(0.479)PKPAPAPGS(0.996)HREIS(0.446)S(0.106)S(0.21)PT(0.129)S(0.115)K													SRT(0.003)S(0.997)VQTEDDQLIAGQSAR											EPKEPS(1)PKQDVVGK												RQVS(1)ASELHTSGILGPETLR											RFS(1)PSQVPIQTR
		TPQPSS(1)PMDQMGK													ELSKEDLSPAFDHS(1)PNK											S(0.002)RS(0.917)NS(0.08)GVRLDGY(0.001)AR												AS(0.228)ET(0.772)PPPVAQPKPEAPHPGLETTLQER											DTGKT(1)PVEPEVAIHR
		S(0.001)ES(0.999)MPVQLNK													SLDGAS(1)VNENHEIYMK											AGS(1)PAPSNRLNDS(0.999)PT(0.001)LK												ERPSSAIYPS(0.01)DS(0.979)FRQS(0.007)LLGS(0.004)R											KPPAPDPFARS(0.971)S(0.029)PR
		GAGPQLLEELDNAPGS(0.003)DAAELELAPART(0.99)PPDS(0.007)VK													EDKS(1)PETGTAGGSSTASYSAGR											S(0.011)AGAGS(0.989)PARPPS(1)PR												LRSDAGLES(1)DTAMK											QVAEQGGDLS(1)PAANR
		GFS(1)DSGGGPPAK													RRS(1)S(0.001)LS(0.699)PPS(0.125)S(0.175)AYER											RS(0.005)S(0.995)LCGEEQGSPEELRQR												LRTNREDCFES(0.028)ES(0.972)EDEFYK											GLAS(1)PTAITPVASAICGK
		IHS(1)PIPDMSK													SLS(1)PGVSR											MFGGPGTASRPS(0.009)S(0.956)S(0.035)R												S(0.076)T(0.076)S(0.848)PFGIPEEASEMLEAKPK											SLSNS(0.999)NPDISGT(0.971)PT(0.021)S(0.007)PDDEVR
		ISLPGQMAGT(1)PIT(1)PLK													ADLIPY(0.004)QDS(0.996)PEGPDHSSASSGVPNPPK											KLGVS(1)VS(1)PSR												QLVRGEPNVSY(1)ICSR											KFS(1)PSQVPVQTR
		SSSQSTFHIPLS(1)PVEVKPGNVR													S(0.001)S(0.002)S(0.997)PT(0.001)QYGLTK											AVYIGVHVPFS(0.005)KES(0.995)R												TATCHSS(0.004)S(0.004)S(0.992)PPIDAASAEPYGFR											VAAETQS(1)PSLFGSTK
		RRDEDMLYS(1)PELAQR													SRTDSLAAT(1)PPAAK											HSAAAAGRAPS(1)PPPPGSEAAPS(0.985)PS(0.014)K												MLPHAPGVQMQAIPEDAIPEES(1)GDEDEDDPDKR											SHTSLKDELSDVSQGGS(1)K
		ELSESVQQQSTPVPLIS(1)PK													RMS(1)DEFVDSFKK											HSPIAPS(0.001)S(0.998)PS(0.001)PQVLAQK												HDSIPAADTFEDLS(1)DVEGGGSEPTQR											Y(1)MS(1)QMS(1)VPEQAELEK
		LKS(1)EDELRPEVDEHTQK													GRWES(1)QQDVSQTTVSR											LHS(0.01)S(0.986)S(0.004)LELGPRPLEQENER												LKETCVSGEDPTQGADLS(1)PDEK											RVS(0.987)T(0.013)DLPEGQDVYTAACNSVIHR
		LQQQAALS(0.999)PT(0.001)TAPAVSSVSK													GKIEVLDS(1)PASK											SPPREGSQGELT(1)PANSQSR												RVALS(1)DDETK											VAPPYPHLFSSCSPPGMVLDGS(1)PK
		S(1)YGRPPPDVEGMTSLK													TLSAS(0.991)T(0.009)QDLSPH											GAS(1)QAGMTGYGMPR												HSCSPMGDGDPEAMEES(1)PRKK											LAEAPS(0.001)PAPT(0.01)PS(0.031)PT(0.034)PVEDLGPQT(0.237)S(0.237)T(0.237)S(0.237)PGRLS(0.977)PDFAEELR
		LCPSCPAS(0.005)S(0.995)PK													EAASSSSGTQPAPPAPAS(1)PWDSKK											ATDIPASAS(1)PPPVAGVPFFK												SPMSTNSSVHTGS(1)DVEQDAEK									wt-EBSS	481	EAYVNANQARVS(1)PSTSYTPSR
		VS(0.004)GRT(0.977)S(0.019)PPLLDR													HYGITS(1)PISLAAPK											LQSFDS(1)PERK												NSS(1)PAPPQPAPGK											ALS(1)PEGALRR
		KLPPPPGS(1)PLGHS(0.996)PT(0.003)AS(0.001)PPPTAR													AQGVRS(1)PLLR											VSAGEPGSHPS(1)PAPRRS(1)PAGNK												S(1)PGASNFSTLPK											SGSLDSELSVS(1)PK
		LNHVAAGLVS(1)PSLK													SGSSFVHQAS(1)FK											LHPDGS(1)PDVAGEK												GASDVGAGEPGPERAPLS(1)PGRK											VLDTSSLTQS(1)APAS(1)PTNK
		LRS(1)DPGPPTETPSQRPSPLK											wt+LPS	86	RKADTTTPTPTAILAPGS(1)PAS(0.999)PPGS(0.001)LEPK											LDRLNTVAS(1)PK												SQEPIPDDQKVS(1)DDDKEK											SHILEDDENS(1)VDISMLK
		SQLPTLEQDGGTQNPVS(0.005)S(0.994)PGMS(0.001)QELR													ANVS(0.853)S(0.147)PHREFPPATAR											VAPPYPHLFSSCSPPGMVLDGS(1)PK												VAPVINNGS(0.022)PT(0.978)ILGK											AVVS(1)PPKFVFGSESVK
		ELAQRQEEEAAQQGPVVVS(0.999)PAS(0.001)DYK													S(0.699)NS(0.301)VGIQDAFNDGSDSTFQK											TNTMNGS(1)KSPVISRPK												TSASEGNPYVSSTLSVPAS(1)PR											NAASFPLRSPQPVCS(0.997)PAGS(0.003)EGTPK
		APAS(1)PGAGSDAQGPQFGWDHSLHK													ALS(1)RQLS(0.821)S(0.178)GVS(0.001)EIR											LAEDEGDS(1)EPEAVGQSR												LSSAHS(0.999)MS(0.001)DLSGSHMSSEK											LFGAPEPS(0.013)T(0.015)IARS(0.969)LPT(0.002)T(0.001)VPES(1)PNYR
		AQPS(0.001)AS(0.998)LGVGY(0.001)R													NAS(1)VPNLRGSEER											SRT(0.003)S(0.997)VQTEDDQLIAGQSAR												ERESSANNSVS(1)PSESLR											ALIAQLPS(1)PAIDHEQLR
		GGYRQQQS(1)QTAY													HAS(0.09)S(0.101)S(0.328)PES(0.479)PKPAPAPGS(0.996)HREIS(0.446)S(0.106)S(0.21)PT(0.129)S(0.115)K											EDKS(1)PETGTAGGSSTASYSAGR												S(1)PGVAAAVAEDGGLK											VQVAALQAS(1)PPLDQDDRAFEVMDEFDGR
		TAVAPSAVNLADPRT(0.997)PT(0.003)APAVNLAGAR													SPPS(1)PVER											RMS(1)DEFVDSFKK												EPHS(1)PADQPEQQAESTLTSAETR											VVSAPVGKET(0.999)PS(0.001)K
		ANVS(0.033)S(0.967)PHREFPPATAR													GPS(1)WDPFRDWYPHSR											GRWES(1)QQDVSQTTVSR												S(1)KS(1)PPKVPIVIQDDSLPAGPPPQIR											AYQHGGVTGLS(1)QY
		T(1)PKDSPGIPPSAGAHQLFR													LNS(0.992)EAS(0.006)PS(0.002)REAINGQREDTGDQQGLLK											GKIEVLDS(1)PASK												ADGGS(1)PFLGRR											PIGPDDAIDALSSDFTCGS(0.997)PT(0.003)AAGK
		VLS(1)PTAAKPSPFEGK													TPKDS(1)PGIPPSAGAHQLFR											TLSAS(0.991)T(0.009)QDLSPH												FNLS(1)QESSYIATQYSLRPR											RAHT(0.996)PT(0.004)PGIYMGR
		ERPISLGIFPLPAGDGLLT(1)PDAQK													HSQPSPEPHS(1)PTEPPAWGSSIVK											HYGITS(1)PISLAAPK												LLDAEDVDVPS(1)PDEK											VEMGTSSQNDVDMSWIPQETLNQINKAS(1)PR
		RSINKLDS(1)PDPFK													GAGPQLLEELDNAPGS(0.003)DAAELELAPART(0.99)PPDS(0.007)VK											EAASSSSGTQPAPPAPAS(1)PWDSKK												EGS(1)PIPHDPEFGSK											SVPGTTSSPLVGDIS(1)PK
		RQSNVAAPGDAT(1)PPAEK													ELKPQKS(1)VVS(1)DLEADDVK											AQGVRS(1)PLLR												GGVTGS(1)PEASISGSK											YRIQEQES(1)S(1)GEEDSDLSPEEREK
		S(0.141)AAS(0.859)REDLVGPEVGASPQSGRK													FQS(0.001)QADQDQQAS(0.007)GLQS(0.989)PPS(0.003)RDLSPTLIDNSAAK									wt+LPS	73	S(0.699)NS(0.301)VGIQDAFNDGSDSTFQK												KVDLTLLS(1)PK											NWGAVVRS(1)PEGT(1)PQK
		RRS(1)PSPY(0.001)Y(0.001)S(0.999)R													IHS(1)PIPDMSK											GGRS(1)PDEVTLTSIVPTR												KLS(1)GDQITLPTTVDYSSVPK											FICVTPTTCSNTIDLPMS(1)PR
		GS(1)PLNAAPYGIESMSQDTEVR													NNEES(1)PTATVAEQGEDITSKK											HAS(0.09)S(0.101)S(0.328)PES(0.479)PKPAPAPGS(0.996)HREIS(0.446)S(0.106)S(0.21)PT(0.129)S(0.115)K												RGEGDAPFSEPGTTSTQRPS(0.973)S(0.024)PET(0.001)AT(0.001)K											EMEHNTVCAAGTS(1)PVGEIGEEK
		HVVS(1)PEQIATSDK													ISLPGQMAGT(1)PIT(1)PLK											SPPS(1)PVER												KGPRT(1)PS(1)PPPPIPEDIALGK											RMLESGLPEMNDPYVLS(1)PEDDDDHQK
		T(0.286)VS(0.423)GPGT(0.291)PEPRPAT(0.99)PGAS(0.002)S(0.008)VEQLRK													SFPLHS(1)PVAGVAHR											IHS(1)PIPDMSK												S(0.999)MPVDERDLQAALT(0.001)PGALTAAAAGTGTQGPR											TEIKEEEDQPSTSATQS(0.013)S(0.987)PAPGQSK
		ALRPPT(0.088)S(0.912)PGVFGALQNFK													SPSGPVKS(1)PPLS(1)PVGTTPVK											ISLPGQMAGT(1)PIT(1)PLK												YGLQDS(1)DEEEEEHPSK											IDYQGRPSGGFVISGVLS(0.998)PDT(0.002)ISSK
		AAPQS(0.975)PS(0.025)VPK													RRDEDMLYS(1)PELAQR											SPSGPVKS(1)PPLS(1)PVGTTPVK												ESEDSETQPFDTHLEAYGPCLS(1)PPR											GPQGPGGGGINVQEILTSIMGS(0.993)PNS(0.005)HPS(0.002)EELLK
		KLNS(1)PEETAFQTPK													LIIQSSNGHIT(0.006)T(0.009)T(0.985)PT(0.965)PT(0.035)QFLCPK											RRDEDMLYS(1)PELAQR												VQSLEGEKLS(1)PK											DSPSKS(0.002)S(0.998)AEAQTPEDTPNK
		RKPVLPALTINPTIAEGPS(0.899)PT(0.069)S(0.027)EGAS(0.004)EANLVDLQK													IAS(0.999)PVS(0.001)RKEPPLTPVPLK											APRS(0.001)PPVGS(0.984)GPAS(0.015)GVEPTSFPVESEAR												RDS(1)FDNCSLGESSK											APTTVEDRVGDS(0.002)T(0.997)PVS(0.001)EK
		TQFEDLVPS(0.995)PT(0.005)SEK													AAGGATAGS(0.001)RQPS(0.097)VET(0.894)LDS(0.008)PTGSHVEWCK											ELSESVQQQSTPVPLIS(1)PK												S(0.006)AS(0.993)LS(0.001)NLHSLDR											AAGDTTVIENSDVS(1)PETESSEK
		RMS(1)GEPIQTVESIRVPGK													QLS(1)SGVSEIR											LKS(1)EDELRPEVDEHTQK												AT(0.001)LPS(0.999)PDKLPGFK											KPPAPPS(0.999)PVQS(0.47)QS(0.47)PS(0.028)T(0.035)NWS(0.999)PAVPVK
		EIS(0.082)S(0.918)PARPCSFEEAMK													VKT(1)PEMIIQKPK											SLS(1)GSSPCPK												AFS(1)QVQCLDDNHVNWR											SPVPKS(1)PVEEAK
		AVPMAPAPAS(0.997)PGS(0.002)SNDSSAR													T(0.004)QLS(0.021)QGRS(0.976)S(0.999)PQLDPLRK											S(1)YGRPPPDVEGMTSLK												SPS(1)PGLFR											S(1)LEQDALRAQMVLSR
		GHTDTEGRPPS(1)PPPT(0.913)S(0.028)T(0.059)PEK													ELSESVQQQSTPVPLIS(1)PK											RS(0.935)LS(0.065)EQPVMDTATATEQAK												EKGS(1)FSDTGLGDGK											GGPEGVAAQAVASAASAGPADAEMEEIFDDAS(1)PGK
		KPTGSLPS(0.999)PS(0.001)GVRK													TLS(1)SSAQEDIIR											LCPSCPAS(0.005)S(0.995)PK												S(0.612)FGS(0.384)PNRAYT(0.004)HQVVT(1)R											TPVSGSLKS(1)PVPR
		RLS(0.996)S(0.003)ASTGKPPLSVEDDFEK													RS(0.935)LS(0.065)EQPVMDTATATEQAK											VS(0.004)GRT(0.977)S(0.019)PPLLDR												AHLPLGQS(0.846)NS(0.133)CGS(0.021)VLPPSLAAMAK											T(0.011)VGT(0.989)PIASVPGSTNTGTVPGSEK
		AAESLTAIPEPAS(0.999)PQLLETPIHASQIQK													MPT(0.067)QS(0.932)EEEKLS(0.002)PS(0.251)PT(0.407)T(0.341)EDPRVR											NCEEVGLFNELAS(1)PFENEFKK												ANSWQLVET(1)PEK											AVSETPAVPPVS(1)EDEDDDDDDATPPPVIAPRPEHTK
		S(0.001)T(0.001)AQQELDGKPAS(0.014)PT(0.984)PVIVASHTANKEEK													LCPSCPAS(0.005)S(0.995)PK											S(0.073)AES(0.927)PTS(1)PVTSETGSTFKK												EQNSALPTS(0.009)S(0.991)QDEELMEVVEK											S(1)FEDLTDHPVTR
		ITRKPVTVSPT(0.41)T(0.59)PTS(0.999)PT(0.001)EGEAS													VS(0.004)GRT(0.977)S(0.019)PPLLDR											DMES(1)PTKLDVTLAK												STLES(0.001)EKPGS(0.999)PEAAETSPPSNIIDHCEK											ELS(1)PAGSISK
		LQTTDNLLPMS(1)PEEFDEVSR													KLPPPPGS(1)PLGHS(0.996)PT(0.003)AS(0.001)PPPTAR											SQLPTLEQDGGTQNPVS(0.005)S(0.994)PGMS(0.001)QELR												AEESRKPS(0.003)APS(0.997)PPDQTPEEDLVIVK											ALQLSNS(1)PGASSAFLK
		LLQTTNNS(1)PMNSKPQQIK													NCEEVGLFNELAS(1)PFENEFKK											ELAQRQEEEAAQQGPVVVS(0.999)PAS(0.001)DYK												LS(0.007)QS(0.007)S(0.021)QDS(0.107)S(0.856)PVRNLQS(0.002)FGTEEPAYSTRR											S(0.001)GEIPS(0.001)EQHPGAS(0.025)AS(0.959)PPCAS(0.014)PPVSAPASWDFGVPQR
		AFS(0.936)S(0.064)PQEEEEAGFTGR													AAAS(0.006)VT(0.974)PPGS(0.021)LELLQPGFSK											APAS(1)PGAGSDAQGPQFGWDHSLHK												KQPPVS(1)PGTALVGSQK											RSS(1)QPS(0.579)PT(0.421)AVPASDSPPTK
		RKADTTTPTPTAILAPGS(1)PAS(0.999)PPGS(0.001)LEPK													RFS(1)PSQVPIQTR											TAVAPSAVNLADPRT(0.997)PT(0.003)APAVNLAGAR												AS(0.158)QS(0.842)RPNS(0.864)S(0.135)ALET(0.001)LGGEK											DNEEREQSSDLTPSGDVS(1)PVK
		NSDLLT(1)SPDVGLLK													DKFS(1)PFPVQDRPESSLVFK											T(1)PKDSPGIPPSAGAHQLFR												VTGTEGSSSTLVDYTSTSSTGGS(1)PVRK											NGDECAYHHPIS(1)PCK
		ANVS(0.853)S(0.147)PHREFPPATAR													LRS(1)DPGPPTETPSQRPSPLK											VLS(1)PTAAKPSPFEGK												NLEQILNGGES(1)PKQK											TPASTPVS(0.001)GT(0.999)PQAS(1)PMIER
		NAS(1)VPNLRGSEER													S(0.073)AES(0.927)PTS(1)PVTSETGSTFKK											S(0.141)AAS(0.859)REDLVGPEVGASPQSGRK												NAS(1)AS(1)FQELEDKK											RALLSLRS(1)PK
		TAESQT(1)PTPSATSFFSGK													EVTPILAQTQSSGPQTSTTPQVLS(0.948)PT(0.038)IT(0.011)S(0.003)PPNALPR											RRS(1)PSPY(0.001)Y(0.001)S(0.999)R												LFDVCGS(1)QDFESDLDRLK											VILERDTQRGEPEGGS(1)QDQK
		GPS(1)WDPFRDWYPHSR													APVHFVEPLS(0.998)PT(0.002)GVAGHRK											HVVS(1)PEQIATSDK												KQPPKEPSEVPT(1)PK											S(0.01)S(0.99)PPEGKLETK
		KKPGDASSLPDAGLS(0.996)PGS(0.004)QVDSK													DMES(1)PTKLDVTLAK											T(0.286)VS(0.423)GPGT(0.291)PEPRPAT(0.99)PGAS(0.002)S(0.008)VEQLRK												EASRPPEEPSAPS(1)PTLPAQFK											SEHTAPPPEEPTDKS(1)PEAEDPLGVER
		LNS(0.992)EAS(0.006)PS(0.002)REAINGQREDTGDQQGLLK													KAGLAS(1)PEEEDAVGKEPLK											ALRPPT(0.088)S(0.912)PGVFGALQNFK												HVS(1)PVT(1)PPREVPIYANR											KQPPVSPGT(0.005)ALVGS(0.995)QKEPSEVPTPK
		TPKDS(1)PGIPPSAGAHQLFR													IPSFFPSPEEPPS(1)PSAPSIAK											AAPQS(0.975)PS(0.025)VPK												KNQKPSQVNGAPGS(1)PTEPAGQK											IGQQVDREPGDVAT(1)PPRK
		HSQPSPEPHS(1)PTEPPAWGSSIVK													S(0.002)GRS(0.996)PT(0.001)GNTPPVIDSVSEK											KLNS(1)PEETAFQTPK												SLVESVSS(0.061)S(0.939)PNK											TAPRQEAIPDLEDS(1)PPVS(0.865)DS(0.134)EEQQES(0.002)AR
		ELKPQKS(1)VVS(1)DLEADDVK													AGT(0.001)GYAS(0.999)PDRTHVLAAGK											RKPVLPALTINPTIAEGPS(0.899)PT(0.069)S(0.027)EGAS(0.004)EANLVDLQK												S(1)QEMVHLVNK											GVHIHQAGGS(1)PPASSTSSSSLTNDVAK
		NNEES(1)PTATVAEQGEDITSKK													ELAQRQEEEAAQQGPVVVS(0.999)PAS(0.001)DYK											RMS(1)GEPIQTVESIRVPGK												AAPPPPALT(1)PDSQTVDSSCK											SPPREGS(1)QGELTPANSQSR
		VAS(0.003)S(0.997)PVMVSNPATR													APAS(1)PGAGSDAQGPQFGWDHSLHK											EIS(0.082)S(0.918)PARPCSFEEAMK												ES(0.994)KEEET(0.005)S(0.001)IDVAGKPNEVTK											KAPAGQEEPGT(1)PPS(0.889)S(0.111)PLSAEQLDR
		EAPAEGEAAEPGS(1)PTAAEGEAASAASSTSSPK													VAAETQS(1)PSLFGSTK											AVPMAPAPAS(0.997)PGS(0.002)SNDSSAR												IS(0.026)S(0.973)KS(0.001)PGHMVILDQTK											LDRAS(1)PDLWPEQLPGVAEFAASFK
		IAS(0.999)PVS(0.001)RKEPPLTPVPLK													LDNARQS(1)AERNSNLVGAAHEELQQSR											GHTDTEGRPPS(1)PPPT(0.913)S(0.028)T(0.059)PEK												RNLLEDDS(1)DEEEDFFLRGPSGPR											EINAREESLVEELS(1)PASEK
		QLS(1)SGVSEIR													TAVAPSAVNLADPRT(0.997)PT(0.003)APAVNLAGAR											AAESLTAIPEPAS(0.999)PQLLETPIHASQIQK												MDLFGDLPEPERS(1)PRPAAGK											ILDPNTGEPAPVLS(0.03)S(0.969)PPPADVSTFLAFPSPEK
		VKT(1)PEMIIQKPK													TGHILHPEYLQPLPSTPVS(1)PIELDAK											RLS(0.996)S(0.003)ASTGKPPLSVEDDFEK												LDLLGNLPGS(1)K											ITKPGSIDSNNQLFAPGGRLS(1)WGK
		RSLS(1)EQPVMDTATATEQAK													CALS(0.007)S(0.991)PS(0.001)LAFTPPIK											ITRKPVTVSPT(0.41)T(0.59)PTS(0.999)PT(0.001)EGEAS												SEPVKEES(0.977)S(0.023)ELEQPFAQDTSSVGPDRK											S(0.002)LS(0.998)PGKENVSALDMEK
		T(0.004)QLS(0.021)QGRS(0.976)S(0.999)PQLDPLRK													T(1)PKDSPGIPPSAGAHQLFR											LQTTDNLLPMS(1)PEEFDEVSR												VVKPKS(1)PEPEATLTFPFLDK											ISYIPDEEVSSPS(1)PPQR
		RAS(1)GQAFELILS(1)PR													VLS(1)PTAAKPSPFEGK											S(1)KS(1)PPKVPIVIQDDSLPAGPPPQIR												TLS(1)SSAQEDIIR											S(1)LPEEDVAEIQHAEEFLIKPESK
		S(0.001)LLNART(0.999)PENHENLFLQPPK													SWDS(0.01)S(0.045)S(0.944)PVDRPEPEAASPTTR											LLQTTNNS(1)PMNSKPQQIK												VQDT(0.004)S(0.994)NT(0.002)GLGEDIIHQLSK											T(0.035)GEPS(0.965)PPHDILHEPPDVVS(1)DDEK
		RFS(1)PSQVPIQTR													VGAGAGAAPFREVDEIS(1)PEDDQRANR											RKADTTTPTPTAILAPGS(1)PAS(0.999)PPGS(0.001)LEPK												ADEAALALQPGGS(0.97)PS(0.346)AAGADREAAS(0.342)S(0.342)PAGEPLRK											TTQSMQDFPVVDS(1)EEEAEEEFQK
		DTGKT(1)PVEPEVAIHR													S(1)GEGEVSGLMRK											NAS(1)VPNLRGSEER												TFLEGDWTS(0.999)PS(0.001)K											RPLS(1)GPDVGTPQPAGLASGAK
		DKFS(1)PFPVQDRPESSLVFK													ERPISLGIFPLPAGDGLLT(1)PDAQK											TAESQT(1)PTPSATSFFSGK												NALPPVLTTVNGQS(1)PPEHSAPAK											AIGGIILT(0.973)AS(0.027)HNPGGPNGDFGIK
		RTFS(1)EPGDHPGMLTSGK													RQSNVAAPGDAT(1)PPAEK											LNS(0.992)EAS(0.006)PS(0.002)REAINGQREDTGDQQGLLK												S(1)HDNVYSLGGLEGRK											IPGTPGAGGRLS(1)PENNQVLTK
		EVTPILAQTQSSGPQTSTTPQVLS(0.948)PT(0.038)IT(0.011)S(0.003)PPNALPR													S(0.141)AAS(0.859)REDLVGPEVGASPQSGRK											TPKDS(1)PGIPPSAGAHQLFR												AFTGREFDELNPS(1)AQR											FGQAATMEGIGAIGGT(1)PPAFNR
		APVHFVEPLS(0.998)PT(0.002)GVAGHRK													RVS(0.987)T(0.013)DLPEGQDVYTAACNSVIHR											HSQPSPEPHS(1)PTEPPAWGSSIVK												FSKEEPVS(1)S(1)GPEEAVGK											HS(0.003)VT(0.004)AAT(0.99)PPPS(0.45)PT(0.449)S(0.103)GES(0.001)GDLLSNLLQSPSSAK
		GLAS(1)PTAITPVASAICGK													KTPLALAGS(1)PTPK											ELKPQKS(1)VVS(1)DLEADDVK												ADGDS(1)GS(1)ERGGGGGPCGFQPASR											RS(0.742)PQQT(0.258)VPYVVPLS(1)PKLPK
		KAGLAS(1)PEEEDAVGKEPLK													RRS(1)PSPY(0.001)Y(0.001)S(0.999)R											AQS(1)LLSTDREASIDILHSIVK												AQT(1)PPGPSLSGS(0.062)KS(0.938)PCPQEK											HVTLPS(0.862)S(0.137)PR
		IPSFFPSPEEPPS(1)PSAPSIAK													AS(0.002)CAS(0.998)IDIEDATQHLRDILK											VAS(0.003)S(0.997)PVMVSNPATR												AMLDSGIYPPGS(1)PGK											AQCETLS(1)PDGLPEEQPQTTK
		KFS(1)PSQVPVQTR													HVVS(1)PEQIATSDK											EAPAEGEAAEPGS(1)PTAAEGEAASAASSTSSPK												RRQS(1)VGDFVSGALNK											RPYTGNPQYTYNNWS(1)PPVQSNETSNGYFLER
		TITLVKS(1)PISVPGGSALISNLGK													VVES(1)PDFSKDEDYLGK											IAS(0.999)PVS(0.001)RKEPPLTPVPLK												KLS(1)LPTDLKPDLDVK											HAS(1)PILPITEFSDIPR
		AGT(0.001)GYAS(0.999)PDRTHVLAAGK													ALRPPT(0.088)S(0.912)PGVFGALQNFK											VKT(1)PEMIIQKPK												YNLDAS(1)EEEDSNKK											AAAAAAAGDS(1)DSWDADAFSVEDPVRK
		LIIQSSNGHIT(0.035)T(0.035)T(0.93)PT(0.994)PT(0.006)QFLCPK													ESVPEFPLS(1)PPKK											QLS(1)SGVSEIR												IKPVT(0.002)ENLVLS(0.003)S(0.006)HT(0.012)GFCQS(0.982)S(0.989)GDEALS(0.007)K											SPS(1)GSAFGSQENLR
		VAAETQS(1)PSLFGSTK													AAPQS(0.975)PS(0.025)VPK											T(0.004)QLS(0.021)QGRS(0.976)S(0.999)PQLDPLRK												S(0.997)FS(0.003)EDVISHK											IQIAPDS(1)GGLPER
		GAAAAATGQPGTAPAGT(1)PGAPPLAGMAIVK													AADRLPNLS(0.906)S(0.093)PS(0.002)AEGPPGPPSGPAPR											RAS(1)GQAFELILS(1)PR												KLGDVS(0.063)PT(0.937)QIDVSQFGSFK											RNDS(0.999)IY(0.001)EASSLYGISAMDGVPFTLHPR
		AIPVS(0.986)PS(0.014)AVEEDEDEDGHTVVATAR													KLNS(1)PEETAFQTPK											TLS(1)SSAQEDIIR												DMS(1)PLSETEMALGK											MSPNETLFLES(0.001)T(0.999)NK
		TGHILHPEYLQPLPSTPVS(1)PIELDAK													RKPVLPALTINPTIAEGPS(0.899)PT(0.069)S(0.027)EGAS(0.004)EANLVDLQK											RFS(1)PSQVPIQTR												RSVQEGENPDDGVRGS(1)PPEDYR											PQDGDVIAPLIT(1)PQKK
		CALS(0.007)S(0.991)PS(0.001)LAFTPPIK													RMS(1)GEPIQTVESIRVPGK											DKFS(1)PFPVQDRPESSLVFK												MRIPNYQLS(1)PTKLPSINK											EAENPEGEEKEAAT(1)LEVERPLPMEVEK
		S(1)GEGEVSGLMRK													EIS(0.082)S(0.918)PARPCSFEEAMK											GLAS(1)PTAITPVASAICGK												AAAAPDSRVS(1)EEENLK											IGEGT(1)Y(1)GVVYK
		RNS(1)VERPAEPVAGAATPSLVEQQK													ETPHS(1)PGVEDAPIAK											KAGLAS(1)PEEEDAVGKEPLK												VTKNEEPS(1)EEEIDAPKPK											SNIS(1)PNFNFMGQLLDFER
		RVS(0.987)T(0.013)DLPEGQDVYTAACNSVIHR													AVPMAPAPAS(0.997)PGS(0.002)SNDSSAR											IPSFFPSPEEPPS(1)PSAPSIAK												RSQANGAGALS(0.001)YVS(0.999)PNTSK											IKEEPVS(1)EEGEEDEEQEAEEEPMDTSPSGLHSK
		KTPLALAGS(1)PTPK													KPTGSLPS(0.999)PS(0.001)GVRK											S(0.002)GRS(0.996)PT(0.001)GNTPPVIDSVSEK												HS(0.003)T(0.997)PS(0.214)PT(0.479)RY(0.029)S(0.192)LS(0.061)PS(0.025)K											KPS(1)PAQAAETPALELPLPSVPAPAPL
		LAS(1)PELER													AFS(0.003)S(0.997)PQEEEEAGFTGR											AGT(0.001)GYAS(0.999)PDRTHVLAAGK												RKHS(1)EEAEFTPPLK											SPSPSSPAAVNHHSSS(0.006)DIS(0.988)PVS(0.003)NES(0.001)T(0.001)S(0.001)S(0.001)SPGK
		AS(0.002)CAS(0.998)IDIEDATQHLRDILK													RLS(0.996)S(0.003)ASTGKPPLSVEDDFEK											LDNARQS(1)AERNSNLVGAAHEELQQSR												EDILENEDEQNS(1)PPKK											AAAMVPGRSES(1)WER
		ESVPEFPLS(1)PPKK													ITRKPVTVSPT(0.41)T(0.59)PTS(0.999)PT(0.001)EGEAS											CALS(0.007)S(0.991)PS(0.001)LAFTPPIK												KPRPS(1)EGDEDCLPASK											PLHELIMQLLEET(1)PEEK
		ETPHS(1)PGVEDAPIAK													S(0.001)T(0.001)AQQELDGKPAS(0.014)PT(0.984)PVIVASHTANKEEK											TGHILHPEYLQPLPSTPVS(1)PIELDAK												NQLNKETDPVKS(1)PPLPEHQK											PFPAVS(1)PEPR
		AFS(0.003)S(0.997)PQEEEEAGFTGR													MNS(0.998)S(0.001)FSVKPFEK											VGAGAGAAPFREVDEIS(1)PEDDQRANR												S(0.004)KS(0.996)DATASISLSSNLK											QQPPEPEWIGDGEST(0.001)S(0.998)PSDK
		MNS(0.998)S(0.001)FSVKPFEK													S(1)KS(1)PPKVPIVIQDDSLPAGPPPQIR											S(1)GEGEVSGLMRK												VKPET(1)PPRQS(0.056)HS(0.354)GS(0.575)IS(0.015)PYPK											SAMDSPVPASMFAPEPS(0.01)S(0.99)PGAAR
		VKRS(1)PDEALPGGLSGCSSGSGHSPYALER													RQMS(1)VPGIFNPHEIPEEMCD											ESVPEFPLS(1)PPKK												S(0.002)GRS(0.996)PT(0.001)GNTPPVIDSVSEK											S(0.114)GS(0.886)PKLDPSEVYLK
		RQMS(1)VPGIFNPHEIPEEMCD													LLQTTNNS(1)PMNSKPQQIK											MNS(0.998)S(0.001)FSVKPFEK												S(1)PLHIKDDVLPK											GQSTGKGPPQS(1)PVFEGVYNNSR
C70A	182	SGSLDSELSVS(1)PK											P-mut	34	DFNRT(0.002)PGS(0.997)RQAS(0.915)PT(0.085)EVVER									P-mim	51	SHILEDDENS(1)VDISMLK												GAEAFGDS(1)EEDGEDVFEVEK											ATVT(1)PS(1)PVK
		GGNVFAALIQDQS(1)EEEEEEEKHPPK													LENVSQLSLDKS(1)PTEK											AECTARLPEASQS(1)PLVLK												KSPVGKS(1)PPSTGSTYGSSQK											SLSGS(1)PLK
		RCCS(1)PPNELGFRR													VILERDTQRGEPEGGS(1)QDQK											ATLSSTSGLDLMSESGEGEIS(0.997)PQREVS(0.003)R												SKGESDDFHMDFDS(1)AVAPR											LTWHS(1)CPEDEAQ
		NAASFPLRSPQPVCS(0.997)PAGS(0.003)EGTPK													S(0.5)PS(0.5)PPLPTHIPPEPPRT(1)PPFPAK											S(1)LEQDALRAQMVLSR												GMGPGT(1)PAGYGR											S(1)REDLSAQPVQTK
		RDS(1)LTGSSDLYK													ILDPNTGEPAPVLS(0.03)S(0.969)PPPADVSTFLAFPSPEK											IGQQVDREPGDVAT(1)PPRK												ELEIGQAGSQRAPS(1)AK											LIS(0.997)S(0.003)S(0.001)QVDQETGFNRHEAK
		DNPS(1)PEPQLDDIKR													ALENGDADEPS(1)FS(1)DPEDFVDDVSEEELLGDVLK											IPGTPGAGGRLS(1)PENNQVLTK												AFLAELEQNS(1)PK											GKLS(1)AEENPDDSEVPSSSGINSTK
		AECTARLPEASQS(1)PLVLK													HVTLPS(0.862)S(0.137)PR											TPPSTTVGS(0.001)HS(0.995)PPET(0.003)PVLT(0.001)R												LDNARQS(1)AERNSNLVGAAHEELQQSR											S(0.003)S(0.003)HYGGS(0.993)LPNVNQIGSGLAEFQSPLHSPLDSSR
		DCDPGS(1)PRRCDIIIISGR													RS(0.019)PS(0.975)AS(0.004)S(0.002)LSSMSSVASSVSSRPSR											LGPGRPLPTFPTSECT(0.006)S(0.994)DVEPDTR												T(0.067)QT(0.933)PPVS(0.001)PAPQPTEERLPSSPVYEDAASFK											EKEPGEQASVPLS(1)PKK
		RDYDDMS(1)PR													NSSTPGLQVPVS(0.98)PT(0.02)VPIQNQK											QQPPEPEWIGDGEST(0.001)S(0.998)PSDK												FLPLNIRNS(1)PFTR											EIESEIDS(1)EEELINKK
		LSPPY(0.001)S(0.982)S(0.017)PQEFAQDVGR													ASVVDPSTESSPAPQEGSEQPAS(0.015)PAS(0.971)PLS(0.007)S(0.007)R											MVEPENAVTIT(0.001)PLRPEDDY(0.021)S(0.978)PRER												SEDDSAKFDS(1)NEEDSASVFSPSFGLK											HSEEAEFT(1)PPLKCS(1)PK
		ESEDKPEIEDVGS(1)DEEEEKK													RMS(1)PKPELTEEQK											ESEEGNPVRGSEEDS(1)PKK												AALGHLAGEAAAAPGPGT(1)PCASR											RTS(1)PQVLGSILK
		NHET(0.001)DGGS(0.999)AHGDDDDDGPHFEPVVPLPDKIEVK													S(0.887)PS(0.113)PPLPT(0.05)HIPPEPPRT(0.95)PPFPAK											VAS(0.001)GVLS(0.999)PPPAAPPPSSSSVPEAGGPPIKK												EHNSMWAS(0.003)LS(0.013)S(0.985)PDAEAVEPDFSSIER											KS(1)PLIESTANMDNNQSQK
		HGSGPNIILTGDS(0.004)S(0.996)PGFSK													INPYMS(0.007)S(0.993)PCHIEMILTEK											GT(0.01)EAPAVVT(0.99)EEEDDDEETAPPVIAPRPDHTK												S(0.102)VS(0.882)T(0.016)T(0.001)NIAGHFNDESPLGLRR											AAAVAAAGAGEPQS(1)PDELLPK
		KSDGACDS(0.015)PS(0.99)S(0.995)DKENSSQIAQDHQK													AKADS(1)PVNGLPK											DSSFTEVPRS(1)PK												TMFAQVES(1)DDEEAKNEPEWKK											DLFSLDSEDPSPAS(1)PPLR
		IDS(1)PGFKPASQQVYRK													RGPGMGVHVPAT(0.001)PQGS(0.999)PMK											MPDEPEEPVVAVS(0.059)S(0.941)PAVPPPTK												SAVRPAS(1)LNLNR											PFSAPKPQTS(1)PSPK
		GVHIHQAGGS(1)PPASSTSSSSLTNDVAK													ACTGLSGPGSGSKS(0.999)PPATR											NDS(1)PTQIPVSSDVCR												NRADHRS(0.987)S(0.013)PNVANQPPS(1)PGGK											HTTFEQPVFSVS(0.001)KQS(0.998)PPISTSK
		SPPTTMLLPAS(1)PAK													TRT(0.003)DS(0.026)T(0.923)S(0.048)DGRPAWMR											VIS(0.002)HDRDS(0.998)PPPPPPPPPPPQPQPSLK												NSDLLTS(1)PDVGLLK											RS(0.001)RLT(0.999)PVS(0.999)PES(0.001)SSTEEK
		ILDPNTGEPAPVLS(0.03)S(0.969)PPPADVSTFLAFPSPEK													RRS(1)PSPTPTPGPS(1)R											VLST(0.008)S(0.987)T(0.005)DLEAAVADALK												GNDPLTSS(1)PGR											NKPRS(1)PVVELSK
		AQCETLS(1)PDGLPEEQPQTTK													PAAPPRPLDRES(1)PGVENK											YLFNQLFGEEDADQEVS(1)PDRADPEAAWEPTEAEAR												ENLQPQSSGVQGQVPIS(1)PEPLQRPEMLK											VQS(1)PEPPAPER
		SALPVS(0.001)PS(0.002)IS(0.001)S(0.002)APVPVEIENLPQS(0.989)PGT(0.005)DQHDRK													LRTNLQPLESTQS(1)QDF											T(0.011)RT(0.011)DS(0.934)Y(0.002)S(0.04)AGQS(0.001)VEILDGVELGEPAHK												TSQPPVPQGEAEEDS(1)QGK											S(0.003)PRIT(0.997)PPAAKPGS(1)PQAK
		EVSSLEGS(1)PPPCLGQEEAVCTK													HSHSHS(0.996)PMS(0.002)T(0.002)R											RPAEAT(0.996)S(0.007)S(0.025)PT(0.279)S(0.693)PERPR												VGAGAGAAPFREVDEIS(1)PEDDQRANR											VPRLPATAAEPEAAVIS(1)NGEH
		TPT(0.005)S(0.975)S(0.019)PAS(0.913)S(0.087)PLVAK													IEEVLSPEGSPSKS(1)PSK											S(1)RIEQGIVDR												ARLGEAS(1)DSELADADK											ILCKS(1)PQSDPADT(0.877)PT(0.12)NT(0.003)K
		RNDS(0.999)IY(0.001)EASSLYGISAMDGVPFTLHPR													GS(0.001)VPLS(0.047)S(0.9)S(0.04)PPAT(0.012)HFPDETEITNPVPKK											RGS(0.999)PTTGFIEQK												NAASFPLRS(1)PQPVCSPAGSEGTPK											LQAALDDEEAGGRPAMEPGNGS(1)LDLGGDSAGR
		KPENEVAQNGGAETSHTEPVS(1)PIPK													S(1)GDETPGSEVPGDK											NREELGFRPEYSAS(1)QLK												S(0.77)GS(0.23)DAGEARPPTPASPR											AAALQALQAQAPT(0.001)S(0.999)PPPPPPPLK
		SSEGGVGVGPGGGDEPPT(0.009)S(0.991)PR													RES(1)PPIRAFEGAITK											ALAAVPSAGSVQRVPS(1)GAAGGK												ALEAASLS(0.001)QHPPS(0.003)LCIS(0.997)DS(1)EEEEEERK											AALLAQYADVT(1)DEEDEADEK
		VVGGS(1)LRGAQAASPAK													VIHDNFGIVEGLMTTVHAIT(0.001)AT(0.999)QK											RQS(0.998)S(0.001)S(0.001)YDDPWK												TPSPKEEDEEPES(1)PPEKK											NSPLDCGSAS(1)PNK
		TPPSTTVGS(0.001)HS(0.995)PPET(0.003)PVLT(0.001)R													S(0.156)PS(0.844)PPLPT(0.065)HIPPEPPRT(0.936)PPFPAK											IDGAT(0.001)QS(0.008)S(0.991)PAEPK												SETAPLAPT(1)IPAPAEKTPVKK											VPLAPITDPQQLQLS(1)PLK
		TPPGALLGAPPPLVPAPRPS(0.154)S(0.846)PPRGPGPAR													AAGGAT(0.001)AGS(0.006)RQPS(0.991)VET(0.002)LDSPTGSHVEWCK											HFPLDLRT(0.01)S(0.99)MDGK												PQSPVIQAAAVS(1)PK											T(1)PKT(0.999)PKGPSS(0.001)VEDIK
		S(0.001)RFHS(0.178)PS(0.092)T(0.144)T(0.585)WS(1)PNK													LSMEDS(0.994)KS(0.006)PPPK											MDRGVS(1)MPNMLEPK												SRPFTVAASFQSTSVKS(1)PK											YQDEVFGGFVTEPQEES(1)EEEVEEPEER
		GFSQYGVSGS(1)PTK													AS(0.018)PS(0.018)CS(0.947)S(0.016)PTRDSSGVPVSK											VGDGDLS(1)AEEIPENEVSLRR												AAAT(1)PESQEPQAK											T(0.888)VGT(0.109)PIAS(0.001)VPGSTNTGTVPGSEKDSDSMETEEK
		ASLVALPEQTASEEET(1)PPPLLTK													WLEEADSSS(0.001)GS(0.998)PTSIDK											SVAAEGALLPQTPPS(1)PR												QILIACS(1)PVSSVR											S(1)EGESQTVLSSGSDPK
		S(0.039)LS(0.912)S(0.049)PTDNLELSLR													QEAKPQQAAGMLS(1)PK											KKS(1)PNELVDDLFK												DLLHPS(1)PEEEK											RSPDEALPGGLSGCSSGSGHS(1)PYALER
		GQSTGKGPPQS(1)PVFEGVYNNSR													TAEGDVGDY(0.002)RCPQDQS(0.997)PDRVGT(0.001)EMEQVSK											ATAPQTQHVS(1)PMRQVEPPAK												S(0.136)IS(0.852)S(0.012)PSVSSETMDKPVDLSTRK											KGAKLT(1)PEEEEILNK
		FQEQECPPS(1)PEPTRK													LEEPPELNRQS(1)PNPRR											RPDDVPLSLS(1)PSK												VGHMS(0.798)S(0.202)VELDDELLDPDMDPPHPFPK											NAIS(1)LPQLNQAAYDSLVVGK
		T(0.008)T(0.01)S(0.981)IS(1)PALARK											P-mut+LPS	81	LSSQIS(1)AGEEK											AVPIAVADEGES(1)ES(1)EDDDLKPR												HWVAPGGPYSAETPGVPS(1)PIAALK											LHQLS(1)GS(0.999)DQLES(0.001)TAHSR
		RPLPVES(1)PDTQRK													DRLGS(1)PLAVDEALRR											GY(0.007)T(0.01)S(0.983)DDDTWEPEIHLEDCK												S(0.003)KS(0.997)CHDLSVL											SDKS(1)PDLAPTPAPQSTPR
		DLFSLDSEDPSPAS(1)PPLR													LGS(1)PDYGNSALLSLPGYRPTTR											RMSSEGPPRMS(1)PK												EIAIVHS(1)DAEKEQEEEEQKQEMEVK											RPGTQGHLGPEKEEEES(0.998)DGEPEDSSTS
		AAAVAAAGAGEPQS(1)PDELLPK													EHAPLAS(1)PVENK											GVESSDVHPAPTVQQMS(0.84)S(0.16)PKPAEER												LDRLNTVAS(1)PK											S(1)GEDEQQEQTIAEDLVVTK
		RES(1)VAS(1)GDDRAEEDMDEAIEK													LS(0.001)ESQLSFRRS(0.998)PT(0.001)K											EAVREGRPPEPT(1)PAK												QQSHFAMMHGGTGFAGIDS(0.042)S(0.034)S(0.923)PEVK											GKLEAIIT(1)PPPAKK
		ATS(0.001)EEDVS(0.998)IKS(0.001)PICEK													S(1)QEEPKDTFEHDPSESIDEFNK											ASVVDPSTESSPAPQEGSEQPAS(0.015)PAS(0.971)PLS(0.007)S(0.007)R												RLGGLRPESPES(0.004)LT(0.009)S(0.971)VS(0.016)R											NLIDSMDQSAFAGFS(1)FVNPK
		KS(0.967)ES(0.032)PFRETEPLVSPHQDK													ENPPVEDS(1)S(1)DEDDKRNQGNLYDK											RKS(1)ELEFETLK												RS(0.016)NS(0.984)APLIHGLSDTSPVFQAEAPSAR											SLQYGAEETPLAGS(1)YGAADSFPK
		SFLSEPS(0.035)S(0.035)PGRT(0.929)K													S(0.274)GKQGS(0.726)PDQVS(1)PVSEMTSTSLYQDK											AKADS(1)PVNGLPK												TAFDEAIAELDTLS(1)EESYK											SYIGSNHSSLGS(0.003)MS(0.997)PSNMEGYSK
		S(1)EGESQTVLSSGSDPK													RRES(0.996)LS(0.004)Y(0.001)IPK											LVHDS(1)LEDLQMTR												RNS(1)SEASSGDFLDLK											RPQFS(0.033)PT(0.967)GDCQAEAAAAANGTGGEEDDGPAAELLEK
		RQACTAQT(1)PEPLRR													RS(0.001)S(0.999)GFISELPSEEGK											IEVDEGFCS(1)PKPSEIK										P-mut	86	S(0.274)GKQGS(0.726)PDQVS(1)PVSEMTSTSLYQDK											TNLSGRQS(1)PSFK
		AAPWGSNPS(1)PSAESTQAMDR													SPVPKS(1)PVEEAK											EGHSLEMENENLVENGADS(0.999)DEDDNS(0.001)FLK												RS(0.001)S(0.999)GFISELPSEEGK											GGNFGGRS(0.001)S(0.999)GPYGGGGQYFAK
		RPQFS(0.033)PT(0.967)GDCQAEAAAAANGTGGEEDDGPAAELLEK													S(0.944)LNERAET(0.056)PPLPIPPPPPDIQPLER											VHADLVISKPVS(0.003)KS(0.997)PER												SPVPKS(1)PVEEAK											VS(0.017)GS(0.979)PEQAVEENLS(0.001)S(0.001)Y(0.001)S(0.001)LDRR
		RRS(1)LPAGDALYLSFNPPQPSR													VAQRS(1)PVDSGTILREPTTK											SLMS(1)S(1)PEDLTK												SRS(1)VS(1)PCSNVESR											PGVIPSESNGLSRGS(0.996)PS(0.004)K
		LS(0.002)RGDS(0.997)LKEPT(0.001)SIAESSR													VQMT(0.006)S(0.977)PS(0.003)S(0.001)T(0.004)GS(0.009)PMFK											IHRAS(1)DPGLPAEEPKEK												STLNPQWNES(1)FTFK											NVAEALGHS(1)PKDPGGGGGPVR
		DYNASAST(0.004)IS(0.98)PPS(0.015)S(0.001)MEEDK													LSPPY(0.001)S(0.982)S(0.017)PQEFAQDVGR											VIYSQPS(1)ARS(1)EGEFK												S(0.5)PS(0.5)PPLPTHIPPEPPRT(1)PPFPAK											YVDEENS(1)DGETSNHR
		RS(0.907)NS(0.093)APLIHGLSDTSPVFQAEAPSAR													LDGLVET(1)PTGYIESLPR											VGS(1)LDNVGHLPAGGAVK												MEDSMDMDMS(1)PLRPQNYLFGCELK											VNVTVDYIRPAS(0.999)PAT(0.001)ETVPAFSER
		HPNYS(1)PPGSPIEK													HGSGPNIILTGDS(0.004)S(0.996)PGFSK											GPPS(1)PPAPVMHSPS(1)RK												RVTNDIS(1)PES(1)S(1)PGVGR											PGS(1)LPLNAEACWPK
		DY(0.002)EPPS(0.963)PS(0.035)PAPGAPPPPPQR													STLNPQWNES(1)FTFK									P-mim+LPS	133	DRLGS(1)PLAVDEALRR												EINAREESLVEELS(1)PASEK											TSPSGGTWSSVVSGVPRLS(1)PK
		VSAEAEVAPVS(0.997)PEVT(0.01)QEVVEEHCAS(0.993)PEDK													ETNLDS(1)LPLVDTHSK											NAASFPLRSPQPVCS(0.997)PAGS(0.003)EGTPK												ALENGDADEPS(1)FS(1)DPEDFVDDVSEEELLGDVLK											T(0.025)RS(0.975)QEQEVLER
		T(0.036)T(0.164)S(0.794)PPLS(0.005)IPTTHLIHQPAGSR													FLESAAADFS(1)DEDEDDDVDGREK											S(1)QEEPKDTFEHDPSESIDEFNK												S(0.25)ET(0.75)APAAPAAPAPAEKT(1)PVKK											LTFDSSFS(1)PNTGKK
		GFGEYSRS(1)PTF													MEDSMDMDMS(1)PLRPQNYLFGCELK											PIGPDDAIDALSSDFTCGS(0.997)PT(0.003)AAGK												LSSPAAFLPACNS(0.999)PS(0.001)K											AATEALGEKS(1)PDSATVSGYDIMK
		RLS(1)TSPDVIQGHQPR													RVTNDIS(1)PES(1)S(1)PGVGR											SHPAMS(1)PGTPGPTMGR												LKS(1)EDELRPEVDEHTQK											RRS(1)LPAGDALYLSFNPPQPSR
		RQS(0.996)FGGS(0.004)LFAYSPGGAHGMLSSPK													RAPS(0.932)S(0.068)PVAKPGPVK											RS(0.844)S(0.156)DPALIGLSTSVSDSNFSSEEPSR												S(1)YGRPPPDVEGMTSLK											LNHVAAGLVS(0.055)PS(0.945)LK
		RDS(0.992)S(0.008)ESQLASTESDKPTTGR													EINAREESLVEELS(1)PASEK											FIIGSVSEDNS(1)EDEISNLVK												NSSTPGLQVPVS(0.98)PT(0.02)VPIQNQK											ENPFNRKPS(1)PAAS(0.999)PAT(0.001)K
		GWLRDPSAS(1)PGDAGEQAIR													NTGVSPAS(0.002)RPS(0.013)PGT(0.976)PT(0.394)S(0.394)PS(0.087)NLT(0.068)S(0.068)GLK											VAQRS(1)PVDSGTILREPTTK												RS(0.001)S(0.999)PPSAGNSPSSLK											ESAAPAS(1)PAPSPAPSPTPAPPQK
		ADAPDAGAQS(0.995)DS(0.003)ELPS(0.001)Y(0.001)HQNDVSLDR													T(0.914)KFAS(0.086)DDEHDEHDENGATGPVK											S(0.001)PRS(0.999)PQLSDFGLER												AVPPVS(1)PELRKPGPPLS(1)PEIR											LFQLGPPS(1)PVK
		PAETPVATS(1)PTATDSTSGDSSR													LSSPAAFLPACNS(0.999)PS(0.001)K											VILERDTQRGEPEGGS(1)QDQK												LPS(0.002)S(0.998)PVYEDAASFK											YTGEEDGAGGHS(1)PAPPQTEECLR
		VKAS(0.999)PIT(0.001)NDGEDEFVPSDGLDKDEYT(0.003)FS(0.997)PGK													NVSSFPDDAT(0.002)S(0.998)PLQENR											ARPSQFPEQSSSAQQNGSVSDIS(1)PVQAAKK												DLEGLHRAEQS(1)LHDLQER											IYHLPDAES(1)DEDEDFKEQTR
		FLSRSVEDVRPHHT(0.002)DANNQS(0.998)ACFEAPDQK													ASDGSFSLPLKPVIS(0.004)QPIHDS(0.047)KS(0.931)PGAS(0.018)NLK											ETNLDS(1)LPLVDTHSK												S(0.126)CT(0.874)PS(1)PDQISHR											TRT(0.003)DS(0.026)T(0.923)S(0.048)DGRPAWMR
		SCEGQNPELLPKT(1)PIS(1)PLK													VNQSALEAVT(0.005)PS(0.966)PS(0.029)FQQR											FLESAAADFS(1)DEDEDDDVDGREK												RGPGMGVHVPAT(0.001)PQGS(0.999)PMK											LLQTCFSS(1)PADDSMDR
		ASQSRPNS(0.963)S(0.037)ALETLGGEK													KPS(0.998)PS(0.002)ESPEPWK											AS(1)PDQNASTHTPQSSVK												ASAVSELS(1)PRER											TLGT(1)PTQPGSTPR
		AS(0.228)ET(0.772)PPPVAQPKPEAPHPGLETTLQER													RS(0.001)S(0.999)PPSAGNSPSSLK											HVTLPS(0.862)S(0.137)PR												ACTGLSGPGSGSKS(0.999)PPATR											HQEVQDQDPVFQGSDSSGYQS(1)DHK
		ERPSSAIYPS(0.01)DS(0.979)FRQS(0.007)LLGS(0.004)R													AVPPVS(1)PELRKPGPPLS(1)PEIR											SALPVS(0.001)PS(0.002)IS(0.001)S(0.002)APVPVEIENLPQS(0.989)PGT(0.005)DQHDRK												Y(0.004)REY(0.009)S(0.978)PPY(0.008)APS(0.001)HQQYPPSHATPLPK											TLHCEGTEINS(1)DDEQESK
		LRTNREDCFES(0.028)ES(0.972)EDEFYK													LPS(0.002)S(0.998)PVYEDAASFK											EVSSLEGS(1)PPPCLGQEEAVCTK												RPGTQGHLGPEKEEEES(0.998)DGEPEDSSTS											KDS(1)LTQAQEQGNLLN
		QLVRGEPNVSY(1)ICSR													RIPSIVS(0.006)S(0.994)PLNS(0.001)PLDR											SRTAS(1)GSSVTSLDGTR												SYS(1)VVASEYDK											VFIDQNLS(1)PGK
		ADVLEAHEAEAEEPEAGKS(1)EAEDDEDEVDDLPSSR													ET(0.916)RIS(0.084)FVEEDVHPK											AAAMVPGRSES(1)WER												SQLPTLEQDGGTQNPVS(0.005)S(0.994)PGMS(0.001)QELR											DREVAEGGLPRAES(1)PSPAPPPGLR
		TATCHSS(0.004)S(0.004)S(0.992)PPIDAASAEPYGFR													ADTSQEICS(1)PRLPISASHSSK											S(0.002)S(0.002)VKT(0.996)PESIVPIAPELQPSTSR												PAAPPRPLDRES(1)PGVENK											AGPTLTDENGDDLGLPPS(1)PGDTSYYQDQVDDFHEAR
		HDSIPAADTFEDLS(1)DVEGGGSEPTQR													DLEGLHRAEQS(1)LHDLQER											ASLVALPEQTASEEET(1)PPPLLTK												SLLRQPDISCILGTGGKS(1)PR											IPMTPTSSFVSPPPPT(0.009)AS(0.981)PHS(0.01)NR
		LKETCVSGEDPTQGADLS(1)PDEK													S(0.126)CT(0.874)PS(1)PDQISHR											GQSTGKGPPQS(1)PVFEGVYNNSR												GS(0.001)VPLS(0.047)S(0.9)S(0.04)PPAT(0.012)HFPDETEITNPVPKK											GPPS(1)PPAPVMHS(0.921)PS(0.079)RK
		RVALS(1)DDETK													ASAVSELS(1)PRER											S(0.039)LS(0.912)S(0.049)PTDNLELSLR												T(0.286)VS(0.423)GPGT(0.291)PEPRPAT(0.99)PGAS(0.002)S(0.008)VEQLRK											GIS(0.997)QT(0.003)NLITTVT(1)PEK
		HSCSPMGDGDPEAMEES(1)PRKK													SFS(0.998)S(0.002)PENFQR											RIPSIVS(0.006)S(0.994)PLNS(0.001)PLDR												SHGLEPAAPS(1)PR											RHGAPAAPS(1)PPPR
		NRGLS(1)APDLR													Y(0.004)REY(0.009)S(0.978)PPY(0.008)APS(0.001)HQQYPPSHATPLPK											AAAVAAAGAGEPQS(1)PDELLPK												S(0.156)PS(0.844)PPLPT(0.065)HIPPEPPRT(0.936)PPFPAK											GACRLPLCSLPGEPGNGPDQQLQRS(1)PPEFQ
		S(1)PGASNFSTLPK													SRPTPQDY(0.002)EMRVS(0.995)PS(0.002)DTTPLVSR											RSS(0.023)S(0.977)EDAESLAPR												KFELLPT(1)PPLS(0.5)PS(0.5)RR											NSNSPPS(1)PSSMNQR
		GASDVGAGEPGPERAPLS(1)PGRK													RPGTQGHLGPEKEEEES(0.998)DGEPEDSSTS											RQQDPS(0.999)PGS(0.001)NLGGGDDLK												AAGGAT(0.001)AGS(0.006)RQPS(0.991)VET(0.002)LDSPTGSHVEWCK											NATDLQNS(0.001)S(0.999)MSEEELTK
		SQEPIPDDQKVS(1)DDDKEK													AAQPPAQPCQLCGRS(1)PLGEAPPGTPPCR											LPDLS(1)PVENK												RRAGDPGEMPQS(1)PTGLGQPK											HQDGLPYIDDS(1)PSSSPHLSSK
		VAPVINNGS(0.022)PT(0.978)ILGK													TYSLGS(1)ALRPSTSR											NKPRS(1)PVVELSK												LSMEDS(0.994)KS(0.006)PPPK											ADHS(1)FSDGVPSDSVEAAK
		S(0.001)AS(0.001)VTASS(0.003)ES(0.995)PVEIQNPYLHVEPEK													TVLPTVPES(1)PEEEVK											GAPHRHS(1)MPELGLR												AKPPADPAAAAS(1)PCR											GYLT(1)DLNSMIPTHGGDINDIKK
		NSSTPGLQVPVS(0.006)PT(0.994)VPIQNQK													SYS(1)VVASEYDK											VQS(1)PEPPAPER												GHTDTEGRPPS(1)PPPT(0.913)S(0.028)T(0.059)PEK											LKIS(1)PEQHWDFTAEDLK
		T(1)FPASNYTVSSR													S(0.018)IS(0.972)LS(0.01)QSAENVPASK											ATTATMAT(0.03)S(0.869)GS(0.101)ARK												MVIQGPS(0.896)S(0.104)PQGEAMVTDVLEDQK											SAFTPATATGS(0.001)S(0.004)PS(0.995)PVLGQGEK
		METDAPQPGLAS(1)PDSPHDPCK													SEPFS(0.982)PS(0.018)LRPEPPKHPESIK											SFS(0.998)S(0.002)PENFQR												AAESLTAIPEPAS(0.999)PQLLETPIHASQIQK											DPAQPMS(1)PGEATQSGARPADR
		WLEEADSSS(0.001)GS(0.998)PTSIDK													EHSLQVS(1)PSLEK											NSQS(1)FDSSLHGAGNGISR												LQTTDNLLPMS(1)PEEFDEVSR											SLLRQPDISCILGTGGKS(1)PR
		S(1)PGVAAAVAEDGGLK													INNYLTVPAHKLDS(0.995)PT(0.002)MS(0.003)R											RQACTAQT(1)PEPLRR												LEEPPELNRQS(1)PNPRR											ADEAALALQPGGS(0.045)PS(0.011)AAGADREAAS(0.972)S(0.972)PAGEPLRK
		TAEGDVGDY(0.002)RCPQDQS(0.997)PDRVGT(0.001)EMEQVSK													LKNGFPHPEPDCNPS(0.002)EAAS(1)EES(0.999)NS(0.999)EIEQEIPVEQK											SYIGSNHSSLGS(0.003)MS(0.997)PSNMEGYSK												LSSQIS(1)AGEEK											LDSQPQET(0.001)S(0.999)PELPR
		EPHS(1)PADQPEQQAESTLTSAETR													RACAS(0.017)PS(0.983)AQVEGSPVAGSDGSQPAVK											VS(0.017)GS(0.979)PEQAVEENLS(0.001)S(0.001)Y(0.001)S(0.001)LDRR												LGS(1)PDYGNSALLSLPGYRPTTR											DLVLPTQALPAS(1)PALK
		EGS(1)PIPHDPEFGSK													YTPTSPSYSPS(0.069)S(0.93)PEYT(0.001)PTSPK											ELVGPPLAETVFT(0.001)PKT(0.881)S(0.118)PENVQDR												EHAPLAS(1)PVENK											LRTNLQPLESTQS(1)QDF
		KVDLTLLS(1)PK													GAMPPAPVPAGTPAPPGPATMMPDGT(0.006)LGLT(0.903)PPT(0.069)T(0.022)ER											LNHVAAGLVS(0.055)PS(0.945)LK												GRPPAEKLS(1)PNPPK											TMLLLS(0.999)RS(0.001)PEAQPK
		KLS(1)GDQITLPTTVDYSSVPK													AGGPTTPLS(0.023)PT(0.977)RLSR											SFSKEELMS(1)S(1)DLEETAGSTSIPK												TAESQT(1)PTPSATSFFSGK											GGPAS(1)PGGLQGLETR
		EKPELS(0.004)EPS(0.033)HLNGPS(0.861)S(0.102)DPEAAFLS(0.001)R													RDS(0.992)S(0.008)ESQLASTESDKPTTGR											S(0.003)LNERAET(0.997)PPLPIPPPPPDIQPLER												ENPPVEDS(1)S(1)DEDDKRNQGNLYDK											VLST(0.008)S(0.987)T(0.005)DLEAAVADALK
		RGEGDAPFSEPGTTSTQRPS(0.973)S(0.024)PET(0.001)AT(0.001)K													SLLRQPDISCILGTGGKS(1)PR											TLGT(1)PTQPGSTPR												LENVSQLSLDKS(1)PTEK											ADHSFS(1)DGVPSDSVEAAK
		KGPRT(1)PS(1)PPPPIPEDIALGK													ISLPLPNFS(0.913)S(0.087)LNLR											HPNYS(1)PPGSPIEK												VAS(0.003)S(0.997)PVMVSNPATR											VKAS(0.987)PIT(0.013)NDGEDEFVPS(1)DGLDKDEYT(0.001)FS(0.999)PGK
		LS(0.001)ESQLSFRRS(0.998)PT(0.001)K													LGDVS(1)PTQIDVSQFGSFK											DY(0.002)EPPS(0.963)PS(0.035)PAPGAPPPPPQR												APGS(0.998)PRGQHEPS(0.002)KPPPAGETVTGGFGAK											TEAQDLCRAS(1)PEPPGPESSSR
		S(0.999)MPVDERDLQAALT(0.001)PGALTAAAAGTGTQGPR													TTTAAAVAS(0.007)T(0.005)GPS(0.017)S(0.01)RS(0.96)PSTLLPK											VSAEAEVAPVS(0.997)PEVT(0.01)QEVVEEHCAS(0.993)PEDK												VAPVINNGS(0.999)PT(0.001)ILGK											DGQVINET(0.001)S(0.999)QHHDDLE
		RVS(1)FADPIYQAGLADDIDRR													GPPDFS(0.999)S(0.999)DEEREPT(0.044)PVLGS(0.958)GAAAAGR											GPIAQWADGAIS(1)PNGHRPQLR												RAPS(0.932)S(0.068)PVAKPGPVK											RQVS(1)ASELHTSGILGPETLR
		ESEDSETQPFDTHLEAYGPCLS(1)PPR													S(0.01)FS(0.01)KEELMS(0.391)S(0.592)DLEET(0.99)AGS(0.005)T(0.002)S(0.001)IPK											LAAFADALEFADEEKES(0.999)PVEFT(0.001)GHK												NTGVSPAS(0.002)RPS(0.013)PGT(0.976)PT(0.394)S(0.394)PS(0.087)NLT(0.068)S(0.068)GLK											EADDDEEVDDNIPEMPS(1)PKK
		RDS(1)FDNCSLGESSK													KVPS(1)FTFTPTVTYQR											VGSPLDYSLVDLPSTNGQS(1)PGK												EAPAEGEAAEPGS(1)PTAAEGEAASAASSTSSPK											GRLDSSEMDHS(1)ENEDYTMSSPLPGK
		S(0.006)AS(0.993)LS(0.001)NLHSLDR													RPAEAT(0.996)S(0.007)S(0.025)PT(0.279)S(0.693)PERPR											DPAQPMS(1)PGEATQSGARPADR												RAS(1)GQAFELILS(1)PR											S(0.076)T(0.076)S(0.848)PFGIPEEASEMLEAKPK
		AFS(1)QVQCLDDNHVNWR													KFQDLSEGSSISQLSFAEDIS(1)ADEDDQILSQGK											LTQTSGQSTHTHKEPAS(1)GDEGIK												NVSSFPDDAT(0.002)S(0.998)PLQENR											AASADSTTEGT(1)PADGFTVLSTK
		S(0.944)LNERAET(0.056)PPLPIPPPPPDIQPLER													NRGLS(1)APDLR											LLSPQMS(1)GEEEDSDLAAK												ASDGSFSLPLKPVIS(0.004)QPIHDS(0.047)KS(0.931)PGAS(0.018)NLK											S(0.673)S(0.327)PPEGKLETK
		SPS(1)PGLFR													NREELGFRPEYSAS(1)QLK											ASQSRPNS(0.963)S(0.037)ALETLGGEK												VNQSALEAVT(0.005)PS(0.966)PS(0.029)FQQR											SNTACDGDKES(1)EVEDVETDSGNSPEDLRK
		EKGS(1)FSDTGLGDGK													KFELLPT(1)PPLS(0.5)PS(0.5)RR											RIPS(0.007)IVS(0.555)S(0.438)PLNS(1)PLDR												KPS(0.998)PS(0.002)ESPEPWK											NFVFHTLS(1)PVK
		SHILEQHPHT(0.002)LDLS(0.99)PS(0.008)EK													DSGRGDSVSDSGSDALRSGLTVPT(0.005)S(0.995)PK											ISLPLPNFS(0.913)S(0.087)LNLR												ET(0.916)RIS(0.084)FVEEDVHPK											GAASTLVPGVSETSAS(0.004)PGS(0.981)PS(0.014)VR
		LDGLVET(1)PTGYIESLPR													S(0.001)AS(0.001)VTASS(0.003)ES(0.995)PVEIQNPYLHVEPEK											PVAPQVPS(0.998)PGGAPGQGPY(0.002)PYSLSEPAPLTLDTSGK												ADTSQEICS(1)PRLPISASHSSK											VSSSSGTTPFSSAAALPPGSYAS(1)LGR
		S(0.612)FGS(0.384)PNRAYT(0.004)HQVVT(1)R													DIDIS(0.003)S(0.997)PEFK											ADVLEAHEAEAEEPEAGKS(1)EAEDDEDEVDDLPSSR												S(0.887)PS(0.113)PPLPT(0.05)HIPPEPPRT(0.95)PPFPAK											AS(0.004)PS(0.996)PQPSSQPLQIHR
		AHLPLGQS(0.846)NS(0.133)CGS(0.021)VLPPSLAAMAK													RRAGDPGEMPQS(1)PTGLGQPK											TEELIES(1)PKLESSEGEIIQTVDR												INPYMS(0.007)S(0.993)PCHIEMILTEK											ISNLS(1)PEEEQGLWK
		SVDYNMPRS(1)PVEMDEDFDVIFDPYAPK													RIS(0.998)T(0.001)S(0.001)DILSEK											SNS(1)GVRLDGYAR												GLAS(1)PTAITPVASAICGK											VDEGAGDSAAVASGGAQTLALAGS(0.973)PAPS(0.027)GHPK
		ANSWQLVET(1)PEK													RAPS(0.041)S(0.959)PVAKPGPVK											S(1)QPSPVTVKPKPPAR												TYSLGS(1)ALRPSTSR											SFNYS(1)PNSSTSEVSSTSASK
		STLES(0.001)EKPGS(0.999)PEAAETSPPSNIIDHCEK													KTPSKPPAQLS(0.991)PS(0.009)VPK											KQFS(1)LENVQEGEILHDAK												SEPFS(0.982)PS(0.018)LRPEPPKHPESIK											S(0.046)GGLQT(0.954)PECLS(1)REGS(1)PIPHDPEFGSK
		AEESRKPS(0.003)APS(0.997)PPDQTPEEDLVIVK													NSSTPGLQVPVS(0.006)PT(0.994)VPIQNQK											S(0.001)AS(0.001)VTASS(0.003)ES(0.995)PVEIQNPYLHVEPEK												EHSLQVS(1)PSLEK											TPVSGS(0.999)LKSPVPR
		LS(0.007)QS(0.007)S(0.021)QDS(0.107)S(0.856)PVRNLQS(0.002)FGTEEPAYSTRR													MVIQGPS(0.896)S(0.104)PQGEAMVTDVLEDQK											AGGPTT(1)PLSPTR												LKNGFPHPEPDCNPS(0.002)EAAS(1)EES(0.999)NS(0.999)EIEQEIPVEQK											LREQT(0.007)LS(0.993)PTITSGLHNIAR
		AS(0.158)QS(0.842)RPNS(0.864)S(0.135)ALET(0.001)LGGEK													ASAVS(1)PANLPAVLLQPR											NSSTPGLQVPVS(0.006)PT(0.994)VPIQNQK												RACAS(0.017)PS(0.983)AQVEGSPVAGSDGSQPAVK											DMDEPS(1)PVPNVEEVTLPK
		VTGTEGSSSTLVDYTSTSSTGGS(1)PVRK													SIPLECPLS(0.951)S(0.049)PK											T(1)FPASNYTVSSR												GAMPPAPVPAGTPAPPGPATMMPDGT(0.006)LGLT(0.903)PPT(0.069)T(0.022)ER											T(0.002)PQPCS(0.998)RPAS(0.999)PEPELLPEADS(0.001)K
		NLEQILNGGES(1)PKQK																								ALVVPEPEPDS(0.001)DS(0.999)NQER												RRS(1)PSPTPTPGPS(1)R											LS(0.415)S(0.568)LRAS(0.005)T(0.006)S(0.008)KS(0.74)ES(0.258)S(1)QK
		LFDVCGS(1)QDFESDLDRLK																								SILVS(0.997)PT(0.002)GPSR												HSHSHS(0.996)PMS(0.002)T(0.002)R											RFPEAEALS(1)PEQAAHYLR
		NAS(1)AS(1)FQELEDKK																								METDAPQPGLAS(1)PDSPHDPCK												IEEVLSPEGSPSKS(1)PSK											AFAAVPTSHPPEDAPAQPPTPGPAAS(0.998)PEQLS(0.001)FR
		T(0.914)KFAS(0.086)DDEHDEHDENGATGPVK																								WLEEADSSS(0.001)GS(0.998)PTSIDK												LGDVS(1)PTQIDVSQFGSFK											T(1)PKGPSSVEDIK
		HVS(1)PVT(1)PPREVPIYANR																								TAEGDVGDY(0.002)RCPQDQS(0.997)PDRVGT(0.001)EMEQVSK												S(1)GDETPGSEVPGDK											MDSAGQDINLNS(1)PNK
		NLS(1)PGAVESDVR																								SWLSPRVS(1)PPASPGP												RES(1)PPIRAFEGAITK											YGMGT(0.013)S(0.987)VER
		KNQKPSQVNGAPGS(1)PTEPAGQK																								VPEEAAQDRPMS(1)PGDCPPETTETPK												VIHDNFGIVEGLMTTVHAIT(0.001)AT(0.999)QK											RSS(1)PAAFINPPIGTVTPALK
		SLVESVSS(0.061)S(0.939)PNK																								ASAVS(1)PANLPAVLLQPR												KFQDLSEGSSISQLSFAEDIS(1)ADEDDQILSQGK											IHNVGS(1)PLK
		S(1)QEMVHLVNK																								DYEIESQNPLAS(1)PTNTLLGSAK												LHS(0.01)S(0.986)S(0.004)LELGPRPLEQENER											S(0.08)GEIPS(0.08)EQHPGAS(0.422)AS(0.423)PPCAS(0.985)PPVS(0.005)APAS(0.005)WDFGVPQR
		AAPPPPALT(1)PDSQTVDSSCK																								S(0.015)VS(0.985)VDESRPELIFR												DSGRGDSVSDSGSDALRSGLTVPT(0.005)S(0.995)PK											S(1)RS(1)PLGFYVHLK
		ES(0.994)KEEET(0.005)S(0.001)IDVAGKPNEVTK																								SIPLECPLS(0.951)S(0.049)PK												DIDIS(0.003)S(0.997)PEFK											T(0.016)ENGT(0.016)CPS(0.958)PPQPLS(0.01)PAAALGSGSAAAVPK
		LDLLGNLPGS(1)K																								IACRS(1)PQPDPVGT(0.993)PT(0.007)IFKPQSK												RAPS(0.041)S(0.959)PVAKPGPVK											RFIQENVFVAANHNGS(1)PLSIK
		SEPVKEES(0.977)S(0.023)ELEQPFAQDTSSVGPDRK																								VT(0.005)QQEKT(0.994)PPPRPS(0.001)PLEAGS(0.001)DGCEEPK												RIS(0.998)T(0.001)S(0.001)DILSEK											T(0.015)AS(0.98)FS(0.003)ES(0.002)RADEVAPAK
		VQDT(0.004)S(0.994)NT(0.002)GLGEDIIHQLSK																								EKPELS(0.004)EPS(0.033)HLNGPS(0.861)S(0.102)DPEAAFLS(0.001)R												AS(0.018)PS(0.018)CS(0.947)S(0.016)PTRDSSGVPVSK											TMIIS(1)PERLDPFADGGK
		NDSDLFGLGLEEAGPKES(1)S(1)EEGKEGK																								RKQS(0.984)S(0.013)S(0.002)EIS(0.002)LAVER										P-mim	154	KPPAPDPFARS(0.048)S(0.952)PR											S(1)QPSPVTVKPKPPAR
		S(1)HDNVYSLGGLEGRK																								DFNRT(0.002)PGS(0.997)RQAS(0.915)PT(0.085)EVVER												SHILEDDENS(1)VDISMLK											AGGPTT(1)PLSPTR
		RMS(1)PKPELTEEQK																								RVS(1)FADPIYQAGLADDIDRR												PIGPDDAIDALSSDFTCGS(0.997)PT(0.003)AAGK											TTS(0.999)PPEVSGYSYEK
		AQT(1)PPGPSLSGS(0.062)KS(0.938)PCPQEK																								IRTS(0.001)PT(0.999)FR												SHPAMS(1)PGTPGPTMGR											TKEVYELLDS(1)PGK
		YNLDAS(1)EEEDSNKK																								RPQYS(1)NPPVQGEVMEGADNQGAGEQGRPVR												ATLSSTSGLDLMSESGEGEIS(0.997)PQREVS(0.003)R											KDGS(0.005)S(0.995)PPLLEK
		KLS(1)LPTDLKPDLDVK																								VQMT(0.006)S(0.977)PS(0.003)S(0.001)T(0.004)GS(0.009)PMFK												S(1)LEQDALRAQMVLSR											RARHDS(1)PDLAPNVTYSLPR
		IKPVT(0.002)ENLVLS(0.003)S(0.006)HT(0.012)GFCQS(0.982)S(0.989)GDEALS(0.007)K																								RGS(0.993)GDT(0.004)S(0.001)S(0.001)LIDPDTSLSELRESLSEVEEK												RS(0.844)S(0.156)DPALIGLSTSVSDSNFSSEEPSR											RFIQELSGSS(1)PK
		RSVQEGENPDDGVRGS(1)PPEDYR																								SHILEQHPHT(0.002)LDLS(0.99)PS(0.008)EK												FIIGSVSEDNS(1)EDEISNLVK											LSMEDS(0.994)KS(0.006)PPPK
		AAAAPDSRVS(1)EEENLK																								RIPVLS(1)PKPAVAPPAPPSSSQLCR												ISQDADLKT(0.999)PT(0.001)KPK											AS(1)GVAVSDGVIK
		VTKNEEPS(1)EEEIDAPKPK																								GRECS(0.997)PT(0.001)S(0.001)SLER												GAGPQLLEELDNAPGS(0.003)DAAELELAPART(0.99)PPDS(0.007)VK											T(1)FPASNYTVSSR
		RSQANGAGALS(0.001)YVS(0.999)PNTSK																								SVDYNMPRS(1)PVEMDEDFDVIFDPYAPK												S(0.001)PRS(0.999)PQLSDFGLER											RPDHSGGS(1)PS(0.999)PPT(0.001)SEPAR
		AAQPPAQPCQLCGRS(1)PLGEAPPGTPPCR																								NIIGS(0.002)S(0.998)PVADFSAIK												IGQQVDREPGDVAT(1)PPRK											GLPPS(1)MERGYPPPR
		RKHS(1)EEAEFTPPLK																								LHS(0.957)S(0.043)NPNLSTLDFGEEK												ARPSQFPEQSSSAQQNGSVSDIS(1)PVQAAKK											SILVS(0.997)PT(0.002)GPSR
		EDILENEDEQNS(1)PPKK																								RIS(1)LSDMPR												IPGTPGAGGRLS(1)PENNQVLTK											LFIIRGS(1)PQQIDHAK
		TVLPTVPES(1)PEEEVK																								T(0.251)GS(0.336)PS(0.39)S(0.021)S(0.004)AS(0.032)ACS(0.964)PGGMLS(0.001)SAGGAPEGKDDKK												AS(1)PDQNASTHTPQSSVK											AGTRTDSREDEIS(1)PPPPNPVVK
		KPRPS(1)EGDEDCLPASK																								NLS(1)PGAVESDVR												SRTAS(1)GSSVTSLDGTR											SWLSPRVS(1)PPASPGP
		IEVDEGFCS(1)PKPSEIK																								RS(0.019)PS(0.975)AS(0.004)S(0.002)LSSMSSVASSVSSRPSR												LGPGRPLPTFPTSECT(0.006)S(0.994)DVEPDTR											YLS(1)FTPPEK
		NQLNKETDPVKS(1)PPLPEHQK																								S(0.121)PT(0.879)MEQAVQTASAHLPAPAAVGRR												S(0.002)S(0.002)VKT(0.996)PESIVPIAPELQPSTSR											ASMSEFLES(1)EDGEVEQQR
		S(0.004)KS(0.996)DATASISLSSNLK																								TALPAQS(0.002)AAT(0.998)LPAR												QQPPEPEWIGDGEST(0.001)S(0.998)PSDK											RSVVS(1)FDK
		S(1)PLHIKDDVLPK																								KPGDGEVS(0.998)PS(0.001)T(0.001)EDAPFQHSPLGK												KLPPPPGS(1)PLGHS(0.996)PT(0.003)AS(0.001)PPPTAR											S(1)LVGTPYWMAPELISR
		GAEAFGDS(1)EEDGEDVFEVEK																								NDSDLFGLGLEEAGPKES(1)S(1)EEGKEGK												RSS(0.023)S(0.977)EDAESLAPR											DEKPPLCEKPPPS(0.992)PDIT(0.008)GR
		KSPVGKS(1)PPSTGSTYGSSQK																								AYS(1)FCGTVEYMAPEVVNR												RQQDPS(0.999)PGS(0.001)NLGGGDDLK											VGEDEDGS(1)DEEVVHNEDIHFEPIVSLPEVEVK
		ELEIGQAGSQRAPS(1)AK																								TVSLGAGAKDELHIVEAEAMNYEGS(1)PIK												LPDLS(1)PVENK											SLLSHEFQDET(1)DT(0.999)EEETLYSSK
		YTPTSPSYSPS(0.069)S(0.93)PEYT(0.001)PTSPK																								VISRPPPS(0.903)VS(0.097)PPK												NKPRS(1)PVVELSK											LLEENETEAVTVPT(0.001)PS(0.996)PT(0.003)PVR
		T(0.067)QT(0.933)PPVS(0.001)PAPQPTEERLPSSPVYEDAASFK																								AIS(1)SANLLVR												GAPHRHS(1)MPELGLR											LEEPPELNRQS(1)PNPRR
		FLPLNIRNS(1)PFTR																								ASIANSDGPTAGSQT(1)PPFK												MVEPENAVTIT(0.001)PLRPEDDY(0.021)S(0.978)PRER											DKDDQEWESPS(1)PPKPTVFISGVIAR
		S(0.102)VS(0.882)T(0.016)T(0.001)NIAGHFNDESPLGLRR																								S(0.019)GS(0.06)ALLQS(0.822)QS(0.788)S(0.239)T(0.071)EDPKDEPAELKPDSEDLSSQSSASK												VQS(1)PEPPAPER											KSEAGHAS(1)S(0.999)PDS(0.001)EVTSLCQK
		LFPDT(1)PLALDANKK																								FQTGNKS(1)PEVLR												ESEEGNPVRGSEEDS(1)PKK											NYQQNYQNS(1)ESGEK
		AIPVS(0.032)PS(0.968)AVEEDEDEDGHTVVATAR																								SRESAS(0.001)PT(0.999)IPNLDLLEAHTK												ATTATMAT(0.03)S(0.869)GS(0.101)ARK											TIGGGDDS(1)FNTFFSETGAGK
		GNDPLTSS(1)PGR																								NKAS(1)PQSEFMPSK												LRS(1)DPGPPTETPSQRPSPLK											EGRPSGEAFVELES(1)EDEVK
		ENLQPQSSGVQGQVPIS(1)PEPLQRPEMLK																								LFTPS(0.002)RS(0.998)QEEEEEK												FLKS(1)PPLHK											DFDHHDSPALEVFTEQPPS(1)PLPK
		TSQPPVPQGEAEEDS(1)QGK																								TVLPTVPES(1)PEEEVK												NSQS(1)FDSSLHGAGNGISR											FNLS(1)QESSYIATQYSLRPR
		ARLGEAS(1)DSELADADK																								SPVPKS(1)PVEEK												VAS(0.001)GVLS(0.999)PPPAAPPPSSSSVPEAGGPPIKK											TSGSGFHREGNTTEDDFPS(0.839)S(0.161)PGNGNK
		NAASFPLRS(1)PQPVCSPAGSEGTPK																								TAADVVS(1)PGANSVDSR												GT(0.01)EAPAVVT(0.99)EEEDDDEETAPPVIAPRPDHTK											LLDAEDVDVPS(1)PDEK
		ALEAASLS(0.001)QHPPS(0.003)LCIS(0.997)DS(1)EEEEEERK																								T(0.188)QT(0.812)PPVS(1)PAPQPTEER												DSSFTEVPRS(1)PK											EGS(1)PIPHDPEFGSK
		YRPENTPEPVSTSVSHYGAEPT(0.027)T(0.196)VS(0.778)PCPS(0.803)S(0.105)S(0.091)AK																								ETSVSKEDTDHEEKAS(1)NEDVTK												VS(0.017)GS(0.979)PEQAVEENLS(0.001)S(0.001)Y(0.001)S(0.001)LDRR											KPT(0.001)HS(0.999)QEPQGPEAMER
		TTTAAAVAS(0.007)T(0.005)GPS(0.017)S(0.01)RS(0.96)PSTLLPK																								LFPDT(1)PLALDANKK												MPDEPEEPVVAVS(0.059)S(0.941)PAVPPPTK											RSLATMDS(1)PPHQK
		TPSPKEEDEEPES(1)PPEKK																								AIPVS(0.032)PS(0.968)AVEEDEDEDGHTVVATAR												ELVGPPLAETVFT(0.001)PKT(0.881)S(0.118)PENVQDR											YKDIIRQPS(1)EEEIIK
		SETAPLAPT(1)IPAPAEKTPVKK																								AS(0.09)S(0.909)LNENVDHS(0.001)ALLK												HSGPNS(1)ADSANDGFVR											AQQELVPPQQQAS(1)PPQLPK
		SRPFTVAASFQSTSVKS(1)PK																								YRPENTPEPVSTSVSHYGAEPT(0.027)T(0.196)VS(0.778)PCPS(0.803)S(0.105)S(0.091)AK												LNHVAAGLVS(0.055)PS(0.945)LK											SPS(1)FASEWDEIEK
		S(0.771)VS(0.229)VDESRPELIFR																								ASEPLLS(1)PPPFGESRK												SFSKEELMS(1)S(1)DLEETAGSTSIPK											KLS(0.995)S(0.005)GDLRVPVTR
		KVPS(1)FTFTPTVTYQR																								RPQRAT(1)S(1)NVFAMFDQSQIQEFK												NDS(1)PTQIPVSSDVCR											RVSLEPHQGPGT(1)PESK
		AAAT(1)PESQEPQAK																								TSSGDPPS(1)PLVK												S(0.003)LNERAET(0.997)PPLPIPPPPPDIQPLER											GAILSEEELAAMS(1)PTAAAVAK
		QILIACS(1)PVSSVR																								WCPTTNKPVKS(0.993)PT(0.007)PT(0.001)VNPR												VIS(0.002)HDRDS(0.998)PPPPPPPPPPPQPQPSLK											AS(0.401)T(0.519)FCGT(0.079)PDY(0.001)IAPEILQGLK
		DLLHPS(1)PEEEK																								VQIS(0.004)PDS(0.996)GGLPER												TLGT(1)PTQPGSTPR											ACPEEPAAPS(1)PEPR
		VGHMS(0.798)S(0.202)VELDDELLDPDMDPPHPFPK																								S(0.771)VS(0.229)VDESRPELIFR												GPIAQWADGAIS(1)PNGHRPQLR											ILSQS(0.994)T(0.006)DSLNMR
		EIAIVHS(1)DAEKEQEEEEQKQEMEVK																								APRS(1)PPVGSGPASGVEPTSFPVESEAR												LAAFADALEFADEEKES(0.999)PVEFT(0.001)GHK											VAKVS(1)QGVEDGPDTK
		QQSHFAMMHGGTGFAGIDS(0.042)S(0.034)S(0.923)PEVK																								KPGPPLS(1)PEIR												VGSPLDYSLVDLPSTNGQS(1)PGK											SLPAPVAQRPDS(1)PGGGLQAPGQK
		QEAKPQQAAGMLS(1)PK																								T(0.123)LS(0.844)PT(0.031)PAS(0.001)ATAPTSQGIPT(0.479)S(0.479)DEES(0.021)T(0.021)PKK												DPAQPMS(1)PGEATQSGARPADR											RIITYNEAMDS(1)PDQ
		RS(0.016)NS(0.984)APLIHGLSDTSPVFQAEAPSAR																								FAQSAPGS(1)PLSSQPVLITVQR												LTQTSGQSTHTHKEPAS(1)GDEGIK											RS(0.014)LS(0.976)MDS(0.01)QVPVYSPSIDLK
		TAFDEAIAELDTLS(1)EESYK																								KEES(1)EES(1)DDDMGFGLFD												LLSPQMS(1)GEEEDSDLAAK											TVT(1)PASS(0.003)AKT(0.123)S(0.874)PAK
		VGS(1)LDNVGHLPAGGAVK																								KTPSKPPAQLS(0.991)PS(0.009)VPK												RIPS(0.007)IVS(0.555)S(0.438)PLNS(1)PLDR											IVRGDQPAASGDS(1)DDDEPPPLPR
		RNS(1)SEASSGDFLDLK																								LIPLDEECSMDETPYVETLEPGGS(0.927)GGS(0.07)PDGAGGS(0.003)K												VLST(0.008)S(0.987)T(0.005)DLEAAVADALK											IPSTENSSQEISVEERT(0.999)PT(0.001)K
C70A+LPS	84	S(0.032)GS(0.968)DAGEARPPTPASPR																								S(0.004)NS(0.996)LVSTFTMEK												S(0.858)KS(0.142)PS(0.98)PPRLT(0.02)EDR											RDS(1)FDNCSLGESSK
		S(1)QEEPKDTFEHDPSESIDEFNK																								NPEDKS(1)PQLSLSPRPAS(1)PK												ERPISLGIFPLPAGDGLLT(1)PDAQK											AT(0.001)LPS(0.999)PDKLPGFK
		MSCFSRPSMS(1)PTPLDR																																				PVAPQVPS(0.998)PGGAPGQGPY(0.002)PYSLSEPAPLTLDTSGK											ILDPNTGEPAPVLS(0.065)S(0.019)PPPADVS(0.458)T(0.458)FLAFPS(1)PEK
		RRES(0.996)LS(0.004)Y(0.001)IPK																																				RQSNVAAPGDAT(1)PPAEK											ASSPAES(0.021)S(0.979)PEDSGYMR
		SKPIPIMPAS(1)PQK																																				T(0.011)RT(0.011)DS(0.934)Y(0.002)S(0.04)AGQS(0.001)VEILDGVELGEPAHK											VLNTGS(1)DVEEAVADALKK
		FKIDSNIS(1)PKK																																				S(1)RIEQGIVDR											VQMT(0.006)S(0.977)PS(0.003)S(0.001)T(0.004)GS(0.009)PMFK
		S(0.046)NS(0.954)GLGGEVSGVMSK																																				RGS(0.999)PTTGFIEQK											AAPEEHDS(1)PTEASQPIVEEEETK
		AKS(1)PTPESSTIASYVTLRK																																				SNS(1)GVRLDGYAR											LVPS(1)QEETK
		ETNLDS(1)LPLVDTHSK																																				ALAAVPSAGSVQRVPS(1)GAAGGK											SHILEQHPHT(0.002)LDLS(0.99)PS(0.008)EK
		PFKLS(1)GLS(1)FKR																																				S(1)QPSPVTVKPKPPAR											LTTT(0.001)GQVT(0.007)S(0.992)PVK
		SSGVVPQS(1)APPVPTASSR																																				RQS(0.998)S(0.001)S(0.001)YDDPWK											LDGLVET(1)PTGYIESLPR
		SLS(1)VEHLETK																																				IDGAT(0.001)QS(0.008)S(0.991)PAEPK											GISEDSHLESLQDVGQSAAPT(0.019)FMIS(0.977)PET(0.003)VT(0.001)GTGKK
		AAAMVPGRSES(1)WER																																				AGGPTT(1)PLSPTR											KCS(1)LPAEEDSVLEK
		EIESEIDS(1)EEELINKK																																				HFPLDLRT(0.01)S(0.99)MDGK											LENVSQLSLDKS(1)PTEK
		MPFQT(0.05)S(0.95)PGGK																																				KPTGSLPS(0.999)PS(0.001)GVRK											DGTAPPPQSPGSPGT(0.002)GQDEEWS(0.998)DEESPRK
		VFQT(1)EAELQEVISDLQSK																																				ALVVPEPEPDS(0.001)DS(0.999)NQER											SDEFSLADALPEHS(1)PAK
		AGLGS(0.998)PERPPKT(0.783)S(0.219)PGS(1)PR																																				SILVS(0.997)PT(0.002)GPSR											KPS(0.992)PS(0.009)ES(1)PEPWKPFPAVSPEPR
		SYIGSNHSSLGS(0.003)MS(0.997)PSNMEGYSK																																				SWLSPRVS(1)PPASPGP											EQNSALPTS(0.009)S(0.991)QDEELMEVVEK
		S(0.018)IS(0.972)LS(0.01)QSAENVPASK																																				VPEEAAQDRPMS(1)PGDCPPETTETPK											STLES(0.001)EKPGS(0.999)PEAAETSPPSNIIDHCEK
		AHS(1)PVQSGLPGMQNLK																																				S(0.001)T(0.001)AQQELDGKPAS(0.014)PT(0.984)PVIVASHTANKEEK											YQT(1)QPVTLGEVEQVQSGK
		MSCFSRPSMS(0.009)PT(0.991)PLDR																																				MDRGVS(1)MPNMLEPK											DSITPDIATKPGQPLFLDS(0.015)IS(0.985)PKK
		INNYLTVPAHKLDS(0.995)PT(0.002)MS(0.003)R																																				VGDGDLS(1)AEEIPENEVSLRR											AT(0.001)S(0.001)PQKS(0.004)PS(0.994)VPK
		AYS(1)PEYR																																				SRTDSLAAT(1)PPAAK											AVQQHQHGY(0.001)DS(0.999)DEEVDSELGTWEHQLR
		TRT(0.003)DS(0.026)T(0.923)S(0.048)DGRPAWMR																																				DYEIESQNPLAS(1)PTNTLLGSAK											MHRDS(1)CPLDCK
		AQLEPVAS(1)PAKKPK																																				S(0.015)VS(0.985)VDESRPELIFR											DVS(1)GLRDVK
		RRS(0.898)S(0.067)T(0.035)VAPAQPDGAESEWTDVETR																																				IACRS(1)PQPDPVGT(0.993)PT(0.007)IFKPQSK											FQSPQIQATIS(1)PPLQPK
		AGGPTTPLS(0.023)PT(0.977)RLSR																																				VT(0.005)QQEKT(0.994)PPPRPS(0.001)PLEAGS(0.001)DGCEEPK											GRS(1)PDELPSAGGDGGK
		EGSVLDILKS(1)PGFASPK																																				ANVS(0.853)S(0.147)PHREFPPATAR											SGGSGHAVAEPAS(1)PEQELDQNK
		LRTNLQPLESTQS(1)QDF																																				LLSSNEDDANILSS(1)PTDR											LFDVCGS(1)QDFESDLDRLK
		RQVS(1)ASELHTSGILGPETLR																																				RKQS(0.984)S(0.013)S(0.002)EIS(0.002)LAVER											NAS(1)AS(1)FQELEDKK
		LRSDAGLES(1)DTAMK																																				SVAAEGALLPQTPPS(1)PR											GEPAAAAAPEAGAS(1)PVEK
		S(0.076)T(0.076)S(0.848)PFGIPEEASEMLEAKPK																																				KKS(1)PNELVDDLFK											T(0.251)GS(0.336)PS(0.39)S(0.021)S(0.004)AS(0.032)ACS(0.964)PGGMLS(0.001)SAGGAPEGKDDKK
		YLFNQLFGEEDADQEVS(1)PDRADPEAAWEPTEAEAR																																				ATAPQTQHVS(1)PMRQVEPPAK											TAHNSEADLEESFNEHELEPS(0.791)S(0.209)PK
		MLPHAPGVQMQAIPEDAIPEES(1)GDEDEDDPDKR																																				GPS(1)WDPFRDWYPHSR											T(0.979)PEGRAS(0.02)PAPGS(0.001)GHPEGPGAHLDMNSLDR
		TEELIES(1)PKLESSEGEIIQTVDR																																				IRTS(0.001)PT(0.999)FR											RIQPQPPDEDGDHS(1)DKEDEQPQVVVLK
		KQFS(1)LENVQEGEILHDAK																																				SDAEEDGGT(0.003)VS(0.997)QEEEDRKPK											NRADHRS(0.008)S(0.992)PNVANQPPS(1)PGGK
		TSASEGNPYVSSTLSVPAS(1)PR																																				RPQYS(1)NPPVQGEVMEGADNQGAGEQGRPVR											LT(0.001)VENS(0.999)PKQEAGISEGQGTAGEEEEK
		ERESSANNSVS(1)PSESLR																																				RGS(0.993)GDT(0.004)S(0.001)S(0.001)LIDPDTSLSELRESLSEVEEK											SDPVDPDKEPEKEDVSAS(0.003)GPS(0.979)PEAT(0.018)QLAK
		SIPLECPLS(0.951)S(0.049)PK																																				GRECS(0.997)PT(0.001)S(0.001)SLER											S(1)FYSSHYAR
		FNLS(1)QESSYIATQYSLRPR																																				RIPVLS(1)PKPAVAPPAPPSSSQLCR											HSSETFSSTTTVTPVS(1)PSFAHNPK
		LLDAEDVDVPS(1)PDEK																																				NNEES(1)PTATVAEQGEDITSKK											ASPEPQRENAS(1)PAPGTTAEEAMSR
		AT(0.001)LPS(0.999)PDKLPGFK																																				NIIGS(0.002)S(0.998)PVADFSAIK											RS(0.019)PS(0.975)AS(0.004)S(0.002)LSSMSSVASSVSSRPSR
		VQMT(0.006)S(0.977)PS(0.003)S(0.001)T(0.004)GS(0.009)PMFK																																				LHS(0.957)S(0.043)NPNLSTLDFGEEK											GPPS(1)PPAPVMHS(0.997)PS(0.003)RK
		EQNSALPTS(0.009)S(0.991)QDEELMEVVEK																																				RPDDVPLSLS(1)PSK											IAIS(1)PLKS(1)PNK
		KQPPVS(1)PGTALVGSQK																																				AVPIAVADEGES(1)ES(1)EDDDLKPR											NHSDSSTSESEVSSVS(1)PLK
		EASRPPEEPSAPS(1)PTLPAQFK																																				RIS(1)LSDMPR											EMAHGS(1)QEAEAPGAVAGAAEVPREPPILPR
		IS(0.026)S(0.973)KS(0.001)PGHMVILDQTK																																				GY(0.007)T(0.01)S(0.983)DDDTWEPEIHLEDCK											MDLFGDLPEPERS(1)PRPAAGK
		RNLLEDDS(1)DEEEDFFLRGPSGPR																																				T(0.251)GS(0.336)PS(0.39)S(0.021)S(0.004)AS(0.032)ACS(0.964)PGGMLS(0.001)SAGGAPEGKDDKK											S(1)VENLPECGITHEQR
		MDLFGDLPEPERS(1)PRPAAGK																																				LQGSGVSLAS(1)KK											GPGEPDS(0.981)PT(0.019)PLHPPTPPILSTDR
		VVKPKS(1)PEPEATLTFPFLDK																																				RMSSEGPPRMS(1)PK											SDSVLPASHGHLPQAGS(1)LER
		TFLEGDWTS(0.999)PS(0.001)K																																				GVESSDVHPAPTVQQMS(0.84)S(0.16)PKPAEER											ASDGSFSLPLKPVIS(0.004)QPIHDS(0.047)KS(0.931)PGAS(0.018)NLK
		NALPPVLTTVNGQS(1)PPEHSAPAK																																				S(0.121)PT(0.879)MEQAVQTASAHLPAPAAVGRR											RLS(1)S(1)LRAS(0.211)T(0.159)S(0.63)K
		AFTGREFDELNPS(1)AQR																																				EAVREGRPPEPT(1)PAK											NSKS(1)PEEHLEEMMK
		FSKEEPVS(1)S(1)GPEEAVGK																																				KPGDGEVS(0.998)PS(0.001)T(0.001)EDAPFQHSPLGK											APS(1)PPLSQVFQTR
		AMLDSGIYPPGS(1)PGK																																				TALPAQS(0.002)AAT(0.998)LPAR											HAPT(0.002)Y(0.002)T(0.002)IPLS(0.992)PVLS(0.974)PT(0.027)LPAEAPTAQVPPSLPR
		RRQS(1)VGDFVSGALNK																																				TVSLGAGAKDELHIVEAEAMNYEGS(1)PIK											LAIQGPEDS(0.986)PS(0.014)R
		S(0.997)FS(0.003)EDVISHK																																				AYS(1)FCGTVEYMAPEVVNR											VQDT(0.004)S(0.994)NT(0.002)GLGEDIIHQLSK
		KLGDVS(0.063)PT(0.937)QIDVSQFGSFK																																				VISRPPPS(0.903)VS(0.097)PPK											KPS(0.998)PS(0.002)ESPEPWK
		DMS(1)PLSETEMALGK																																				AIS(1)SANLLVR											KAPEPEEEIEEVEES(1)EDEGEDPALDSLSQAIAFQQAK
		MRIPNYQLS(1)PTKLPSINK																																				ASIANSDGPTAGSQT(1)PPFK											DLVQPDKPAS(1)PK
		SRPTPQDY(0.002)EMRVS(0.995)PS(0.002)DTTPLVSR																																				S(0.019)GS(0.06)ALLQS(0.822)QS(0.788)S(0.239)T(0.071)EDPKDEPAELKPDSEDLSSQSSASK											LGGAVPFAPPEVS(1)PEQAK
		HS(0.003)T(0.997)PS(0.214)PT(0.479)RY(0.029)S(0.192)LS(0.061)PS(0.025)K																																				FQTGNKS(1)PEVLR											GPPDFSSDEEREPT(1)PVLGSGAAAAGR
		LFTPS(0.002)RS(0.998)QEEEEEK																																				SRESAS(0.001)PT(0.999)IPNLDLLEAHTK											GGAGGS(0.982)PGS(0.005)S(0.005)S(0.005)GS(0.001)GSSREDSAPVATAAAAGQVQQQQQR
		VKPET(1)PPRQS(0.056)HS(0.354)GS(0.575)IS(0.015)PYPK																																				NKAS(1)PQSEFMPSK											AQT(1)LPTSVVTITSESSPGKR
		SKGESDDFHMDFDS(1)AVAPR																																				RKS(1)ELEFETLK											AS(1)GVQVADEVCR
		GMGPGT(1)PAGYGR																																				KPPAPDPFARS(0.971)S(0.029)PR											TADGRVS(1)PAGGTLDDKPK
		AFLAELEQNS(1)PK																																				EVTPILAQTQSSGPQTSTTPQVLS(0.948)PT(0.038)IT(0.011)S(0.003)PPNALPR											SHISDQS(1)PLSSK
		AALGHLAGEAAAAPGPGT(1)PCASR																																				APVHFVEPLS(0.998)PT(0.002)GVAGHRK											HIKEEPLSEEEPCTSTAIAS(1)PEK
		TMFAQVES(1)DDEEAKNEPEWKK																																				LVHDS(1)LEDLQMTR											RIDFT(0.013)PVS(0.987)PAPS(0.999)PT(0.001)RGFGK
		SAVRPAS(1)LNLNR																																				SLSNS(0.999)NPDISGT(0.971)PT(0.021)S(0.007)PDDEVR											AAFDDAIAELDTLS(1)EESYK
		SLMS(1)S(1)PEDLTK																																				SPVPKS(1)PVEEK											KLPPPPPQAPPEEENES(1)EPEEPSGVEGAAFQSR
		NRADHRS(0.987)S(0.013)PNVANQPPS(1)PGGK																																				EGHSLEMENENLVENGADS(0.999)DEDDNS(0.001)FLK											RRLS(0.999)AQGQAIS(0.001)VVGSLSSMSPLEEEAPQAK
		NSDLLTS(1)PDVGLLK																																				VAAETQS(1)PSLFGSTK											S(0.001)T(0.001)IGVMVT(0.996)AS(0.003)HNPEEDNGVK
		S(0.77)GS(0.23)DAGEARPPTPASPR																																				TAADVVS(1)PGANSVDSR											KAPAGQEEPGT(1)PPS(0.57)S(0.43)PLSAEQLDR
		ASEPLLS(1)PPPFGESRK																																				T(0.188)QT(0.812)PPVS(1)PAPQPTEER											NKAS(1)PQSEFMPSK
		GPPDFS(0.999)S(0.999)DEEREPT(0.044)PVLGS(0.958)GAAAAGR																																				VHADLVISKPVS(0.003)KS(0.997)PER											GIS(1)PVVSEHRK
		PQSPVIQAAAVS(1)PK																																				S(0.001)KS(0.999)NPDFLKK											AKADS(1)PVNGLPK
		TSSGDPPS(1)PLVK																																				GGPLQALT(0.001)RES(0.985)T(0.014)R											RPPS(1)PDVIVLS(1)DNEQPSSPR
		S(0.01)FS(0.01)KEELMS(0.391)S(0.592)DLEET(0.99)AGS(0.005)T(0.002)S(0.001)IPK																																				ETSVSKEDTDHEEKAS(1)NEDVTK											S(1)PGALETPSAAGSQGNTASQGK
		S(0.136)IS(0.852)S(0.012)PSVSSETMDKPVDLSTRK																																				AS(0.09)S(0.909)LNENVDHS(0.001)ALLK											DMS(1)PLSETEMALGK
		HWVAPGGPYSAETPGVPS(1)PIAALK																																				RPQRAT(1)S(1)NVFAMFDQSQIQEFK											RFQDSEFSSS(1)QGEDEK
		S(0.003)KS(0.997)CHDLSVL																																				WCPTTNKPVKS(0.993)PT(0.007)PT(0.001)VNPR											SEVQQPVHPKPLSPDS(1)R
		RLGGLRPESPES(0.004)LT(0.009)S(0.971)VS(0.016)R																																				VQIS(0.004)PDS(0.996)GGLPER											ANS(1)FVGTAQYVSPELLTEK
		S(0.004)NS(0.996)LVSTFTMEK																																				TGADTTAAGPLFQQRPY(0.066)PS(0.934)PGAVLR											KKPEDS(0.096)PS(0.904)DDDVLIVYELTPTAEQK
																																						RVS(0.987)T(0.013)DLPEGQDVYTAACNSVIHR											YHGHS(1)MSDPGVS(1)YR
																																						KTPLALAGS(1)PTPK											SRPTPQDY(0.002)EMRVS(0.995)PS(0.002)DTTPLVSR
																																						APRS(1)PPVGSGPASGVEPTSFPVESEAR											ILIVTQT(1)PHYMR
																																						KPGPPLS(1)PEIR											RSQANGAGALS(0.001)YVS(0.999)PNTSK
																																						AS(0.002)CAS(0.998)IDIEDATQHLRDILK											AVVMPLQLIQEQAAS(1)PNAEIHILK
																																						IHRAS(1)DPGLPAEEPKEK											SRRPS(1)LGELLLR
																																						T(0.123)LS(0.844)PT(0.031)PAS(0.001)ATAPTSQGIPT(0.479)S(0.479)DEES(0.021)T(0.021)PKK											AAQPPAQPCQLCGRS(1)PLGEAPPGTPPCR
																																						FAQSAPGS(1)PLSSQPVLITVQR											RNREEEWDPEYT(1)PK
																																						ETPHS(1)PGVEDAPIAK											SETAPLAPTIPAPAEKT(1)PVKK
																																						KEES(1)EES(1)DDDMGFGLFD											RLQSIGT(0.003)ENT(0.997)EENRR
																																						LIPLDEECSMDETPYVETLEPGGS(0.927)GGS(0.07)PDGAGGS(0.003)K											LVHDS(1)LEDLQMTR
																																						VIYSQPS(1)ARS(1)EGEFK											RLAALALASSENS(0.001)S(0.016)S(0.992)T(0.992)PEECEEMSEKPK
																																						AFS(0.003)S(0.997)PQEEEEAGFTGR											RKHS(1)EEAEFTPPLK
																																						ADLIPY(0.004)QDS(0.996)PEGPDHSSASSGVPNPPK											T(0.004)YS(0.996)ECEDGTYSPEISWHHR
																																						RQMS(1)VPGIFNPHEIPEEMCD											T(1)FDWAEFRPIQQALAQER
																																						NPEDKS(1)PQLSLSPRPAS(1)PK											VDLENRCQS(1)LTEDLEFRK
																																						GPPS(1)PPAPVMHSPS(1)RK											NLSEIENVHGFVSHSHIS(1)PIK
																																																	ET(0.277)ES(0.724)APGS(1)PRAVT(1)PVPTK
																																																	RGS(1)LEMSSDGEPLSR
																																																	TVLPTVPES(1)PEEEVK
																																																	GILSLPHQAS(1)PVSR
																																																	NENTEGS(1)PQEDGVELEGLK
																																																	KPRPS(1)EGDEDCLPASK
																																																	SLYASS(1)PGGVYATR
																																																	SPVPKS(1)PVEEK
																																																	IEVDEGFCS(1)PKPSEIK
																																																	GRKIS(1)PPSYAR
																																																	PCSEETPAIS(1)PSK
																																																	S(0.001)RS(0.999)WPASPR
																																																	LKNGFPHPEPDCNPS(0.002)EAAS(1)EES(0.999)NS(0.999)EIEQEIPVEQK
																																																	GMGPGT(1)PAGYGR
																																																	CIACQAAKLS(1)PR
																																																	S(1)RGPT(1)PPAMGPR
																																																	PLGAIS(1)PVLNRK
																																																	APLKPYPVS(0.996)PS(0.004)DK
																																																	KLENS(1)PLGEALR
																																																	AS(1)PSLERPEK
																																																	LTPVS(0.001)LS(0.002)NS(0.997)PIK
																																																	HTGPNS(1)PDTANDGFVR
																																																	AAALQALQAQAPT(0.726)S(0.274)PPPPPPPLK
																																																	T(0.188)QT(0.812)PPVS(1)PAPQPTEER
																																																	GAQASSGS(1)PALPRK
																																																	SAMDSPVPASMFAPEPS(0.976)S(0.024)PGAAR
																																																	S(0.102)VS(0.882)T(0.016)T(0.001)NIAGHFNDESPLGLRR
																																																	AS(0.5)T(0.5)FCGTPDYIAPEILQGLK
																																																	IYNISGNGS(1)PLADSK
																																																	LVIGS(1)LPAHLS(1)PHMFGGFK
																																																	RAPS(1)VANVGSHCDLSLK
																																																	RHAPS(1)PEPAVQGTGVAGVPEESGDAAAIPAKK
																																																	EGVQGPLNVS(1)LSEEGK
																																																	RAS(1)AGPAPGPVVTAEGLHPSLPSPTGNSTPLGSSK
																																																	GLLAQGLRPES(1)PPPAGPLLNGAPAGES(1)PQPK
																																																	RDAGGPRPES(1)PVPAGR
																																																	GRGPS(0.995)PEGS(0.003)S(0.001)STESSPEHPPK
																																																	SVS(1)VATGLNMMK
																																																	FHS(1)PSTTWSPNK
																																																	ERPES(1)PMVPSEQVVEEAVPLPPQALTTSQDGHR
																																																	KAEGAAT(0.002)EEEGT(0.998)PKESEPQAAAEPAEAK
																																																	SAES(0.999)PT(0.001)SPVTSETGSTFKK
																																																	EPVADEEEEDS(1)DDDVEPITEFR
																																																	EVVKPVPIT(0.957)S(0.043)PAVSK
																																																	TFLESKEELSHS(1)PEPCTK
																																																	T(0.001)PT(0.999)PEPAEVETRK
																																																	TLSVAAAFNEDEDS(1)EPEEMPPEAK
																																																	VVNGAAASQPPS(1)K
																																																	RS(0.187)DS(0.813)PEIPFQAAAGPSDGLDASSPGNSFVGLR
																																																	MLPHAPGVQMQAIPEDAVHEDS(1)GDEDGEDPDKR
																																																	TSFSVGS(1)DDELGPIRK
																																																	NQS(1)SEDILRDAQVANK
																																																	VPPAPVPCPPPS(1)PGPS(0.132)AVPS(0.434)S(0.434)PK
																																																	VQGGVPAGS(0.998)DEY(0.002)EDECPHLIALSSLNR
																																																	HRHS(1)PTGPPGFPR
																																																	IACKS(1)PPPESMDTPTSTR
																																																	SFKLS(1)GFS(1)FKK
																																																	RAFQLEEGEET(1)EPDCK
																																																	RFS(1)LS(0.984)PS(0.016)LGPQASR
																																																	TTTAAGSSHSRPGVPVEGS(1)PGRNPGV
																																																	LRELDPSLVSANDS(1)PSGMQTR
																																																	GPPDFS(0.999)S(0.999)DEEREPT(0.044)PVLGS(0.958)GAAAAGR
																																																	VQIS(0.004)PDS(0.996)GGLPER
																																																	LHVGNIS(0.994)PT(0.006)CTNK
																																																	PRAS(1)PPPQGPLPGPPGALHR
																																																	VSSPLS(0.001)PLSPGIKS(0.998)PT(0.001)IPR
																																																	RFYPES(0.001)S(0.999)YK
																																																	KVPS(1)FTFTPTVTYQR
																																																	AGS(0.996)PS(0.004)RDVGPSLGLKK
																																																	STSAPQMS(1)PGSSDNQSSSPQPAQQK
																																																	SLHLS(1)PQEQSASYQDR
																																																	SVNEILGLAESS(1)PNEPK
																																																	ETVQTTQS(1)PTPVEK
																																																	AAAT(1)PESQEPQAK
																																																	DMPGGFLFEGLS(1)DDEDDFHPNTR
																																																	RGTGQS(1)DDS(1)DIWDDTALIK
																																																	EEAPAS(1)PLRPLYPQIS(1)PLK
																																																	S(0.996)QGDS(0.004)NPAAIPHAAEDIQGDDRWMSQHNR
																																																	S(0.136)IS(0.852)S(0.012)PSVSSETMDKPVDLSTRK
																																																	ATNES(1)EDEIPQLVPIGKK
																																																	EEPDSENIPQELLSNLGHPES(1)PPRK
																																																	RSAGGSSPEGGEDS(1)DREDGNYCPPVK
																																																	SQDVAVS(1)PQQQQCSK
																																																	SHNVAAGSYEAPLPPGS(1)FHGDFAYGTYR
																																																	AAEAGGAEEQYGFLT(0.001)T(0.999)PTK
																																																	EIAIVHS(1)DAEKEQEEEEQKQEMEVK
																																																	RFGEYNSNMS(1)PEEK
																																																	IHRAS(1)DPGLPAEEPKEK
																																																	WEETRTPESQPDT(1)PPGTPLVSQDEK
																																																	IKEEVLS(1)ES(1)EAENQQAGAAALAPEIVIK
																																																	S(1)GGGVIRGPAGNNDCR
																																																	RGS(0.998)GPEIFT(0.001)FDPLPEPAAAPAGRPSASR
																																																	LSSAGPRS(1)PYCK
																																																	FKT(1)QPVTFDEIQEVEEEGVS(1)PMEEEK
																																																	IACKS(1)PPPESVDTPTSTK
																																																	QEAKPQQAAGMLS(1)PK
																																																	RYPS(0.047)S(0.951)IS(0.002)S(0.633)S(0.367)PQK
																																																	S(1)DFDEFERQLNENKQER
																																																	REREES(1)EDELEEANGNNPIDIEVDQNK
																																																	NSLESISSIDRELS(1)PEGPGK
																																																	ENIKPNET(0.004)S(0.994)PS(0.001)FSK
																																																	S(0.018)KS(0.981)EEAHAEDS(0.001)VMDHHFR
																																																	KAVPVES(1)PVQKV
																																																	RVQS(1)LPSVPLSCAAYR
																																																	NPEDKS(1)PQLSLSPRPAS(1)PK
																																																	TSSAFVGKT(1)PEASPEPK
																																																	RLQS(0.998)IGT(0.002)ENTEENRR
																																																	TPEELDDS(1)DFETEDFDVR
																																															wt+LPS	162	S(0.699)NS(0.301)VGIQDAFNDGSDSTFQK
																																																	APPTLQAETATKPQATSAPS(1)PAPK
																																																	ALS(1)RQLS(0.821)S(0.178)GVS(0.001)EIR
																																																	RS(0.093)S(0.906)DPALIGLS(0.001)TSVSDSNFSSEEPSRK
																																																	ISQDADLKT(0.999)PT(0.001)KPK
																																																	LTRPAAS(1)PAVGEK
																																																	GFS(1)DSGGGPPAK
																																																	SRS(1)VS(1)PCSNVESR
																																																	VGGS(1)DEEASGIPSR
																																																	QSQQPMKPIS(1)PVKDPVSPASQK
																																																	S(0.997)KLS(0.004)PS(0.997)PS(0.002)LRK
																																																	RPDPDS(1)DEDEDYERER
																																																	TLPSMVHRVS(1)GQPQSVTASSDK
																																																	VQT(0.001)T(0.999)PPPAVQGQK
																																																	RVTQHES(1)DNENEIQIQNK
																																																	ELSESVQQQSTPVPLIS(1)PK
																																																	LKS(1)EDELRPEVDEHTQK
																																																	VNLEESSGVENS(1)PAGARPK
																																																	FCS(0.001)NS(0.006)GRLS(0.993)GPAELR
																																																	HS(0.001)DS(0.001)GT(0.001)S(0.001)EAS(0.03)LS(0.965)PPS(0.542)S(0.458)PPS(0.001)RPR
																																																	RTPAPPEPGS(1)PAPGEGPSGRK
																																																	VS(0.004)GRT(0.977)S(0.019)PPLLDR
																																																	PSANRENFS(1)PER
																																																	RLAAAEETAVS(1)PRK
																																																	ERAMS(0.999)T(0.001)TSISSPQPGK
																																																	GNFGGS(1)FAGSFGGAGGHAPGVAR
																																																	EIQNGNLHES(1)DSESVPR
																																																	SSSLEMTPYNT(0.001)PQLS(0.998)PATTPANKK
																																																	FLKS(1)PPLHK
																																																	DMES(1)PTKLDVTLAK
																																																	T(0.016)PRIS(0.984)PPIKEEETK
																																																	TFPLAHS(1)PQAECEDQLDAQER
																																																	SQLPTLEQDGGTQNPVS(0.005)S(0.994)PGMS(0.001)QELR
																																																	HSGPNS(1)ADSANDGFVR
																																																	ELAQRQEEEAAQQGPVVVS(0.999)PAS(0.001)DYK
																																																	APAS(1)PGAGSDAQGPQFGWDHSLHK
																																																	AKNS(1)DLLTSPDVGLLK
																																																	SKPLAAS(1)PKPAGLK
																																																	GRLVREDENDAS(1)DDEDDDEK
																																																	SRVS(1)VS(0.335)PGRT(0.673)S(0.989)VT(0.003)K
																																																	T(1)PKDSPGIPPSAGAHQLFR
																																																	WDKDDFES(1)EEEDVK
																																																	RNS(1)FTPLSSSNTIR
																																																	T(0.04)T(0.04)GT(0.92)PPDSSLVTYELHSRPEQDK
																																																	ET(0.003)LS(0.997)PPGNGCAIYR
																																																	RHS(0.999)AS(0.001)NLHALAHPAPSPGSCSPK
																																																	ERPISLGIFPLPAGDGLLT(1)PDAQK
																																																	S(0.001)GHS(0.996)PT(0.004)RGAMQVAMNGK
																																																	LGSLSARS(0.014)DS(0.986)EATISR
																																																	RQSNVAAPGDAT(1)PPAEK
																																																	S(0.02)GNFGGS(0.971)RNMGGPY(0.008)GGGNYGPGGS(0.001)GGSGGYGGR
																																																	S(0.141)AAS(0.859)REDLVGPEVGASPQSGRK
																																																	RRS(1)PSPY(0.001)Y(0.001)S(0.999)R
																																																	SPMSTNSSVHTGS(1)DVEQDAEK
																																																	NSS(1)PAPPQPAPGK
																																																	GS(1)PLNAAPYGIESMSQDTEVR
																																																	HVVS(1)PEQIATSDK
																																																	EGEEPTVYS(1)DEEEPKDESAR
																																																	ALRPPT(0.088)S(0.912)PGVFGALQNFK
																																																	SHGLEPAAPS(1)PR
																																																	RNS(1)LTGEEGQLAR
																																																	KLNS(1)PEETAFQTPK
																																																	ELS(1)QNTDESGLNDEAIAK
																																																	RKPVLPALTINPTIAEGPS(0.899)PT(0.069)S(0.027)EGAS(0.004)EANLVDLQK
																																																	AGLESGAEPGDGDS(1)DTTKK
																																																	TQFEDLVPS(0.995)PT(0.005)SEK
																																																	LSSAHS(0.999)MS(0.001)DLSGSHMSSEK
																																																	VLSNRGDS(1)LSR
																																																	S(0.001)PQLS(0.003)LS(0.996)PRPAS(1)PK
																																																	AVPMAPAPAS(0.997)PGS(0.002)SNDSSAR
																																																	TLTRT(0.001)S(0.999)QETADVK
																																																	SPAPGAPT(0.003)RS(0.996)PS(0.001)TPAK
																																																	RLS(0.996)S(0.003)ASTGKPPLSVEDDFEK
																																																	RRS(1)S(0.001)LS(0.699)PPS(0.125)S(0.175)AYER
																																																	SLS(1)PGVSR
																																																	LQTTDNLLPMS(1)PEEFDEVSR
																																																	S(1)KS(1)PPKVPIVIQDDSLPAGPPPQIR
																																																	SGSSFVHQAS(1)FK
																																																	NSDLLT(1)SPDVGLLK
																																																	GGVTGS(1)PEASISGSK
																																																	LLSSNEDDANILSS(1)PTDR
																																																	EREDSGDAEAHAFKS(0.996)PS(0.004)K
																																																	GSFS(1)DTGLGDGK
																																																	T(0.002)QLS(0.996)PS(0.002)IK
																																																	NTDSWAPPLEIVNHRS(0.258)PS(0.742)REK
																																																	GRPPAEKLS(1)PNPPK
																																																	RQS(0.997)PS(0.004)PS(0.948)T(0.051)RPIR
																																																	VQSLEGEKLS(1)PK
																																																	GPS(1)WDPFRDWYPHSR
																																																	KNS(1)LRVEGDNIYVR
																																																	KKPGDASSLPDAGLS(0.996)PGS(0.004)QVDSK
																																																	NPSDSAVHS(1)PFTK
																																																	HSQPSPEPHS(1)PTEPPAWGSSIVK
																																																	RRS(0.01)S(0.99)LS(0.999)PPS(0.001)S(0.001)AYER
																																																	KPS(0.978)GS(0.022)PDLWK
																																																	TIS(1)NPEVVMK
																																																	FQS(0.001)QADQDQQAS(0.007)GLQS(0.989)PPS(0.003)RDLSPTLIDNSAAK
																																																	AQS(1)LLSTDREASIDILHSIVK
																																																	VAS(0.003)S(0.997)PVMVSNPATR
																																																	APGS(0.998)PRGQHEPS(0.002)KPPPAGETVTGGFGAK
																																																	ILELT(1)PEPDRPR
																																																	RLS(1)NPCIQR
																																																	KQPPKEPSEVPT(1)PK
																																																	IAS(0.999)PVS(0.001)RKEPPLTPVPLK
																																																	TESSPSEASQHSMQS(1)PQK
																																																	T(0.836)PS(0.164)IQPSLLPHAAPFAK
																																																	RSLS(1)EQPVMDTATATEQAK
																																																	T(0.004)QLS(0.021)QGRS(0.976)S(0.999)PQLDPLRK
																																																	RS(0.999)RS(0.001)VSPCSNVES(1)R
																																																	AIEPQKEEADENYNS(1)VNTR
																																																	NTDVAQS(1)PEAPKQEAPAK
																																																	TLS(1)SSAQEDIIR
																																																	S(0.001)LLNART(0.999)PENHENLFLQPPK
																																																	LLAEALNQVTQRAS(1)R
																																																	ADREVQAEQPSSSS(1)PR
																																																	TTPPTQKPPS(1)PPMSGK
																																																	DKFS(1)PFPVQDRPESSLVFK
																																																	LTEGCS(1)FR
																																																	RTFS(1)EPGDHPGMLTSGK
																																																	THTTALAGRS(1)PS(0.999)PAS(0.001)GR
																																																	APVHFVEPLS(0.998)PT(0.002)GVAGHRK
																																																	RPDHS(0.031)GGS(0.969)PS(1)PPTSEPAR
																																																	AGT(0.001)GYAS(0.999)PDRTHVLAAGK
																																																	GAAAAATGQPGTAPAGT(1)PGAPPLAGMAIVK
																																																	NRENS(1)PSSQSAGLSSINK
																																																	S(0.001)GT(0.001)GS(0.99)GGS(0.005)T(0.003)PHISGPGPGRPSSK
																																																	SRVS(1)VS(0.766)PGRT(0.139)S(0.093)VT(0.002)K
																																																	AADS(1)DDGAVSAPAASDGGVSK
																																																	EHNSMWAS(0.003)LS(0.013)S(0.985)PDAEAVEPDFSSIER
																																																	MTGSAPPPS(1)PTPNK
																																																	S(0.001)KS(0.999)NPDFLKK
																																																	GGPLQALT(0.001)RES(0.985)T(0.014)R
																																																	TGHILHPEYLQPLPSTPVS(1)PIELDAK
																																																	DITDPLSLNTCTDEGHVVLAS(1)PLK
																																																	EPKEPS(1)PKQDVVGK
																																																	S(0.011)AGAGS(0.989)PARPPS(1)PR
																																																	RS(0.005)S(0.995)LCGEEQGSPEELRQR
																																																	RNS(1)VERPAEPVAGAATPSLVEQQK
																																																	MFGGPGTASRPS(0.009)S(0.956)S(0.035)R
																																																	KLGVS(1)VS(1)PSR
																																																	AVYIGVHVPFS(0.005)KES(0.995)R
																																																	HSAAAAGRAPS(1)PPPPGSEAAPS(0.985)PS(0.014)K
																																																	TGADTTAAGPLFQQRPY(0.066)PS(0.934)PGAVLR
																																																	KTPLALAGS(1)PTPK
																																																	HSPIAPS(0.001)S(0.998)PS(0.001)PQVLAQK
																																																	LHS(0.01)S(0.986)S(0.004)LELGPRPLEQENER
																																																	SPPREGSQGELT(1)PANSQSR
																																																	ESVPEFPLS(1)PPKK
																																																	LHPDGS(1)PDVAGEK
																																																	LDRLNTVAS(1)PK
																																																	TNTMNGS(1)KSPVISRPK
																																																	LAEDEGDS(1)EPEAVGQSR
																																																	ETPHS(1)PGVEDAPIAK
																																																	SRT(0.003)S(0.997)VQTEDDQLIAGQSAR
																																																	EDKS(1)PETGTAGGSSTASYSAGR
																																																	RMS(1)DEFVDSFKK
																																																	GRWES(1)QQDVSQTTVSR
																																																	GKIEVLDS(1)PASK
																																																	TLSAS(0.991)T(0.009)QDLSPH
																																																	EAASSSSGTQPAPPAPAS(1)PWDSKK
																																																	HYGITS(1)PISLAAPK
																																																	AQGVRS(1)PLLR
																																															wt+EBSS+LPS	109	HRS(0.988)LT(0.012)AHSLLPLAEK
																																																	DRLGS(1)PLAVDEALRR
																																																	YSISLS(1)PPEQQK
																																																	FPS(1)PHPS(1)PAK
																																																	KLS(1)NPDIFSSTGK
																																																	T(1)PRT(0.001)PRT(0.999)PQLK
																																																	S(0.005)GS(0.995)MDPSGAHPSVR
																																																	AGGPTT(0.001)PLS(0.996)PT(0.003)R
																																																	ETNLDS(1)LPLVDTHSK
																																																	KAS(1)PPSGLWSPAYASH
																																																	RVTNDIS(1)PES(1)S(1)PGVGR
																																																	DERS(0.001)DS(0.998)RAQAVS(0.001)EDAGGNEGR
																																																	ARS(1)RT(1)PPSAPSQSR
																																																	SATPEPVTDNRDVEDMELS(1)DVEDDGSK
																																																	T(0.001)GEPS(0.999)PPHDILHEPPDVVS(1)DDEK
																																																	KSPS(1)AGDVHILTGFAK
																																																	S(0.962)ET(0.038)APAAPAAPAPAEKT(1)PVKK
																																																	ASLVALPEQTASEEET(1)PPPLLTK
																																																	EAAGPAPS(1)PMR
																																																	S(0.109)LS(0.887)LDPGQS(0.003)LEPHPEGPQR
																																																	NRHS(1)PDHPGMGSSQASSSSSLR
																																																	SVSSVLSSLT(1)PAK
																																																	RQDS(1)MEALQMDR
																																																	ASAVSELS(1)PRER
																																																	T(0.001)IS(0.999)AQDTLAYATALLNEK
																																																	RQLS(1)MTLR
																																																	S(1)APAS(1)PTHPGLMSPR
																																																	VPAKLS(1)PMK
																																																	LRPVS(1)PEEIRR
																																																	DYNASAST(0.004)IS(0.98)PPS(0.015)S(0.001)MEEDK
																																																	RT(0.005)LS(0.995)DPPS(1)PLPHGPPNK
																																																	NALTALFTSSGRPPSQPNT(0.012)QDKT(0.945)PS(0.043)K
																																																	IISVT(1)PVK
																																																	TEEARPSPAPGPGT(0.999)PTGTPTR
																																																	PVAPQVPS(0.998)PGGAPGQGPY(0.002)PYSLSEPAPLTLDTSGK
																																																	RGS(0.999)PTTGFIEQK
																																																	APS(1)LTDLVK
																																																	DSISAVSSEKVS(1)PSK
																																																	GASDVGAGEPGPERAPLS(1)PGRK
																																																	GTEPSPGGTPQPS(0.999)RPVS(1)PAGPPEGVPEEAQPPR
																																																	EEAT(1)YGVWAERDSDDERPSFGGK
																																																	SLS(1)YSPVER
																																																	VISRPPPSVS(1)PPK
																																																	NVALLSQLYHS(1)PAR
																																																	NSSTPGLQVPVS(0.006)PT(0.994)VPIQNQK
																																																	MVIQGPS(0.896)S(0.104)PQGEAMVTDVLEDQK
																																																	VPEEAAQDRPMS(1)PGDCPPETTETPK
																																																	SKSPLPPEEEAKDEEEDQT(0.999)LVNLDTYTSDLHFQVSK
																																																	LSSQIS(1)AGEEK
																																																	GRS(0.999)PS(0.001)QYHDFAEK
																																																	DFNRT(0.002)PGS(0.997)RQAS(0.915)PT(0.085)EVVER
																																																	LGS(1)PDYGNSALLSLPGYRPTTR
																																																	RYWEEETVPTTAGAS(1)PGPPR
																																																	DNTRPGANS(1)PEMWSEAIK
																																																	LQQTVPADAS(0.998)PDS(0.002)K
																																																	RPQYS(1)NPPVQGEVMEGADNQGAGEQGRPVR
																																																	RLEQTSVRDPS(1)PEADAPVLGSPEK
																																																	AQSLVISPPAPS(1)PRK
																																																	AHLPLGQS(0.846)NS(0.133)CGS(0.021)VLPPSLAAMAK
																																																	RYS(1)DLTTLVAFPSSSVYPTK
																																																	ANSWQLVET(1)PEK
																																																	RMS(1)EGRGLPPPPR
																																																	AVPIAVADEGES(1)ES(1)EDDDLKPR
																																																	SQPGQKPAAS(1)PRPR
																																																	RASQGLLSSIENSES(1)DSSEAK
																																																	GLGHPPS(0.949)S(0.051)PLLK
																																																	GGGGGGS(1)PGPTAGPEPLSLPGILHFIQHEWAR
																																																	S(0.018)LS(0.976)S(0.006)GESGPGSPTHSHSLSPR
																																																	VAVVRT(1)PPKSPSSAK
																																																	LDLLGNLPGS(1)K
																																																	GVESSDVHPAPTVQQMS(0.84)S(0.16)PKPAEER
																																																	NRPTS(0.001)IS(0.999)WDGLDSGK
																																																	TVSLGAGAKDELHIVEAEAMNYEGS(1)PIK
																																																	S(1)HDNVYSLGGLEGRK
																																																	RVS(1)GDAAQDLDR
																																																	DAS(1)PINRWS(1)PTR
																																																	T(0.007)PRT(0.993)PRT(1)PQLK
																																																	LFTPS(0.002)RS(0.998)QEEEEEK
																																																	NHS(1)GS(1)RT(1)PPVALNSSR
																																																	SKGESDDFHMDFDS(1)AVAPR
																																																	RGLNS(0.002)S(0.002)FET(0.871)S(0.124)PKK
																																																	AFLAELEQNS(1)PK
																																																	T(0.006)IS(0.993)PS(0.001)TSNNIPLMR
																																																	GNIDGNVSCSENLVANT(0.002)ARS(0.998)PQFINLK
																																																	ETSVSKEDTDHEEKAS(1)NEDVTK
																																																	NRADHRS(0.987)S(0.013)PNVANQPPS(1)PGGK
																																																	SPLAEEGRLNCST(0.01)S(0.99)PEIFRK
																																																	AAPSTAPAEAT(1)PPKPGEAEAPPK
																																																	ARLGEAS(1)DSELADADK
																																																	S(0.937)LS(0.063)LDPGQSLEPHPEGPQR
																																																	VRANS(0.272)KS(0.728)EGS(1)PVLPHEPAK
																																																	THDHQLESSLS(1)PVEVFAK
																																																	HVVLGAIENKVES(1)K
																																																	T(0.073)PQPCS(0.927)RPAS(1)PEPELLPEADSK
																																																	LQT(1)PNT(1)FPK
																																																	S(0.946)LS(0.054)PNHNTLQTLK
																																																	APRS(1)PPVGSGPASGVEPTSFPVESEAR
																																																	RGPEVTSQGVQTSS(1)PACK
																																																	QILIACS(1)PVSSVR
																																																	SPT(0.001)S(0.999)PLNMK
																																																	PAS(1)VHFK
																																																	RLPRS(1)PS(0.986)PY(0.003)S(0.01)R
																																																	FAQSAPGS(1)PLSSQPVLITVQR
																																																	RGS(0.993)VS(0.006)S(0.001)VSPKPPSSFK
																																																	VVPSFLPVDQGGS(1)LVGR
																																																	RLGGLRPESPES(0.004)LT(0.009)S(0.971)VS(0.016)R
																																																	VVNANQNAS(1)PNVPGK
																																																	STLTTLPFPGAEANS(0.999)PGKAEAEKPR
																																																	AMLDQLMGT(0.038)S(0.962)RDGDTTR
